# Supplementary material for: The Aedes aegypti siRNA pathway mediates broad-spectrum defense against human pathogenic viruses and modulates antibacterial and antifungal defenses
Source: PubMed Central journal article supplement (PMC9182253; doi:10.1371/journal.pbio.3001668), 2022-06-09
Supplement: pbio.3001668.s012.pdf [file pbio.3001668.s012.pdf]

Fig. 1D

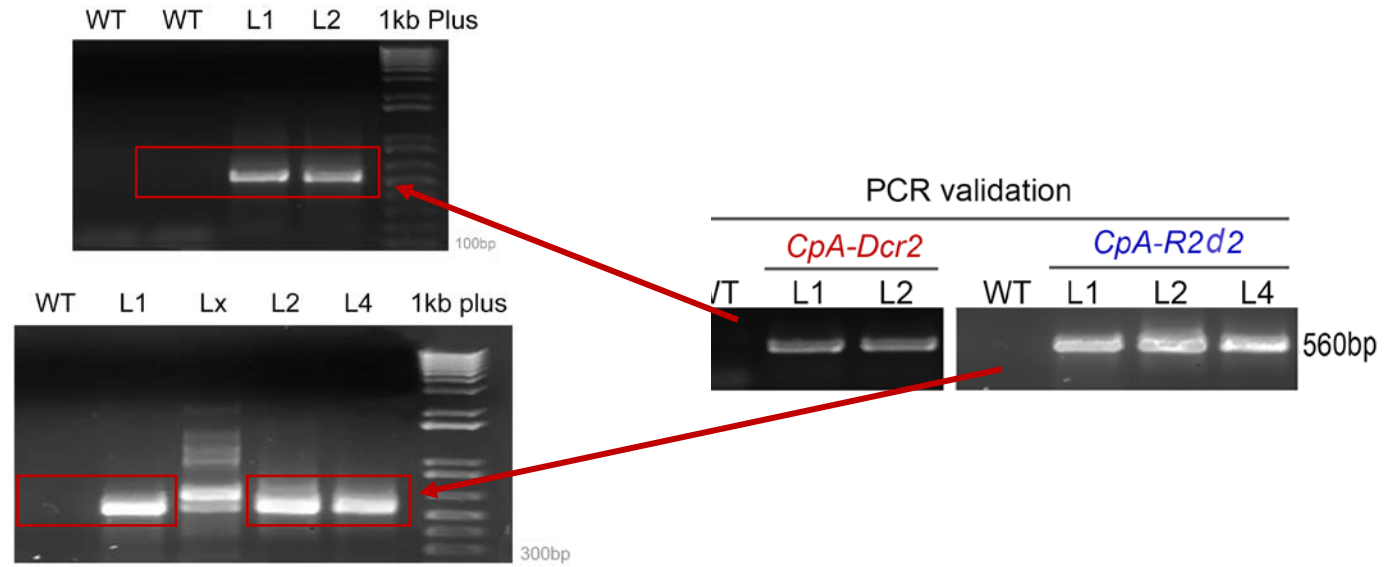

Lx: unconfirmed line
