# Supplementary material for: The Aedes aegypti siRNA pathway mediates broad-spectrum defense against human pathogenic viruses and modulates antibacterial and antifungal defenses
Source: PLoS Biol. 2022 Jun 9;20(6):e3001668. doi: 10.1371/journal.pbio.3001668 (PMC9182253; doi:10.1371/journal.pbio.3001668)
Supplement: S3 Data — (XLSX) [file pbio.3001668.s011.xlsx]

## Sheet: Union_for_cluster
geneID	LVP	DCR2	R2D2
AAEL000006	23.5999	7.50003	43.5374
AAEL000015	4.49196	7.37475	4.14967
AAEL000051	4.44497	10.9099	4.31105
AAEL000080	734.71	301.94	830.278
AAEL000146	3.5084	5.09795	0.854231
AAEL000150	31.6277	33.6316	15.0231
AAEL000163	3.73024	4.71649	1.66137
AAEL000223	451.749	407.194	227.71
AAEL000244	11.2768	26.1509	17.6834
AAEL000274	68.2891	30.9177	57.4195
AAEL000314	43.202	18.8737	43.5521
AAEL000321	3.25363	0.522618	2.81055
AAEL000322	2.45029	0.62483	2.29795
AAEL000330	2.68383	2.24442	6.65552
AAEL000352	1.96775	0	1.5078
AAEL000362	3.18255	9.50985	2.00706
AAEL000456	8.54413	6.17625	13.5582
AAEL000496	0.125316	0.298935	0.801922
AAEL000508	0.493741	3.05385	0.339842
AAEL000516	47.9425	28.006	40.4499
AAEL000575	21.3445	20.7614	8.7561
AAEL000581	22.3572	27.0422	11.8337
AAEL000595	0.702797	0.517524	0.097564
AAEL000621	30.6911	24.9104	58.9646
AAEL000651	124.084	117.581	70.2915
AAEL000658	25.0219	13.3504	9.47261
AAEL000678	13.5648	4.04609	4.20606
AAEL000721	0.494975	1.19266	0.369571
AAEL000735	16.0104	9.0346	15.3855
AAEL000794	7.98266	16.0226	14.3036
AAEL000800	58.9623	28.0685	49.7038
AAEL000816	3.57842	5.01948	1.529
AAEL000817	1.21212	1.36268	0.0777528
AAEL000898	24.2174	75.0071	47.1719
AAEL000905	60.831	31.117	72.3461
AAEL000906	7.39164	9.34915	5.26283
AAEL000933	13.9533	5.64623	8.99967
AAEL000948	116.115	257.713	214.327
AAEL000956	9.58945	6.4373	4.41217
AAEL000963	17.8951	25.0764	7.01835
AAEL000967	19.0423	24.6134	10.788
AAEL000990	0.378165	0.0352033	0.861383
AAEL001020	114.457	55.0189	81.9854
AAEL001027	0.759525	0	0.87916
AAEL001034	0.596042	0.343443	0.967677
AAEL001047	16.7756	26.5021	13.3383
AAEL001062	3.2594	6.51245	9.71459
AAEL001077	1.80287	2.32667	0.562585
AAEL001078	0.816316	2.59442	0.641531
AAEL001091	3.56346	5.65392	2.88664
AAEL001095	0.445515	0.576379	1.74557
AAEL001100	1392.49	537.532	971.615
AAEL001160	0.804915	0.139773	1.18876
AAEL001176	107.779	55.1435	45.5215
AAEL001186	10.0226	5.39109	17.0008
AAEL001194	51.0005	41.3327	23.9776
AAEL001208	0.290002	0.00472144	0.888543
AAEL001288	0.990111	0.0845807	1.5363
AAEL001301	172.828	71.0245	118.677
AAEL001329	13.417	8.25194	16.881
AAEL001340	0.250741	0.428934	0.0754475
AAEL001359	1.34675	1.37163	3.50794
AAEL001396	8.5428	4.25918	7.96307
AAEL001409	20.4685	23.2798	11.1246
AAEL001413	7.35768	1.08978	8.93928
AAEL001419	0.0165279	2.32262	1.4905
AAEL001434	31.9425	29.5407	17.8055
AAEL001464	77.9607	43.1308	76.3401
AAEL001467	7.50581	11.1394	6.23867
AAEL001529	1.88877	9.63322	0.305443
AAEL001533	14.9863	6.9067	24.0009
AAEL001535	1.64188	10.8601	0.131957
AAEL001539	4.85693	8.29212	3.13575
AAEL001546	5.99666	8.18548	4.22967
AAEL001556	6.94096	5.21678	2.9798
AAEL001565	7.74929	5.25621	3.08616
AAEL001577	593.676	1118.4	444.466
AAEL001586	40.9074	31.1849	20.143
AAEL001603	6.51523	6.8361	3.72864
AAEL001611	1018.39	324.052	317.397
AAEL001613	0.959517	1.26027	0.00801922
AAEL001621	1028.52	623.233	98.8861
AAEL001627	41.3541	31.9874	21.4135
AAEL001667	783.603	1367.62	669.067
AAEL001674	5511.55	2915.39	1234.61
AAEL001693	3416.62	1256.27	2605.36
AAEL001698	26.2035	48.2197	41.4229
AAEL001701	1188.23	7.93227	695.154
AAEL001705	3.50305	11.2656	5.31299
AAEL001748	3.38619	2.10912	6.08315
AAEL001768	3.84607	0.863956	3.83133
AAEL001793	2.7575	0.0854673	4.69434
AAEL001806	1.22645	0	1.66634
AAEL001812	11.2171	1.96037	6.10996
AAEL001816	163.653	219.635	130.885
AAEL001829	2.40727	0.353953	1.91714
AAEL001835	0.417516	2.23578	0.0381431
AAEL001839	78.898	202.084	50.6681
AAEL001878	7.3727	5.86424	2.06634
AAEL001892	7.61386	30.1241	23.1472
AAEL001905	0.640086	0.886184	3.4668
AAEL001940	6.72065	3.67257	3.40567
AAEL001944	5.95881	2.69489	7.89431
AAEL001969	12.1306	19.3224	7.00876
AAEL001986	1.21005	3.02504	1.93383
AAEL002063	16.6605	21.4147	10.1318
AAEL002102	12.5898	23.1725	12.89
AAEL002107	37.5995	40.4134	20.1324
AAEL002126	0.0413296	0.0759207	0.468221
AAEL002175	19.7449	38.2827	22.9975
AAEL002194	0.244142	8.5731	0.39437
AAEL002199	0.861942	0	0.653445
AAEL002222	1.0546	0.477905	1.25596
AAEL002257	2.05725	7.37516	5.81027
AAEL002263	1454.12	2674.81	3691.69
AAEL002307	39.3499	93.8449	47.9365
AAEL002309	1234.48	2597.03	2767.01
AAEL002331	3.7709	6.66022	1.37556
AAEL002341	0.22702	0.0941263	0.574933
AAEL002343	0.221511	0.246907	0
AAEL002347	2672.93	5051.99	4782.69
AAEL002358	10.2303	16.059	6.83905
AAEL002360	799.809	2531.26	3509.02
AAEL002368	0	0.763006	2.47607
AAEL002385	10.9878	10.3507	19.3788
AAEL002390	0.700094	1.93434	0.523557
AAEL002413	2.84063	1.44585	4.72951
AAEL002424	2.73959	0.897014	8.36821
AAEL002432	71.3366	28.725	25.0258
AAEL002467	491.183	2071.65	1073.84
AAEL002482	6.03531	21.9631	10.4208
AAEL002488	4.0216	2.63547	5.89953
AAEL002492	0.953206	13.1868	8.23427
AAEL002495	2725.3	8834.43	3510.96
AAEL002516	9.37345	11.2387	23.4543
AAEL002517	0.417485	1.18884	0.105218
AAEL002521	2.74434	2.84911	7.07187
AAEL002535	0.320836	0.588729	0.0578468
AAEL002560	277.337	166.049	381.391
AAEL002602	0.788348	0.0162787	1.30692
AAEL002610	9.66413	38.9331	3.38895
AAEL002624	0.798168	5.50409	0.448797
AAEL002639	173.588	261.847	141.052
AAEL002644	3.97802	1.92522	1.07728
AAEL002671	2.18791	6.28255	3.48127
AAEL002681	37.6674	20.0783	38.3079
AAEL002688	1.61031	0.395792	3.52009
AAEL002701	9.47971	18.9981	8.51667
AAEL002709	6.7157	10.372	5.95417
AAEL002717	4.11651	1.6962	3.95359
AAEL002733	133.651	90.4951	176.276
AAEL002735	0.337588	0.525471	4.31034
AAEL002737	247.339	166.349	75.459
AAEL002747	0.179145	0	0.363092
AAEL002784	2.47542	3.30165	6.72429
AAEL002800	2.25499	1.09268	5.14063
AAEL002804	25.934	40.627	19.8031
AAEL002848	12.5828	51.5576	25.3129
AAEL002856	10.824	8.06951	5.48105
AAEL002857	12.1764	3.98409	11.1628
AAEL002937	21.5127	12.2508	26.2729
AAEL002943	0.410258	0.401381	0.115653
AAEL002970	0.369555	1.43325	0.0241111
AAEL002992	7.45336	11.3729	4.36394
AAEL002995	14.8592	7.05748	21.0196
AAEL003003	0.440119	1.50533	0.455231
AAEL003004	2.16725	1.25623	3.75264
AAEL003024	13.2809	4.36405	1.60013
AAEL003037	24.0272	74.9707	49.1984
AAEL003056	198.11	215.13	120.784
AAEL003063	4.17721	8.65483	8.62464
AAEL003084	5.59584	11.0836	5.47435
AAEL003092	2.61273	5.01624	1.58565
AAEL003096	4.13467	2.94668	0.176751
AAEL003107	0.268154	0.0936037	1.3269
AAEL003114	29.8728	0	63.9672
AAEL003122	1.93572	2.94957	0.721254
AAEL003190	63.7731	131.322	103.264
AAEL003212	31.8713	103.541	42.263
AAEL003227	10.7002	26.7317	10.9402
AAEL003236	3.28627	8.72956	6.83011
AAEL003267	15.8006	21.8007	13.1581
AAEL003276	0.030261	0.41492	0.100521
AAEL003279	4.73587	4.70822	1.42202
AAEL003288	6.45272	4.27177	9.34946
AAEL003299	1.96578	18.1057	1.55075
AAEL003313	975.883	425.085	763.498
AAEL003331	0.548689	0.324479	0.943666
AAEL003365	36.9352	14.0619	25.5904
AAEL003397	2.53781	1.15192	0.411574
AAEL003402	9.71817	6.01661	3.43855
AAEL003405	11.0633	12.5865	6.73081
AAEL003415	14.1176	29.0005	20.5785
AAEL003434	511.597	1253.49	639.841
AAEL003445	7.44478	21.3245	10.7349
AAEL003508	134.123	151.402	72.2512
AAEL003512	7.75945	20.6383	5.04769
AAEL003524	175.094	89.4443	171.931
AAEL003550	79.3512	233.096	108.865
AAEL003567	0.0624159	0.60752	0.0197019
AAEL003579	8.71922	3.22002	11.8046
AAEL003585	2.7817	0	2.19366
AAEL003589	21.1092	2.29821	17.7513
AAEL003590	758.495	165.767	612.968
AAEL003596	55.6277	15.1276	35.5359
AAEL003613	7.00282	1.91015	9.04286
AAEL003622	1.86579	1.6746	0.599292
AAEL003626	0.753181	1.9746	0.412613
AAEL003641	4.20003	12.2149	5.18937
AAEL003643	1.49415	0.0378105	1.8918
AAEL003645	157.51	312.125	192.57
AAEL003699	0.284205	0.4862	0.115871
AAEL003723	91.9572	124.892	205.552
AAEL003728	1.39902	3.15014	8.19056
AAEL003734	33.2263	54.1236	25.4397
AAEL003740	0.657693	0.381718	1.69856
AAEL003742	61.683	8.71894	46.4397
AAEL003746	50.4749	27.5381	29.1213
AAEL003756	4.08624	7.8765	2.39773
AAEL003807	3.64394	4.32837	1.14946
AAEL003808	64.4537	72.8313	28.7831
AAEL003816	203.598	52.5477	313.388
AAEL003821	12.6079	2.61438	17.7804
AAEL003842	9.18175	5.67625	14.8839
AAEL003848	25.5271	1.14694	60.3975
AAEL003849	148.727	0	101.17
AAEL003857	53.7403	71.4357	154.394
AAEL003877	180.515	113.356	236.284
AAEL003883	3.69367	3.41634	6.84892
AAEL003884	7.08439	8.90521	3.41896
AAEL003889	2.63741	4.06942	1.33191
AAEL003893	1.82794	0.91554	2.5917
AAEL003898	3.92118	6.26675	2.61192
AAEL003903	86.6728	50.0775	79.3637
AAEL003929	6.23457	9.89811	4.62615
AAEL003937	1.78466	0.746738	2.00089
AAEL003970	133.211	85.9798	158.294
AAEL004003	0.350021	1.88072	0.0968386
AAEL004027	38.3422	74.8925	76.5596
AAEL004031	4.93715	13.3445	1.93972
AAEL004043	81.9942	51.1769	151.109
AAEL004092	60.6343	20.1376	17.3781
AAEL004126	5.39872	3.24796	1.91058
AAEL004127	14.269	10.3303	6.39912
AAEL004134	2.73157	0.247408	0
AAEL004165	0.123407	0.604725	0.371842
AAEL004173	0	3.46518	1.98688
AAEL004181	0.932856	2.72843	1.24355
AAEL004210	0.772549	0.05386	0.358481
AAEL004222	0.254993	0.34355	0.0551676
AAEL004239	40.0069	10.17	12.4953
AAEL004247	9.55005	21.7738	4.57724
AAEL004255	0.822431	1.63416	0.76117
AAEL004274	1.12177	2.16555	3.10306
AAEL004284	54.1372	133.432	65.1143
AAEL004285	9.39246	3.38403	10.1219
AAEL004291	6.42585	1.46055	3.45064
AAEL004308	37.6356	25.9395	48.1014
AAEL004310	0.334543	1.24063	3.97405
AAEL004313	40.8646	70.3153	27.7767
AAEL004335	243.168	217.527	629.437
AAEL004361	1.26619	1.68552	0.452422
AAEL004443	2.90387	0.135702	4.72909
AAEL004451	21.8661	25.4576	8.66293
AAEL004487	0.222112	1.39353	0.179175
AAEL004496	21.5552	34.4977	15.9178
AAEL004502	5.39319	0.870783	3.5838
AAEL004504	4.37651	3.43399	7.50386
AAEL004537	0.740994	4.26692	0.0433962
AAEL004542	7.00255	7.61459	3.61187
AAEL004547	1.39187	4.84812	1.80463
AAEL004582	446.212	189.26	497.367
AAEL004603	9.55102	3.23467	13.007
AAEL004613	8.87754	17.3315	8.79784
AAEL004646	57.884	124.707	45.8007
AAEL004647	0.387573	0.816291	0.0836876
AAEL004665	47.4579	90.2675	19.9118
AAEL004688	21.0079	38.7685	32.1517
AAEL004695	2.55045	0.0216219	0.570119
AAEL004710	2.81342	11.025	12.6358
AAEL004719	16.2496	5.7582	5.37824
AAEL004750	1.6585	8.92769	5.85553
AAEL004777	0.269185	0.110374	0.566332
AAEL004784	2.6247	3.45222	7.42735
AAEL004789	3.14504	0.304736	2.87474
AAEL004798	566.432	343.248	999.829
AAEL004809	5.99325	25.5064	7.71066
AAEL004827	1.91023	4.85746	1.72544
AAEL004848	0.684918	6.63346	5.93187
AAEL004853	16.11	9.04893	16.4336
AAEL004868	3.37364	8.52208	8.90562
AAEL004870	29.0217	9.39673	10.5314
AAEL004884	111.505	54.109	103.487
AAEL004922	4.09841	0.0959759	3.15824
AAEL004933	332.484	1.88998	96.7821
AAEL004964	0.500663	2.21428	1.78754
AAEL005000	15.5846	7.88324	14.9619
AAEL005030	3.85915	1.90206	4.76607
AAEL005048	12.0445	26.4606	19.6305
AAEL005052	13.1166	27.7765	15.4228
AAEL005077	21.862	37.1614	20.8277
AAEL005080	3.65406	3.60512	7.36868
AAEL005102	109.34	60.4367	91.2289
AAEL005109	0.0579539	0.301488	0.0607754
AAEL005113	2.47709	1.21492	0.884245
AAEL005114	12.8729	8.45672	18.1037
AAEL005123	2.85965	0.782615	1.66787
AAEL005134	1.88998	1.61229	0.482132
AAEL005158	0.56238	1.30907	2.51497
AAEL005173	49.1577	58.4758	36.5385
AAEL005188	1606.96	1060.57	570.344
AAEL005201	30.5114	13.1465	21.8291
AAEL005209	10.8883	8.73462	5.46957
AAEL005220	249.878	62.8732	377.23
AAEL005223	4.59823	2.10119	2.40719
AAEL005232	3.86433	1.5126	7.07858
AAEL005236	53.9855	17.6957	75.1296
AAEL005270	586.306	1055.75	653.59
AAEL005293	368.979	898.182	257.479
AAEL005315	18.6198	50.4914	19.5388
AAEL005316	0.467673	3.0672	1.72309
AAEL005330	0.505884	0.322519	0.0943623
AAEL005332	43.8317	83.4311	21.5721
AAEL005336	305.507	180.933	264.539
AAEL005342	22.2969	17.3546	12.1727
AAEL005353	5.57831	13.8847	6.45822
AAEL005354	8.06584	8.25032	1.57571
AAEL005356	13.9678	10.9169	6.9027
AAEL005365	4.63302	3.40232	1.25108
AAEL005428	51.2619	112.548	130.749
AAEL005429	44.3609	29.5884	17.2549
AAEL005466	2.35555	1.34029	0.0917036
AAEL005472	7.12638	13.9375	11.562
AAEL005505	8.71395	3.53424	9.4761
AAEL005543	14.8861	32.4245	28.8691
AAEL005552	29.7664	15.519	22.4216
AAEL005588	0.483393	0.130572	1.03927
AAEL005641	139.684	5.56889	118.181
AAEL005676	7.22592	15.8799	11.616
AAEL005690	1.03383	0.0316585	2.06196
AAEL005693	13.4012	0.171822	38.7514
AAEL005694	31.6074	31.476	7.42427
AAEL005697	0.683196	0.0508419	0.618651
AAEL005702	8.24166	0.904707	0.0557788
AAEL005707	1.06989	0.414653	1.89376
AAEL005763	979.536	561.152	412.987
AAEL005781	0.575584	0.566278	1.90296
AAEL005785	0.153459	0.0867131	0.716288
AAEL005795	13.8038	5.89307	12.8653
AAEL005797	5.10916	0.0689603	12.4254
AAEL005804	0.301841	0.046122	0.482853
AAEL005805	34.1518	18.1638	18.2309
AAEL005820	4.07107	0.507168	2.72302
AAEL005826	33.953	50.6815	23.806
AAEL005835	2.56037	0.522465	1.98251
AAEL005839	8.01177	18.3257	26.2408
AAEL005881	10.7944	21.3478	13.8887
AAEL005908	1.0848	2.46756	1.97979
AAEL005961	0.514601	3.76079	0.021629
AAEL005992	0.839107	3.27368	1.30522
AAEL006000	14.8324	39.3172	9.0573
AAEL006041	2.41837	2.3889	9.15184
AAEL006044	2.47625	0.990652	0.488245
AAEL006053	500.312	209.188	221.044
AAEL006085	12.8122	13.1305	7.64353
AAEL006090	54.5898	77.0757	39.8212
AAEL006095	16.3571	2.07123	20.6821
AAEL006109	0.383873	0	1.24307
AAEL006130	3.64144	0.750376	8.8649
AAEL006136	1.389	2.17226	0.68889
AAEL006178	2.44725	3.70785	1.64058
AAEL006181	43.5023	46.8538	23.8951
AAEL006190	17.2008	16.3106	6.11923
AAEL006216	1.58171	1.98686	0.953588
AAEL006220	1.91142	0.455383	3.39675
AAEL006262	1.12563	1.89942	0.616977
AAEL006267	6.07027	0.684256	5.54723
AAEL006276	1.31773	5.86861	2.38328
AAEL006285	12.2027	5.52362	12.8923
AAEL006291	3.34765	4.91499	2.65668
AAEL006314	1.7149	3.04473	1.48874
AAEL006318	10.7304	1.90056	5.31885
AAEL006321	8.89397	23.448	18.0231
AAEL006327	12.1432	7.17151	5.85908
AAEL006372	26.7779	38.3322	15.7332
AAEL006376	3.95165	0.984245	3.12624
AAEL006381	428.919	643.879	156.14
AAEL006384	6.37741	4.17149	14.6616
AAEL006389	16.3754	6.50864	26.9819
AAEL006425	1263.06	3833.62	2649.43
AAEL006433	14.3158	17.9909	10.5226
AAEL006467	13.1473	25.5327	2.77951
AAEL006480	30.2383	73.5198	83.8565
AAEL006483	277.768	195.371	87.2703
AAEL006486	5.28045	7.13248	3.7411
AAEL006493	9.90033	40.844	3.06404
AAEL006538	62.9032	28.846	29.5879
AAEL006569	5.63988	0.730151	5.05875
AAEL006577	16.7671	26.4217	16.2406
AAEL006580	3.00293	0.508037	1.21577
AAEL006594	3361.95	0.675598	4161.55
AAEL006598	77.5238	115.496	335.409
AAEL006620	1.53651	1.89706	0.634955
AAEL006621	1.46885	1.51044	3.66081
AAEL006627	56.4684	0.273278	0.122969
AAEL006630	24.7351	23.3508	13.1143
AAEL006639	1.12647	1.71589	0.372247
AAEL006643	4.50474	3.31562	1.14989
AAEL006657	1.49185	2.71799	0.339231
AAEL006664	15.3819	7.56038	12.4452
AAEL006667	27.0765	13.6543	23.0798
AAEL006676	141.873	75.9097	115.252
AAEL006691	36.1711	41.1761	21.4244
AAEL006702	243.125	298.113	94.7778
AAEL006704	326.29	1821.78	872
AAEL006706	0.150956	0.0280337	1.05856
AAEL006708	6.9632	16.9215	15.4162
AAEL006718	3.85809	10.4168	4.83568
AAEL006723	0.478509	0.921629	2.45871
AAEL006784	2.09249	1.20896	3.86929
AAEL006793	158.752	137.464	389.944
AAEL006798	46.6654	32.2723	71.4501
AAEL006802	5.58905	2.26958	10.7594
AAEL006805	19.6504	26.3601	52.362
AAEL006851	40.7028	0.117833	4.88109
AAEL006902	567.304	1149.57	569.325
AAEL006903	159.301	3.499	245.75
AAEL006904	19.4359	42.112	25.3433
AAEL006921	1.23314	5.26283	2.80059
AAEL006961	1.75589	3.75545	1.48776
AAEL006978	5.72107	12.4373	3.34832
AAEL006979	0.667362	2.21554	0
AAEL006987	2.03736	0.851867	3.68905
AAEL007024	26.9803	13.1866	14.099
AAEL007032	1.14748	5.42998	1.66173
AAEL007052	2.00732	1.43362	0.45298
AAEL007063	64.8591	11.6182	82.6175
AAEL007069	1.04087	0.457031	1.771
AAEL007080	83.9743	41.2759	69.511
AAEL007083	7.69031	5.48413	10.9608
AAEL007090	315.606	373.543	223.172
AAEL007109	0.242127	0.795109	1.36919
AAEL007120	0.263714	0.56652	0.0369838
AAEL007124	1.79362	0.331823	2.49703
AAEL007128	0.372372	3.48926	0.0577314
AAEL007155	1.07351	0.0763164	0.941005
AAEL007191	128.379	70.7641	97.4853
AAEL007201	171.499	121.71	84.2264
AAEL007243	3.08763	1.11983	3.47632
AAEL007254	1.32756	4.9555	2.30533
AAEL007271	89.6087	42.7149	54.7743
AAEL007298	84.3273	128.082	60.2093
AAEL007324	1.69973	3.47598	1.29204
AAEL007326	6.6133	2.35351	7.44781
AAEL007330	0.768165	0.274261	0.916815
AAEL007342	222.949	410.578	277.486
AAEL007344	51.8005	321.877	230.939
AAEL007349	61.5453	175.576	108.848
AAEL007363	1.11127	1.76546	0.63877
AAEL007387	3.53734	7.4202	5.39782
AAEL007390	23.3298	52.7289	38.9513
AAEL007432	4107.15	2775.21	1571.32
AAEL007450	4.29258	10.9462	8.43653
AAEL007455	0.235301	0.266692	0.0182277
AAEL007503	1.01081	0.719422	1.49923
AAEL007537	7.94886	6.03814	14.5315
AAEL007542	0.0709414	0.752173	0.343994
AAEL007585	154.682	8.2504	608.942
AAEL007601	70.13	123.972	40.2027
AAEL007635	1.56703	1.56468	0.0222709
AAEL007650	11.6818	25.2178	13.8734
AAEL007653	0.808645	2.92582	0.623461
AAEL007669	45.52	9.13061	6.55679
AAEL007693	11.2692	22.3058	21.1081
AAEL007716	0.299318	1.27347	0.284345
AAEL007732	2.42919	0.361189	1.9707
AAEL007749	1.61485	0.686379	2.87514
AAEL007787	33.1641	36.2341	22.458
AAEL007800	1.26814	3.42383	1.24598
AAEL007804	8.97775	10.5687	5.07836
AAEL007807	39.5263	7.70256	16.2515
AAEL007808	0.577188	0.332288	1.70523
AAEL007811	1.36845	3.62174	1.34841
AAEL007815	21.1944	11.5807	38.3403
AAEL007816	369.871	428.665	241.871
AAEL007828	4.01826	7.84164	2.10895
AAEL007842	2.58436	1.40601	3.55236
AAEL007872	13.939	1.08177	3.33408
AAEL007876	0.411682	0.158367	0.771857
AAEL007880	1052.58	2620.05	2731.27
AAEL007898	4.13888	7.53141	4.34267
AAEL007931	2.95606	1.4249	1.55853
AAEL007935	1.85472	1.23846	3.20858
AAEL007938	2.89171	6.35579	10.7191
AAEL007940	1.62581	0.593692	2.6117
AAEL007948	22.4601	18.4052	60.0184
AAEL007951	34.9704	35.8053	71.9778
AAEL007967	1.63812	1.03281	2.28211
AAEL008006	471.209	919.246	540.219
AAEL008007	0.865875	2.63349	0.996529
AAEL008016	8.6695	22.1004	10.0441
AAEL008028	38.9779	15.3832	26.958
AAEL008050	1.35519	9.20625	1.48023
AAEL008085	519.388	0.0153766	392.848
AAEL008093	121.682	0.0442057	165.276
AAEL008097	76.6785	259.319	95.8644
AAEL008106	5.5023	18.6191	2.12578
AAEL008134	101.778	69.5571	52.9934
AAEL008138	0.96154	0.96391	2.30124
AAEL008139	17.8455	3.0623	18.8812
AAEL008140	0.685065	0.0938971	1.46819
AAEL008153	14.8293	11.8089	0.509559
AAEL008157	20.5927	14.123	10.3259
AAEL008162	0.431234	0.145478	0.649937
AAEL008163	100.818	78.2033	28.998
AAEL008167	22.5293	15.1624	10.9763
AAEL008176	119.983	57.249	11.1039
AAEL008223	3.99741	4.51761	11.2754
AAEL008226	0.776901	0.449077	1.22091
AAEL008232	28.7315	6.09719	59.0725
AAEL008243	4.12813	6.35178	2.47017
AAEL008280	13.3215	23.4678	2.04961
AAEL008302	3.83047	1.09871	3.88793
AAEL008330	84.463	37.185	43.3299
AAEL008343	4.06245	10.1184	4.40453
AAEL008347	2.49389	8.98508	3.56971
AAEL008359	0.904777	3.00926	6.09432
AAEL008385	2.68341	2.80025	0.491757
AAEL008386	24.1706	15.1801	11.4209
AAEL008387	0.479395	1.47706	1.19012
AAEL008404	0.206992	0.509908	0.0118442
AAEL008406	14.5068	5.11513	19.5048
AAEL008409	0.215474	0.259912	3.93037
AAEL008424	14.3212	49.7783	11.121
AAEL008428	0.469826	0.734811	0.134143
AAEL008430	1193.27	3091.99	823.869
AAEL008444	4531.65	9506.17	5652.84
AAEL008483	0.633889	0.513397	1.44005
AAEL008506	1.52777	4.10157	1.85208
AAEL008514	28.5064	15.0979	19.2975
AAEL008532	0.484279	1.2203	0.279013
AAEL008555	1.31857	1.03937	2.94489
AAEL008567	63.2607	234.979	399.751
AAEL008599	31.8643	57.4958	23.123
AAEL008609	298.952	153.886	146.24
AAEL008638	1.11042	4.0977	2.28163
AAEL008651	6.99536	31.8809	15.5305
AAEL008656	28.3995	27.7687	15.7899
AAEL008663	25.024	22.6012	11.6512
AAEL008699	0.462774	0.324518	0.0308585
AAEL008708	0.648753	0.103264	0.0238409
AAEL008710	15.5403	57.7268	42.0495
AAEL008742	64.2801	37.8459	40.7987
AAEL008760	27.5777	10.7076	13.759
AAEL008780	263.351	697.891	769.77
AAEL008781	593.18	2332.66	974.379
AAEL008782	19.6592	75.2336	74.2879
AAEL008787	268.716	263.81	159.345
AAEL008841	65.3009	39.0538	73.3231
AAEL008861	0.172388	0.499507	10.7363
AAEL008878	137.752	70.2956	131.997
AAEL008879	80.6039	148.521	107.425
AAEL008907	0.314998	0	0.505544
AAEL008910	0.414009	0.0202279	1.09848
AAEL008923	0.915584	0.0642836	2.41726
AAEL008931	8.92108	15.6264	6.96787
AAEL009021	0.921994	0	0
AAEL009029	94.0844	54.205	78.4858
AAEL009036	0.4039	7.898	0.410887
AAEL009044	6.39304	2.87481	2.49617
AAEL009100	18.0628	15.1804	32.1652
AAEL009111	4.52311	1.35451	3.38628
AAEL009124	6.16395	21.5642	17.7178
AAEL009125	66.0968	138.75	85.4985
AAEL009129	267.615	94.7839	159.496
AAEL009159	2.18769	2.59273	0.929799
AAEL009166	1234.59	0	0.0660422
AAEL009183	34.7315	75.6423	50.285
AAEL009219	21.0407	69.2596	37.9996
AAEL009239	7.32254	15.4105	11.1039
AAEL009323	112.804	25.7641	176.194
AAEL009324	11.4692	9.86916	23.601
AAEL009328	1.74546	0.484335	6.44881
AAEL009335	0.526281	3.30651	1.88774
AAEL009350	0.419167	0.24596	1.29705
AAEL009363	6.21904	0.589319	1.77209
AAEL009370	1.20384	0.0546152	0.397665
AAEL009414	27.4747	34.6887	20.4697
AAEL009436	1.94002	6.09093	3.4628
AAEL009441	0.314237	3.05902	1.41636
AAEL009448	1.70561	0.584832	2.39503
AAEL009457	0.339167	0.761195	0.121072
AAEL009468	18.2386	45.0209	16.3503
AAEL009476	51.743	82.3419	46.2727
AAEL009522	0.208259	0.350369	1.10906
AAEL009536	14.0368	3.99312	14.8381
AAEL009556	44.1777	379.213	81.4085
AAEL009561	14.0226	46.693	19.0609
AAEL009574	13.6542	53.8324	25.248
AAEL009596	7.83779	5.57673	3.79897
AAEL009625	122.788	77.7455	143.058
AAEL009626	3.31759	4.17128	1.03626
AAEL009629	2.24702	5.98757	1.23658
AAEL009651	25.7103	51.2677	34.2101
AAEL009713	1.11423	0.140327	4.64457
AAEL009715	2.7182	10.5132	8.67035
AAEL009719	17.9657	12.5122	24.8411
AAEL009721	5.27105	8.16348	4.06703
AAEL009730	0.933708	3.13241	1.35554
AAEL009736	6.03305	5.20026	2.23556
AAEL009745	0.100764	0.815686	0.191578
AAEL009762	5.18358	6.25194	15.8347
AAEL009764	238.331	218.597	128.24
AAEL009840	9.82808	37.3525	5.43708
AAEL009842	169.402	160.276	90.6301
AAEL009843	693.948	333.498	831.429
AAEL009844	98.5139	138.707	20.6267
AAEL009848	0.395077	0.867671	0.144112
AAEL009850	3.25604	14.1908	8.31591
AAEL009853	13.7994	13.5434	5.02405
AAEL009855	25.9766	8.45564	15.9355
AAEL009856	3.83443	0.767592	2.73827
AAEL009872	178.495	93.1297	104.74
AAEL009935	16.9833	9.0145	11.2043
AAEL009936	0.839801	0.262001	1.1216
AAEL009938	8.02394	2.9985	4.26534
AAEL009948	12.3821	20.2869	9.75473
AAEL009952	0.716479	1.715	0.488941
AAEL009965	0.788504	6.15476	1.97124
AAEL009968	54.0075	15.5647	25.5903
AAEL009979	1.10355	0	4.18865
AAEL009985	13595.4	38613.6	17515.5
AAEL010019	2.11255	3.33372	0.908857
AAEL010030	0.308179	1.97475	0.836991
AAEL010038	0.631586	6.35848	2.101
AAEL010072	0.125235	0.110813	1.33445
AAEL010109	28.9367	16.644	23.8775
AAEL010137	127.674	0	182.851
AAEL010139	1.24707	7.76172	0.813541
AAEL010145	77.3117	165.799	66.8665
AAEL010146	35.9319	17.3417	34.7476
AAEL010195	301.787	1.2265	5.63237
AAEL010198	11.0055	1.637	7.30136
AAEL010199	0.834597	2.02082	2.83172
AAEL010202	4623.75	20.9291	6514.52
AAEL010203	597.798	21.8912	724.709
AAEL010206	0.9804	1.17641	0.234892
AAEL010227	10.9115	23.958	15.4246
AAEL010251	2.09634	0.380348	0.443255
AAEL010266	2.49891	6.93657	0.877286
AAEL010276	3.13215	12.3142	1.18487
AAEL010285	1.14512	0	0.146501
AAEL010288	0.452905	0	0.0345976
AAEL010293	3.31337	4.73216	1.89325
AAEL010295	1.79626	1.01969	3.79398
AAEL010328	1.66552	2.4662	1.21167
AAEL010358	5.30624	13.3189	4.55488
AAEL010360	6.79445	16.9412	9.70979
AAEL010372	29.1173	34.4316	17.6339
AAEL010394	11.776	0	5.6978
AAEL010399	14.6629	0.047739	5.30514
AAEL010400	24.2985	3.17988	10.7981
AAEL010403	25.1128	45.7938	39.6434
AAEL010405	19.4753	31.0991	14.7629
AAEL010435	2645.13	1590.1	1429.78
AAEL010437	2.7855	1.64083	4.39348
AAEL010438	1.38436	0.82061	3.39774
AAEL010452	0.0646992	0.015446	0.732989
AAEL010453	5.33313	9.29638	3.17758
AAEL010482	13.9876	14.0998	6.10962
AAEL010485	59.075	110.27	29.4769
AAEL010514	0.959329	0	0
AAEL010548	3.6709	1.09528	3.42593
AAEL010549	3.28534	0.707106	1.8641
AAEL010553	9.53448	3.06237	8.55524
AAEL010571	1.44616	0.994349	4.01629
AAEL010573	221.893	40.8381	420.509
AAEL010587	0.412489	0.123362	0.547597
AAEL010590	22.2788	21.5079	12.3819
AAEL010592	2.91959	1.83124	4.71775
AAEL010595	0.345001	0.0661844	0.733639
AAEL010599	21.0379	22.749	10.9996
AAEL010600	0.0529751	0	0.582122
AAEL010629	0.906188	0.032464	0.449533
AAEL010652	24.4432	71.4523	74.6139
AAEL010668	15.1159	42.1615	46.1786
AAEL010675	18.7695	61.0506	63.2864
AAEL010678	4.8545	6.14309	1.36341
AAEL010696	6.43675	7.29112	3.42101
AAEL010697	71.8742	43.7321	97.9098
AAEL010707	0	0.578811	0.0395077
AAEL010726	0.187313	0.415571	1.53183
AAEL010775	44.6989	16.8584	48.6607
AAEL010776	1130.93	917.881	412.587
AAEL010785	0.0594665	1.24119	0.138201
AAEL010822	5.16782	9.36868	2.13812
AAEL010823	88.5659	94.8905	58.8518
AAEL010838	4.08146	8.62314	3.80952
AAEL010871	2.37046	0.930164	2.14558
AAEL010873	3.35778	2.44333	0.443772
AAEL010883	3.2676	5.72861	3.16172
AAEL010895	12.1884	9.48953	18.7444
AAEL010920	2440.91	1334.93	3080.99
AAEL010936	18.1553	30.2748	9.12961
AAEL010938	22.2275	11.4453	18.856
AAEL010960	0.660382	1.74151	2.25188
AAEL010965	0.180316	0.185134	0.0258857
AAEL010984	0.837493	3.44385	4.04926
AAEL010986	103.929	45.8697	62.8672
AAEL010989	30.6654	29.6224	7.85686
AAEL010991	93.5265	48.4074	37.939
AAEL011001	0.333194	0.0670529	0.564223
AAEL011009	4.43961	7.41887	3.0208
AAEL011058	0.579185	4.5011	2.47839
AAEL011059	2.10856	7.00919	3.91046
AAEL011062	1.7615	4.97018	3.8059
AAEL011112	6.03028	4.45478	9.02038
AAEL011129	4.51007	2.01352	8.38799
AAEL011148	7.42001	1.37735	8.0925
AAEL011168	2.8139	0.603967	1.38828
AAEL011176	99.0743	107.887	53.3515
AAEL011187	3.19871	5.56416	2.3868
AAEL011189	1.10718	0	1.94562
AAEL011190	3.78623	0.817585	4.73753
AAEL011203	6.62425	13.1172	11.0639
AAEL011206	37.9331	28.1366	21.2137
AAEL011242	7.23509	17.7018	11.8675
AAEL011264	231.665	101.726	322.281
AAEL011298	56.9201	0.441981	0
AAEL011334	42.4507	142.617	77.2429
AAEL011336	0.143926	4.04565	1.64551
AAEL011341	105.304	47.7963	64.3643
AAEL011349	1.34613	0.310572	0.908899
AAEL011378	0.57181	0.200965	1.28955
AAEL011387	3.44492	1.75636	4.83464
AAEL011394	9.08808	10.5936	19.8924
AAEL011426	2.45088	0.844622	0
AAEL011460	0.0844894	0.515099	0.0270627
AAEL011468	59.8066	106.394	41.8251
AAEL011476	4.18743	2.33532	8.26349
AAEL011496	1.439	0.928171	4.69934
AAEL011510	88.2341	188.713	116.074
AAEL011516	0.178804	0.171719	0.860732
AAEL011519	1.08006	3.05333	1.86999
AAEL011520	223.916	503.017	280.805
AAEL011542	195.597	301.271	82.2869
AAEL011544	1.27016	0.094614	3.13397
AAEL011587	154.362	368.444	24.704
AAEL011598	52.3156	29.6418	60.9361
AAEL011658	11.2405	3.21602	6.89286
AAEL011662	301.579	119.477	284.528
AAEL011668	4.33875	8.86776	1.93841
AAEL011678	4.43759	5.5745	2.56815
AAEL011699	1.24437	0.153411	1.83602
AAEL011708	4.14572	0.753949	2.41239
AAEL011714	0.814982	0.134653	0.594849
AAEL011724	2.93454	4.32114	1.9544
AAEL011739	12.2396	7.80801	17.3793
AAEL011753	3.12843	2.57261	5.65256
AAEL011756	442.972	239.04	334.292
AAEL011773	94.1414	110.509	63.8905
AAEL011803	24.4662	48.1201	22.7601
AAEL011820	0.797247	2.8047	0.792783
AAEL011822	2.27309	0.570947	2.38052
AAEL011831	8.97016	2.97821	7.49362
AAEL011838	0.495554	0.108858	0.93386
AAEL011882	0.287005	0.504827	2.14009
AAEL011892	11.1892	10.3711	20.607
AAEL011901	11.5164	3.45994	7.53597
AAEL011918	15.6355	8.44741	18.7715
AAEL011921	0.655587	0.289352	1.30804
AAEL011928	5.49965	5.7978	1.67324
AAEL011934	13.359	11.6681	3.58319
AAEL011937	27.8802	15.5388	24.4794
AAEL011962	19.5251	51.7742	18.813
AAEL011989	66.3017	74.3635	38.6838
AAEL011999	48.7859	18.1986	137.862
AAEL012001	22.5497	0.206293	0
AAEL012005	1.00403	0	3.78226
AAEL012007	2.06454	0	0.0114431
AAEL012008	0.466878	0.0224101	0
AAEL012010	10.5273	6.52529	14.1717
AAEL012014	21.7351	63.3394	35.7241
AAEL012017	11.9781	50.452	12.6852
AAEL012086	2.85393	16.0695	2.2122
AAEL012097	0.414687	0.0248558	2.14093
AAEL012099	27.799	53.039	35.4678
AAEL012131	45.2492	24.3798	69.4983
AAEL012133	16.9912	27.6319	14.3338
AAEL012138	3.37055	1.55518	7.43109
AAEL012159	1.16176	0.0184918	1.02969
AAEL012179	0.0386501	0.620501	1.00409
AAEL012196	0.448227	0.188271	1.8428
AAEL012200	54.8509	20.1585	67.5449
AAEL012206	6.3939	3.54844	15.7971
AAEL012224	3.06339	1.19084	4.04828
AAEL012251	6.25426	7.62109	4.46492
AAEL012266	77.6129	57.0368	101.381
AAEL012269	1.949	0.168345	2.24494
AAEL012271	26.9555	1.6042	18.8125
AAEL012275	0.529848	0.0547777	0.616686
AAEL012278	4.12561	1.52637	3.41314
AAEL012298	1.40842	0.254179	1.51081
AAEL012302	4.50209	0	3.68298
AAEL012313	22.2573	45.8041	33.466
AAEL012316	1.83379	0	0
AAEL012340	4.90763	51.4197	0.153417
AAEL012348	0.798152	1.26056	0.121118
AAEL012351	90.8164	49.2021	42.3205
AAEL012357	1.15924	4.8048	1.11704
AAEL012364	27.315	68.6618	45.6093
AAEL012382	438.151	175.458	330.208
AAEL012390	16.5915	33.2779	21.7131
AAEL012395	2.34507	4.29379	6.20767
AAEL012398	31.7227	72.8211	56.0101
AAEL012412	0.0506738	0.477902	0.0576378
AAEL012415	4.55594	0	0
AAEL012443	12.2009	8.35251	6.23595
AAEL012457	34.1439	62.1637	34.0654
AAEL012480	6.69924	9.24852	4.21767
AAEL012483	5.7867	0.645154	4.95688
AAEL012493	3.49819	2.14135	1.68378
AAEL012494	8.60081	2.11512	2.79402
AAEL012504	55.1752	27.7032	36.2037
AAEL012522	0.45998	1.57011	1.50052
AAEL012528	15.2693	7.29629	27.2981
AAEL012532	279.851	98.5285	526.807
AAEL012535	0.627036	0.0229923	0.99489
AAEL012536	3.91235	2.40718	1.90041
AAEL012554	9.2191	28.159	10.4619
AAEL012567	0.243765	1.66637	0.0102986
AAEL012579	37.6145	36.8891	16.9281
AAEL012581	5.20634	3.5917	1.5735
AAEL012600	10.3135	15.6762	9.01604
AAEL012605	1.11732	4.8722	1.42323
AAEL012636	47.7413	74.4123	123.773
AAEL012646	0.807634	6.92393	0.0668347
AAEL012661	38.0732	93.2163	80.7823
AAEL012666	8.55517	2.44245	4.17108
AAEL012669	0.450192	0.246299	0
AAEL012670	2.16231	0.272727	1.29892
AAEL012674	37.8068	17.5033	29.7744
AAEL012678	0.653427	3.121	0.228943
AAEL012684	167.72	200.219	119.305
AAEL012687	8.43055	15.7927	1.2347
AAEL012697	489.712	256.219	837.365
AAEL012703	1.66616	1.3627	4.8713
AAEL012704	24.6038	16.785	35.9534
AAEL012705	11.1955	15.0848	9.19719
AAEL012707	2.12125	2.80771	1.11543
AAEL012716	1.76505	4.95759	1.47912
AAEL012719	2.92533	10.3459	2.54544
AAEL012722	0.121496	0.843638	0.0341816
AAEL012752	3.26686	3.78686	1.40101
AAEL012757	23.4329	10.6744	32.5467
AAEL012759	0.822357	2.98483	0.621349
AAEL012774	2.6798	3.28537	0.48415
AAEL012776	691.762	407.327	260.297
AAEL012783	985.258	1069.86	434.276
AAEL012786	788.845	758.612	368.486
AAEL012807	5.79339	0.702701	12.883
AAEL012808	0.736169	0.207172	1.54869
AAEL012811	0.63156	0.0187637	1.21691
AAEL012813	5.37509	10.8592	3.37137
AAEL012821	3.6747	9.60126	5.63239
AAEL012823	1.20294	4.23573	1.57078
AAEL012832	12.5708	24.3683	23.1376
AAEL012833	9.28304	15.9567	8.88876
AAEL012859	22.6274	47.2716	63.3308
AAEL012863	14.3936	29.284	14.3582
AAEL012866	276.752	413.991	58.1574
AAEL012867	23.8368	47.8765	12.3309
AAEL012884	2.32601	1.56736	3.59597
AAEL012891	0.496488	5.23045	6.92063
AAEL012896	5.72209	14.8188	20.3921
AAEL012897	32.2876	4.72239	32.8474
AAEL012931	43.4947	20.297	24.4252
AAEL012936	8.48526	7.57008	3.8692
AAEL012939	16.1894	32.0981	32.2584
AAEL012941	7.39142	8.87901	1.19853
AAEL012947	0.0269239	0	0.341651
AAEL012956	0.837369	0.0552273	0.321783
AAEL012965	4.93714	6.0458	2.54489
AAEL012967	9.13358	1.90546	9.10648
AAEL012970	3.27515	0.700241	6.26514
AAEL012975	8.13737	30.7021	8.85078
AAEL013009	148.14	0.674321	24.175
AAEL013017	4.16047	8.71414	4.01904
AAEL013020	4.51382	2.32408	1.62505
AAEL013047	85.4827	159.07	78.063
AAEL013050	4.10457	3.64241	7.35075
AAEL013052	7.58149	20.5694	6.93558
AAEL013058	3.41591	5.16198	1.68375
AAEL013063	126.347	59.6602	105.237
AAEL013065	5.68085	2.79894	5.5222
AAEL013078	6.24241	7.89819	3.55791
AAEL013089	16.8915	9.98611	22.7132
AAEL013094	9.51055	2.69997	7.45696
AAEL013095	5.02843	1.10799	6.33946
AAEL013097	475.717	18.3919	830.6
AAEL013098	5.02606	1.23154	5.22799
AAEL013099	0.85222	0.0182751	1.14701
AAEL013109	8.21446	22.3684	3.1882
AAEL013111	7.03826	23.7048	7.95191
AAEL013133	55.528	63.6193	30.9099
AAEL013135	9.51403	4.19823	8.9637
AAEL013138	77.1756	93.2851	58.158
AAEL013158	129.54	41.364	231.75
AAEL013184	16.1189	23.6133	8.33272
AAEL013187	0.00762492	0.343318	0.00742365
AAEL013212	1.93419	8.98844	3.69837
AAEL013214	64.5295	75.4152	45.9559
AAEL013223	2.91363	0	2.10593
AAEL013224	6.33427	0	6.14998
AAEL013262	7.9495	46.9049	14.7868
AAEL013267	13.2788	27.119	26.5088
AAEL013279	254.056	137.135	205.701
AAEL013293	3.4933	2.8337	6.5219
AAEL013304	205.503	122.58	166.458
AAEL013335	6.71897	12.5066	6.73465
AAEL013338	68.7642	34.4036	288.922
AAEL013341	9.90251	5.7763	21.3555
AAEL013344	0.1641	0.0374355	2.58613
AAEL013345	0	0.0417222	8.74517
AAEL013346	0	0	11.2858
AAEL013349	0.157974	0.816629	19.5632
AAEL013350	0.234378	1.20747	42.3638
AAEL013352	0.102837	0.175518	2.61783
AAEL013381	0.787005	4.27849	3.32326
AAEL013438	18.5673	11.3788	2.91741
AAEL013450	4.87979	0.0349131	1.72945
AAEL013454	1.12554	0.062498	1.91284
AAEL013457	7.87502	0.356829	22.6325
AAEL013458	16.5086	30.3518	38.6024
AAEL013468	6.5315	3.3137	6.83134
AAEL013521	5.47752	6.91809	3.61418
AAEL013529	1.27947	2.33295	0.618334
AAEL013546	1.79918	1.42991	2.8608
AAEL013554	67.943	28.2525	50.1169
AAEL013560	1.19856	4.47016	2.90966
AAEL013567	6.61054	1.73138	5.00462
AAEL013574	10.3896	26.1081	34.4156
AAEL013577	23633.7	14717.5	13511.8
AAEL013578	1.16384	0.0105329	1.39597
AAEL013583	333.472	642.922	248.414
AAEL013584	3669.83	597.335	2341.54
AAEL013591	1.59956	0.0257056	2.45007
AAEL013593	1.0522	3.60152	2.27907
AAEL013594	1.55642	0.12988	1.39065
AAEL013597	0.83488	0.129543	1.33415
AAEL013602	0.101313	0.0325649	0.294794
AAEL013612	0.12884	0.603044	0.0612835
AAEL013623	379.5	279.502	129.545
AAEL013624	0.561118	0.090131	0.484709
AAEL013626	0.503148	0.0156179	0.586545
AAEL013627	0.672165	0.56972	1.8787
AAEL013628	436.022	342.514	185.996
AAEL013629	344.894	607.87	307.162
AAEL013631	1.98948	0.130313	2.23935
AAEL013639	2.35057	0.462245	3.02078
AAEL013640	3.47302	0.543961	2.35771
AAEL013643	2.64478	0.359307	2.75214
AAEL013648	3.02286	0.35696	2.91721
AAEL013658	1.21583	0	3.18777
AAEL013676	15.1805	5.49368	25.0695
AAEL013679	2.55399	1.14667	5.23453
AAEL013689	12.433	26.3915	24.0934
AAEL013696	3.19921	0	2.05392
AAEL013698	0.827638	0.615773	2.07625
AAEL013699	7.0056	3.34483	13.0729
AAEL013703	214.843	289.034	67.1348
AAEL013709	65.4317	144.549	34.026
AAEL013716	6.07541	1.68273	1.62208
AAEL013717	2496.03	868.335	2039.01
AAEL013767	7.25832	10.9087	6.03839
AAEL013768	20.9436	11.4628	25.3316
AAEL013774	972.259	3000.94	1548.78
AAEL013775	2472.42	8059.25	3820.28
AAEL013788	7.8396	10.9902	4.86846
AAEL013798	22.5249	9.63461	15.1917
AAEL013812	7.34387	18.2386	3.00746
AAEL013833	9.8611	1.01313	9.83162
AAEL013841	3.37699	1.77625	4.43237
AAEL013843	4.81896	1.48729	5.70356
AAEL013850	0.671151	1.57927	0.276657
AAEL013859	4.23673	0.862866	3.40448
AAEL013873	0.59548	0	2.06987
AAEL013875	159.81	293.47	234.025
AAEL013885	780.808	715.325	2497.91
AAEL013895	1.09102	0.318993	1.56576
AAEL013899	814.003	719.031	349.403
AAEL013909	4.45757	1.83043	8.23795
AAEL013943	1.04669	0.185061	0.736924
AAEL013944	0	3.35197	1.80915
AAEL013952	2.50528	1.20759	5.06138
AAEL013975	0.510118	2.06333	1.59196
AAEL013996	1.55722	7.36122	3.67055
AAEL014005	1.73723	2.0164	0.160835
AAEL014018	11.6562	12.9101	5.02025
AAEL014022	13.5738	23.0108	11.2866
AAEL014045	5.58768	4.63845	1.88282
AAEL014052	7.10222	12.0577	4.22563
AAEL014056	18.3299	17.1544	3.74362
AAEL014066	1.08685	2.32419	0.462111
AAEL014071	1.537	1.9292	0.769423
AAEL014077	25.651	49.4858	10.7511
AAEL014078	1.05925	3.86445	0.0761295
AAEL014085	0.0826775	0.169691	3.02022
AAEL014094	5.13658	17.5251	8.48143
AAEL014106	1.56133	4.90537	3.27257
AAEL014107	8.47618	24.6745	6.7121
AAEL014128	1.07641	6.13864	8.15599
AAEL014154	7.37205	15.7166	9.17405
AAEL014165	1.58888	0.110873	1.88429
AAEL014188	1819.63	5449.47	23969.7
AAEL014198	10.8686	0.924765	10.576
AAEL014201	3.10758	0.259962	3.05529
AAEL014206	4.43926	1.14199	4.94451
AAEL014215	4.0938	0.451461	2.81902
AAEL014217	3.98397	8.92157	5.79663
AAEL014252	9.78736	2.55432	5.50817
AAEL014256	1.3537	0.401499	0.86895
AAEL014266	3.0174	1.91838	7.15992
AAEL014271	7.57785	7.4495	2.86098
AAEL014279	0.878578	0	0.817869
AAEL014319	19.7599	33.9453	19.4488
AAEL014321	97.6896	123.049	46.1373
AAEL014348	13.4218	35.73	35.9708
AAEL014353	0.711913	1.7921	0.196876
AAEL014360	1.25986	0.6029	2.45509
AAEL014381	0.937412	0.464361	1.89091
AAEL014388	0.741797	0.147103	1.39172
AAEL014389	0.734287	0.276538	1.82119
AAEL014396	8.11928	12.4425	5.5017
AAEL014412	50.3338	19.3323	16.6423
AAEL014413	10.7546	5.02643	6.40196
AAEL014433	0.514673	0.125958	0.917075
AAEL014436	5.10642	12.4152	2.97145
AAEL014439	7.66547	5.73413	1.39034
AAEL014452	16.0803	31.6742	19.2243
AAEL014493	11.8268	15.9455	6.18332
AAEL014498	1.22106	0.0554753	2.27316
AAEL014500	2.48678	0.598412	3.32952
AAEL014512	2.66955	1.26635	2.51902
AAEL014516	22.2223	0.228434	1.74826
AAEL014531	1.32556	0.581003	2.08997
AAEL014533	1.48283	0.586513	2.02766
AAEL014535	0.830833	0	2.11666
AAEL014539	0.175775	0.361227	3.94819
AAEL014541	17.5553	3.31812	68.0426
AAEL014545	2.14626	0.671195	2.13808
AAEL014548	93.4951	100.114	60.2183
AAEL014558	12.018	4.93743	8.44579
AAEL014573	9.96763	10.8382	5.97845
AAEL014584	0.715077	0.0115384	0.357653
AAEL014598	27.9477	43.8914	24.8339
AAEL014600	4.81083	12.225	0.683768
AAEL014608	5.52338	6.57357	2.93751
AAEL014611	17.1003	7.9861	22.0317
AAEL014612	0.512848	0.748547	0.0201817
AAEL014619	1.10536	0.882495	0.0803367
AAEL014625	8.80984	10.2451	4.31461
AAEL014639	1.54955	1.43408	27.8754
AAEL014640	112.015	46.7968	49.2584
AAEL014663	4.0214	0.713599	4.55789
AAEL014664	7.62993	4.49992	8.86091
AAEL014665	0.706561	0.443708	1.34346
AAEL014671	20.4157	10.0781	0
AAEL014673	19.661	29.444	14.4753
AAEL014689	26.4149	91.255	13.0014
AAEL014713	1.84242	1.37906	4.61047
AAEL014721	3.30448	5.31705	1.60851
AAEL014723	41.8879	64.1574	24.9552
AAEL014741	3.47393	2.31886	1.18713
AAEL014742	5.10449	2.85851	1.72415
AAEL014755	0.631929	2.08186	0.537354
AAEL014762	530.206	254.286	615.039
AAEL014796	0.616611	0	0.363349
AAEL014797	34.2157	0	20.7806
AAEL014815	0.297541	0.00716938	0.895499
AAEL014817	0.0712837	0	0.566653
AAEL014840	3.86212	4.50386	0.813809
AAEL014865	1.89141	0.368586	2.72063
AAEL014889	15.6935	0	14.1342
AAEL014890	17.6792	4.50245	22.1227
AAEL014901	8.05284	18.3632	9.78682
AAEL014906	2.8994	8.75862	4.70173
AAEL014914	0.252912	1.20012	0.116767
AAEL014921	70.2428	147.663	131.974
AAEL014931	9.81079	18.715	14.9019
AAEL014935	122.368	54.6378	164.361
AAEL014938	2.91002	4.39111	9.43508
AAEL014955	3.69123	11.123	18.3025
AAEL014956	1.7459	1.47843	10.4332
AAEL015006	96.6913	40.5412	167.304
AAEL015010	4.53603	5.90032	2.65339
AAEL015020	5.48851	2.17117	2.33487
AAEL015022	0.87937	0.212664	0.100501
AAEL015036	151.794	120.71	219.26
AAEL015038	8.46015	0.31464	22.6397
AAEL015039	1.41559	0.40376	2.09592
AAEL015046	1.3272	0.607733	1.72492
AAEL015049	12.7795	6.057	15.1956
AAEL015051	0.896873	0.356283	2.26031
AAEL015052	3.46439	1.42283	5.84443
AAEL015067	0.23526	0.077441	0.523973
AAEL015077	5.39891	3.09664	8.5099
AAEL015085	0	0	8.23884
AAEL015087	0	0	1.14851
AAEL015090	3.91537	8.16936	3.28457
AAEL015103	2.52814	0.36145	2.49601
AAEL015107	1.98936	5.83869	3.33293
AAEL015123	0.265293	1.20426	0.721009
AAEL015138	2.87371	0	0
AAEL015140	1.3687	4.43029	0.589954
AAEL015145	5.17669	7.9861	2.9224
AAEL015171	2.06542	0.0353624	2.86717
AAEL015246	0.659224	1.87342	0.0595018
AAEL015260	84.6394	0.184531	16.769
AAEL015263	7.37348	12.8175	7.17162
AAEL015272	6.30549	0	14.1138
AAEL015287	1.52626	8.71176	1.36713
AAEL015291	2.28064	0	0.766496
AAEL015298	0.441069	0	1.95343
AAEL015304	35.766	56.7418	27.54
AAEL015309	5.3926	11.7637	7.30986
AAEL015337	14.9629	10.6553	30.6209
AAEL015338	3.38701	4.41862	1.86151
AAEL015341	234.794	144.66	7.81853
AAEL015370	16.4255	5.81453	13.0556
AAEL015373	6.71945	1.15134	11.1672
AAEL015374	3.77156	1.72404	6.35614
AAEL015384	0.795601	0.523843	0.0313234
AAEL015386	310.205	261.683	176.815
AAEL015389	0.315868	0.105475	2.85446
AAEL015391	0.512878	0.0122258	0.478297
AAEL015414	0.186235	0.42124	1.94786
AAEL015419	0.377401	0.590253	0.0475641
AAEL015438	6.76747	1.36153	8.78697
AAEL015440	2.16505	9.25702	12.4219
AAEL015447	242.664	43.3437	112.964
AAEL015459	3.13614	1.6661	6.34161
AAEL015467	22.5837	9.92373	26.5732
AAEL015479	0.0627023	0.310095	1.78307
AAEL015480	0.278718	0.127631	0.857808
AAEL015484	18.7965	11.0496	0.0362179
AAEL015485	8.03862	5.10345	22.649
AAEL015487	3.65446	0	2.21578
AAEL015504	1.30637	0.455068	1.9158
AAEL015512	19.9903	17.0056	39.3041
AAEL015520	0.810441	0.150461	3.02567
AAEL015532	1.26072	0	0.830858
AAEL015549	25.5787	26.6243	11.9891
AAEL015555	0.175235	0	0.318061
AAEL015567	0.275003	2.68413	0.813065
AAEL015593	50.5454	114.259	89.8176
AAEL015594	17.5152	8.88438	11.4322
AAEL015595	9.57365	5.10155	10.5281
AAEL015598	1.55889	1.8134	4.75706
AAEL015601	3.62344	2.02541	6.002
AAEL015603	3.54764	2.13214	7.57832
AAEL015606	5.45587	48.5187	29.0522
AAEL015607	0.771594	0.361898	0.102062
AAEL015616	14.9222	1.67169	11.355
AAEL015633	20.881	1.91694	18.1684
AAEL015640	0.463816	0.117699	1.1126
AAEL015644	0.730984	0.883985	2.73598
AAEL015657	30.7542	7.44076	0
AAEL015663	1.91144	0.468591	2.16005
AAEL015671	2.46786	3.04966	1.07851
AAEL016968	1.43669	0.584002	4.28562
AAEL016996	28.9261	46.654	17.8149
AAEL017034	4.79826	12.6612	19.0793
AAEL017046	0.0648152	1.87839	7.18295
AAEL017049	13.0211	15.6756	7.74538
AAEL017083	88.5239	44.5387	35.9193
AAEL017088	7.59406	10.0141	5.28665
AAEL017119	6347.54	10659.2	3232.54
AAEL017132	10.7678	39.7364	44.9802
AAEL017144	18.227	81.1049	8.91827
AAEL017154	22.2817	2.30536	47.7077
AAEL017162	2.35494	2.39322	0.808299
AAEL017171	2.32357	2.81671	0.973888
AAEL017181	0.142649	0.0204298	0.34106
AAEL017183	4.03803	5.10866	2.17243
AAEL017196	8.37322	3.56009	3.99184
AAEL017209	1.92321	0	0.636034
AAEL017222	5.17241	4.45547	9.94284
AAEL017245	4.08873	11.3487	12.2775
AAEL017248	6.80374	8.47237	14.78
AAEL017265	12.3318	3.03094	16.7211
AAEL017268	4.6469	1.28053	2.12665
AAEL017284	62.6238	114.264	49.6147
AAEL017291	60.4278	15.6163	12.4827
AAEL017292	0.28644	0.250839	1.7689
AAEL017298	3.92877	8.6757	3.33444
AAEL017317	6.00883	12.1113	4.892
AAEL017320	10.002	5.40067	4.62822
AAEL017351	0.776329	0	0.996175
AAEL017380	6.93156	23.441	1.47754
AAEL017389	1.40472	0.119667	0.675546
AAEL017418	0.0937309	0.525152	0
AAEL017457	1760.6	216.888	1559.56
AAEL017458	6.86541	2.4593	5.68188
AAEL017462	14.468	28.2189	21.0424
AAEL017468	132.63	95.932	54.8814
AAEL017496	1.77797	7.75918	1.59538
AAEL017512	40.1865	55.144	33.4575
AAEL017518	0.34746	0.106388	1.39369
AAEL017524	1.72826	6.21798	2.24866
AAEL017539	2.14677	0.00860707	0.212725
AAEL017572	0.866026	0.355078	1.66746
AAEL017973	0.125133	0.0918091	9.43417
AAEL017974	0	0.0208552	5.64183
AAEL017975	0.169361	0.0799349	8.98445
AAEL017976	0.0165758	0.0139509	3.99903
AAEL017977	0.0334586	0.0310876	2.1922
AAEL017993	4.85401	10.3733	7.63855
AAEL018016	14.8006	13.3536	5.63027
AAEL018023	0.0715229	0.0410874	1.88422
AAEL018026	1.1555	2.33075	0.389019
AAEL018030	0.822354	0.235494	0.122118
AAEL018110	64.1607	36.1347	54.7134
AAEL018140	122.963	202.041	97.4337
AAEL018149	0.014309	0.469921	0.120398
AAEL018204	3.4461	2.0459	4.75236
AAEL018249	69.9191	55.823	27.6425
AAEL018259	3.62483	2.16086	5.38358
AAEL018265	0.501503	1.11471	0.353813
AAEL018267	10.4647	19.7088	12.2639
AAEL018304	0.0749652	0.573927	0.179959
AAEL018323	22.4258	24.8477	13.2832
AAEL018345	2.23101	10.0934	6.21442
AAEL018678	33.745	32.4662	67.1492
AAEL018696	935.884	313.687	351.604
AAEL018699	8.88283	10.7419	5.66569
AAEL018700	2.63087	1.42166	4.07162
AAEL018702	0.961177	0.219601	1.68322
AAEL018711	3.73893	1.96193	5.23693
AAEL019315	1.1151	2.94129	17.9047

## Sheet: WTDcr2R2d2Reads
Gene_id	chromosome	Strand	start	end	length	WT1_readcount	WT2_readcount	WT3_readcount	DR1_readcount	DR2_readcount	DR3_readcount	RD1_readcount	RD2_readcount	RD3_readcount	WT1_fpkm	WT2_fpkm	WT3_fpkm	DR1_fpkm	DR2_fpkm	DR3_fpkm	RD1_fpkm	RD2_fpkm	RD3_fpkm	LVP_group_fpkm	DCR2_group_fpkm	R2D2_group_fpkm	DCR2_readcount(DCR2vsLVP)	LVP_readcount(DCR2vsLVP)	log2FoldChange(DCR2vsLVP)	pval(DCR2vsLVP)	padj(DCR2vsLVP)	significant(DCR2vsLVP)	DCR2_readcount(DCR2vsR2D2)	R2D2_readcount(DCR2vsR2D2)	log2FoldChange(DCR2vsR2D2)	pval(DCR2vsR2D2)	padj(DCR2vsR2D2)	significant(DCR2vsR2D2)	R2D2_readcount(R2D2vsLVP)	LVP_readcount(R2D2vsLVP)	log2FoldChange(R2D2vsLVP)	pval(R2D2vsLVP)	padj(R2D2vsLVP)	significant(R2D2vsLVP)	biological_process	biological_process_description	cellular_component	cellular_component_description	molecular_function
AAEL000001	supercont1.1	-	4290724	4298425	1590	86	126	62	85	147	75	100	61	148	2.72672	4.14931	2.13338	3.37641	4.14931	2.08671	3.21178	1.95577	4.43526	3.00314	3.20414	3.20094	94.6069	92.5901	0.031088	0.96505	1	FALSE	101.418	95.525	0.086362	0.86067	1	FALSE	91.1803	93.9905	-0.043792	0.94034	1	FALSE	GO:0051807//GO:0075136//GO:0044403//GO:0043207//GO:0008150//GO:0051701//GO:0044415//GO:0051834//GO:0044419//GO:0044413//GO:0051832//GO:0051704//GO:0009605//GO:0030682//GO:0051707//GO:0052173//GO:0009607//GO:0052200//GO:0050896	evasion or tolerance of defense response of other organism involved in symbiotic interaction//response to host//symbiosis, encompassing mutualism through parasitism//response to external biotic stimulus//biological_process//interaction with host//evasion or tolerance of host defenses//evasion or tolerance of defenses of other organism involved in symbiotic interaction//interspecies interaction be…	--	--	--
AAEL000002	supercont1.1	+	1151653	1151850	198	3	12	6	4	13	8	7	2	7	0.763828	3.17335	1.65791	1.27593	2.94669	1.78741	1.80541	0.514931	1.68456	1.86503	2.00334	1.33497	7.53063	6.99618	0.1062	0.97065	1	FALSE	8.06826	4.91562	0.71488	0.53738	0.96414	FALSE	4.69221	7.09885	-0.59732	0.6444	1	FALSE	--	--	--	--	--
AAEL000003	supercont1.1	+	3644561	3668187	2093	131	161	95	171	249	159	217	137	358	3.15531	4.02771	2.48329	5.16012	5.33932	3.36068	5.2946	3.33684	8.1502	3.2221	4.62004	5.59388	180.225	132.499	0.44382	0.20675	0.97601	FALSE	193.182	218.879	-0.18017	0.47141	0.93394	FALSE	208.929	134.576	0.63459	0.052511	0.61848	FALSE	--	--	--	--	--
AAEL000004	supercont1.1	-	2714033	2718806	2571	126	302	76	185	292	134	322	158	341	2.47063	6.15045	1.61728	4.54467	5.09726	2.30569	6.39583	3.13285	6.31985	3.41279	3.98254	5.28284	188.991	162.734	0.21581	0.78761	1	FALSE	202.629	256.681	-0.34114	0.29302	0.79798	FALSE	244.996	164.87	0.57142	0.26264	1	FALSE	--	--	--	--	GO:0016757//GO:0003824//GO:0016740//GO:0003674
AAEL000005	supercont1.1	+	4197253	4221459	1268	52	108	31	53	75	47	90	65	125	2.0674	4.45971	1.33757	2.63991	2.65459	1.63975	3.62465	2.61324	4.69727	2.62156	2.31142	3.64505	54.5405	62.2882	-0.19163	0.57391	1	FALSE	58.464	87.6948	-0.58494	0.12523	0.55239	FALSE	83.7014	63.1331	0.40686	0.4156	1	FALSE	GO:0046483//GO:0009987//GO:0008150//GO:0006139//GO:0006807//GO:0009307//GO:0006304//GO:0006725//GO:0043170//GO:0044238//GO:1901360//GO:0050896//GO:0008152//GO:0006950//GO:0006952//GO:0090304//GO:0034641//GO:0006259//GO:0071704//GO:0044237//GO:0044355//GO:0044260//GO:0043412	heterocycle metabolic process//cellular process//biological_process//nucleobase-containing compound metabolic process//nitrogen compound metabolic process//DNA restriction-modification system//DNA modification//cellular aromatic compound metabolic process//macromolecule metabolic process//primary metabolic process//organic cyclic compound metabolic process//response to stimulus//metabolic process…	GO:0044424//GO:0044464//GO:0005634//GO:0043229//GO:0005623//GO:0043231//GO:0043226//GO:0043227//GO:0005575//GO:0005622	intracellular part//cell part//nucleus//intracellular organelle//cell//intracellular membrane-bounded organelle//organelle//membrane-bounded organelle//cellular_component//intracellular	GO:0004536//GO:0043167//GO:0016788//GO:0046872//GO:0003824//GO:0043169//GO:0004518//GO:0003677//GO:0097159//GO:0004520//GO:1901363//GO:0003676//GO:0016893//GO:0004519//GO:0016787//GO:0009036//GO:0016888//GO:0046914//GO:0015666//GO:0008270//GO:0005488//GO:0003674
AAEL000006	supercont1.1	-	4321517	4359569	2258	1296	946	684	158	651	208	3076	1052	1474	30.3741	23.0278	17.3976	4.63927	13.583	4.27781	73.0279	24.9322	32.6521	23.5999	7.50003	43.5374	300.346	1020.07	-1.764	0.00094533	0.026856	DOWN	321.946	1800.83	-2.4838	0.0084438	0.10534	FALSE	1718.66	1036.75	0.72922	0.26275	1	FALSE	GO:0071704//GO:0046364//GO:0019319//GO:1901576//GO:0044283//GO:0044711//GO:0005996//GO:0006094//GO:0019318//GO:0044723//GO:0044281//GO:0008150//GO:0008152//GO:0006006//GO:0044710//GO:0009058//GO:0044238//GO:0016051//GO:0044699//GO:0005975	organic substance metabolic process//monosaccharide biosynthetic process//hexose biosynthetic process//organic substance biosynthetic process//small molecule biosynthetic process//single-organism biosynthetic process//monosaccharide metabolic process//gluconeogenesis//hexose metabolic process//single-organism carbohydrate metabolic process//small molecule metabolic process//biological_process//me…	--	--	GO:0036094//GO:0035639//GO:0016831//GO:0016829//GO:0032553//GO:0017076//GO:1901265//GO:0032561//GO:0019001//GO:0003674//GO:0005488//GO:0004611//GO:0097367//GO:0032549//GO:0005525//GO:0043167//GO:0043168//GO:0000166//GO:1901363//GO:0032550//GO:0097159//GO:0016830//GO:0001883//GO:0001882//GO:0032555//GO:0003824
AAEL000007	supercont1.1	+	3849185	3866464	1787	0	2	0	0	0	1	0	1	1	0	0.0586013	0	0	0	0.0247556	0	0.0285273	0.0266643	0.0195338	0.00825188	0.0183972	0.319083	0.567322	-0.83024	0.97742	1	FALSE	0.340819	0.652502	-0.93698	1	1	FALSE	0.622667	0.571315	0.12417	1	1	FALSE	--	--	GO:0005575//GO:0016020	cellular_component//membrane	GO:0003674//GO:0015075//GO:0060089//GO:0022838//GO:0008066//GO:0005234//GO:0022836//GO:0015276//GO:0022803//GO:0005231//GO:0004970//GO:0022857//GO:0004871//GO:0038023//GO:0004872//GO:0022892//GO:0005215//GO:0022891//GO:0015267//GO:0022834//GO:0005230//GO:0005216//GO:0004888
AAEL000008	supercont1.1	-	5292699	5321896	1949	471	483	407	321	488	478	441	368	512	12.1828	12.9759	11.425	10.4022	11.2373	10.8496	11.555	9.62544	12.5174	12.1946	10.8297	11.2326	401.19	476.637	-0.2486	0.44737	1	FALSE	429.821	422.101	0.026145	0.89632	1	FALSE	402.846	484.572	-0.26648	0.42796	1	FALSE	GO:0036211//GO:0044267//GO:0016579//GO:0009987//GO:0070646//GO:0006508//GO:0044260//GO:0006464//GO:0019538//GO:0070647//GO:0008152//GO:0044238//GO:0043170//GO:0008150//GO:0043412//GO:0044237//GO:0071704	protein modification process//cellular protein metabolic process//protein deubiquitination//cellular process//protein modification by small protein removal//proteolysis//cellular macromolecule metabolic process//cellular protein modification process//protein metabolic process//protein modification by small protein conjugation or removal//metabolic process//primary metabolic process//macromolecule…	--	--	GO:0003824//GO:0005515//GO:0005488//GO:0016787//GO:0036459//GO:0003674
AAEL000009	supercont1.1	-	5258339	5264494	761	0	5	4	3	3	1	0	0	1	0	0.344023	0.287574	0.248983	0.176926	0.0581319	0	0	0.0626138	0.210532	0.161347	0.0208713	2.21916	3.09572	-0.48026	0.8722	1	FALSE	2.3806	0.266012	3.1618	0.41145	0.89359	FALSE	0.254089	3.14598	-3.6301	0.26421	1	FALSE	--	--	--	--	--
AAEL000010	supercont1.1	-	4236617	4237833	735	15904	15237	16687	10140	14850	13066	18495	17284	17136	1272.64	1266.37	1449.14	1016.55	1057.89	917.489	1499.19	1398.58	1296.05	1329.38	997.312	1397.94	11870.7	17024.8	-0.52023	0.062506	0.55533	FALSE	12719.8	17264	-0.4407	0.10782	0.51663	FALSE	16475	17320.2	-0.072179	0.85441	1	FALSE	GO:0009059//GO:0008152//GO:0043170//GO:0044238//GO:0010467//GO:0043603//GO:0008150//GO:1901566//GO:0044237//GO:0034645//GO:0071704//GO:0044249//GO:0009058//GO:0043604//GO:0043043//GO:1901564//GO:0044267//GO:0006807//GO:0009987//GO:0044271//GO:0044260//GO:0006518//GO:0006412//GO:0034641//GO:1901576//GO:0019538	macromolecule biosynthetic process//metabolic process//macromolecule metabolic process//primary metabolic process//gene expression//cellular amide metabolic process//biological_process//organonitrogen compound biosynthetic process//cellular metabolic process//cellular macromolecule biosynthetic process//organic substance metabolic process//cellular biosynthetic process//biosynthetic process//amid…	GO:0043229//GO:0044444//GO:0030529//GO:0005622//GO:0032991//GO:0005575//GO:0043232//GO:0044464//GO:0044424//GO:0005737//GO:0043228//GO:0043226//GO:1990904//GO:0005623//GO:0005840	intracellular organelle//cytoplasmic part//intracellular ribonucleoprotein complex//intracellular//macromolecular complex//cellular_component//intracellular non-membrane-bounded organelle//cell part//intracellular part//cytoplasm//non-membrane-bounded organelle//organelle//ribonucleoprotein complex//cell//ribosome	GO:0005198//GO:0003674//GO:0003735
AAEL000011	supercont1.1	-	3776835	3779042	2141	0	0	0	0	0	0	0	0	0	0	0	0	0	0	0	0	0	0	0	0	0	0	0	NA	NA	NA	NA	0	0	NA	NA	NA	NA	0	0	NA	NA	NA	NA	--	--	GO:0016020//GO:0044425//GO:0016021//GO:0005575//GO:0031224	membrane//membrane part//integral component of membrane//cellular_component//intrinsic component of membrane	GO:0004888//GO:0022891//GO:0022892//GO:0005215//GO:0005230//GO:0005216//GO:0008236//GO:0017171//GO:0015267//GO:0022834//GO:0003824//GO:0016787//GO:0022857//GO:0004175//GO:0008233//GO:0004970//GO:0004872//GO:0004871//GO:0038023//GO:0070011//GO:0022838//GO:0003674//GO:0015075//GO:0060089//GO:0022803//GO:0004252//GO:0005231//GO:0008066//GO:0005234//GO:0022836//GO:0015276
AAEL000012	supercont1.1	+	2681591	2683193	1326	1	3	0	2	0	0	4	5	1	0.0380186	0.118462	0	0.095262	0	0	0.154049	0.192225	0.0359344	0.0521603	0.031754	0.127403	0.723494	1.20969	-0.74159	0.86588	1	FALSE	0.777189	3.50164	-2.1717	0.353	0.85283	FALSE	3.34065	1.22178	1.4511	0.64413	1	FALSE	GO:0050909//GO:0009593//GO:0042221//GO:0050896//GO:0003008//GO:0051606//GO:0050907//GO:0032501//GO:0007606//GO:0008150//GO:0050877//GO:0044699//GO:0007600//GO:0050912//GO:0050906//GO:0044707	sensory perception of taste//detection of chemical stimulus//response to chemical//response to stimulus//system process//detection of stimulus//detection of chemical stimulus involved in sensory perception//multicellular organismal process//sensory perception of chemical stimulus//biological_process//neurological system process//single-organism process//sensory perception//detection of chemical s…	GO:0016020//GO:0016021//GO:0031224//GO:0044425//GO:0005575	membrane//integral component of membrane//intrinsic component of membrane//membrane part//cellular_component	GO:0004872//GO:0004930//GO:0038023//GO:0004871//GO:0004888//GO:0008527//GO:0060089//GO:0003674
AAEL000013	supercont1.1	+	1528739	1544606	1683	99	138	149	91	157	115	110	92	142	2.96545	4.29336	4.84368	3.415	4.18669	3.02282	3.33773	2.78669	4.0203	4.03416	3.5415	3.38157	112.257	137.141	-0.28886	0.5428	1	FALSE	120.296	109.168	0.14003	0.66433	1	FALSE	104.191	139.521	-0.42125	0.32314	1	FALSE	GO:0071704//GO:0006457//GO:0018193//GO:0043412//GO:0044237//GO:0008150//GO:0008152//GO:0044238//GO:0043170//GO:0000413//GO:0006464//GO:0019538//GO:0044260//GO:0044267//GO:0018208//GO:0009987//GO:0036211	organic substance metabolic process//protein folding//peptidyl-amino acid modification//macromolecule modification//cellular metabolic process//biological_process//metabolic process//primary metabolic process//macromolecule metabolic process//protein peptidyl-prolyl isomerization//cellular protein modification process//protein metabolic process//cellular macromolecule metabolic process//cellular …	--	--	GO:0003674//GO:0016853//GO:0016859//GO:0005488//GO:0005515//GO:0003755//GO:0003824
AAEL000014	supercont1.1	+	4998173	5068231	3987	1	21	2	4	3	1	4	3	5	0.0126443	0.275788	0.0274446	0.0633646	0.03377	0.0110956	0.0512338	0.0383583	0.0597555	0.105292	0.0360767	0.0497826	2.58091	7.15429	-1.4709	0.36632	1	FALSE	2.7692	3.7927	-0.45376	0.80716	1	FALSE	3.61985	7.22246	-0.99656	0.46518	1	FALSE	GO:0044699//GO:0006811//GO:0008150//GO:0051234//GO:0044765//GO:0051179//GO:0009987//GO:1902578//GO:0006810//GO:0055085//GO:0044763	single-organism process//ion transport//biological_process//establishment of localization//single-organism transport//localization//cellular process//single-organism localization//transport//transmembrane transport//single-organism cellular process	GO:0005575//GO:0016020	cellular_component//membrane	GO:0022892//GO:0005215//GO:0022891//GO:0003674//GO:0015075//GO:0022857//GO:0015267//GO:0005216//GO:0022803//GO:0022838
AAEL000015	supercont1.1	-	5404697	5466186	7277	574	803	495	857	1089	1311	568	565	688	3.97648	5.77784	3.72157	7.43809	6.71632	7.96983	3.98602	3.95804	4.50496	4.49196	7.37475	4.14967	1024.12	641.258	0.67541	0.015149	0.22413	FALSE	1097.1	586.434	0.90366	0.00060096	0.013673	UP	559.662	651.347	-0.21887	0.42002	1	FALSE	GO:0009058//GO:0044710//GO:1901360//GO:0044249//GO:0090407//GO:0006725//GO:0009150//GO:0009190//GO:0019693//GO:0072521//GO:0055086//GO:1901564//GO:0009260//GO:0044281//GO:0009987//GO:0052652//GO:0009259//GO:0046483//GO:0006753//GO:0006807//GO:0006796//GO:0009187//GO:0006164//GO:0044271//GO:1901362//GO:0046058//GO:0019637//GO:0019438//GO:0044763//GO:1901576//GO:0034641//GO:1901293//GO:1901135//GO:…	biosynthetic process//single-organism metabolic process//organic cyclic compound metabolic process//cellular biosynthetic process//organophosphate biosynthetic process//cellular aromatic compound metabolic process//purine ribonucleotide metabolic process//cyclic nucleotide biosynthetic process//ribose phosphate metabolic process//purine-containing compound metabolic process//nucleobase-containing…	GO:0016020//GO:0044464//GO:0005886//GO:0071944//GO:0005623//GO:0005575	membrane//cell part//plasma membrane//cell periphery//cell//cellular_component	GO:0009975//GO:0003824//GO:0016849//GO:0005488//GO:0044877//GO:0004016//GO:0003674//GO:0016829//GO:0003682
AAEL000016	supercont1.1	+	228726	230295	981	65	190	113	104	147	87	140	97	192	3.34029	10.1411	6.30207	6.69572	6.72518	3.92328	7.28789	5.04066	9.32581	6.5945	5.78139	7.21812	105.309	124.599	-0.24266	0.49727	1	FALSE	112.891	134.175	-0.24918	0.43317	0.90713	FALSE	128.066	126.512	0.017609	0.97517	1	FALSE	--	--	--	--	GO:0003674//GO:0003824//GO:0016787
AAEL000017	supercont1.1	+	850730	868471	840	12	5	3	5	4	10	9	7	11	0.72018	0.311668	0.195396	0.375944	0.213716	0.526647	0.54715	0.424818	0.623976	0.409082	0.372102	0.531981	6.08602	6.98086	-0.19791	0.91034	1	FALSE	6.51649	8.5637	-0.39414	0.70525	1	FALSE	8.1733	7.09424	0.20427	0.86744	1	FALSE	--	--	--	--	--
AAEL000018	supercont1.1	+	4048153	4050704	1908	0	0	0	0	1	0	0	0	0	0	0	0	0	0.0235222	0	0	0	0	0	0.00784072	0	0.271614	0	Inf	1	1	FALSE	0.291333	0	Inf	0.99811	1	FALSE	0	0	NA	NA	NA	NA	--	--	GO:0044459//GO:0016020//GO:0044464//GO:0071944//GO:0005886//GO:0005623//GO:0016021//GO:0031224//GO:0005887//GO:0044425//GO:0031226//GO:0005575	plasma membrane part//membrane//cell part//cell periphery//plasma membrane//cell//integral component of membrane//intrinsic component of membrane//integral component of plasma membrane//membrane part//intrinsic component of plasma membrane//cellular_component	GO:0015267//GO:0022834//GO:0005216//GO:0004871//GO:0038023//GO:0004872//GO:0004970//GO:0022836//GO:0015276//GO:0005231//GO:0022803//GO:0022838//GO:0004888//GO:0005230//GO:0022892//GO:0005215//GO:0022891//GO:0022857//GO:0008066//GO:0005234//GO:0060089//GO:0015075//GO:0003674
AAEL000019	supercont1.1	+	3333430	3333873	444	39	40	41	45	68	78	20	70	84	4.42814	4.71714	5.05213	6.40122	6.87356	7.7716	2.30033	8.0371	9.01469	4.73247	7.01546	6.45071	59.6368	42.5295	0.48774	0.2883	1	FALSE	63.8813	55.9152	0.19215	0.68636	1	FALSE	53.3623	43.2601	0.30278	0.56625	1	FALSE	GO:0043170//GO:1901135//GO:0008152//GO:0008150//GO:0006807//GO:1901564//GO:1901071//GO:0006040//GO:0006030//GO:0006022//GO:0071704	macromolecule metabolic process//carbohydrate derivative metabolic process//metabolic process//biological_process//nitrogen compound metabolic process//organonitrogen compound metabolic process//glucosamine-containing compound metabolic process//amino sugar metabolic process//chitin metabolic process//aminoglycan metabolic process//organic substance metabolic process	GO:0005576//GO:0005575	extracellular region//cellular_component	GO:0097367//GO:0005488//GO:0003674//GO:0008061
AAEL000020	supercont1.1	+	2796903	2803586	2892	400	461	360	439	559	518	367	351	481	6.9727	8.34651	6.81048	9.58736	8.675	7.92374	6.48053	6.18719	7.92504	7.37656	8.7287	6.86425	475.924	425.218	0.16253	0.54756	1	FALSE	509.992	383.176	0.41247	0.13638	0.57586	FALSE	365.695	432.203	-0.24107	0.46364	1	FALSE	GO:0097659//GO:0006396//GO:0009889//GO:0034660//GO:0050794//GO:0071704//GO:0034645//GO:0034654//GO:0051171//GO:0050789//GO:0031323//GO:0044403//GO:0044237//GO:0044711//GO:0018130//GO:0043412//GO:0006139//GO:0009877//GO:0010556//GO:0008150//GO:0019219//GO:0006400//GO:0044723//GO:0010467//GO:0006260//GO:0044238//GO:0043170//GO:2000112//GO:0009312//GO:0044699//GO:0008152//GO:0006355//GO:0009059//GO:…	nucleic acid-templated transcription//RNA processing//regulation of biosynthetic process//ncRNA metabolic process//regulation of cellular process//organic substance metabolic process//cellular macromolecule biosynthetic process//nucleobase-containing compound biosynthetic process//regulation of nitrogen compound metabolic process//regulation of biological process//regulation of cellular metabolic…	GO:0070013//GO:0043227//GO:0043231//GO:0031981//GO:0032991//GO:0005575//GO:0005654//GO:0005622//GO:0043233//GO:0044428//GO:0043229//GO:0005634//GO:0005623//GO:0044451//GO:0043226//GO:0031974//GO:0016592//GO:0044446//GO:0044424//GO:0044464//GO:0044422//GO:0043234	intracellular organelle lumen//membrane-bounded organelle//intracellular membrane-bounded organelle//nuclear lumen//macromolecular complex//cellular_component//nucleoplasm//intracellular//organelle lumen//nuclear part//intracellular organelle//nucleus//cell//nucleoplasm part//organelle//membrane-enclosed lumen//mediator complex//intracellular organelle part//intracellular part//cell part//organel…	GO:0000989//GO:0016278//GO:0016423//GO:0051998//GO:0001104//GO:0003674//GO:0008168//GO:0001076//GO:0000988//GO:0016279//GO:0008173//GO:0008757//GO:0008175//GO:0042054//GO:0016740//GO:0008176//GO:0008171//GO:0003712//GO:0008170//GO:0008276//GO:0016741//GO:0010340//GO:0003824//GO:0004719//GO:0018024
AAEL000021	supercont1.1	-	3522555	3553481	2063	0	0	0	0	0	0	0	0	0	0	0	0	0	0	0	0	0	0	0	0	0	0	0	NA	NA	NA	NA	0	0	NA	NA	NA	NA	0	0	NA	NA	NA	NA	--	--	--	--	--
AAEL000022	supercont1.1	+	5369841	5370711	871	207	208	248	255	326	391	213	247	362	11.981	12.504	15.5778	18.4908	16.7979	19.859	12.4883	14.4565	19.8036	13.3542	18.3826	15.5828	305.553	237.254	0.36499	0.18229	0.93329	FALSE	327.326	261.153	0.32583	0.27668	0.78034	FALSE	249.245	241.429	0.045965	0.73951	1	FALSE	--	--	--	--	--
AAEL000023	supercont1.1	-	287855	290411	2557	1	8	4	1	4	8	4	6	13	0.0197155	0.163818	0.085586	0.0247003	0.0702077	0.138407	0.0798863	0.11962	0.242252	0.0897065	0.0777717	0.147253	4.00086	4.30541	-0.10584	0.98234	1	FALSE	4.28048	7.08027	-0.72603	0.55607	0.97477	FALSE	6.7583	4.36776	0.62977	0.65211	1	FALSE	GO:0022404//GO:2001141//GO:1902589//GO:0031110//GO:0080090//GO:0051128//GO:0018130//GO:0007154//GO:0044271//GO:0044260//GO:0018990//GO:0044707//GO:1901362//GO:0044700//GO:0051716//GO:0016070//GO:0031109//GO:0044237//GO:0044848//GO:0031326//GO:0071704//GO:0007049//GO:0050789//GO:0034654//GO:0007165//GO:0034645//GO:0051171//GO:0048285//GO:0031323//GO:0060255//GO:0007186//GO:0097659//GO:0019438//GO:…	molting cycle process//regulation of RNA biosynthetic process//single-organism organelle organization//regulation of microtubule polymerization or depolymerization//regulation of primary metabolic process//regulation of cellular component organization//heterocycle biosynthetic process//cell communication//cellular nitrogen compound biosynthetic process//cellular macromolecule metabolic process//e…	GO:0000940//GO:0005622//GO:0000502//GO:0032991//GO:0005876//GO:0005575//GO:0044430//GO:0043228//GO:0043232//GO:0000777//GO:0043226//GO:0005623//GO:0008537//GO:0000775//GO:0005694//GO:0005856//GO:0044427//GO:0043229//GO:0000779//GO:0005874//GO:0044422//GO:0000793//GO:0043234//GO:0022624//GO:0044464//GO:0015630//GO:0098687//GO:0044446//GO:0044424//GO:0000776//GO:0005819	condensed chromosome outer kinetochore//intracellular//proteasome complex//macromolecular complex//spindle microtubule//cellular_component//cytoskeletal part//non-membrane-bounded organelle//intracellular non-membrane-bounded organelle//condensed chromosome kinetochore//organelle//cell//proteasome activator complex//chromosome, centromeric region//chromosome//cytoskeleton//chromosomal part//intra…	GO:0003700//GO:0003674//GO:0005102//GO:0005488//GO:0044877//GO:0032403//GO:0005515//GO:0008255//GO:0043565//GO:0008092//GO:0003676//GO:1901363//GO:0005179//GO:0005184//GO:0097159//GO:0003677//GO:0008017//GO:0015631//GO:0001071
AAEL000024	supercont1.1	+	67596	79580	1427	36	21	10	29	161	65	56	19	37	1.2718	0.770544	0.383398	1.28353	5.06358	2.01506	2.00404	0.678757	1.23547	0.80858	2.78739	1.30609	74.9609	23.0639	1.7005	0.065856	0.56931	FALSE	80.3271	35.4302	1.1809	0.14622	0.5968	FALSE	33.8157	23.4261	0.52958	0.42013	1	FALSE	GO:0044260//GO:0044237//GO:0043412//GO:0019538//GO:0071704//GO:0006464//GO:0017013//GO:0044238//GO:0043170//GO:0008152//GO:0036211//GO:0008150//GO:0009987//GO:0044267	cellular macromolecule metabolic process//cellular metabolic process//macromolecule modification//protein metabolic process//organic substance metabolic process//cellular protein modification process//protein flavinylation//primary metabolic process//macromolecule metabolic process//metabolic process//protein modification process//biological_process//cellular process//cellular protein metabolic p…	--	--	--
AAEL000025	supercont1.1	-	4357192	4359979	2668	0	0	0	0	0	0	0	0	0	0	0	0	0	0	0	0	0	0	0	0	0	0	0	NA	NA	NA	NA	0	0	NA	NA	NA	NA	0	0	NA	NA	NA	NA	GO:0071704//GO:0046364//GO:1901576//GO:0019319//GO:0044283//GO:0044711//GO:0006094//GO:0005996//GO:0044281//GO:0044723//GO:0019318//GO:0008150//GO:0008152//GO:0044710//GO:0009058//GO:0006006//GO:0016051//GO:0044238//GO:0005975//GO:0044699	organic substance metabolic process//monosaccharide biosynthetic process//organic substance biosynthetic process//hexose biosynthetic process//small molecule biosynthetic process//single-organism biosynthetic process//gluconeogenesis//monosaccharide metabolic process//small molecule metabolic process//single-organism carbohydrate metabolic process//hexose metabolic process//biological_process//me…	--	--	GO:0016831//GO:0035639//GO:0036094//GO:0032553//GO:0016829//GO:1901265//GO:0017076//GO:0019001//GO:0032561//GO:0003674//GO:0005488//GO:0097367//GO:0004611//GO:0032549//GO:0043167//GO:0005525//GO:0000166//GO:0043168//GO:1901363//GO:0097159//GO:0032550//GO:0001882//GO:0001883//GO:0016830//GO:0003824//GO:0032555
AAEL000026	supercont1.1	+	2726733	2728501	787	9	60	24	33	48	4	54	24	52	0.57651	3.99189	1.66844	2.64833	2.7373	0.224845	3.50398	1.55461	3.14835	2.07895	1.87016	2.73565	26.2514	30.3125	-0.20752	0.76445	1	FALSE	28.1709	40.7012	-0.53087	0.3842	0.87342	FALSE	38.8481	30.7289	0.33825	0.6566	1	FALSE	--	--	--	--	--
AAEL000027	supercont1.1	+	3722835	3724765	1761	0	0	1	0	0	0	0	0	0	0	0	0.0310681	0	0	0	0	0	0	0.010356	0	0	0	0.419353	#NAME?	0.98735	1	FALSE	0	0	NA	NA	NA	NA	0	0.429423	#NAME?	0.98345	1	FALSE	--	--	GO:0016020//GO:0005575	membrane//cellular_component	GO:0004888//GO:0005230//GO:0005216//GO:0015267//GO:0022834//GO:0022891//GO:0022892//GO:0005215//GO:0004872//GO:0038023//GO:0004871//GO:0022857//GO:0004970//GO:0022803//GO:0005231//GO:0005234//GO:0008066//GO:0022836//GO:0015276//GO:0022838//GO:0003674//GO:0015075//GO:0060089
AAEL000028	supercont1.1	-	2095012	2113327	1089	134	310	133	300	986	454	247	98	163	6.20321	14.9051	6.68186	17.3991	40.6354	18.4428	11.5828	4.58757	7.13205	9.2634	25.4924	7.76746	521.199	191.776	1.4424	0.02181	0.2885	FALSE	558.564	161.707	1.7883	0.0063367	0.085366	FALSE	154.334	194.551	-0.33409	0.38347	1	FALSE	GO:0008152//GO:0043170//GO:0044238//GO:0008150//GO:0071704//GO:0006508//GO:0019538	metabolic process//macromolecule metabolic process//primary metabolic process//biological_process//organic substance metabolic process//proteolysis//protein metabolic process	--	--	GO:0017171//GO:0003674//GO:0008233//GO:0004175//GO:0003824//GO:0008236//GO:0070011//GO:0004252//GO:0016787
AAEL000029	supercont1.1	+	85702	96572	2002	0	0	0	0	0	0	0	1	0	0	0	0	0	0	0	0	0.0254636	0	0	0	0.00848788	0	0	NA	NA	NA	NA	0	0.38649	#NAME?	1	1	FALSE	0.368577	0	Inf	1	1	FALSE	--	--	--	--	--
AAEL000031	supercont1.1	-	3810868	3813135	1854	0	3	0	0	0	0	0	0	0	0	0.0847254	0	0	0	0	0	0	0	0.0282418	0	0	0	0.850983	#NAME?	0.73976	1	FALSE	0	0	NA	NA	NA	NA	0	0.856973	#NAME?	0.66707	1	FALSE	--	--	GO:0016021//GO:0005575//GO:0031224//GO:0016020//GO:0044425	integral component of membrane//cellular_component//intrinsic component of membrane//membrane//membrane part	GO:0016772//GO:0004970//GO:0022857//GO:0004871//GO:0038023//GO:0004872//GO:0003674//GO:0060089//GO:0015075//GO:0016780//GO:0022838//GO:0008066//GO:0016740//GO:0015276//GO:0022836//GO:0022803//GO:0008963//GO:0004888//GO:0005215//GO:0022892//GO:0022891//GO:0003824//GO:0022834//GO:0015267//GO:0005230//GO:0005216
AAEL000032	supercont1.1	+	4249096	4260105	2191	24294	23117	24107	19191	27807	23258	22506	22015	23550	818.666	809.1	881.628	810.213	834.216	687.764	768.263	750.191	750.091	836.464	777.397	756.181	21916.3	25381.2	-0.21176	0.51284	1	FALSE	23485.4	22105.5	0.087359	0.63105	1	FALSE	21095.6	25818.3	-0.29145	0.33814	1	FALSE	GO:0034645//GO:0071704//GO:1901566//GO:0044237//GO:0010467//GO:0043603//GO:0008150//GO:0008152//GO:0009059//GO:0043170//GO:0044238//GO:0006518//GO:0006412//GO:1901576//GO:0034641//GO:0019538//GO:0044271//GO:0044260//GO:0043043//GO:1901564//GO:0044267//GO:0006807//GO:0009987//GO:0044249//GO:0009058//GO:0043604	cellular macromolecule biosynthetic process//organic substance metabolic process//organonitrogen compound biosynthetic process//cellular metabolic process//gene expression//cellular amide metabolic process//biological_process//metabolic process//macromolecule biosynthetic process//macromolecule metabolic process//primary metabolic process//peptide metabolic process//translation//organic substance…	GO:0043232//GO:0005622//GO:0032991//GO:0005575//GO:0043229//GO:0030529//GO:0044444//GO:0043226//GO:0005623//GO:1990904//GO:0005840//GO:0005737//GO:0043228//GO:0044464//GO:0044424	intracellular non-membrane-bounded organelle//intracellular//macromolecular complex//cellular_component//intracellular organelle//intracellular ribonucleoprotein complex//cytoplasmic part//organelle//cell//ribonucleoprotein complex//ribosome//cytoplasm//non-membrane-bounded organelle//cell part//intracellular part	GO:0003674//GO:0005198//GO:0003735
AAEL000033	supercont1.1	-	2704040	2706710	2145	37	94	52	66	75	50	68	54	125	0.869589	2.29458	1.32632	1.94334	1.56924	1.0312	1.61892	1.28337	2.77675	1.49683	1.51459	1.89301	60.2005	61.7427	-0.036494	0.87674	1	FALSE	64.5381	76.2759	-0.24108	0.46111	0.92658	FALSE	72.8068	62.6797	0.21608	0.60551	1	FALSE	--	--	--	--	GO:0005515//GO:0005488//GO:0003674
AAEL000034	supercont1.1	-	2813143	2817184	2288	35	76	75	64	100	50	67	34	86	0.771172	1.73924	1.79341	1.76668	1.96155	0.966747	1.49542	0.757543	1.79101	1.43461	1.56499	1.34799	66.2673	65.5645	0.015382	0.90033	1	FALSE	71.0443	57.8459	0.2965	0.51194	0.95324	FALSE	55.2149	66.685	-0.2723	0.68252	1	FALSE	GO:0034641//GO:0090304//GO:0044763//GO:0006259//GO:0007049//GO:0044260//GO:0051716//GO:0006807//GO:0065007//GO:0009987//GO:0046483//GO:0033554//GO:0006302//GO:0006281//GO:0006725//GO:0044710//GO:0050896//GO:1901360//GO:0050794//GO:0050789//GO:0071704//GO:0044237//GO:0006139//GO:0008150//GO:0051726//GO:0043170//GO:0044238//GO:0044699//GO:0008152//GO:0006950//GO:0006974	cellular nitrogen compound metabolic process//nucleic acid metabolic process//single-organism cellular process//DNA metabolic process//cell cycle//cellular macromolecule metabolic process//cellular response to stimulus//nitrogen compound metabolic process//biological regulation//cellular process//heterocycle metabolic process//cellular response to stress//double-strand break repair//DNA repair//c…	GO:0005623//GO:0043226//GO:0019012//GO:0044424//GO:0044464//GO:0043227//GO:0019028//GO:0043231//GO:0005575//GO:0044423//GO:0005622//GO:0005634//GO:0043229	cell//organelle//virion//intracellular part//cell part//membrane-bounded organelle//viral capsid//intracellular membrane-bounded organelle//cellular_component//virion part//intracellular//nucleus//intracellular organelle	GO:0004519//GO:0016787//GO:0030145//GO:0005488//GO:0046914//GO:0046872//GO:0003824//GO:0043169//GO:0003674//GO:0016788//GO:0043167//GO:0004518
AAEL000035	supercont1.1	-	3668288	3668788	438	2	1	0	0	0	14	1	2	5	0.230195	0.119544	0	0	0	1.41401	0.116592	0.232777	0.543939	0.11658	0.471337	0.297769	4.46716	1.00108	2.1578	0.53566	1	FALSE	4.77146	2.42883	0.97417	0.73524	1	FALSE	2.31852	1.01527	1.1913	0.69447	1	FALSE	GO:0044699//GO:0048518//GO:0065008//GO:0030041//GO:0045010//GO:0030029//GO:0008150//GO:0044085//GO:0016043//GO:0008064//GO:0030838//GO:0022607//GO:0044089//GO:0070271//GO:0044087//GO:0030833//GO:0051128//GO:0050794//GO:0034622//GO:0065003//GO:0010638//GO:0050789//GO:0032535//GO:0032970//GO:0006461//GO:0030036//GO:0043254//GO:0032271//GO:0071822//GO:0034314//GO:0006996//GO:0033043//GO:0008154//GO:…	single-organism process//positive regulation of biological process//regulation of biological quality//actin filament polymerization//actin nucleation//actin filament-based process//biological_process//cellular component biogenesis//cellular component organization//regulation of actin polymerization or depolymerization//positive regulation of actin filament polymerization//cellular component assem…	GO:0043229//GO:0015629//GO:0044430//GO:0005575//GO:0032991//GO:0005622//GO:0043232//GO:0043234//GO:0044422//GO:0044424//GO:0044446//GO:0044464//GO:0043228//GO:0005885//GO:0005856//GO:0005623//GO:0043226	intracellular organelle//actin cytoskeleton//cytoskeletal part//cellular_component//macromolecular complex//intracellular//intracellular non-membrane-bounded organelle//protein complex//organelle part//intracellular part//intracellular organelle part//cell part//non-membrane-bounded organelle//Arp2/3 protein complex//cytoskeleton//cell//organelle	GO:0005549//GO:0003674//GO:0008092//GO:0003779//GO:0005515//GO:0005488
AAEL000036	supercont1.1	-	3466057	3473369	1356	0	0	0	0	2	0	0	0	0	0	0	0	0	0.0661951	0	0	0	0	0	0.022065	0	0.543227	0	Inf	0.90232	1	FALSE	0.582666	0	Inf	0.83057	1	FALSE	0	0	NA	NA	NA	NA	--	--	--	--	--
AAEL000037	supercont1.1	-	2191296	2192938	1092	29	34	18	42	333	112	71	15	12	1.3388	1.63027	0.901828	2.42918	13.686	4.53727	3.32031	0.70025	0.523616	1.2903	6.88416	1.51473	141.378	27.5954	2.3571	0.057507	0.52772	FALSE	151.507	32.1208	2.2378	0.066728	0.40225	FALSE	30.653	28.0214	0.1295	0.95113	1	FALSE	GO:0044238//GO:0043170//GO:0008152//GO:0008150//GO:0006508//GO:0019538//GO:0071704	primary metabolic process//macromolecule metabolic process//metabolic process//biological_process//proteolysis//protein metabolic process//organic substance metabolic process	--	--	GO:0008236//GO:0017171//GO:0003824//GO:0004252//GO:0070011//GO:0003674//GO:0016787//GO:0004175//GO:0008233
AAEL000038	supercont1.1	-	2242204	2253857	1176	104	174	101	160	184	68	143	146	150	4.45826	7.74719	4.69881	8.59302	7.02209	2.558	6.20972	6.32893	6.07769	5.63475	6.0577	6.20544	129.554	129.017	0.0059894	0.96735	1	FALSE	138.956	142.918	-0.040557	0.9707	1	FALSE	136.387	131.016	0.057963	0.9861	1	FALSE	GO:0071704//GO:0008150//GO:0008152//GO:0044238//GO:0043170//GO:0019538//GO:0006508	organic substance metabolic process//biological_process//metabolic process//primary metabolic process//macromolecule metabolic process//protein metabolic process//proteolysis	--	--	GO:0004175//GO:0008233//GO:0003674//GO:0017171//GO:0016787//GO:0070011//GO:0004252//GO:0008236//GO:0003824
AAEL000039	supercont1.1	-	3976614	3982459	1665	0	2	0	0	0	0	6	0	0	0	0.0628952	0	0	0	0	0.184026	0	0	0.0209651	0	0.0613421	0	0.567322	#NAME?	0.86323	1	FALSE	0	1.95476	#NAME?	0.41683	0.89628	FALSE	1.86551	0.571315	1.7072	0.73529	1	FALSE	--	--	GO:0005575//GO:0016020	cellular_component//membrane	GO:0022857//GO:0005234//GO:0008066//GO:0003674//GO:0060089//GO:0015075//GO:0004888//GO:0005230//GO:0022892//GO:0005215//GO:0022891//GO:0038023//GO:0004871//GO:0004872//GO:0004970//GO:0022836//GO:0015276//GO:0022803//GO:0005231//GO:0022838//GO:0015267//GO:0022834//GO:0005216
AAEL000041	supercont1.1	+	3895306	3944391	1530	0	0	0	0	0	0	0	0	0	0	0	0	0	0	0	0	0	0	0	0	0	0	0	NA	NA	NA	NA	0	0	NA	NA	NA	NA	0	0	NA	NA	NA	NA	GO:0016070//GO:0044237//GO:0044260//GO:1901362//GO:0018130//GO:0044271//GO:2001141//GO:0080090//GO:0009889//GO:0050794//GO:0019438//GO:0097659//GO:0019222//GO:0034641//GO:1901576//GO:0090304//GO:0031323//GO:0060255//GO:0031326//GO:0071704//GO:0050789//GO:0051171//GO:0034645//GO:0034654//GO:0006725//GO:0051252//GO:0044238//GO:2000112//GO:0043170//GO:0009058//GO:0010468//GO:1901360//GO:0044249//GO:…	RNA metabolic process//cellular metabolic process//cellular macromolecule metabolic process//organic cyclic compound biosynthetic process//heterocycle biosynthetic process//cellular nitrogen compound biosynthetic process//regulation of RNA biosynthetic process//regulation of primary metabolic process//regulation of biosynthetic process//regulation of cellular process//aromatic compound biosynthet…	--	--	GO:0005488//GO:0003674//GO:0003700//GO:0043565//GO:0003677//GO:0097159//GO:0003676//GO:1901363//GO:0001071
AAEL000042	supercont1.1	-	5359776	5361376	1544	1	8	7	6	13	5	12	4	20	0.0326507	0.271297	0.248042	0.245435	0.377878	0.143259	0.396896	0.132068	0.617216	0.183996	0.255524	0.38206	7.29687	5.56347	0.39129	0.76924	1	FALSE	7.82299	10.7757	-0.46199	0.60249	0.99592	FALSE	10.2871	5.65603	0.86298	0.36497	1	FALSE	GO:0051234//GO:0006139//GO:0009167//GO:0008150//GO:0046390//GO:1901137//GO:0009142//GO:0016192//GO:0098660//GO:0006811//GO:0044238//GO:0009199//GO:0044699//GO:0008152//GO:0046129//GO:1901135//GO:0009201//GO:0009126//GO:0015992//GO:0006793//GO:0034654//GO:0072522//GO:0071704//GO:0009165//GO:0006163//GO:0098655//GO:0009205//GO:0009152//GO:0015672//GO:0015985//GO:0044765//GO:0044237//GO:0009117//GO:…	establishment of localization//nucleobase-containing compound metabolic process//purine ribonucleoside monophosphate metabolic process//biological_process//ribose phosphate biosynthetic process//carbohydrate derivative biosynthetic process//nucleoside triphosphate biosynthetic process//vesicle-mediated transport//inorganic ion transmembrane transport//ion transport//primary metabolic process//rib…	GO:0044425//GO:0045259//GO:0098796//GO:0032991//GO:0005575//GO:0005622//GO:0016469//GO:0044424//GO:0044464//GO:0016020//GO:0045263//GO:0043234//GO:0005623//GO:0033177	membrane part//proton-transporting ATP synthase complex//membrane protein complex//macromolecular complex//cellular_component//intracellular//proton-transporting two-sector ATPase complex//intracellular part//cell part//membrane//proton-transporting ATP synthase complex, coupling factor F(o)//protein complex//cell//proton-transporting two-sector ATPase complex, proton-transporting domain	GO:0022890//GO:1901363//GO:0022891//GO:0005215//GO:0022892//GO:0022857//GO:0015075//GO:0003674//GO:0015077//GO:0003676//GO:0097159//GO:0008324//GO:0015078//GO:0005488
AAEL000043	supercont1.1	+	2321199	2323613	1305	4	4	0	0	1	4	4	3	1	0.154521	0.160491	0	0	0.034391	0.135596	0.156528	0.117191	0.0365127	0.105004	0.0566625	0.103411	1.54795	2.56948	-0.73112	0.79821	1	FALSE	1.65461	2.72866	-0.7217	0.83927	1	FALSE	2.6035	2.60186	0.00090806	0.98834	1	FALSE	GO:0050907//GO:0051606//GO:0050896//GO:0042221//GO:0003008//GO:0009593//GO:0050909//GO:0044707//GO:0050906//GO:0050912//GO:0007600//GO:0044699//GO:0050877//GO:0007606//GO:0008150//GO:0032501	detection of chemical stimulus involved in sensory perception//detection of stimulus//response to stimulus//response to chemical//system process//detection of chemical stimulus//sensory perception of taste//single-multicellular organism process//detection of stimulus involved in sensory perception//detection of chemical stimulus involved in sensory perception of taste//sensory perception//single-…	GO:0031224//GO:0016021//GO:0016020//GO:0005575//GO:0044425	intrinsic component of membrane//integral component of membrane//membrane//cellular_component//membrane part	GO:0004872//GO:0004871//GO:0038023//GO:0004930//GO:0003674//GO:0060089//GO:0008527//GO:0004888
AAEL000044	supercont1.1	-	5118597	5120442	1734	7273	9374	8362	13791	12555	22416	10813	14770	10069	215.171	288.043	268.481	511.163	330.676	581.952	324.056	441.871	281.56	257.232	474.597	349.162	15551.5	8774.55	0.82566	0.043528	0.44699	FALSE	16656.6	11909.7	0.48395	0.24679	0.74426	FALSE	11364.3	8921.83	0.34909	0.42869	1	FALSE	--	--	--	--	GO:0003824//GO:0003674
AAEL000045	supercont1.1	+	560028	560897	747	218	120	98	47	91	78	24	20	76	14.7121	8.41129	7.1776	3.97384	5.46735	4.61926	1.64072	1.36488	4.84783	10.1003	4.68682	2.61781	66.6074	153.334	-1.2029	0.042976	0.44364	FALSE	71.3591	35.7658	0.99652	0.033359	0.26888	FALSE	34.1444	155.89	-2.1908	0.003692	0.11752	FALSE	GO:0044699//GO:0023052//GO:0008150//GO:0007154//GO:0044700//GO:0050789//GO:0050794//GO:0050896//GO:0009987//GO:0065007//GO:0051716//GO:0007186//GO:0007165//GO:0044763	single-organism process//signaling//biological_process//cell communication//single organism signaling//regulation of biological process//regulation of cellular process//response to stimulus//cellular process//biological regulation//cellular response to stimulus//G-protein coupled receptor signaling pathway//signal transduction//single-organism cellular process	GO:0044425//GO:0005575//GO:0016020//GO:0031224//GO:0016021	membrane part//cellular_component//membrane//intrinsic component of membrane//integral component of membrane	GO:0004888//GO:0003674//GO:0060089//GO:0004871//GO:0038023//GO:0004930//GO:0004872
AAEL000046	supercont1.1	-	2782314	2783377	1005	42	154	39	68	90	64	95	53	132	2.1068	8.02337	2.12311	4.27342	4.01913	2.81717	4.82726	2.6884	6.25839	4.08442	3.70324	4.59135	69.4653	75.1043	-0.1126	0.7016	1	FALSE	74.4568	86.5479	-0.2171	0.50129	0.94895	FALSE	82.6117	76.0607	0.1192	0.95272	1	FALSE	GO:0044270//GO:1901575//GO:0090305//GO:0022411//GO:0044237//GO:0008219//GO:0071704//GO:0019439//GO:0016265//GO:1901361//GO:0008152//GO:0044238//GO:0043170//GO:0044699//GO:0044265//GO:0016043//GO:0006139//GO:0012501//GO:0008150//GO:0044248//GO:0009057//GO:0044260//GO:0000737//GO:0046700//GO:0006308//GO:0006259//GO:0006915//GO:0044763//GO:0090304//GO:0034641//GO:0006921//GO:0009056//GO:1901360//GO:…	cellular nitrogen compound catabolic process//organic substance catabolic process//nucleic acid phosphodiester bond hydrolysis//cellular component disassembly//cellular metabolic process//cell death//organic substance metabolic process//aromatic compound catabolic process//death//organic cyclic compound catabolic process//metabolic process//primary metabolic process//macromolecule metabolic proce…	GO:0005622//GO:0005575//GO:0043227//GO:0043231//GO:0043229//GO:0005634//GO:0005737//GO:0043226//GO:0005623//GO:0044464//GO:0044424	intracellular//cellular_component//membrane-bounded organelle//intracellular membrane-bounded organelle//intracellular organelle//nucleus//cytoplasm//organelle//cell//cell part//intracellular part	GO:0003674//GO:0016787//GO:0003824
AAEL000047	supercont1.1	-	3910207	3926596	1695	0	0	0	0	0	0	0	0	0	0	0	0	0	0	0	0	0	0	0	0	0	0	0	NA	NA	NA	NA	0	0	NA	NA	NA	NA	0	0	NA	NA	NA	NA	--	--	GO:0005575//GO:0016020	cellular_component//membrane	GO:0003674//GO:0060089//GO:0015075//GO:0005234//GO:0008066//GO:0016772//GO:0022857//GO:0005215//GO:0022892//GO:0022891//GO:0005230//GO:0004888//GO:0003887//GO:0016779//GO:0022838//GO:0016740//GO:0015276//GO:0022836//GO:0034061//GO:0022803//GO:0005231//GO:0004970//GO:0038023//GO:0004871//GO:0004872//GO:0003824//GO:0022834//GO:0015267//GO:0005216
AAEL000048	supercont1.1	+	2297653	2299068	1302	1	2	2	1	6	1	1	0	3	0.0387194	0.0804306	0.0840413	0.048509	0.206822	0.0339772	0.0392222	0	0.10979	0.0677304	0.0964359	0.0496709	2.31051	1.76474	0.38876	0.89986	1	FALSE	2.47741	1.12383	1.1404	0.69328	1	FALSE	1.07319	1.79497	-0.74206	0.93041	1	FALSE	GO:0050906//GO:0050907//GO:0050912//GO:0044707//GO:0009593//GO:0007606//GO:0008150//GO:0032501//GO:0050909//GO:0051606//GO:0007600//GO:0044699//GO:0050877//GO:0003008//GO:0050896//GO:0042221	detection of stimulus involved in sensory perception//detection of chemical stimulus involved in sensory perception//detection of chemical stimulus involved in sensory perception of taste//single-multicellular organism process//detection of chemical stimulus//sensory perception of chemical stimulus//biological_process//multicellular organismal process//sensory perception of taste//detection of st…	GO:0016021//GO:0005575//GO:0031224//GO:0016020//GO:0044425	integral component of membrane//cellular_component//intrinsic component of membrane//membrane//membrane part	GO:0004872//GO:0004871//GO:0038023//GO:0004930//GO:0008527//GO:0016740//GO:0003674//GO:0060089//GO:0004888//GO:0016757//GO:0003824
AAEL000049	supercont1.1	-	565618	567336	1663	1066	902	915	780	1244	1228	1266	1340	1460	32.315	28.3999	30.1025	29.6234	33.5725	32.6667	38.8763	41.0768	41.8326	30.2725	31.9542	40.5952	1011.88	1021.95	-0.014286	0.89535	1	FALSE	1084.05	1318.73	-0.28272	0.33946	0.83936	FALSE	1258.49	1039.47	0.27584	0.30761	1	FALSE	--	--	--	--	GO:1901363//GO:0003674//GO:0003676//GO:0097159//GO:0005488
AAEL000050	supercont1.1	+	2988303	2989379	998	184	163	163	208	252	204	166	153	255	9.29451	8.55183	8.93574	13.1633	11.3325	9.04271	8.49416	7.81529	12.1749	8.92736	11.1795	9.49477	208.783	180.594	0.20926	0.46592	1	FALSE	223.771	181.048	0.30565	0.35558	0.85536	FALSE	172.798	183.683	-0.088132	0.93452	1	FALSE	GO:0006955//GO:0008150//GO:0050896//GO:0002376	immune response//biological_process//response to stimulus//immune system process	GO:0005576//GO:0005575	extracellular region//cellular_component	GO:0070851//GO:0005138//GO:0005126//GO:0005102//GO:0003674//GO:0005515//GO:0005488
AAEL000051	supercont1.1	+	4124658	4140143	348	29	21	38	59	85	87	29	34	27	4.20105	3.15967	5.97418	10.7079	10.9621	11.0596	4.25561	4.98063	3.69691	4.44497	10.9099	4.31105	72.1904	32.2948	1.1605	0.012255	0.1951	FALSE	77.3416	29.771	1.3773	0.0011822	0.023734	UP	28.4087	32.8963	-0.21159	0.79068	1	FALSE	--	--	--	--	GO:0005488//GO:0003674//GO:0005549
AAEL000053	supercont1.1	-	1486827	1514623	3538	5	97	41	55	71	51	79	29	142	0.0712445	1.43554	0.634015	0.981834	0.90065	0.637692	1.14028	0.417854	1.91243	0.713601	0.840059	1.15685	55.4539	46.5021	0.25399	0.81247	1	FALSE	59.4391	74.7196	-0.33007	0.4172	0.89628	FALSE	71.332	47.1392	0.59762	0.46413	1	FALSE	GO:0018130//GO:0044237//GO:0050789//GO:0034645//GO:0034654//GO:0051171//GO:0071704//GO:0031323//GO:0097659//GO:0050794//GO:0009889//GO:0009059//GO:0008152//GO:0006355//GO:0010468//GO:2000112//GO:0043170//GO:0044238//GO:0010467//GO:0006139//GO:0019219//GO:0008150//GO:0010556//GO:0080090//GO:2001141//GO:0044271//GO:0044260//GO:1901362//GO:0016070//GO:0031326//GO:0060255//GO:1901576//GO:0034641//GO:…	heterocycle biosynthetic process//cellular metabolic process//regulation of biological process//cellular macromolecule biosynthetic process//nucleobase-containing compound biosynthetic process//regulation of nitrogen compound metabolic process//organic substance metabolic process//regulation of cellular metabolic process//nucleic acid-templated transcription//regulation of cellular process//regul…	--	--	GO:0003700//GO:0003674//GO:0043565//GO:1901363//GO:0005488//GO:0003676//GO:0097159//GO:0003677//GO:0001071
AAEL000054	supercont1.1	-	2834690	2865077	9568	279	435	197	299	377	307	337	311	410	1.47002	2.38051	1.12647	1.97371	1.76838	1.41944	1.79867	1.657	2.04182	1.659	1.72051	1.8325	308.519	306.085	0.011429	0.9218	1	FALSE	330.654	339.056	-0.036202	0.91537	1	FALSE	323.584	310.639	0.058903	0.97615	1	FALSE	GO:0006979//GO:0070887//GO:0051716//GO:0009987//GO:0033554//GO:0008150//GO:0006950//GO:0042221//GO:0050896//GO:0034599	response to oxidative stress//cellular response to chemical stimulus//cellular response to stimulus//cellular process//cellular response to stress//biological_process//response to stress//response to chemical//response to stimulus//cellular response to oxidative stress	GO:0043227//GO:0005789//GO:0043226//GO:0043231//GO:0042175//GO:0005623//GO:0044432//GO:0012505//GO:0005622//GO:0005737//GO:0005783//GO:0005575//GO:0044464//GO:0016020//GO:0044446//GO:0098588//GO:0044424//GO:0005634//GO:0043229//GO:0044422//GO:0031090//GO:0044444//GO:0044425	membrane-bounded organelle//endoplasmic reticulum membrane//organelle//intracellular membrane-bounded organelle//nuclear outer membrane-endoplasmic reticulum membrane network//cell//endoplasmic reticulum part//endomembrane system//intracellular//cytoplasm//endoplasmic reticulum//cellular_component//cell part//membrane//intracellular organelle part//bounding membrane of organelle//intracellular pa…	GO:0003674//GO:0005488//GO:0005515
AAEL000055	supercont1.1	-	4165539	4169600	1578	567	560	544	427	678	604	576	433	717	18.114	18.5816	18.861	17.0905	19.2832	16.9328	18.6405	13.9883	21.6504	18.5189	17.7688	18.0931	531.346	590.366	-0.15196	0.70674	1	FALSE	569.308	545.738	0.061002	0.82377	1	FALSE	520.865	600.42	-0.20506	0.61037	1	FALSE	--	--	--	--	--
AAEL000056	supercont1.1	+	764426	768048	432	0	0	2	0	0	0	0	0	1	0	0	0.253291	0	0	0	0	0	0.110299	0.0844304	0	0.0367663	0	0.838707	#NAME?	0.82489	1	FALSE	0	0.266012	#NAME?	1	1	FALSE	0.254089	0.858846	-1.7571	0.96541	1	FALSE	--	--	--	--	--
AAEL000057	supercont1.1	+	3588966	3620514	2580	0	1	0	0	1	1	0	1	0	0	0.0202947	0	0	0.0173955	0.0171466	0	0.019759	0	0.0067649	0.011514	0.00658633	0.590697	0.283661	1.0582	1	1	FALSE	0.632152	0.38649	0.70984	0.98988	1	FALSE	0.368577	0.285658	0.36768	1	1	FALSE	GO:0044700//GO:0051716//GO:0007154//GO:0044763//GO:0050794//GO:0050789//GO:0007165//GO:0023052//GO:0044699//GO:0050896//GO:0065007//GO:0009987//GO:0008150	single organism signaling//cellular response to stimulus//cell communication//single-organism cellular process//regulation of cellular process//regulation of biological process//signal transduction//signaling//single-organism process//response to stimulus//biological regulation//cellular process//biological_process	--	--	GO:0005488//GO:0005515//GO:0003674
AAEL000058	supercont1.1	+	3238279	3240149	1810	0	0	0	0	0	0	0	0	1	0	0	0	0	0	0	0	0	0.0263255	0	0	0.00877515	0	0	NA	NA	NA	NA	0	0.266012	#NAME?	1	1	FALSE	0.254089	0	Inf	1	1	FALSE	GO:0009100//GO:0016070//GO:0044237//GO:0044260//GO:1901362//GO:0043412//GO:0018130//GO:0044271//GO:0019538//GO:0019438//GO:0044763//GO:0070085//GO:0097659//GO:0034641//GO:1901576//GO:0090304//GO:0071704//GO:0006464//GO:0034654//GO:0034645//GO:0006725//GO:0044699//GO:0005975//GO:0044238//GO:0043170//GO:0036211//GO:0044710//GO:0009058//GO:1901360//GO:1901135//GO:0044249//GO:0006486//GO:0009059//GO:…	glycoprotein metabolic process//RNA metabolic process//cellular metabolic process//cellular macromolecule metabolic process//organic cyclic compound biosynthetic process//macromolecule modification//heterocycle biosynthetic process//cellular nitrogen compound biosynthetic process//protein metabolic process//aromatic compound biosynthetic process//single-organism cellular process//glycosylation//n…	GO:0005575//GO:0005622//GO:0005623//GO:0043226//GO:0043231//GO:0043227//GO:0043229//GO:0005634//GO:0044424//GO:0016020//GO:0044464	cellular_component//intracellular//cell//organelle//intracellular membrane-bounded organelle//membrane-bounded organelle//intracellular organelle//nucleus//intracellular part//membrane//cell part	GO:0016740//GO:0046914//GO:0005488//GO:0008270//GO:0003674//GO:0004576//GO:0043169//GO:0016757//GO:0003824//GO:0003677//GO:0097159//GO:0003676//GO:1901363//GO:0043167//GO:0046872//GO:0016758
AAEL000059	supercont1.1	-	2126420	2130121	1086	22	20	16	26	218	37	25	14	14	1.02125	0.964278	0.806053	1.51209	9.00912	1.5072	1.17558	0.657178	0.614261	0.930527	4.00947	0.815674	80.4233	20.2745	1.988	0.17553	0.91878	FALSE	86.2243	17.2799	2.319	0.13585	0.57492	FALSE	16.4903	20.6097	-0.3217	0.64992	1	FALSE	GO:0043170//GO:0044238//GO:0008152//GO:0008150//GO:0006508//GO:0019538//GO:0071704	macromolecule metabolic process//primary metabolic process//metabolic process//biological_process//proteolysis//protein metabolic process//organic substance metabolic process	--	--	GO:0003824//GO:0017171//GO:0008236//GO:0004252//GO:0003674//GO:0070011//GO:0008233//GO:0004175//GO:0016787
AAEL000060	supercont1.1	+	2593701	2614090	1326	1	0	1	0	0	0	0	0	1	0.0380186	0	0.0412601	0	0	0	0	0	0.0359344	0.0264262	0	0.0119781	0	0.778062	#NAME?	0.83275	1	FALSE	0	0.266012	#NAME?	1	1	FALSE	0.254089	0.79423	-1.6442	0.96511	1	FALSE	GO:0044707//GO:0050912//GO:0050906//GO:0050877//GO:0044699//GO:0007600//GO:0032501//GO:0007606//GO:0008150//GO:0050907//GO:0042221//GO:0050896//GO:0003008//GO:0051606//GO:0050909//GO:0009593	single-multicellular organism process//detection of chemical stimulus involved in sensory perception of taste//detection of stimulus involved in sensory perception//neurological system process//single-organism process//sensory perception//multicellular organismal process//sensory perception of chemical stimulus//biological_process//detection of chemical stimulus involved in sensory perception//re…	GO:0005575//GO:0044425//GO:0031224//GO:0016021//GO:0016020	cellular_component//membrane part//intrinsic component of membrane//integral component of membrane//membrane	GO:0003674//GO:0060089//GO:0008527//GO:0004888//GO:0004872//GO:0038023//GO:0004871//GO:0004930
AAEL000061	supercont1.1	+	454156	459075	746	0	0	1	1	0	1	0	0	1	0	0	0.073339	0.0846631	0	0.0593007	0	0	0.0638728	0.0244463	0.0479879	0.0212909	0.68083	0.419353	0.69913	1	1	FALSE	0.729413	0.266012	1.4552	0.98982	1	FALSE	0.254089	0.429423	-0.75706	1	1	FALSE	--	--	--	--	--
AAEL000062	supercont1.1	+	891842	940069	4501	264	213	139	145	200	192	114	114	134	2.95688	2.47784	1.68958	2.03466	1.99424	1.88708	1.29342	1.29116	1.41857	2.37477	1.97199	1.33438	168.04	213.409	-0.34482	0.31154	1	FALSE	180.05	116.846	0.62379	0.049495	0.33929	FALSE	111.511	216.844	-0.95948	0.005748	0.16067	FALSE	GO:0006807//GO:0006139//GO:0006753//GO:0065007//GO:0009987//GO:0052652//GO:0009259//GO:0046483//GO:0008150//GO:0009260//GO:0044281//GO:0046390//GO:1901137//GO:1901564//GO:0072521//GO:0055086//GO:0009190//GO:0019693//GO:0023052//GO:0044238//GO:0006725//GO:0009150//GO:0044699//GO:0090407//GO:0008152//GO:0044249//GO:1901135//GO:0050896//GO:0009058//GO:0044710//GO:1901360//GO:1901576//GO:0034641//GO:…	nitrogen compound metabolic process//nucleobase-containing compound metabolic process//nucleoside phosphate metabolic process//biological regulation//cellular process//cyclic purine nucleotide metabolic process//ribonucleotide metabolic process//heterocycle metabolic process//biological_process//ribonucleotide biosynthetic process//small molecule metabolic process//ribose phosphate biosynthetic p…	GO:0044464//GO:0016020//GO:0005623//GO:0005886//GO:0071944//GO:0005575	cell part//membrane//cell//plasma membrane//cell periphery//cellular_component	GO:0016849//GO:0046872//GO:0043167//GO:0003677//GO:0009975//GO:0003824//GO:0043169//GO:0003676//GO:1901363//GO:0097159//GO:0004016//GO:0016829//GO:0005488//GO:0003674
AAEL000063	supercont1.1	-	3682190	3699737	1821	2	0	0	1	0	0	1	0	0	0.0553681	0	0	0.0346835	0	0	0.0280436	0	0	0.018456	0.0115612	0.00934785	0.361747	0.717416	-0.98783	0.9778	1	FALSE	0.388595	0.325793	0.25431	1	1	FALSE	0.310919	0.729615	-1.2306	0.96507	1	FALSE	--	--	GO:0016020//GO:0005575	membrane//cellular_component	GO:0015267//GO:0022834//GO:0005230//GO:0005216//GO:0022892//GO:0005215//GO:0022891//GO:0004888//GO:0005234//GO:0008066//GO:0022836//GO:0015276//GO:0022803//GO:0005231//GO:0003674//GO:0060089//GO:0015075//GO:0022838//GO:0038023//GO:0004871//GO:0004872//GO:0004970//GO:0022857
AAEL000064	supercont1.1	+	35414	53420	1647	47	215	42	65	310	100	136	28	113	1.43861	6.83513	1.39518	2.4926	8.44741	2.686	4.21685	0.86666	3.26918	3.22297	4.542	2.78423	139.622	95.4592	0.54857	0.59212	1	FALSE	149.654	85.189	0.81289	0.32338	0.82433	FALSE	81.3172	96.5981	-0.24843	0.6916	1	FALSE	GO:0009110//GO:0034641//GO:1901576//GO:0033014//GO:0044763//GO:0019438//GO:0044283//GO:0071704//GO:1901362//GO:0044237//GO:0042364//GO:0006766//GO:0044711//GO:1901566//GO:0044271//GO:0018130//GO:0006807//GO:0046483//GO:0009235//GO:0009987//GO:0009236//GO:0008150//GO:0044281//GO:1901564//GO:0044699//GO:0006725//GO:0008152//GO:0044249//GO:1901360//GO:0006767//GO:0009058//GO:0044710//GO:0033013	vitamin biosynthetic process//cellular nitrogen compound metabolic process//organic substance biosynthetic process//tetrapyrrole biosynthetic process//single-organism cellular process//aromatic compound biosynthetic process//small molecule biosynthetic process//organic substance metabolic process//organic cyclic compound biosynthetic process//cellular metabolic process//water-soluble vitamin bios…	--	--	GO:0003674//GO:0003824
AAEL000065	supercont1.1	-	4178340	4196907	2480	39	71	35	51	57	52	70	60	102	0.792779	1.49902	0.772129	1.29883	1.03152	0.927578	1.44142	1.23334	1.95976	1.02131	1.08598	1.54484	50.5234	48.8069	0.049866	1	1	FALSE	54.1469	73.1282	-0.43355	0.26236	0.76273	FALSE	69.7961	49.539	0.49458	0.29075	1	FALSE	--	--	--	--	GO:0046872//GO:0043167//GO:0043169//GO:0005488//GO:0003674
AAEL000066	supercont1.1	+	4007359	4016467	1881	1	5	1	0	0	0	6	0	0	0.026801	0.139182	0.0290861	0	0	0	0.162894	0	0	0.065023	0	0.054298	0	2.19637	#NAME?	0.34893	1	FALSE	0	1.95476	#NAME?	0.41683	0.89628	FALSE	1.86551	2.22252	-0.25262	0.91421	1	FALSE	--	--	GO:0005575//GO:0016020	cellular_component//membrane	GO:0004970//GO:0022857//GO:0038023//GO:0004871//GO:0004872//GO:0003674//GO:0060089//GO:0015075//GO:0022838//GO:0005234//GO:0008066//GO:0022836//GO:0015276//GO:0022803//GO:0005231//GO:0004888//GO:0022892//GO:0005215//GO:0022891//GO:0015267//GO:0022834//GO:0005230//GO:0005216
AAEL000067	supercont1.1	-	3074291	3098740	4866	0	2	1	1	4	2	0	0	0	0	0.0215209	0.0112435	0.0129796	0.036893	0.0181826	0	0	0	0.0109215	0.0226851	0	2.08637	0.986675	1.0803	0.79345	1	FALSE	2.23556	0	Inf	0.25906	0.75926	FALSE	0	1.00074	#NAME?	0.64014	1	FALSE	--	--	--	--	--
AAEL000068	supercont1.1	+	2766837	2779903	600	17307	15783	21540	15168	23373	20554	14012	13964	19701	1577.74	1494.4	2131.05	1732.35	1896.9	1644.26	1293.95	1287.27	1697.53	1734.4	1757.84	1426.25	18393.8	19718.1	-0.10029	0.93994	1	FALSE	19708.7	15202.7	0.37451	0.12348	0.54982	FALSE	14509.2	20072	-0.46822	0.27169	1	FALSE	--	--	--	--	GO:0005515//GO:0005488//GO:0003677//GO:0097159//GO:0003676//GO:0003674//GO:1901363
AAEL000069	supercont1.1	-	2384259	2396506	1068	9	3	11	2	5	5	5	4	2	0.424826	0.147079	0.563502	0.118275	0.210114	0.207108	0.239079	0.19093	0.0892305	0.378469	0.178499	0.17308	3.67698	8.69224	-1.2412	0.44758	1	FALSE	3.93795	3.70695	0.087211	0.95799	1	FALSE	3.53708	8.86389	-1.3254	0.3069	1	FALSE	GO:0050909//GO:0032501//GO:0008150//GO:0009593//GO:0007606//GO:0050896//GO:0042221//GO:0003008//GO:0050877//GO:0007600//GO:0044699//GO:0051606//GO:0050912//GO:0050907//GO:0050906//GO:0044707	sensory perception of taste//multicellular organismal process//biological_process//detection of chemical stimulus//sensory perception of chemical stimulus//response to stimulus//response to chemical//system process//neurological system process//sensory perception//single-organism process//detection of stimulus//detection of chemical stimulus involved in sensory perception of taste//detection of c…	GO:0016020//GO:0044425//GO:0016021//GO:0031224//GO:0005575	membrane//membrane part//integral component of membrane//intrinsic component of membrane//cellular_component	GO:0004888//GO:0008527//GO:0004930//GO:0004871//GO:0038023//GO:0004872//GO:0060089//GO:0003674
AAEL000070	supercont1.1	-	97841	103029	1893	50	131	54	54	67	53	97	77	94	1.33155	3.62345	1.56069	1.80167	1.58847	1.23858	2.61676	2.0736	2.36609	2.1719	1.54291	2.35215	54.6438	77.7401	-0.5086	0.20294	0.96764	FALSE	58.5668	86.3668	-0.56039	0.16411	0.62992	FALSE	82.424	78.8503	0.063947	0.97942	1	FALSE	--	--	--	--	GO:0003674//GO:0005515//GO:0005488
AAEL000071	supercont1.1	-	4056982	4057610	426	0	0	0	2	0	0	0	0	0	0	0	0	0.29652	0	0	0	0	0	0	0.0988399	0	0.723494	0	Inf	0.87469	1	FALSE	0.777189	0	Inf	0.79807	1	FALSE	0	0	NA	NA	NA	NA	GO:0050896//GO:0023052//GO:0044699//GO:0065007//GO:0008150//GO:0009987//GO:0007154//GO:0044700//GO:0051716//GO:0050789//GO:0007165//GO:0007186//GO:0044763//GO:0050794	response to stimulus//signaling//single-organism process//biological regulation//biological_process//cellular process//cell communication//single organism signaling//cellular response to stimulus//regulation of biological process//signal transduction//G-protein coupled receptor signaling pathway//single-organism cellular process//regulation of cellular process	GO:0044425//GO:0016020//GO:0005575//GO:0031224//GO:0016021	membrane part//membrane//cellular_component//intrinsic component of membrane//integral component of membrane	GO:0004888//GO:0003674//GO:0060089//GO:0005488//GO:0005549//GO:0004872//GO:0004871//GO:0038023//GO:0004930
AAEL000072	supercont1.1	+	529205	531069	453	9	13	10	8	9	12	6	2	2	1.00158	1.50261	1.20775	1.11538	0.891662	1.17188	0.676388	0.225069	0.210371	1.23731	1.05964	0.37061	9.16749	11.1095	-0.27719	0.81366	1	FALSE	9.82058	3.25977	1.591	0.16115	0.62482	FALSE	3.11085	11.291	-1.8598	0.095891	0.8224	FALSE	GO:0006508//GO:0071704//GO:0019538//GO:0008152//GO:0043170//GO:0044238//GO:0008150	proteolysis//organic substance metabolic process//protein metabolic process//metabolic process//macromolecule metabolic process//primary metabolic process//biological_process	--	--	GO:0004181//GO:0003674//GO:0070011//GO:0046914//GO:0004180//GO:0005488//GO:0008237//GO:0008270//GO:0008233//GO:0008235//GO:0016787//GO:0003824//GO:0043169//GO:0043167//GO:0046872//GO:0008238
AAEL000073	supercont1.1	-	4140321	4154466	613	0	0	0	0	0	0	0	0	0	0	0	0	0	0	0	0	0	0	0	0	0	0	0	NA	NA	NA	NA	0	0	NA	NA	NA	NA	0	0	NA	NA	NA	NA	--	--	--	--	GO:0003674//GO:0005549//GO:0005488
AAEL000074	supercont1.1	+	2229604	2241653	1119	115	118	75	68	428	137	140	55	89	5.18092	5.52146	3.66695	3.83806	17.166	5.41613	6.38912	2.50563	3.78978	4.78978	8.80674	4.22818	184.564	106.175	0.79768	0.30666	1	FALSE	197.807	90.5431	1.1274	0.20769	0.70007	FALSE	86.4144	107.867	-0.31991	0.41332	1	FALSE	GO:0008152//GO:0043170//GO:0044238//GO:0008150//GO:0071704//GO:0006508//GO:0019538	metabolic process//macromolecule metabolic process//primary metabolic process//biological_process//organic substance metabolic process//proteolysis//protein metabolic process	--	--	GO:0017171//GO:0003674//GO:0008233//GO:0004175//GO:0003824//GO:0008236//GO:0070011//GO:0004252//GO:0016787
AAEL000075	supercont1.1	+	2348850	2350981	1305	2	5	0	1	3	3	2	0	1	0.0772607	0.200614	0	0.0483975	0.103173	0.101697	0.0782641	0	0.0365127	0.092625	0.0844226	0.0382589	2.13384	2.13572	-0.0012732	1	1	FALSE	2.28505	0.917599	1.3163	0.66587	1	FALSE	0.875927	2.1579	-1.3007	0.63758	1	FALSE	GO:0044707//GO:0050907//GO:0050906//GO:0050912//GO:0044699//GO:0007600//GO:0051606//GO:0042221//GO:0050896//GO:0003008//GO:0050877//GO:0008150//GO:0007606//GO:0009593//GO:0050909//GO:0032501	single-multicellular organism process//detection of chemical stimulus involved in sensory perception//detection of stimulus involved in sensory perception//detection of chemical stimulus involved in sensory perception of taste//single-organism process//sensory perception//detection of stimulus//response to chemical//response to stimulus//system process//neurological system process//biological_pro…	GO:0031224//GO:0005575//GO:0016021//GO:0044425//GO:0016020	intrinsic component of membrane//cellular_component//integral component of membrane//membrane part//membrane	GO:0060089//GO:0003674//GO:0008527//GO:0004930//GO:0038023//GO:0004871//GO:0004872//GO:0004888
AAEL000076	supercont1.1	-	2802670	2803837	1101	0	0	0	0	0	0	0	0	0	0	0	0	0	0	0	0	0	0	0	0	0	0	0	NA	NA	NA	NA	0	0	NA	NA	NA	NA	0	0	NA	NA	NA	NA	GO:0006396//GO:0034660//GO:0071704//GO:0044403//GO:0044237//GO:0044711//GO:0043412//GO:0006139//GO:0008150//GO:0009877//GO:0044723//GO:0006400//GO:0010467//GO:0044238//GO:0043170//GO:0044699//GO:0009312//GO:0008152//GO:0044419//GO:0034641//GO:1901576//GO:0090304//GO:0019538//GO:0034470//GO:0009451//GO:0008033//GO:0006464//GO:0044260//GO:0016070//GO:0051704//GO:0006807//GO:0009987//GO:0046483//GO:…	RNA processing//ncRNA metabolic process//organic substance metabolic process//symbiosis, encompassing mutualism through parasitism//cellular metabolic process//single-organism biosynthetic process//macromolecule modification//nucleobase-containing compound metabolic process//biological_process//nodulation//single-organism carbohydrate metabolic process//tRNA modification//gene expression//primary…	--	--	GO:0016278//GO:0016423//GO:0051998//GO:0003674//GO:0008168//GO:0016279//GO:0008173//GO:0008757//GO:0008175//GO:0016740//GO:0042054//GO:0008176//GO:0008171//GO:0008170//GO:0008276//GO:0016741//GO:0010340//GO:0003824//GO:0004719//GO:0018024
AAEL000077	supercont1.1	-	2743467	2750949	1826	648	601	527	609	875	802	653	528	773	17.8901	17.2336	15.79	21.0644	21.5062	19.43	18.2623	14.7407	20.1713	16.9713	20.6669	17.7247	713.87	623.922	0.1943	0.41361	1	FALSE	764.907	622.437	0.29736	0.25991	0.76	FALSE	594.05	634.381	-0.094766	0.83471	1	FALSE	GO:0044699//GO:0006811//GO:0051179//GO:0008150//GO:0009987//GO:1902578//GO:0051234//GO:0006812//GO:0006810//GO:0055085//GO:0044765//GO:0044763	single-organism process//ion transport//localization//biological_process//cellular process//single-organism localization//establishment of localization//cation transport//transport//transmembrane transport//single-organism transport//single-organism cellular process	GO:0044425//GO:0016020//GO:0005575//GO:0031224//GO:0016021	membrane part//membrane//cellular_component//intrinsic component of membrane//integral component of membrane	GO:0005215//GO:0022892//GO:0022891//GO:0003674//GO:0015075//GO:0008324//GO:0022857
AAEL000078	supercont1.1	-	5580687	5581862	1176	0	1	1	1	2	1	4	0	0	0	0.0445241	0.0465229	0.0537064	0.076327	0.0376176	0.173698	0	0	0.030349	0.0558837	0.0578994	1.22406	0.703014	0.80004	0.93197	1	FALSE	1.31208	1.30317	0.0098251	1	1	FALSE	1.24368	0.715081	0.79843	0.9294	1	FALSE	GO:0071704//GO:0006082//GO:0044237//GO:0019752//GO:0008150//GO:0044699//GO:0043436//GO:0008152//GO:0044763//GO:0009987//GO:0044281//GO:0044710	organic substance metabolic process//organic acid metabolic process//cellular metabolic process//carboxylic acid metabolic process//biological_process//single-organism process//oxoacid metabolic process//metabolic process//single-organism cellular process//cellular process//small molecule metabolic process//single-organism metabolic process	--	--	GO:0016829//GO:0004451//GO:0003674//GO:0016830//GO:0005488//GO:0005515//GO:0016833//GO:0003824
AAEL000079	supercont1.1	+	321779	392211	9296	205	901	355	401	559	344	732	429	1029	1.11172	5.07494	2.08932	2.72447	2.6988	1.63705	4.02122	2.35259	5.27441	2.75866	2.35344	3.88274	406.657	477.984	-0.23315	0.57246	1	FALSE	435.923	678.011	-0.63724	0.014584	0.15326	FALSE	647.17	484.608	0.41733	0.43574	1	FALSE	--	--	--	--	GO:0003674//GO:0005488//GO:0005515
AAEL000080	supercont1.1	+	4413646	4416304	2354	40455	25288	33357	9915	17687	16101	45169	32848	39502	866.373	562.484	775.272	266.023	337.212	302.583	979.889	711.356	799.59	734.71	301.94	830.278	13528.3	35673.1	-1.3989	0.0026288	0.060821	FALSE	14493.2	37919.2	-1.3875	9.3527e-08	6.4764e-06	DOWN	36188	36306.2	-0.0047078	0.8828	1	FALSE	GO:0008150//GO:0044723//GO:0019318//GO:0044238//GO:0044699//GO:0008152//GO:0019319//GO:0071704//GO:0046364//GO:0006094//GO:0044711//GO:0044281//GO:0016051//GO:0005975//GO:0009058//GO:0044710//GO:0006006//GO:1901576//GO:0044283//GO:0005996	biological_process//single-organism carbohydrate metabolic process//hexose metabolic process//primary metabolic process//single-organism process//metabolic process//hexose biosynthetic process//organic substance metabolic process//monosaccharide biosynthetic process//gluconeogenesis//single-organism biosynthetic process//small molecule metabolic process//carbohydrate biosynthetic process//carbohy…	--	--	GO:0000166//GO:0043168//GO:0043167//GO:0016830//GO:0001883//GO:0032555//GO:1901363//GO:1901265//GO:0016831//GO:0035639//GO:0032553//GO:0016829//GO:0097367//GO:0019001//GO:0003674//GO:0032549//GO:0005525//GO:0001882//GO:0003824//GO:0097159//GO:0032550//GO:0017076//GO:0036094//GO:0005488//GO:0004611//GO:0032561
AAEL000081	supercont1.1	-	531068	537308	3365	860	1187	532	739	958	700	948	599	1310	12.8841	18.47	8.64968	13.8705	12.7772	9.20263	14.3869	9.07457	18.5499	13.3346	11.9501	14.0038	750.895	868.29	-0.20957	0.3631	1	FALSE	804.841	888.835	-0.14321	0.50196	0.94922	FALSE	848.386	881.263	-0.054851	0.83985	1	FALSE	GO:1901293//GO:0090304//GO:0009126//GO:1901576//GO:0006396//GO:0034641//GO:0019222//GO:0006259//GO:0097659//GO:0044419//GO:0006793//GO:0019438//GO:0044763//GO:0009451//GO:0034660//GO:0019079//GO:0050794//GO:0034470//GO:0009889//GO:0034654//GO:0034645//GO:0044764//GO:0051171//GO:0050789//GO:0008033//GO:1901659//GO:0071704//GO:0072522//GO:0031326//GO:0009165//GO:0006163//GO:0019637//GO:0060255//GO:…	nucleoside phosphate biosynthetic process//nucleic acid metabolic process//purine nucleoside monophosphate metabolic process//organic substance biosynthetic process//RNA processing//cellular nitrogen compound metabolic process//regulation of metabolic process//DNA metabolic process//nucleic acid-templated transcription//interspecies interaction between organisms//phosphorus metabolic process//aro…	GO:0005623//GO:0043227//GO:0033178//GO:0005740//GO:0043231//GO:0043226//GO:0032991//GO:0031966//GO:0005575//GO:0005622//GO:0005737//GO:0044446//GO:0098798//GO:0005743//GO:0044455//GO:0016469//GO:0098800//GO:0044424//GO:0044464//GO:0019866//GO:0005753//GO:0016020//GO:0044429//GO:0044422//GO:0031090//GO:0005739//GO:0031967//GO:0044425//GO:0031975//GO:0043234//GO:0045261//GO:0044444//GO:0000275//GO:…	cell//membrane-bounded organelle//proton-transporting two-sector ATPase complex, catalytic domain//mitochondrial envelope//intracellular membrane-bounded organelle//organelle//macromolecular complex//mitochondrial membrane//cellular_component//intracellular//cytoplasm//intracellular organelle part//mitochondrial protein complex//mitochondrial inner membrane//mitochondrial membrane part//proton-tr…	GO:0008134//GO:1901265//GO:0017076//GO:0016787//GO:0036094//GO:0035639//GO:0016817//GO:0016772//GO:0008173//GO:0032553//GO:0016818//GO:0043531//GO:0008175//GO:0008200//GO:0005488//GO:0009378//GO:0016248//GO:0005524//GO:0097367//GO:0016740//GO:0005515//GO:0003674//GO:0003678//GO:0003723//GO:0016887//GO:0030554//GO:0008168//GO:0017111//GO:0019870//GO:0000166//GO:0043168//GO:0032549//GO:0043167//GO:…
AAEL000082	supercont1.1	+	2334445	2348734	1389	3	1	0	0	0	0	1	0	2	0.108883	0.0376964	0	0	0	0	0.0367655	0	0.0686092	0.0488597	0	0.0351249	0	1.35979	#NAME?	0.58984	1	FALSE	0	0.857817	#NAME?	0.69709	1	FALSE	0.819098	1.38008	-0.75264	0.93965	1	FALSE	GO:0050912//GO:0050906//GO:0050907//GO:0044707//GO:0050909//GO:0032501//GO:0008150//GO:0007606//GO:0009593//GO:0042221//GO:0050896//GO:0003008//GO:0050877//GO:0044699//GO:0007600//GO:0051606	detection of chemical stimulus involved in sensory perception of taste//detection of stimulus involved in sensory perception//detection of chemical stimulus involved in sensory perception//single-multicellular organism process//sensory perception of taste//multicellular organismal process//biological_process//sensory perception of chemical stimulus//detection of chemical stimulus//response to che…	GO:0016021//GO:0005575//GO:0031224//GO:0016020//GO:0044425	integral component of membrane//cellular_component//intrinsic component of membrane//membrane//membrane part	GO:0038023//GO:0004871//GO:0008527//GO:0004930//GO:0004872//GO:0003674//GO:0060089//GO:0004888
AAEL000083	supercont1.1	+	5068803	5073848	1017	0	13	0	0	2	2	0	0	1	0	0.669306	0	0	0.0882602	0.0869977	0	0	0.0468526	0.223102	0.0584193	0.0156175	1.18139	3.68759	-1.6422	0.52659	1	FALSE	1.2643	0.266012	2.2488	0.71792	1	FALSE	0.254089	3.71355	-3.8694	0.36272	1	FALSE	--	--	--	--	--
AAEL000084	supercont1.1	-	248250	271915	1678	1325	1240	858	881	1202	1185	1213	1096	1292	39.8074	38.6929	27.9749	33.1602	32.1491	31.241	36.9158	33.2968	36.6881	35.4917	32.1834	35.6336	1023.29	1186.83	-0.2139	0.43784	1	FALSE	1096.4	1162.47	-0.084411	0.80137	1	FALSE	1109.39	1206.03	-0.1205	0.66071	1	FALSE	GO:0008150//GO:0010556//GO:0009987//GO:0019219//GO:0046483//GO:0033554//GO:0065007//GO:0006139//GO:0006807//GO:0006351//GO:0010467//GO:0032774//GO:0006725//GO:0044699//GO:0051252//GO:0044238//GO:0006281//GO:2000112//GO:0043170//GO:0006974//GO:0044710//GO:0009058//GO:0050896//GO:0010468//GO:1901360//GO:1903506//GO:0044249//GO:0006950//GO:0009059//GO:0006355//GO:0008152//GO:0009889//GO:0050794//GO:…	biological_process//regulation of macromolecule biosynthetic process//cellular process//regulation of nucleobase-containing compound metabolic process//heterocycle metabolic process//cellular response to stress//biological regulation//nucleobase-containing compound metabolic process//nitrogen compound metabolic process//transcription, DNA-templated//gene expression//RNA biosynthetic process//cell…	--	--	GO:0008168//GO:0016741//GO:0043167//GO:0046872//GO:0043169//GO:0003824//GO:0003677//GO:0097159//GO:0003676//GO:1901363//GO:0005515//GO:0016740//GO:0046914//GO:0005488//GO:0008270//GO:0003674
AAEL000085	supercont1.1	-	2999015	3006362	1211	0	0	0	0	0	0	0	0	0	0	0	0	0	0	0	0	0	0	0	0	0	0	0	NA	NA	NA	NA	0	0	NA	NA	NA	NA	0	0	NA	NA	NA	NA	--	--	--	--	--
AAEL000086	supercont1.1	-	2206160	2207580	1041	1	5	1	0	1	0	0	0	3	0.0484271	0.25149	0.0525561	0	0.0431127	0	0	0	0.137317	0.117491	0.0143709	0.0457724	0.271614	2.19637	-3.0155	0.50343	1	FALSE	0.291333	0.798036	-1.4538	0.88144	1	FALSE	0.762268	2.22252	-1.5438	0.63942	1	FALSE	GO:0006508//GO:0019538//GO:0043170//GO:0044238//GO:0008152//GO:0008150//GO:0071704	proteolysis//protein metabolic process//macromolecule metabolic process//primary metabolic process//metabolic process//biological_process//organic substance metabolic process	--	--	GO:0008236//GO:0003824//GO:0004252//GO:0070011//GO:0016787//GO:0017171//GO:0003674//GO:0004175//GO:0008233
AAEL000087	supercont1.1	-	1944984	2007195	4631	85	124	49	71	565	209	129	61	83	0.925302	1.402	0.578889	0.968315	5.47557	1.9965	1.42252	0.67149	0.854	0.968731	2.81346	0.982669	245.834	86.2125	1.5117	0.13912	0.83408	FALSE	263.424	87.6822	1.587	0.11432	0.53064	FALSE	83.6812	87.4719	-0.063916	0.76553	1	FALSE	GO:0051704//GO:0044260//GO:0006323//GO:0019058//GO:0019073//GO:0034641//GO:0090304//GO:0044419//GO:0006259//GO:0019072//GO:0044764//GO:0006725//GO:1901360//GO:1902590//GO:0019068//GO:0071103//GO:0006996//GO:0009987//GO:0046483//GO:0006807//GO:0016032//GO:0071840//GO:0051276//GO:0044237//GO:0044403//GO:0022607//GO:0044033//GO:0071704//GO:0043170//GO:0044238//GO:0008152//GO:0008150//GO:0006139//GO:…	multi-organism process//cellular macromolecule metabolic process//DNA packaging//viral life cycle//viral DNA genome packaging//cellular nitrogen compound metabolic process//nucleic acid metabolic process//interspecies interaction between organisms//DNA metabolic process//viral genome packaging//multi-organism cellular process//cellular aromatic compound metabolic process//organic cyclic compound …	GO:0005576//GO:0005575//GO:0044421//GO:0005615	extracellular region//cellular_component//extracellular region part//extracellular space	GO:0030414//GO:0061134//GO:0003674//GO:0030234//GO:0004866//GO:0098772//GO:0004857//GO:0061135
AAEL000088	supercont1.1	+	5339302	5361039	3079	215	223	143	180	327	225	227	191	253	3.52021	3.79225	2.54097	3.69229	4.76644	3.23275	3.76495	3.16234	3.9153	3.28448	3.89716	3.6142	225.726	200.346	0.17208	0.55521	1	FALSE	241.897	215.076	0.16955	0.50765	0.95132	FALSE	205.261	203.543	0.012132	0.99272	1	FALSE	GO:0044765//GO:0051641//GO:1902582//GO:0051649//GO:0044699//GO:0051179//GO:1902578//GO:0051234//GO:0046907//GO:0008150//GO:0006810//GO:0048193//GO:0016192	single-organism transport//cellular localization//single-organism intracellular transport//establishment of localization in cell//single-organism process//localization//single-organism localization//establishment of localization//intracellular transport//biological_process//transport//Golgi vesicle transport//vesicle-mediated transport	GO:0005575//GO:0016020	cellular_component//membrane	GO:0005488//GO:0003674//GO:0003676//GO:1901363//GO:0097159
AAEL000089	supercont1.1	-	3954060	3961968	1788	0	0	0	0	0	0	0	0	0	0	0	0	0	0	0	0	0	0	0	0	0	0	0	NA	NA	NA	NA	0	0	NA	NA	NA	NA	0	0	NA	NA	NA	NA	--	--	GO:0005575//GO:0016020	cellular_component//membrane	GO:0022857//GO:0008066//GO:0060089//GO:0015075//GO:0003674//GO:0004888//GO:0005230//GO:0022892//GO:0005215//GO:0022891//GO:0038023//GO:0004871//GO:0004872//GO:0004970//GO:0022836//GO:0015276//GO:0022803//GO:0022838//GO:0015267//GO:0022834//GO:0005216
AAEL000090	supercont1.1	+	4262499	4284409	2871	3625	3146	2866	2873	3859	4200	3179	3389	3429	63.6523	57.3756	54.6156	63.2027	60.325	64.7165	56.5458	60.1759	56.91	58.5479	62.7481	57.8773	3427.6	3394.58	0.013967	0.86389	1	FALSE	3672.12	3257.67	0.17278	0.42213	0.90008	FALSE	3108.79	3451.83	-0.15101	0.60846	1	FALSE	GO:0051234//GO:0008150//GO:0009628//GO:0006810//GO:0008104//GO:0009416//GO:0050896//GO:0051179//GO:0015031//GO:0071702//GO:0009314//GO:0045184//GO:0033036	establishment of localization//biological_process//response to abiotic stimulus//transport//protein localization//response to light stimulus//response to stimulus//localization//protein transport//organic substance transport//response to radiation//establishment of protein localization//macromolecule localization	GO:0016020//GO:0044425//GO:0005576//GO:0016021//GO:0031224//GO:0005575	membrane//membrane part//extracellular region//integral component of membrane//intrinsic component of membrane//cellular_component	GO:0005179//GO:0005488//GO:0005515//GO:0003674//GO:0005102
AAEL000091	supercont1.1	-	2722209	2724385	1637	151	253	114	176	303	148	244	133	340	4.65016	8.09234	3.81004	6.79043	8.3071	3.99956	7.61174	4.14178	9.89657	5.51751	6.3657	7.2167	193.191	173.737	0.15312	0.69437	1	FALSE	207.108	221.341	-0.095889	0.72509	1	FALSE	211.275	176.311	0.261	0.4436	1	FALSE	GO:0009144//GO:0044710//GO:0009058//GO:1901360//GO:0044249//GO:0006725//GO:0009150//GO:0046128//GO:0009161//GO:0019693//GO:0009116//GO:0009119//GO:0009141//GO:0072521//GO:0055086//GO:0055114//GO:1901564//GO:0046034//GO:0044281//GO:0006778//GO:0009987//GO:0009259//GO:0046483//GO:0006753//GO:0006807//GO:1901657//GO:0006796//GO:0044271//GO:1901362//GO:0022900//GO:0019637//GO:0042775//GO:0019438//GO:…	purine nucleoside triphosphate metabolic process//single-organism metabolic process//biosynthetic process//organic cyclic compound metabolic process//cellular biosynthetic process//cellular aromatic compound metabolic process//purine ribonucleotide metabolic process//purine ribonucleoside metabolic process//ribonucleoside monophosphate metabolic process//ribose phosphate metabolic process//nucleo…	GO:0043234//GO:0031090//GO:0044422//GO:0044429//GO:0016020//GO:0019866//GO:1902494//GO:0044464//GO:0044424//GO:0098800//GO:1990351//GO:1990204//GO:0005746//GO:0098798//GO:0044446//GO:0005737//GO:0031224//GO:0031966//GO:0043226//GO:0005740//GO:0016021//GO:0045275//GO:0005623//GO:0043229//GO:0098796//GO:0044444//GO:0031967//GO:0005750//GO:0044425//GO:0031975//GO:0005739//GO:1902495//GO:0044455//GO:…	protein complex//organelle membrane//organelle part//mitochondrial part//membrane//organelle inner membrane//catalytic complex//cell part//intracellular part//inner mitochondrial membrane protein complex//transporter complex//oxidoreductase complex//mitochondrial respiratory chain//mitochondrial protein complex//intracellular organelle part//cytoplasm//intrinsic component of membrane//mitochondri…	GO:0016877//GO:0043115//GO:0003824//GO:0016627//GO:0016491//GO:0008641//GO:0016628//GO:0003674//GO:0016874
AAEL000092	supercont1.1	+	2360773	2361556	657	1674	1463	1388	1108	1328	1653	1347	960	1226	128.449	116.595	115.584	106.514	90.7169	111.303	104.7	74.4887	88.9159	120.209	102.845	89.3681	1288.96	1597.54	-0.30964	0.27834	1	FALSE	1380.83	1136	0.28156	0.27174	0.7756	FALSE	1084.16	1624.64	-0.58355	0.055255	0.63539	FALSE	--	--	--	--	GO:0005515//GO:0005488//GO:0003674
AAEL000093	supercont1.1	+	1037310	1100565	3853	407	596	336	422	585	472	453	347	500	5.32519	8.09933	4.77105	6.91746	6.81416	5.41928	6.00402	4.59108	6.18337	6.06519	6.38363	5.59282	462.158	455.959	0.019484	0.99427	1	FALSE	495.283	414.703	0.25618	0.34591	0.8458	FALSE	395.787	463.015	-0.22633	0.42395	1	FALSE	GO:0050896//GO:0008152//GO:0051336//GO:0044699//GO:0023052//GO:0050790//GO:0065009//GO:0009987//GO:0008150//GO:0065007//GO:0007154//GO:0051716//GO:0044700//GO:0007165//GO:0050789//GO:0043087//GO:0050794//GO:0035556//GO:0019222//GO:0044763	response to stimulus//metabolic process//regulation of hydrolase activity//single-organism process//signaling//regulation of catalytic activity//regulation of molecular function//cellular process//biological_process//biological regulation//cell communication//cellular response to stimulus//single organism signaling//signal transduction//regulation of biological process//regulation of GTPase activ…	GO:0005634//GO:0043229//GO:0044422//GO:0044464//GO:0044428//GO:0044424//GO:0044446//GO:0043233//GO:0005622//GO:0031974//GO:0043228//GO:0005575//GO:0031981//GO:0043231//GO:0043226//GO:0043227//GO:0043232//GO:0005694//GO:0000228//GO:0005623//GO:0070013	nucleus//intracellular organelle//organelle part//cell part//nuclear part//intracellular part//intracellular organelle part//organelle lumen//intracellular//membrane-enclosed lumen//non-membrane-bounded organelle//cellular_component//nuclear lumen//intracellular membrane-bounded organelle//organelle//membrane-bounded organelle//intracellular non-membrane-bounded organelle//chromosome//nuclear chr…	GO:0003674//GO:0005515//GO:0005488
AAEL000094	supercont1.1	-	3143035	3145074	1575	14	20	21	3	9	6	1	2	4	0.448112	0.664893	0.729478	0.120302	0.256459	0.168527	0.0324237	0.0647342	0.121014	0.614161	0.181763	0.0727238	5.44426	19.5016	-1.8408	0.068847	0.58396	FALSE	5.83269	2.16282	1.4312	0.3423	0.84279	FALSE	2.06443	19.8383	-3.2645	0.0013426	0.056682	FALSE	--	--	--	--	--
AAEL000095	supercont1.1	+	3746418	3763059	1183	0	0	0	0	0	0	0	0	0	0	0	0	0	0	0	0	0	0	0	0	0	0	0	NA	NA	NA	NA	0	0	NA	NA	NA	NA	0	0	NA	NA	NA	NA	--	--	GO:0016020//GO:0005575	membrane//cellular_component	GO:0004888//GO:0022891//GO:0005215//GO:0022892//GO:0005230//GO:0005216//GO:0022834//GO:0015267//GO:0022857//GO:0004970//GO:0004872//GO:0004871//GO:0038023//GO:0022838//GO:0003674//GO:0060089//GO:0015075//GO:0022803//GO:0005231//GO:0008066//GO:0005234//GO:0015276//GO:0022836
AAEL000096	supercont1.1	+	453025	453507	405	1	1	6	1	2	2	0	4	0	0.124476	0.129285	0.810531	0.155947	0.221631	0.218461	0	0.503488	0	0.354764	0.19868	0.167829	1.54314	3.15849	-1.0334	0.78941	1	FALSE	1.6529	1.54596	0.096494	0.97656	1	FALSE	1.47431	3.227	-1.1302	0.62616	1	FALSE	--	--	GO:0016020//GO:0005575	membrane//cellular_component	GO:0004888//GO:0003674//GO:0060089//GO:0004871//GO:0038023//GO:0004930//GO:0004872
AAEL000097	supercont1.1	+	2728526	2733822	1191	0	1	0	1	0	0	2	0	0	0	0.0439633	0	0.05303	0	0	0.0857553	0	0	0.0146544	0.0176767	0.0285851	0.361747	0.283661	0.35081	1	1	FALSE	0.388595	0.651587	-0.74569	1	1	FALSE	0.621838	0.285658	1.1223	1	1	FALSE	GO:0071704//GO:0044711//GO:0044723//GO:0008150//GO:0008152//GO:0044238//GO:0044699//GO:1901576//GO:0044710//GO:0009058//GO:0016051//GO:0005975	organic substance metabolic process//single-organism biosynthetic process//single-organism carbohydrate metabolic process//biological_process//metabolic process//primary metabolic process//single-organism process//organic substance biosynthetic process//single-organism metabolic process//biosynthetic process//carbohydrate biosynthetic process//carbohydrate metabolic process	--	--	--
AAEL000098	supercont1.1	-	3291051	3309375	1367	0	0	2	0	0	4	0	0	1	0	0	0.0800452	0	0	0.129446	0	0	0.0348567	0.0266817	0.0431488	0.0116189	1.27633	0.838707	0.60576	0.92573	1	FALSE	1.36328	0.266012	2.3575	0.70946	1	FALSE	0.254089	0.858846	-1.7571	0.96541	1	FALSE	--	--	--	--	--
AAEL000099	supercont1.1	-	2031211	2035040	1083	145	135	76	79	380	123	211	128	118	6.74961	6.52691	3.83936	4.60714	15.7475	5.0243	9.9494	6.02512	5.19168	5.70529	8.45964	7.0554	171.038	122.178	0.48534	0.44297	1	FALSE	183.326	149.603	0.29328	0.56122	0.97858	FALSE	142.764	124.097	0.20217	0.69221	1	FALSE	GO:0044699//GO:0044238//GO:0043170//GO:0008152//GO:0008150//GO:0009987//GO:0051704//GO:0006508//GO:0009405//GO:0016265//GO:0019538//GO:0044763//GO:0071704//GO:0008219	single-organism process//primary metabolic process//macromolecule metabolic process//metabolic process//biological_process//cellular process//multi-organism process//proteolysis//pathogenesis//death//protein metabolic process//single-organism cellular process//organic substance metabolic process//cell death	GO:0005576//GO:0005575	extracellular region//cellular_component	GO:0017171//GO:0003824//GO:0008236//GO:0004252//GO:0003674//GO:0070011//GO:0008233//GO:0016787//GO:0004175
AAEL000100	supercont1.1	+	1130757	1151525	168	2	3	2	7	4	7	5	2	1	0.60015	0.935005	0.65132	2.63161	1.06858	1.84326	1.51986	0.606883	0.283625	0.728825	1.84782	0.803456	5.85226	2.40711	1.2817	0.50143	1	FALSE	6.27123	2.66796	1.233	0.38936	0.87615	FALSE	2.54584	2.44543	0.058051	1	1	FALSE	--	--	--	--	--
AAEL000101	supercont1.2	-	4856724	4859457	2616	3870	2956	3135	1867	3107	3214	2958	3340	2837	74.5783	59.1655	65.5652	45.0754	53.3039	54.3509	57.7435	65.0868	51.6745	66.4364	50.9101	58.1683	2544.82	3541.38	-0.47675	0.14493	0.84896	FALSE	2726.07	3009.25	-0.14258	0.77079	1	FALSE	2871.6	3602.45	-0.32712	0.31083	1	FALSE	GO:0008152//GO:0008150	metabolic process//biological_process	GO:0044425//GO:0016020//GO:0031224//GO:0005575//GO:0016021	membrane part//membrane//intrinsic component of membrane//cellular_component//integral component of membrane	GO:0003824//GO:0003674
AAEL000102	supercont1.2	+	2438410	2465504	1219	675	550	534	400	617	553	663	785	747	28.0763	23.7609	24.1053	20.8444	22.8475	20.1847	27.9353	33.0181	29.3679	25.3142	21.2922	30.1071	488.737	622.076	-0.34803	0.28177	1	FALSE	523.663	718.107	-0.45556	0.12854	0.55766	FALSE	685.277	632.668	0.11524	0.68566	1	FALSE	--	--	--	--	--
AAEL000103	supercont1.2	-	821661	842014	795	38	57	31	48	61	83	53	69	70	2.40966	3.75413	2.13338	3.81335	3.44365	4.61859	3.40449	4.42452	4.19552	2.76572	3.95853	4.00818	60.4162	42.7995	0.49734	0.34882	1	FALSE	64.7118	62.5557	0.048887	0.86987	1	FALSE	59.6968	43.4573	0.45806	0.38859	1	FALSE	--	--	--	--	GO:0005488//GO:0005515//GO:0003674
AAEL000104	supercont1.2	+	618534	625601	1779	1	5	0	1	3	0	0	1	2	0.0283376	0.147162	0	0.0355023	0.0756835	0	0	0.0286555	0.0535684	0.0584999	0.0370619	0.027408	1.17659	1.77701	-0.59484	0.87429	1	FALSE	1.26259	0.918514	0.45902	0.97907	1	FALSE	0.876756	1.7931	-1.0322	0.72916	1	FALSE	--	--	--	--	GO:0003674//GO:0003824//GO:0016787
AAEL000105	supercont1.2	+	2491985	2493159	1175	89	160	83	65	228	81	260	97	211	3.81849	7.12991	3.86468	3.49388	8.70869	3.04962	11.3	4.20841	8.55656	4.93769	5.08406	8.02166	111.287	112.117	-0.010719	0.96334	1	FALSE	119.289	178.324	-0.58004	0.358	0.85612	FALSE	170.204	113.815	0.58057	0.18599	1	FALSE	GO:0008152//GO:0006807//GO:0008150	metabolic process//nitrogen compound metabolic process//biological_process	--	--	GO:0003674//GO:0016810//GO:0016787//GO:0003824
AAEL000106	supercont1.2	+	5008949	5019316	1312	60	109	71	87	94	108	114	75	129	2.30546	4.35005	2.96073	4.18811	3.21551	3.64157	4.43725	2.91415	4.68501	3.20541	3.68173	4.01214	91.4646	82.2156	0.1538	0.76254	1	FALSE	98.0015	100.443	-0.035499	0.86932	1	FALSE	95.8656	83.5141	0.19899	0.61685	1	FALSE	--	--	--	--	--
AAEL000107	supercont1.2	-	5608988	5614232	2515	53	84	48	39	91	62	57	42	92	1.06237	1.74881	1.04418	0.979399	1.6239	1.09057	1.15739	0.851326	1.74303	1.28512	1.23129	1.25058	58.6081	62.968	-0.10352	0.86061	1	FALSE	62.7972	59.2759	0.083255	0.85096	1	FALSE	56.5789	63.9423	-0.17651	0.7265	1	FALSE	--	--	GO:0044424//GO:0044464//GO:0043229//GO:0005634//GO:0005623//GO:0043227//GO:0043226//GO:0043231//GO:0005575//GO:0005622	intracellular part//cell part//intracellular organelle//nucleus//cell//membrane-bounded organelle//organelle//intracellular membrane-bounded organelle//cellular_component//intracellular	GO:0046872//GO:0043167//GO:0003677//GO:0043169//GO:1901363//GO:0003676//GO:0097159//GO:0008270//GO:0005488//GO:0046914//GO:0003674
AAEL000108	supercont1.2	+	5076181	5077955	1716	3	2	0	1	2	1	3	1	0	0.088134	0.061026	0	0.0368058	0.052308	0.0257799	0.0892785	0.0297076	0	0.04972	0.0382979	0.039662	1.22406	1.64345	-0.42505	0.95802	1	FALSE	1.31208	1.36387	-0.055852	1	1	FALSE	1.30133	1.66574	-0.35617	0.93105	1	FALSE	GO:0071704//GO:0019538//GO:0006508//GO:0008150//GO:0008152//GO:0044238//GO:0043170	organic substance metabolic process//protein metabolic process//proteolysis//biological_process//metabolic process//primary metabolic process//macromolecule metabolic process	GO:0005623//GO:0005622//GO:0005575//GO:0044464	cell//intracellular//cellular_component//cell part	GO:0008233//GO:0016787//GO:0004177//GO:0003674//GO:0070011//GO:0008238//GO:0003824
AAEL000109	supercont1.2	+	5121975	5164107	5002	1440	3826	1110	2008	2554	1317	2503	1362	4085	14.513	40.0501	12.141	25.3544	22.9157	11.6477	25.5541	13.8809	38.9137	22.2347	19.9726	26.1162	1840.32	2067.31	-0.1678	0.60142	1	FALSE	1973.22	2428.52	-0.29953	0.3518	0.85106	FALSE	2318.19	2094.91	0.14611	0.83565	1	FALSE	--	--	--	--	--
AAEL000111	supercont1.2	-	2474693	2476117	1355	28	94	28	24	115	32	105	20	73	1.04174	3.63237	1.13056	1.11868	3.80903	1.04474	3.95725	0.752446	2.56707	1.93489	1.99082	2.42559	50.1282	48.4498	0.049129	0.96878	1	FALSE	53.7358	61.357	-0.19135	0.88208	1	FALSE	58.5666	49.0903	0.25464	0.80939	1	FALSE	GO:0008152//GO:0008150//GO:0006807	metabolic process//biological_process//nitrogen compound metabolic process	--	--	GO:0003674//GO:0016810//GO:0016787//GO:0003824
AAEL000112	supercont1.2	-	154036	154836	743	0	0	0	0	0	0	0	0	0	0	0	0	0	0	0	0	0	0	0	0	0	0	0	NA	NA	NA	NA	0	0	NA	NA	NA	NA	0	0	NA	NA	NA	NA	--	--	--	--	--
AAEL000113	supercont1.2	+	2340203	2341197	927	0	0	0	0	0	0	0	0	0	0	0	0	0	0	0	0	0	0	0	0	0	0	0	NA	NA	NA	NA	0	0	NA	NA	NA	NA	0	0	NA	NA	NA	NA	--	--	--	--	GO:0003674//GO:0005488//GO:0005515
AAEL000114	supercont1.2	+	1427360	1428526	1167	0	0	0	0	0	0	0	0	0	0	0	0	0	0	0	0	0	0	0	0	0	0	0	NA	NA	NA	NA	0	0	NA	NA	NA	NA	0	0	NA	NA	NA	NA	--	--	GO:0019013//GO:0044423//GO:0019012//GO:0005575//GO:0019028	viral nucleocapsid//virion part//virion//cellular_component//viral capsid	--
AAEL000115	supercont1.2	-	5023909	5024868	880	19	87	37	41	68	38	57	40	112	1.11118	5.28462	2.34838	3.00407	3.54044	1.95018	3.37684	2.36558	6.19106	2.91473	2.83156	3.97783	45.4265	47.01	-0.049434	0.85745	1	FALSE	48.6941	63.8232	-0.39033	0.31454	0.8165	FALSE	60.9235	47.6722	0.35385	0.54445	1	FALSE	--	--	--	--	GO:0003676//GO:1901363//GO:0097159//GO:0005488//GO:0003674
AAEL000116	supercont1.2	-	5102099	5104958	2798	41	80	32	75	71	45	61	47	97	0.738713	1.49708	0.625714	1.69296	1.13885	0.711482	1.11333	0.856317	1.65188	0.953835	1.1811	1.20718	60.7743	50.8192	0.25809	0.71827	1	FALSE	65.1661	63.8416	0.029624	0.96066	1	FALSE	60.9359	51.5512	0.24128	0.64453	1	FALSE	--	--	--	--	--
AAEL000117	supercont1.2	+	132625	133230	606	1	0	0	0	0	0	0	0	0	0.0831892	0	0	0	0	0	0	0	0	0.0277297	0	0	0	0.358708	#NAME?	0.98735	1	FALSE	0	0	NA	NA	NA	NA	0	0.364807	#NAME?	0.98345	1	FALSE	--	--	--	--	--
AAEL000118	supercont1.2	+	5094650	5100819	4441	117	240	131	170	228	142	225	157	289	1.32814	2.82965	1.61385	2.41769	2.30414	1.41451	2.58729	1.8022	3.10078	1.92388	2.04545	2.49676	168.735	164.983	0.032441	0.99426	1	FALSE	180.881	210.86	-0.22124	0.44386	0.91465	FALSE	201.255	167.495	0.26491	0.46011	1	FALSE	GO:2000112//GO:0043170//GO:0044238//GO:0006725//GO:0051252//GO:0009059//GO:0008152//GO:0006355//GO:0044249//GO:1903506//GO:0009058//GO:1901360//GO:0010468//GO:0006139//GO:0006807//GO:0065007//GO:0009987//GO:0019219//GO:0046483//GO:0008150//GO:0010556//GO:0032774//GO:0010467//GO:0006351//GO:0044260//GO:1901362//GO:0044237//GO:0016070//GO:0080090//GO:2001141//GO:0044271//GO:0018130//GO:1901576//GO:…	regulation of cellular macromolecule biosynthetic process//macromolecule metabolic process//primary metabolic process//cellular aromatic compound metabolic process//regulation of RNA metabolic process//macromolecule biosynthetic process//metabolic process//regulation of transcription, DNA-templated//cellular biosynthetic process//regulation of nucleic acid-templated transcription//biosynthetic pr…	--	--	--
AAEL000119	supercont1.2	-	4969755	4972499	2552	259	221	251	129	191	137	213	165	252	5.11633	4.53434	5.38105	3.19258	3.35899	2.37486	4.26228	3.296	4.70516	5.01057	2.97548	4.08781	142.258	260.852	-0.87472	0.013554	0.209	FALSE	152.465	200.2	-0.39296	0.21948	0.71404	FALSE	191.072	265.401	-0.47406	0.21156	1	FALSE	GO:0008152//GO:0008150	metabolic process//biological_process	--	--	GO:0003824//GO:0003674
AAEL000120	supercont1.2	-	785708	786727	1020	0	0	0	0	0	0	0	0	0	0	0	0	0	0	0	0	0	0	0	0	0	0	0	NA	NA	NA	NA	0	0	NA	NA	NA	NA	0	0	NA	NA	NA	NA	--	--	GO:0019013//GO:0005575//GO:0019012//GO:0044423//GO:0019028	viral nucleocapsid//cellular_component//virion//virion part//viral capsid	--
AAEL000121	supercont1.2	-	42025	122348	4204	12	12	18	6	7	11	7	18	20	0.143899	0.149459	0.234252	0.0901408	0.0747293	0.115752	0.0850312	0.21827	0.226684	0.17587	0.0935407	0.176662	7.58169	15.2568	-1.0089	0.345	1	FALSE	8.1199	14.5576	-0.84224	0.33078	0.83113	FALSE	13.8926	15.5352	-0.16122	0.93026	1	FALSE	--	--	--	--	--
AAEL000122	supercont1.2	+	5689935	5699102	1756	44	75	40	54	51	43	47	33	56	1.26319	2.23635	1.24626	1.94224	1.30347	1.08329	1.36684	0.958019	1.51956	1.58193	1.443	1.28147	47.1072	53.8319	-0.19251	0.63405	1	FALSE	50.4973	42.9631	0.23311	0.67729	1	FALSE	41.0052	54.6528	-0.41449	0.36988	1	FALSE	--	--	GO:0005575//GO:0005622//GO:0043231//GO:0043227//GO:0043229//GO:0005634//GO:0005623//GO:0043226//GO:0044424//GO:0044464	cellular_component//intracellular//intracellular membrane-bounded organelle//membrane-bounded organelle//intracellular organelle//nucleus//cell//organelle//intracellular part//cell part	GO:0003674//GO:0043167//GO:0046914//GO:0008270//GO:0005488//GO:0043169//GO:0046872
AAEL000123	supercont1.2	-	1329955	1344747	884	0	4	0	1	8	0	0	2	1	0	0.236924	0	0.0714465	0.406157	0	0	0.115335	0.0539017	0.0789748	0.159201	0.0564123	2.53466	1.13464	1.1596	0.76356	1	FALSE	2.71926	1.03899	1.388	0.51064	0.95249	FALSE	0.991244	1.14263	-0.20505	0.93919	1	FALSE	GO:0044403//GO:0016070//GO:0051704//GO:0044237//GO:0044260//GO:1901362//GO:0019080//GO:0018130//GO:0044271//GO:0044033//GO:0019058//GO:0019438//GO:0044419//GO:0034641//GO:1901576//GO:0090304//GO:0071704//GO:0044764//GO:0034654//GO:0006725//GO:0044238//GO:0043170//GO:0009058//GO:1901360//GO:0044249//GO:0009059//GO:0008152//GO:0008150//GO:0019083//GO:0009987//GO:0046483//GO:0016032//GO:0006139//GO:…	symbiosis, encompassing mutualism through parasitism//RNA metabolic process//multi-organism process//cellular metabolic process//cellular macromolecule metabolic process//organic cyclic compound biosynthetic process//viral gene expression//heterocycle biosynthetic process//cellular nitrogen compound biosynthetic process//multi-organism metabolic process//viral life cycle//aromatic compound biosyn…	--	--	GO:0005515//GO:0016740//GO:0005488//GO:0016779//GO:0003674//GO:0016772//GO:0003824//GO:0003677//GO:0003899//GO:0097159//GO:0003676//GO:1901363//GO:0034062
AAEL000124	supercont1.2	+	673060	674073	638	6	1	15	27	5	77	4	3	21	0.4741	0.0820694	1.28631	2.67286	0.351726	5.33911	0.320171	0.239709	1.56839	0.614158	2.7879	0.709422	35.6946	8.72621	2.0323	0.16281	0.89201	FALSE	38.1918	8.0489	2.2464	0.19279	0.67915	FALSE	7.68528	8.91585	-0.21427	0.94351	1	FALSE	--	--	--	--	--
AAEL000125	supercont1.2	+	5600026	5600859	779	0	0	0	0	0	0	0	0	0	0	0	0	0	0	0	0	0	0	0	0	0	0	0	NA	NA	NA	NA	0	0	NA	NA	NA	NA	0	0	NA	NA	NA	NA	GO:0016070//GO:0044260//GO:0008033//GO:0006464//GO:0019538//GO:0034470//GO:0034641//GO:0090304//GO:1901360//GO:0036211//GO:0006399//GO:0006725//GO:0044267//GO:0009987//GO:0046483//GO:0006807//GO:0043412//GO:0044237//GO:0071704//GO:0034660//GO:0006396//GO:0008152//GO:0043170//GO:0044238//GO:0010467//GO:0008150//GO:0006139	RNA metabolic process//cellular macromolecule metabolic process//tRNA processing//cellular protein modification process//protein metabolic process//ncRNA processing//cellular nitrogen compound metabolic process//nucleic acid metabolic process//organic cyclic compound metabolic process//protein modification process//tRNA metabolic process//cellular aromatic compound metabolic process//cellular pro…	GO:0043226//GO:0005623//GO:0044464//GO:0044424//GO:0005622//GO:0005575//GO:0043231//GO:0043227//GO:0005634//GO:0043229	organelle//cell//cell part//intracellular part//intracellular//cellular_component//intracellular membrane-bounded organelle//membrane-bounded organelle//nucleus//intracellular organelle	GO:0048037//GO:0051287//GO:0046914//GO:0005488//GO:0008270//GO:0036094//GO:0016787//GO:0097159//GO:0003676//GO:0003824//GO:0043169//GO:0003677//GO:0070403//GO:0046872//GO:0003674//GO:0050662//GO:0004540//GO:1901265//GO:1901363//GO:0004518//GO:0043167//GO:0016788//GO:0000166//GO:0043168//GO:0016151
AAEL000126	supercont1.2	-	234647	315189	2660	607	448	458	419	539	616	490	434	534	11.5039	8.81858	9.42014	9.94868	9.09417	10.2447	9.40714	8.3175	9.56564	9.91422	9.7625	9.09676	494.527	536.88	-0.11855	0.77758	1	FALSE	529.794	469.426	0.17453	0.50155	0.94922	FALSE	447.997	546.088	-0.28565	0.40807	1	FALSE	GO:0051259//GO:0019538//GO:0006732//GO:1901576//GO:0051188//GO:0019637//GO:0043933//GO:0051189//GO:1901362//GO:0044260//GO:0006796//GO:0046483//GO:0009987//GO:0006807//GO:0071840//GO:0044267//GO:0009108//GO:1901564//GO:0006461//GO:0071822//GO:1901360//GO:0009058//GO:0090407//GO:0044249//GO:0065003//GO:0006793//GO:0071704//GO:0044237//GO:0022607//GO:0070271//GO:0018130//GO:1901566//GO:0008150//GO:…	protein oligomerization//protein metabolic process//coenzyme metabolic process//organic substance biosynthetic process//cofactor biosynthetic process//organophosphate metabolic process//macromolecular complex subunit organization//prosthetic group metabolic process//organic cyclic compound biosynthetic process//cellular macromolecule metabolic process//phosphate-containing compound metabolic proc…	--	--	GO:0005488//GO:0003824//GO:0003674//GO:0051536//GO:0051540
AAEL000127	supercont1.2	+	4758426	4760230	1632	124	106	84	160	234	296	335	284	219	3.83037	3.40085	2.816	6.19203	6.43504	8.02362	10.4826	8.87121	6.39409	3.34907	6.88356	8.58262	215.886	109.774	0.97574	0.0042022	0.087187	FALSE	231.229	277.161	-0.2614	0.56865	0.98383	FALSE	264.479	111.587	1.245	0.0024828	0.088756	FALSE	GO:0008152//GO:0008150	metabolic process//biological_process	GO:0019013//GO:0044423//GO:0005575//GO:0019012//GO:0019028	viral nucleocapsid//virion part//cellular_component//virion//viral capsid	GO:1901363//GO:0003676//GO:0097159//GO:0003824//GO:0003723//GO:0003674//GO:0005488
AAEL000128	supercont1.2	-	193030	228985	3745	3103	2242	1634	2141	3004	2992	2450	2023	2706	41.7705	31.3463	23.8712	36.1075	36.0001	35.3434	33.4085	27.5378	34.4295	32.3293	35.817	31.7919	2545.12	2434.26	0.064251	0.77158	1	FALSE	2726.87	2299.89	0.24568	0.31497	0.81668	FALSE	2194.95	2474.12	-0.17273	0.58699	1	FALSE	GO:0050794//GO:0016265//GO:0050789//GO:0034645//GO:0071704//GO:0043066//GO:0008219//GO:0042981//GO:0044237//GO:0006139//GO:0012501//GO:0048523//GO:0008150//GO:0060548//GO:0051726//GO:0048519//GO:0043069//GO:0006260//GO:0043170//GO:0044238//GO:0044699//GO:0009059//GO:0008152//GO:1901576//GO:0034641//GO:0090304//GO:0006915//GO:0044763//GO:0006259//GO:0007049//GO:0044260//GO:0010941//GO:0043067//GO:…	regulation of cellular process//death//regulation of biological process//cellular macromolecule biosynthetic process//organic substance metabolic process//negative regulation of apoptotic process//cell death//regulation of apoptotic process//cellular metabolic process//nucleobase-containing compound metabolic process//programmed cell death//negative regulation of cellular process//biological_proc…	GO:0005694//GO:0070013//GO:0043227//GO:0043232//GO:0031981//GO:0019028//GO:0043231//GO:0032991//GO:0005575//GO:0044423//GO:0005622//GO:0043233//GO:0044428//GO:0005664//GO:0044427//GO:0005634//GO:0043229//GO:0000228//GO:0005623//GO:0043226//GO:0044454//GO:0043228//GO:0019012//GO:0031974//GO:0044446//GO:0044424//GO:0000808//GO:0044464//GO:0044422//GO:0043234	chromosome//intracellular organelle lumen//membrane-bounded organelle//intracellular non-membrane-bounded organelle//nuclear lumen//viral capsid//intracellular membrane-bounded organelle//macromolecular complex//cellular_component//virion part//intracellular//organelle lumen//nuclear part//nuclear origin of replication recognition complex//chromosomal part//nucleus//intracellular organelle//nucle…	GO:0003674//GO:1901363//GO:0005488//GO:0005515//GO:0005521//GO:0003677//GO:0003676//GO:0097159
AAEL000129	supercont1.2	+	4103995	4118570	1974	0	2	0	1	0	0	4	0	2	0	0.0530499	0	0.0319953	0	0	0.10348	0	0.0482767	0.0176833	0.0106651	0.0505855	0.361747	0.567322	-0.64919	0.97751	1	FALSE	0.388595	1.8352	-2.2396	0.53417	0.96288	FALSE	1.75185	0.571315	1.6165	0.74368	1	FALSE	--	--	--	--	--
AAEL000130	supercont1.2	+	347190	348596	1407	0	0	0	0	0	0	0	0	0	0	0	0	0	0	0	0	0	0	0	0	0	0	0	NA	NA	NA	NA	0	0	NA	NA	NA	NA	0	0	NA	NA	NA	NA	--	--	GO:0019013//GO:0019012//GO:0019028//GO:0005575//GO:0044423	viral nucleocapsid//virion//viral capsid//cellular_component//virion part	--
AAEL000132	supercont1.2	-	4945066	4948393	2048	4	0	0	0	3	0	4	5	3	0.0984622	0	0	0	0.0657426	0	0.0997408	0.124458	0.0697984	0.0328207	0.0219142	0.0979993	0.814841	1.43483	-0.81629	0.96362	1	FALSE	0.873999	4.03366	-2.2064	0.36468	0.86065	FALSE	3.84883	1.45923	1.3992	0.51244	1	FALSE	GO:0008150//GO:0008152	biological_process//metabolic process	--	--	GO:0003824//GO:0003674
AAEL000133	supercont1.2	+	721406	722749	288	0	0	0	0	0	0	0	0	0	0	0	0	0	0	0	0	0	0	0	0	0	0	0	NA	NA	NA	NA	0	0	NA	NA	NA	NA	0	0	NA	NA	NA	NA	--	--	--	--	--
AAEL000134	supercont1.2	+	5615964	5623059	2103	10	5	3	15	15	9	14	7	15	0.239718	0.12449	0.0780469	0.45049	0.320116	0.189322	0.339963	0.169685	0.339865	0.147418	0.319976	0.283171	12.3722	6.26345	0.98207	0.38257	1	FALSE	13.2663	11.2567	0.23698	0.84467	1	FALSE	10.7442	6.36463	0.75542	0.44112	1	FALSE	GO:0016032//GO:0009987//GO:0008150//GO:0044419//GO:0044764//GO:0051704//GO:0044403//GO:0019058	viral process//cellular process//biological_process//interspecies interaction between organisms//multi-organism cellular process//multi-organism process//symbiosis, encompassing mutualism through parasitism//viral life cycle	--	--	--
AAEL000136	supercont1.2	+	5538929	5540818	1827	35	128	48	47	56	43	79	71	114	0.965759	3.66837	1.4374	1.62477	1.37564	1.04119	2.20816	1.98109	2.97318	2.02384	1.3472	2.38748	45.933	68.9923	-0.5869	0.22042	0.99768	FALSE	49.2338	83.5038	-0.76219	0.054539	0.35944	FALSE	79.6978	69.9447	0.18832	0.79482	1	FALSE	--	--	GO:0043226//GO:0043231//GO:0043227//GO:0005623//GO:0005622//GO:0005575//GO:0044464//GO:0044424//GO:0043229//GO:0005634	organelle//intracellular membrane-bounded organelle//membrane-bounded organelle//cell//intracellular//cellular_component//cell part//intracellular part//intracellular organelle//nucleus	GO:0003674//GO:0005515//GO:0046914//GO:0008270//GO:0005488//GO:0043167//GO:0046872//GO:0046983//GO:0097159//GO:1901363//GO:0003676//GO:0043169//GO:0003677
AAEL000137	supercont1.2	+	1155969	1224123	2794	39	57	40	37	47	45	58	43	42	0.703684	1.06819	0.783262	0.836389	0.754966	0.7125	1.06009	0.784561	0.716271	0.851714	0.767952	0.853642	40.5092	46.9324	-0.21234	0.69313	1	FALSE	43.4075	46.6876	-0.1051	0.88701	1	FALSE	44.5539	47.6869	-0.098041	0.80353	1	FALSE	GO:0009889//GO:0050794//GO:0019222//GO:0044763//GO:0019438//GO:0097659//GO:0090304//GO:0034641//GO:1901576//GO:0031323//GO:0060255//GO:0071704//GO:0031326//GO:0051171//GO:0034645//GO:0034654//GO:0050789//GO:0016070//GO:0055085//GO:0044237//GO:1901362//GO:0044260//GO:0044765//GO:0018130//GO:0044271//GO:2001141//GO:0080090//GO:0010556//GO:0008150//GO:0046483//GO:0009987//GO:0019219//GO:0065007//GO:…	regulation of biosynthetic process//regulation of cellular process//regulation of metabolic process//single-organism cellular process//aromatic compound biosynthetic process//nucleic acid-templated transcription//nucleic acid metabolic process//cellular nitrogen compound metabolic process//organic substance biosynthetic process//regulation of cellular metabolic process//regulation of macromolecul…	GO:0016021//GO:0005575//GO:0031224//GO:0016020//GO:0044425	integral component of membrane//cellular_component//intrinsic component of membrane//membrane//membrane part	GO:0015297//GO:0015298//GO:0015078//GO:0015299//GO:0008324//GO:0022857//GO:0022804//GO:0005488//GO:0003674//GO:0015075//GO:0015077//GO:0003677//GO:0022892//GO:0005215//GO:0097159//GO:1901363//GO:0022890//GO:0003676//GO:0015291//GO:0022891
AAEL000138	supercont1.2	-	5518950	5523843	576	612	553	481	368	655	529	631	460	603	53.5634	50.2695	45.6874	40.3514	51.0358	40.6286	55.9435	40.7118	49.8826	49.8401	44.0052	48.846	479.825	578.103	-0.26882	0.42788	1	FALSE	514.119	543.766	-0.080885	0.85285	1	FALSE	518.951	587.783	-0.17968	0.60019	1	FALSE	--	--	--	--	--
AAEL000139	supercont1.2	-	651168	652909	1166	0	0	0	4	0	28	0	0	0	0	0	0	0.216668	0	1.06233	0	0	0	0	0.426332	0	10.3813	0	Inf	0.10129	0.7173	FALSE	11.0973	0	Inf	0.090335	0.47006	FALSE	0	0	NA	NA	NA	NA	--	--	--	--	--
AAEL000140	supercont1.2	-	5663923	5670997	2065	68	142	66	92	131	83	106	91	124	1.66008	3.60056	1.74863	2.81385	2.84713	1.7781	2.62137	2.2465	2.86125	2.33642	2.47969	2.57637	95.346	92.3493	0.046071	0.99535	1	FALSE	102.203	102.69	-0.0068571	0.9975	1	FALSE	98.005	93.7122	0.064619	0.98414	1	FALSE	GO:0006818//GO:0033036//GO:0034220//GO:0045184//GO:0055085//GO:0016482//GO:0015991//GO:1902582//GO:0098662//GO:0071702//GO:0044763//GO:0070727//GO:0015988//GO:0034613//GO:0090662//GO:0051179//GO:0051649//GO:0006810//GO:0048193//GO:0006812//GO:1902600//GO:0006888//GO:1902578//GO:0009987//GO:0046907//GO:0051641//GO:0044765//GO:0015672//GO:0098655//GO:0015992//GO:0006886//GO:0015031//GO:0008104//GO:…	hydrogen transport//macromolecule localization//ion transmembrane transport//establishment of protein localization//transmembrane transport//cytoplasmic transport//ATP hydrolysis coupled proton transport//single-organism intracellular transport//inorganic cation transmembrane transport//organic substance transport//single-organism cellular process//cellular macromolecule localization//energy coup…	GO:0012506//GO:0005737//GO:0016023//GO:0098805//GO:0033177//GO:0043226//GO:0005623//GO:0033176//GO:0030120//GO:0030134//GO:0044422//GO:0030117//GO:0030658//GO:0043234//GO:0044433//GO:0031090//GO:0044464//GO:0030659//GO:0016020//GO:0048475//GO:0030662//GO:0098588//GO:0044446//GO:0044424//GO:0016469//GO:0031982//GO:0031410//GO:0012505//GO:0005622//GO:0032991//GO:0005575//GO:0043227//GO:0043231//GO:…	vesicle membrane//cytoplasm//cytoplasmic membrane-bounded vesicle//whole membrane//proton-transporting two-sector ATPase complex, proton-transporting domain//organelle//cell//proton-transporting V-type ATPase complex//vesicle coat//ER to Golgi transport vesicle//organelle part//membrane coat//transport vesicle membrane//protein complex//cytoplasmic vesicle part//organelle membrane//cell part//cyt…	GO:0005488//GO:0008270//GO:0046914//GO:0008324//GO:0015078//GO:0003676//GO:0097159//GO:0043169//GO:0015077//GO:0046872//GO:0003674//GO:0015075//GO:0022857//GO:0022891//GO:1901363//GO:0022890//GO:0022892//GO:0005215//GO:0043167
AAEL000141	supercont1.2	-	5089820	5095503	759	0	0	0	0	0	0	0	0	0	0	0	0	0	0	0	0	0	0	0	0	0	0	0	NA	NA	NA	NA	0	0	NA	NA	NA	NA	0	0	NA	NA	NA	NA	--	--	--	--	--
AAEL000143	supercont1.2	-	2500480	2501737	1202	354	379	283	258	385	341	272	206	318	14.847	16.5096	12.8812	13.5565	14.3751	12.5501	11.556	8.7367	12.606	14.7459	13.4939	10.9662	306.709	353.167	-0.20348	0.53811	1	FALSE	328.64	252.825	0.37837	0.19092	0.67673	FALSE	241.297	358.933	-0.5729	0.083128	0.7772	FALSE	GO:0044763//GO:0030261//GO:1902589//GO:0006323//GO:0051276//GO:0016043//GO:0071840//GO:0006807//GO:0007059//GO:0008150//GO:0009987//GO:0008152//GO:0006996//GO:0071103//GO:0044699	single-organism cellular process//chromosome condensation//single-organism organelle organization//DNA packaging//chromosome organization//cellular component organization//cellular component organization or biogenesis//nitrogen compound metabolic process//chromosome segregation//biological_process//cellular process//metabolic process//organelle organization//DNA conformation change//single-organi…	GO:0005623//GO:0005737//GO:0005622//GO:0005575//GO:0044464//GO:0044424	cell//cytoplasm//intracellular//cellular_component//cell part//intracellular part	GO:0016787//GO:0016810//GO:0003674//GO:0003824
AAEL000144	supercont1.2	+	1087286	1087978	636	0	0	0	0	0	2	0	0	0	0	0	0	0	0	0.139114	0	0	0	0	0.0463714	0	0.638166	0	Inf	0.88726	1	FALSE	0.681638	0	Inf	0.81319	1	FALSE	0	0	NA	NA	NA	NA	GO:0006807//GO:1901564//GO:1901071//GO:0006030//GO:0006022//GO:0043170//GO:0008152//GO:1901135//GO:0008150//GO:0006040//GO:0071704	nitrogen compound metabolic process//organonitrogen compound metabolic process//glucosamine-containing compound metabolic process//chitin metabolic process//aminoglycan metabolic process//macromolecule metabolic process//metabolic process//carbohydrate derivative metabolic process//biological_process//amino sugar metabolic process//organic substance metabolic process	GO:0005576//GO:0005575	extracellular region//cellular_component	GO:0005488//GO:0097367//GO:0008061//GO:0003674
AAEL000145	supercont1.2	+	3901611	3954417	495	0	0	0	1	0	0	2	0	1	0	0	0	0.127593	0	0	0.206333	0	0.0962608	0	0.0425311	0.100864	0.361747	0	Inf	1	1	FALSE	0.388595	0.917599	-1.2396	0.86589	1	FALSE	0.875927	0	Inf	0.72604	1	FALSE	--	--	--	--	--
AAEL000146	supercont1.2	+	2517771	2518702	875	83	50	44	87	89	88	18	11	16	4.782	2.99202	2.75118	6.27978	4.56497	4.44911	1.05053	0.640869	0.871297	3.5084	5.09795	0.854231	83.7249	62.4074	0.42394	0.3178	1	FALSE	89.7284	14.3719	2.6423	3.0305e-08	2.3608e-06	UP	13.7163	63.4565	-2.2099	0.00019683	0.013092	DOWN	GO:0008152//GO:0008150//GO:0006807	metabolic process//biological_process//nitrogen compound metabolic process	--	--	GO:0003674//GO:0016787//GO:0016810//GO:0003824
AAEL000147	supercont1.2	+	5109811	5110635	749	60	94	80	103	197	119	204	119	215	4.0384	6.57125	5.84362	8.68537	11.8043	7.02852	13.9089	8.09934	13.6776	5.48442	9.17273	11.8953	128.739	81.7349	0.65542	0.072315	0.59696	FALSE	137.975	169.647	-0.29812	0.38143	0.87168	FALSE	161.917	83.0941	0.96244	0.007334	0.18881	FALSE	--	--	--	--	GO:0003677//GO:0003676//GO:0097159//GO:0005488//GO:1901363//GO:0003697//GO:0003674
AAEL000148	supercont1.2	+	5659890	5663980	1305	27	38	25	23	24	32	30	31	38	1.04302	1.52467	1.0481	1.11314	0.825385	1.08477	1.17396	1.21098	1.38748	1.20526	1.00777	1.25747	25.0496	30.9481	-0.30506	0.61856	1	FALSE	26.8359	31.8635	-0.24774	0.65824	1	FALSE	30.4089	31.4404	-0.048126	0.92755	1	FALSE	--	--	GO:0005623//GO:0043226//GO:0044424//GO:0044464//GO:0005575//GO:0005622//GO:0043231//GO:0043227//GO:0005634//GO:0043229	cell//organelle//intracellular part//cell part//cellular_component//intracellular//intracellular membrane-bounded organelle//membrane-bounded organelle//nucleus//intracellular organelle	GO:0046914//GO:0005488//GO:0008270//GO:0043169//GO:0097159//GO:0003676//GO:0046872//GO:0003674//GO:1901363//GO:0043167
AAEL000149	supercont1.2	+	5041004	5042540	997	71	205	91	102	202	77	214	124	276	3.59007	10.7662	4.99367	6.46157	9.0931	3.4166	10.9613	6.34032	13.1907	6.44997	6.32376	10.1641	116.334	121.78	-0.066009	0.858	1	FALSE	124.729	191.064	-0.61526	0.07678	0.43466	FALSE	182.369	123.539	0.5619	0.13081	0.90479	FALSE	--	--	--	--	GO:0005488//GO:0005515//GO:0003674
AAEL000150	supercont1.2	+	2528995	2529894	843	687	420	427	488	615	602	252	276	232	41.0836	26.087	27.7124	36.5616	32.7419	31.5913	15.2657	16.6904	13.1134	31.6277	33.6316	15.0231	535.663	544.634	-0.023962	0.96348	1	FALSE	573.977	250.486	1.1963	1.2178e-05	0.0004959	UP	239.028	553.962	-1.2126	0.0070624	0.18504	FALSE	GO:0006807//GO:0008150//GO:0008152	nitrogen compound metabolic process//biological_process//metabolic process	--	--	GO:0003824//GO:0016787//GO:0016810//GO:0003674
AAEL000151	supercont1.2	-	32516	33192	612	0	0	0	0	0	0	0	0	0	0	0	0	0	0	0	0	0	0	0	0	0	0	0	NA	NA	NA	NA	0	0	NA	NA	NA	NA	0	0	NA	NA	NA	NA	--	--	--	--	--
AAEL000152	supercont1.2	+	235014	235640	627	0	0	0	0	0	0	0	0	0	0	0	0	0	0	0	0	0	0	0	0	0	0	0	NA	NA	NA	NA	0	0	NA	NA	NA	NA	0	0	NA	NA	NA	NA	--	--	--	--	--
AAEL000153	supercont1.2	-	2341378	2402656	4617	3	6	10	6	17	0	8	6	10	0.0327567	0.0680446	0.118499	0.0820775	0.165251	0	0.0884857	0.0662485	0.103204	0.0731	0.0824429	0.0859792	6.78791	6.97162	-0.038526	0.95713	1	FALSE	7.28423	7.58541	-0.058451	1	1	FALSE	7.23971	7.1026	0.027585	0.94643	1	FALSE	--	--	--	--	--
AAEL000154	supercont1.2	-	5075337	5085916	2983	5	253	33	83	134	14	112	56	208	0.0844999	4.44088	0.605249	1.75735	2.01608	0.207622	1.91738	0.957016	3.3225	1.71021	1.32702	2.06563	70.8884	87.3984	-0.30206	0.72778	1	FALSE	76.0634	113.463	-0.57694	0.35485	0.85458	FALSE	108.314	88.2664	0.29528	0.89631	1	FALSE	GO:0018130//GO:0044237//GO:0031323//GO:0006352//GO:0071704//GO:0051171//GO:0034654//GO:0034645//GO:0050789//GO:0009889//GO:0050794//GO:0097659//GO:0010468//GO:0008152//GO:0006355//GO:0009059//GO:0044238//GO:0043170//GO:2000112//GO:0010467//GO:0010556//GO:0008150//GO:0019219//GO:0006139//GO:0044271//GO:2001141//GO:0080090//GO:0016070//GO:1901362//GO:0044260//GO:0060255//GO:0031326//GO:0019222//GO:…	heterocycle biosynthetic process//cellular metabolic process//regulation of cellular metabolic process//DNA-templated transcription, initiation//organic substance metabolic process//regulation of nitrogen compound metabolic process//nucleobase-containing compound biosynthetic process//cellular macromolecule biosynthetic process//regulation of biological process//regulation of biosynthetic process…	--	--	GO:0003674//GO:0003700//GO:1901363//GO:0000988//GO:0005488//GO:0000996//GO:0097159//GO:0003676//GO:0016987//GO:0003677//GO:0000990//GO:0001071
AAEL000155	supercont1.2	-	4359005	4365844	1608	4	4	3	3	3	1	1	1	0	0.125405	0.130249	0.102073	0.117833	0.0837319	0.0275114	0.0317583	0.0317029	0	0.119242	0.0763589	0.0211537	2.21916	3.82754	-0.7864	0.73874	1	FALSE	2.3806	0.712284	1.7408	0.53695	0.96414	FALSE	0.679496	3.89013	-2.5173	0.25675	1	FALSE	GO:0044763//GO:0035556//GO:0050794//GO:0007165//GO:0050789//GO:0044700//GO:0051716//GO:0007154//GO:0065007//GO:0008150//GO:0009987//GO:0023052//GO:0044699//GO:0050896	single-organism cellular process//intracellular signal transduction//regulation of cellular process//signal transduction//regulation of biological process//single organism signaling//cellular response to stimulus//cell communication//biological regulation//biological_process//cellular process//signaling//single-organism process//response to stimulus	--	--	GO:0005488//GO:0005515//GO:0003674
AAEL000156	supercont1.2	-	1449986	1473030	369	0	0	0	1	4	1	0	2	0	0	0	0	0.171162	0.486507	0.119887	0	0.276305	0	0	0.259185	0.0921015	1.76728	0	Inf	0.48215	1	FALSE	1.89474	0.77298	1.2935	0.63287	1	FALSE	0.737155	0	Inf	0.84197	1	FALSE	--	--	--	--	GO:0004521//GO:0016788//GO:0004523//GO:0003677//GO:0004518//GO:0003824//GO:1901363//GO:0003676//GO:0097159//GO:0004519//GO:0016893//GO:0016787//GO:0005488//GO:0004540//GO:0005515//GO:0016891//GO:0003674
AAEL000157	supercont1.2	+	5571954	5591365	2862	24	102	30	44	79	41	61	29	117	0.422747	1.86609	0.573489	0.970993	1.23883	0.633743	1.08844	0.516551	1.94792	0.954109	0.947857	1.1843	50.4567	50.123	0.0095741	0.91325	1	FALSE	54.087	62.205	-0.20175	0.60087	0.99539	FALSE	59.3833	50.7751	0.22593	0.78314	1	FALSE	GO:0036211//GO:1901360//GO:0008152//GO:0006725//GO:0006399//GO:0044238//GO:0043170//GO:0010467//GO:0044267//GO:0008150//GO:0046483//GO:0009987//GO:0006807//GO:0006139//GO:0043412//GO:0016070//GO:0044237//GO:0044260//GO:0071704//GO:0006464//GO:0008033//GO:0019538//GO:0034470//GO:0034660//GO:0090304//GO:0034641//GO:0006396	protein modification process//organic cyclic compound metabolic process//metabolic process//cellular aromatic compound metabolic process//tRNA metabolic process//primary metabolic process//macromolecule metabolic process//gene expression//cellular protein metabolic process//biological_process//heterocycle metabolic process//cellular process//nitrogen compound metabolic process//nucleobase-contain…	GO:0043229//GO:0005634//GO:0044464//GO:0044424//GO:0005622//GO:0005575//GO:0043231//GO:0043226//GO:0043227//GO:0005623	intracellular organelle//nucleus//cell part//intracellular part//intracellular//cellular_component//intracellular membrane-bounded organelle//organelle//membrane-bounded organelle//cell	GO:0097159//GO:1901363//GO:0003676//GO:0043169//GO:0003824//GO:0003677//GO:0004518//GO:0043167//GO:0016788//GO:0046872//GO:0016151//GO:0003674//GO:0004540//GO:0046914//GO:0008270//GO:0005488//GO:0016787
AAEL000159	supercont1.3	-	1313948	1332185	2575	736	760	570	583	672	760	759	636	794	14.4092	15.4539	12.1108	14.2996	11.7125	13.0568	15.0525	12.5911	14.6926	13.9913	13.0229	14.112	635.926	718.623	-0.17638	0.52641	1	FALSE	681.349	704.298	-0.047794	0.86663	1	FALSE	672.15	730.369	-0.11984	0.69371	1	FALSE	--	--	--	--	GO:0043167//GO:0003674//GO:0043169//GO:0046872//GO:0005488//GO:0008270//GO:0046914
AAEL000160	supercont1.3	-	4885101	4900578	177	0	0	0	0	0	0	0	0	0	0	0	0	0	0	0	0	0	0	0	0	0	0	0	NA	NA	NA	NA	0	0	NA	NA	NA	NA	0	0	NA	NA	NA	NA	--	--	--	--	--
AAEL000161	supercont1.3	-	1147929	1174339	2928	17	10	12	19	34	24	7	13	16	0.292696	0.178826	0.224225	0.409841	0.521151	0.362609	0.122087	0.226338	0.260377	0.231916	0.4312	0.202934	23.766	13.9669	0.76689	0.27734	1	FALSE	25.4683	11.5611	1.1394	0.080899	0.446	FALSE	11.0334	14.2114	-0.36517	0.72755	1	FALSE	--	--	--	--	--
AAEL000162	supercont1.3	-	1653660	1696832	1320	40	45	58	37	30	42	58	70	71	1.52766	1.78501	2.40396	1.77036	1.02001	1.40758	2.24387	2.70339	2.56294	1.90554	1.39932	2.5034	34.9345	51.4356	-0.55811	0.32477	1	FALSE	37.4324	64.8372	-0.79253	0.072869	0.42288	FALSE	61.8741	52.3534	0.24105	0.54371	1	FALSE	GO:0007600//GO:0044699//GO:0051606//GO:0050896//GO:0042221//GO:0003008//GO:0050877//GO:0008150//GO:0009593//GO:0007606//GO:0050909//GO:0032501//GO:0044707//GO:0050907//GO:0050906//GO:0050912	sensory perception//single-organism process//detection of stimulus//response to stimulus//response to chemical//system process//neurological system process//biological_process//detection of chemical stimulus//sensory perception of chemical stimulus//sensory perception of taste//multicellular organismal process//single-multicellular organism process//detection of chemical stimulus involved in sens…	GO:0044425//GO:0016020//GO:0031224//GO:0005575//GO:0016021	membrane part//membrane//intrinsic component of membrane//cellular_component//integral component of membrane	GO:0004888//GO:0060089//GO:0003674//GO:0008527//GO:0004930//GO:0004871//GO:0038023//GO:0004872
AAEL000163	supercont1.3	-	1217709	1218978	1097	71	94	69	92	105	113	35	32	43	3.2628	4.48666	3.44125	5.29681	4.29574	4.55691	1.62931	1.48706	1.86774	3.73024	4.71649	1.66137	97.8565	81.0678	0.27154	0.51781	1	FALSE	104.853	35.209	1.5744	0.00011642	0.0034934	UP	33.6025	82.3833	-1.2938	0.0044612	0.13592	FALSE	--	--	--	--	--
AAEL000164	supercont1.3	-	818820	823944	2339	1086	871	646	665	818	1008	504	627	594	23.4066	19.498	15.1104	17.9566	15.6956	19.0647	11.0038	13.6654	12.1007	19.3383	17.5723	12.2566	784.377	907.528	-0.21039	0.46881	1	FALSE	840.271	564.54	0.57378	0.024178	0.22005	FALSE	538.73	922.396	-0.77582	0.011981	0.26428	FALSE	GO:0044699//GO:0008152//GO:0008150//GO:0044710//GO:0055114	single-organism process//metabolic process//biological_process//single-organism metabolic process//oxidation-reduction process	--	--	GO:0003674//GO:0016491//GO:0003824
AAEL000165	supercont1.3	+	4483570	4525766	619	44	48	50	57	84	86	55	34	45	3.64828	4.13371	4.49925	5.92113	6.20057	6.2574	4.61958	2.85075	3.52666	4.09375	6.12636	3.66566	70.8763	50.3666	0.49284	0.25127	1	FALSE	75.9323	43.0298	0.81938	0.046993	0.32922	FALSE	41.0662	51.2342	-0.31916	0.56611	1	FALSE	--	--	--	--	--
AAEL000166	supercont1.3	+	1073567	1084384	648	7	2	5	10	9	8	3	3	2	0.544581	0.161606	0.422152	0.974671	0.623337	0.546152	0.236423	0.23601	0.147065	0.376113	0.71472	0.206499	8.61466	5.17505	0.73522	0.5482	1	FALSE	9.23449	2.66887	1.7908	0.13452	0.57198	FALSE	2.54667	5.27208	-1.0498	0.54329	1	FALSE	--	--	--	--	--
AAEL000167	supercont1.3	+	4632136	4632867	732	0	0	0	0	0	0	0	0	0	0	0	0	0	0	0	0	0	0	0	0	0	0	0	NA	NA	NA	NA	0	0	NA	NA	NA	NA	0	0	NA	NA	NA	NA	GO:0044710//GO:0055114//GO:0044699//GO:0008152//GO:0008150	single-organism metabolic process//oxidation-reduction process//single-organism process//metabolic process//biological_process	--	--	GO:0047134//GO:0005488//GO:0016491//GO:0003824//GO:0043169//GO:0046872//GO:0003674//GO:0016668//GO:0016651//GO:0016667//GO:0043167
AAEL000170	supercont1.3	-	1769513	1783288	2296	24	92	34	40	59	34	68	56	89	0.527421	2.09989	0.810885	1.10128	1.15429	0.655668	1.51377	1.24445	1.84863	1.14607	0.970414	1.53562	41.3439	48.9638	-0.24404	0.5576	1	FALSE	44.3203	67.4725	-0.60633	0.15877	0.6213	FALSE	64.3968	49.6363	0.37559	0.51413	1	FALSE	GO:0044271//GO:0007154//GO:0018130//GO:0007166//GO:0044237//GO:0051716//GO:0016070//GO:0044260//GO:1901362//GO:0044700//GO:0006366//GO:0006352//GO:0050789//GO:0034645//GO:0007165//GO:0034654//GO:0071704//GO:0050794//GO:1901576//GO:0034641//GO:0090304//GO:0097659//GO:0044763//GO:0019438//GO:0050896//GO:0009058//GO:1901360//GO:0009059//GO:0008152//GO:0044249//GO:0006725//GO:0044699//GO:0043170//GO:…	cellular nitrogen compound biosynthetic process//cell communication//heterocycle biosynthetic process//cell surface receptor signaling pathway//cellular metabolic process//cellular response to stimulus//RNA metabolic process//cellular macromolecule metabolic process//organic cyclic compound biosynthetic process//single organism signaling//transcription from RNA polymerase II promoter//DNA-templat…	GO:0005622//GO:0030880//GO:1990234//GO:0055029//GO:0016591//GO:0031974//GO:0005654//GO:0005575//GO:0032991//GO:0061695//GO:0005672//GO:0000428//GO:0031981//GO:0043231//GO:0043226//GO:0043227//GO:0044451//GO:0005667//GO:0005623//GO:0070013//GO:0005634//GO:0043229//GO:0090575//GO:0043234//GO:0044422//GO:0044798//GO:1902494//GO:0044464//GO:0044424//GO:0044428//GO:0043233//GO:0044446	intracellular//RNA polymerase complex//transferase complex//nuclear DNA-directed RNA polymerase complex//DNA-directed RNA polymerase II, holoenzyme//membrane-enclosed lumen//nucleoplasm//cellular_component//macromolecular complex//transferase complex, transferring phosphorus-containing groups//transcription factor TFIIA complex//DNA-directed RNA polymerase complex//nuclear lumen//intracellular me…	GO:0003674//GO:0046914//GO:0005515//GO:0005488//GO:0008270//GO:0008013//GO:0043169//GO:0043167//GO:0046872
AAEL000172	supercont1.3	-	4540652	4564437	6992	763	1510	599	927	1341	874	979	735	1416	5.50126	11.3078	4.68704	8.37358	8.60762	5.52979	7.1503	5.35884	9.64976	7.16537	7.50367	7.3863	978.452	953.215	0.037699	0.96535	1	FALSE	1048.78	979.695	0.098308	0.75684	1	FALSE	935.085	966.915	-0.048293	0.77429	1	FALSE	GO:1902578//GO:0009987//GO:0006643//GO:0006810//GO:0009311//GO:0016051//GO:0005975//GO:0090407//GO:0044249//GO:0044710//GO:0009058//GO:0009247//GO:0051179//GO:0008610//GO:1901576//GO:0044763//GO:0009245//GO:0019637//GO:0046493//GO:0006629//GO:0006796//GO:0051234//GO:0006664//GO:0008150//GO:1901271//GO:0044723//GO:1901137//GO:1901269//GO:0006811//GO:0044238//GO:0009312//GO:0044699//GO:0008152//GO:…	single-organism localization//cellular process//membrane lipid metabolic process//transport//oligosaccharide metabolic process//carbohydrate biosynthetic process//carbohydrate metabolic process//organophosphate biosynthetic process//cellular biosynthetic process//single-organism metabolic process//biosynthetic process//glycolipid biosynthetic process//localization//lipid biosynthetic process//org…	GO:0016020//GO:0005575	membrane//cellular_component	GO:0005216//GO:0003824//GO:0015267//GO:0016757//GO:0008194//GO:0022803//GO:0016740//GO:0022838//GO:0016758//GO:0008915//GO:0022891//GO:0022892//GO:0005215//GO:0022857//GO:0015075//GO:0003674
AAEL000173	supercont1.3	-	1847559	1849128	958	20	88	27	70	85	49	66	31	118	1.05246	4.80971	1.54196	4.61493	3.98207	2.26271	3.51821	1.64961	5.86909	2.46804	3.61991	3.67897	64.0445	43.4589	0.55942	0.3759	1	FALSE	68.665	64.873	0.081958	1	1	FALSE	61.9291	44.0284	0.49218	0.48132	1	FALSE	--	--	--	--	--
AAEL000174	supercont1.3	+	3507432	3523118	1089	6	19	4	16	24	7	14	13	35	0.277756	0.91354	0.200958	0.927951	0.989097	0.28436	0.656513	0.608555	1.53142	0.464085	0.733803	0.932163	14.5403	9.21922	0.65734	0.57896	1	FALSE	15.5952	18.8959	-0.27697	0.65481	1	FALSE	18.0375	9.33403	0.95043	0.27029	1	FALSE	--	--	--	--	--
AAEL000175	supercont1.3	+	1358383	1369397	2470	1534	1852	1205	1821	2180	1959	1663	1411	2102	31.3089	39.2596	26.6909	46.5635	39.611	35.0862	34.3826	29.1216	40.5499	32.4198	40.4202	34.6847	1875.94	1580.92	0.24685	0.36115	1	FALSE	2010.4	1646.29	0.28827	0.27751	0.78134	FALSE	1571.22	1606.11	-0.031686	0.91731	1	FALSE	GO:0044699//GO:0043170//GO:0043604//GO:0044238//GO:0009058//GO:0008152//GO:0009059//GO:0044249//GO:0009987//GO:0043603//GO:0008150//GO:0006807//GO:0065007//GO:0010467//GO:0044267//GO:0051726//GO:0043043//GO:1901564//GO:0044237//GO:0044260//GO:0044271//GO:0006413//GO:1901566//GO:0050794//GO:0019538//GO:0034641//GO:1901576//GO:0044763//GO:0006412//GO:0034645//GO:0050789//GO:0007049//GO:0006518//GO:…	single-organism process//macromolecule metabolic process//amide biosynthetic process//primary metabolic process//biosynthetic process//metabolic process//macromolecule biosynthetic process//cellular biosynthetic process//cellular process//cellular amide metabolic process//biological_process//nitrogen compound metabolic process//biological regulation//gene expression//cellular protein metabolic pr…	GO:0043234//GO:0044444//GO:0005634//GO:0043229//GO:0005852//GO:0044424//GO:0044464//GO:0005575//GO:0032991//GO:0005622//GO:0005737//GO:0005623//GO:0043226//GO:0043231//GO:0043227	protein complex//cytoplasmic part//nucleus//intracellular organelle//eukaryotic translation initiation factor 3 complex//intracellular part//cell part//cellular_component//macromolecular complex//intracellular//cytoplasm//cell//organelle//intracellular membrane-bounded organelle//membrane-bounded organelle	GO:0097159//GO:1901363//GO:0003743//GO:0003676//GO:0003723//GO:0008135//GO:0005515//GO:0031369//GO:0005488//GO:0003674
AAEL000176	supercont1.3	-	1418812	1444002	1719	7	14	3	30	12	7	6	10	10	0.205287	0.426436	0.0954815	1.10225	0.313301	0.180144	0.178245	0.296557	0.277191	0.242402	0.531897	0.250664	16.3454	7.74027	1.0784	0.42786	1	FALSE	17.5396	8.47978	1.0485	0.36485	0.86065	FALSE	8.09218	7.84113	0.045468	0.97224	1	FALSE	GO:0006810//GO:0008150//GO:0051234//GO:1902578//GO:0051179//GO:0044699//GO:0071702//GO:0071705//GO:0051180//GO:0015889//GO:0044765	transport//biological_process//establishment of localization//single-organism localization//localization//single-organism process//organic substance transport//nitrogen compound transport//vitamin transport//cobalamin transport//single-organism transport	--	--	GO:0097159//GO:1901363//GO:0046906//GO:0019842//GO:0003824//GO:0036094//GO:0031419//GO:0003674//GO:0005488
AAEL000178	supercont1.3	-	4712426	4724465	1335	37	105	38	51	65	34	74	59	130	1.3972	4.11823	1.55731	2.4128	2.18518	1.12667	2.8307	2.25297	4.63998	2.35758	1.90822	3.24122	46.9528	58.992	-0.32931	0.41062	1	FALSE	50.3428	81.4932	-0.69489	0.070465	0.41464	FALSE	77.7857	59.81	0.37912	0.43187	1	FALSE	GO:0008150//GO:0008152	biological_process//metabolic process	--	--	GO:0003674//GO:0016740//GO:0016741//GO:0008168//GO:0003824
AAEL000179	supercont1.3	+	1848931	1858506	1119	708	780	602	893	1068	1111	1040	989	1289	31.8965	36.4978	29.4334	50.4028	42.8348	43.9221	47.462	45.0558	54.888	32.6092	45.7199	49.1353	967.625	727.672	0.41116	0.12315	0.78777	FALSE	1036.81	1063.95	-0.037286	0.88883	1	FALSE	1015.4	739.609	0.45721	0.1146	0.87103	FALSE	GO:0016070//GO:0045184//GO:0033036//GO:0044260//GO:0071702//GO:0006464//GO:0008033//GO:0019538//GO:0034470//GO:0034641//GO:0090304//GO:0036211//GO:0051179//GO:1901360//GO:0006725//GO:0006399//GO:0044267//GO:0006810//GO:0009987//GO:0046483//GO:0006807//GO:0043412//GO:0044237//GO:0071704//GO:0034660//GO:0006396//GO:0015031//GO:0008152//GO:0044238//GO:0008104//GO:0043170//GO:0010467//GO:0008150//GO:…	RNA metabolic process//establishment of protein localization//macromolecule localization//cellular macromolecule metabolic process//organic substance transport//cellular protein modification process//tRNA processing//protein metabolic process//ncRNA processing//cellular nitrogen compound metabolic process//nucleic acid metabolic process//protein modification process//localization//organic cyclic …	GO:0005737//GO:0005623//GO:0044464//GO:0044424//GO:0005622//GO:0005575	cytoplasm//cell//cell part//intracellular part//intracellular//cellular_component	GO:0005515//GO:0005488//GO:0036094//GO:0017076//GO:0032550//GO:0097159//GO:0016879//GO:0003824//GO:0001882//GO:0032549//GO:0030554//GO:0003674//GO:0016874//GO:0097367//GO:0005524//GO:0032553//GO:0035639//GO:1901265//GO:1901363//GO:0032559//GO:0032555//GO:0001883//GO:0043167//GO:0043168//GO:0000166
AAEL000180	supercont1.3	+	2041695	2042493	687	32	39	36	38	59	41	41	41	43	2.34819	2.97242	2.86695	3.49349	3.85435	2.64013	3.04769	3.04237	2.9824	2.72918	3.32933	3.02415	42.854	37.6382	0.18723	0.68782	1	FALSE	45.9288	40.6421	0.17642	0.65386	1	FALSE	38.7852	38.2737	0.019152	0.98094	1	FALSE	GO:0044271//GO:1901566//GO:0044237//GO:0044260//GO:0006412//GO:0034645//GO:0006518//GO:0071704//GO:0019538//GO:0034641//GO:1901576//GO:0009058//GO:0009059//GO:0008152//GO:0044249//GO:0043170//GO:0043604//GO:0044238//GO:0044267//GO:0010467//GO:0043043//GO:1901564//GO:0009987//GO:0043603//GO:0008150//GO:0006807	cellular nitrogen compound biosynthetic process//organonitrogen compound biosynthetic process//cellular metabolic process//cellular macromolecule metabolic process//translation//cellular macromolecule biosynthetic process//peptide metabolic process//organic substance metabolic process//protein metabolic process//cellular nitrogen compound metabolic process//organic substance biosynthetic process/…	GO:0005622//GO:0005737//GO:0043228//GO:0005575//GO:0032991//GO:0043226//GO:0043232//GO:0005840//GO:1990904//GO:0005623//GO:0043229//GO:0044444//GO:0030529//GO:0044464//GO:0044424	intracellular//cytoplasm//non-membrane-bounded organelle//cellular_component//macromolecular complex//organelle//intracellular non-membrane-bounded organelle//ribosome//ribonucleoprotein complex//cell//intracellular organelle//cytoplasmic part//intracellular ribonucleoprotein complex//cell part//intracellular part	GO:0003674//GO:0003735//GO:0005198
AAEL000181	supercont1.3	+	733247	784385	5459	501	701	470	471	650	498	389	331	498	4.62662	6.72368	4.71041	5.4493	5.34387	4.03566	3.63898	3.091	4.34681	5.35357	4.94295	3.69226	505.835	575.655	-0.18654	0.5088	1	FALSE	542.122	387.136	0.48578	0.078864	0.43985	FALSE	369.483	584.843	-0.66254	0.031128	0.46589	FALSE	GO:0008152//GO:0044699//GO:0008150//GO:0044710//GO:0055114	metabolic process//single-organism process//biological_process//single-organism metabolic process//oxidation-reduction process	--	--	GO:0003674//GO:0003682//GO:0003824//GO:0005515//GO:0044877//GO:0005488//GO:0016491
AAEL000182	supercont1.3	-	2042262	2042846	503	101	181	105	56	120	88	163	109	125	10.1226	18.8414	11.4208	7.03158	10.707	7.73951	16.5487	11.047	11.8412	13.4616	8.49271	13.1456	80.9308	131.604	-0.70145	0.073561	0.60054	FALSE	86.7133	128.483	-0.56726	0.14523	0.59544	FALSE	122.616	133.639	-0.12419	0.65385	1	FALSE	GO:0044281//GO:0055114//GO:0046034//GO:1901564//GO:0072521//GO:0055086//GO:0009141//GO:0006807//GO:0006753//GO:0009987//GO:0009259//GO:0046483//GO:0044710//GO:1901360//GO:0009144//GO:0009161//GO:0009116//GO:0019693//GO:0009119//GO:0046128//GO:0006725//GO:0009150//GO:0019637//GO:0034641//GO:0042775//GO:0044763//GO:0006122//GO:0006796//GO:1901657//GO:0022900//GO:0042773//GO:0006139//GO:0006091//GO:…	small molecule metabolic process//oxidation-reduction process//ATP metabolic process//organonitrogen compound metabolic process//purine-containing compound metabolic process//nucleobase-containing small molecule metabolic process//nucleoside triphosphate metabolic process//nitrogen compound metabolic process//nucleoside phosphate metabolic process//cellular process//ribonucleotide metabolic proce…	GO:1902494//GO:0019866//GO:0044464//GO:0016020//GO:0098798//GO:0044446//GO:0005746//GO:1990351//GO:1990204//GO:0044424//GO:0098800//GO:0044422//GO:0044429//GO:0031090//GO:0043234//GO:0005740//GO:0016021//GO:0043226//GO:0005623//GO:0045275//GO:0005737//GO:0031966//GO:0031224//GO:1902495//GO:0005743//GO:0070469//GO:0044455//GO:0098796//GO:0043229//GO:0005739//GO:0044444//GO:0031975//GO:0044425//GO:…	catalytic complex//organelle inner membrane//cell part//membrane//mitochondrial protein complex//intracellular organelle part//mitochondrial respiratory chain//transporter complex//oxidoreductase complex//intracellular part//inner mitochondrial membrane protein complex//organelle part//mitochondrial part//organelle membrane//protein complex//mitochondrial envelope//integral component of membrane/…	--
AAEL000183	supercont1.3	+	1332510	1357769	757	0	12	6	3	20	0	0	3	8	0	0.830018	0.43364	0.250299	1.18574	0	0	0.202027	0.503557	0.421219	0.47868	0.235195	6.51752	5.92005	0.13871	0.92675	1	FALSE	6.99244	3.28757	1.0888	0.54397	0.96766	FALSE	3.13845	6.00443	-0.93598	0.52618	1	FALSE	--	--	--	--	--
AAEL000184	supercont1.3	+	4745959	4753821	1677	78	65	71	75	96	63	85	82	122	2.34477	2.02947	2.31632	2.82463	2.56918	1.66191	2.58838	2.49267	3.46642	2.23019	2.3519	2.84916	73.3082	76.1913	-0.055652	0.99528	1	FALSE	78.5841	91.8381	-0.22485	0.54525	0.96782	FALSE	87.6504	77.5117	0.17735	0.57147	1	FALSE	GO:0006508//GO:0071704//GO:0019538//GO:0008152//GO:0043170//GO:0044238//GO:0008150	proteolysis//organic substance metabolic process//protein metabolic process//metabolic process//macromolecule metabolic process//primary metabolic process//biological_process	GO:0031224//GO:0005575//GO:0016021//GO:0044425//GO:0016020	intrinsic component of membrane//cellular_component//integral component of membrane//membrane part//membrane	GO:0003674//GO:0005524//GO:0097367//GO:0005488//GO:0008233//GO:0032553//GO:0016787//GO:0036094//GO:0035639//GO:1901265//GO:0017076//GO:0097159//GO:0032550//GO:1901363//GO:0003824//GO:0032555//GO:0032559//GO:0001882//GO:0001883//GO:0043167//GO:0032549//GO:0000166//GO:0043168//GO:0030554
AAEL000185	supercont1.3	-	4872924	4909278	3206	4255	4638	2948	4418	5197	5553	3762	3824	5084	66.9076	75.7477	50.3081	87.0353	72.752	76.6237	59.9236	60.8049	75.5608	64.3211	78.8036	65.4298	4781.64	4078.18	0.22958	0.38942	1	FALSE	5123.43	4055.98	0.33706	0.18491	0.6683	FALSE	3870.91	4143.07	-0.09803	0.71149	1	FALSE	GO:0043604//GO:0043170//GO:0044238//GO:0009058//GO:0008152//GO:0009059//GO:0044249//GO:0043603//GO:0009987//GO:0008150//GO:0006807//GO:0010467//GO:0044267//GO:0043043//GO:1901564//GO:0044237//GO:0044260//GO:0044271//GO:0006413//GO:1901566//GO:0019538//GO:1901576//GO:0034641//GO:0006412//GO:0034645//GO:0071704//GO:0006518	amide biosynthetic process//macromolecule metabolic process//primary metabolic process//biosynthetic process//metabolic process//macromolecule biosynthetic process//cellular biosynthetic process//cellular amide metabolic process//cellular process//biological_process//nitrogen compound metabolic process//gene expression//cellular protein metabolic process//peptide biosynthetic process//organonitro…	--	--	GO:0097159//GO:0003743//GO:1901363//GO:0003676//GO:0003723//GO:0008135//GO:0005515//GO:0005488//GO:0003674
AAEL000186	supercont1.3	+	5114979	5116227	1190	422	464	478	354	407	366	438	457	627	17.8774	20.4161	21.9763	18.7884	15.3498	13.6061	18.7962	19.5773	25.1059	20.0899	15.9148	21.1598	355.39	483.444	-0.44395	0.15508	0.87413	FALSE	380.875	486.113	-0.35198	0.19648	0.68325	FALSE	463.936	491.758	-0.084021	0.89339	1	FALSE	--	--	--	--	--
AAEL000187	supercont1.3	-	3456204	3498002	4611	11	44	25	16	27	40	52	27	56	0.120264	0.499643	0.296632	0.219158	0.262799	0.383764	0.575905	0.298506	0.578692	0.305513	0.288574	0.484368	25.8848	26.9107	-0.056073	0.91178	1	FALSE	27.7163	42.2732	-0.60901	0.21943	0.71404	FALSE	40.3484	27.3174	0.56269	0.31398	1	FALSE	GO:0019538//GO:0006793//GO:0071704//GO:0006464//GO:0051704//GO:0044237//GO:0044260//GO:0043412//GO:0006796//GO:0009405//GO:0008150//GO:0009987//GO:0016310//GO:0044267//GO:0044238//GO:0043170//GO:0036211//GO:0006468//GO:0008152	protein metabolic process//phosphorus metabolic process//organic substance metabolic process//cellular protein modification process//multi-organism process//cellular metabolic process//cellular macromolecule metabolic process//macromolecule modification//phosphate-containing compound metabolic process//pathogenesis//biological_process//cellular process//phosphorylation//cellular protein metabolic…	GO:0005575//GO:0016020//GO:0005576	cellular_component//membrane//extracellular region	GO:0017076//GO:1901265//GO:0016772//GO:0032553//GO:0035639//GO:0036094//GO:0005515//GO:0016740//GO:0005524//GO:0097367//GO:0046914//GO:0005488//GO:0008270//GO:0003674//GO:0043168//GO:0000166//GO:0030554//GO:0043167//GO:0046872//GO:0032549//GO:0016301//GO:0043169//GO:0032555//GO:0032559//GO:0003824//GO:0001883//GO:0004672//GO:0001882//GO:0032550//GO:0097159//GO:0016773//GO:1901363
AAEL000188	supercont1.3	-	1095376	1117020	1800	0	1	1	1	2	0	1	0	0	0	0.0290891	0.0303949	0.0350882	0.049867	0	0.0283707	0	0	0.019828	0.0283184	0.00945691	0.904974	0.703014	0.36432	1	1	FALSE	0.97126	0.325793	1.5759	0.84057	1	FALSE	0.310919	0.715081	-1.2016	0.965	1	FALSE	--	--	GO:0044425//GO:0016020//GO:0005575//GO:0031224//GO:0016021	membrane part//membrane//cellular_component//intrinsic component of membrane//integral component of membrane	--
AAEL000190	supercont1.3	+	3663772	3666719	825	0	0	0	0	0	0	0	0	0	0	0	0	0	0	0	0	0	0	0	0	0	0	0	NA	NA	NA	NA	0	0	NA	NA	NA	NA	0	0	NA	NA	NA	NA	GO:0071704//GO:0050789//GO:0007165//GO:0019538//GO:0050794//GO:0044763//GO:0007154//GO:0048583//GO:0051716//GO:0006508//GO:0044700//GO:0010646//GO:0008150//GO:0009987//GO:0065007//GO:0009966//GO:0023051//GO:0050896//GO:0008152//GO:0044699//GO:0023052//GO:0044238//GO:0043170	organic substance metabolic process//regulation of biological process//signal transduction//protein metabolic process//regulation of cellular process//single-organism cellular process//cell communication//regulation of response to stimulus//cellular response to stimulus//proteolysis//single organism signaling//regulation of cell communication//biological_process//cellular process//biological regu…	GO:0005575//GO:0005576	cellular_component//extracellular region	GO:0008233//GO:0016787//GO:0004175//GO:0003674//GO:0070011//GO:0004252//GO:0017171//GO:0003824//GO:0008236
AAEL000191	supercont1.3	+	4820431	4851894	3106	5005	4034	3754	3824	4312	5165	4726	5433	6028	81.2348	68.0043	66.1251	77.7588	62.3065	73.5644	77.7025	89.1708	92.4754	71.7881	71.2099	86.4496	4202.58	4513.87	-0.10309	0.74823	1	FALSE	4502.54	5243.02	-0.21966	0.40449	0.89035	FALSE	5003.53	4590.26	0.12437	0.62016	1	FALSE	--	--	GO:0005575//GO:0044425//GO:0031224//GO:0016020//GO:0016021	cellular_component//membrane part//intrinsic component of membrane//membrane//integral component of membrane	--
AAEL000192	supercont1.3	-	4059752	4074971	483	0	0	0	2	0	0	0	0	0	0	0	0	0.261527	0	0	0	0	0	0	0.0871755	0	0.723494	0	Inf	0.87469	1	FALSE	0.777189	0	Inf	0.79807	1	FALSE	0	0	NA	NA	NA	NA	GO:0051817//GO:0065008//GO:0009987//GO:0008150//GO:0016032//GO:0065007//GO:0044003//GO:0051701//GO:0044403//GO:0019048//GO:0051704//GO:0044419//GO:0035821//GO:0044764	modification of morphology or physiology of other organism involved in symbiotic interaction//regulation of biological quality//cellular process//biological_process//viral process//biological regulation//modification by symbiont of host morphology or physiology//interaction with host//symbiosis, encompassing mutualism through parasitism//modulation by virus of host morphology or physiology//multi…	GO:0005634//GO:0043229//GO:0019031//GO:0044424//GO:0036338//GO:0044464//GO:0019012//GO:0005575//GO:0005622//GO:0044423//GO:0005623//GO:0043226//GO:0043231//GO:0043227	nucleus//intracellular organelle//viral envelope//intracellular part//viral membrane//cell part//virion//cellular_component//intracellular//virion part//cell//organelle//intracellular membrane-bounded organelle//membrane-bounded organelle	GO:0043169//GO:0043167//GO:0046872//GO:0046914//GO:0005488//GO:0008270//GO:0003674
AAEL000193	supercont1.3	-	1900715	1954873	4214	311	695	184	358	463	282	568	393	856	3.72053	8.6356	2.38889	5.36564	4.93108	2.96042	6.8833	4.75426	9.67907	4.91501	4.41905	7.10554	345.244	385.864	-0.16047	0.58017	1	FALSE	370.115	564.648	-0.60938	0.01979	0.19212	FALSE	538.953	391.001	0.46299	0.30969	1	FALSE	--	--	--	--	GO:0005515//GO:0005488//GO:0003674
AAEL000194	supercont1.3	-	3540575	3578864	6466	1430	1329	1224	1471	2088	1958	1290	1329	1402	11.156	10.7686	10.3631	14.3773	14.5017	13.4043	10.1945	10.4844	10.338	10.7626	14.0945	10.3389	1724.02	1403.23	0.29703	0.20398	0.97035	FALSE	1847.25	1306.87	0.49927	0.03949	0.29843	FALSE	1247.16	1426.93	-0.19427	0.52311	1	FALSE	--	--	--	--	GO:0016772//GO:0016747//GO:0003674//GO:0016746//GO:0016740//GO:0016773//GO:0003824
AAEL000195	supercont1.3	-	1717489	1748209	2784	0	1	2	2	0	0	1	1	0	0	0.0188076	0.0393038	0.0453726	0	0	0.0183431	0.0183111	0	0.0193705	0.0151242	0.0122181	0.723494	1.12237	-0.63349	0.97055	1	FALSE	0.777189	0.712284	0.12581	1	1	FALSE	0.679496	1.1445	-0.75218	0.95232	1	FALSE	--	--	GO:0019012//GO:0005575//GO:0044423//GO:0036338//GO:0019031	virion//cellular_component//virion part//viral membrane//viral envelope	GO:0005515//GO:0005488//GO:0003674
AAEL000196	supercont1.3	+	4856827	4866508	1447	16	35	20	37	66	15	8	6	10	0.557431	1.26649	0.756197	1.61498	2.04706	0.458587	0.282335	0.211382	0.329296	0.860039	1.37354	0.274337	36.0974	24.0545	0.58559	0.34367	1	FALSE	38.7183	7.58541	2.3517	0.0056837	0.079021	FALSE	7.23971	24.4234	-1.7543	0.019822	0.3579	FALSE	GO:0008150//GO:0008152	biological_process//metabolic process	--	--	GO:0016787//GO:0003674//GO:0016791//GO:0016788//GO:0042578//GO:0003824
AAEL000199	supercont1.3	-	2022352	2035355	2360	226	373	208	375	524	373	363	213	539	4.82765	8.27559	4.82198	10.0358	9.96495	6.99191	7.85484	4.601	10.8826	5.97507	8.99755	7.77947	396.999	274.099	0.53444	0.085333	0.65686	FALSE	425.507	343.966	0.30692	0.3444	0.84443	FALSE	328.325	278.317	0.2384	0.41809	1	FALSE	GO:0010467//GO:0016192//GO:0006260//GO:0006139//GO:0051234//GO:0043603//GO:0008150//GO:0009059//GO:0043436//GO:0008152//GO:0022406//GO:0006887//GO:0006418//GO:0032940//GO:0015031//GO:0043170//GO:0044238//GO:0008104//GO:0044699//GO:0034645//GO:0071704//GO:0043039//GO:0034660//GO:0019752//GO:1901566//GO:0051641//GO:0044765//GO:0006082//GO:0044237//GO:0044281//GO:0043043//GO:0006810//GO:1901564//GO:…	gene expression//vesicle-mediated transport//DNA replication//nucleobase-containing compound metabolic process//establishment of localization//cellular amide metabolic process//biological_process//macromolecule biosynthetic process//oxoacid metabolic process//metabolic process//membrane docking//exocytosis//tRNA aminoacylation for protein translation//secretion by cell//protein transport//macromo…	GO:0005938//GO:0044444//GO:0000145//GO:0005622//GO:0032991//GO:0044448//GO:0005575//GO:0044464//GO:0044424//GO:0043234//GO:0005623//GO:0071944//GO:0005737	cell cortex//cytoplasmic part//exocyst//intracellular//macromolecular complex//cell cortex part//cellular_component//cell part//intracellular part//protein complex//cell//cell periphery//cytoplasm	GO:0043167//GO:0000166//GO:0043168//GO:1901363//GO:0004814//GO:0001883//GO:0032559//GO:0032555//GO:0035639//GO:0032553//GO:1901265//GO:0016874//GO:0003674//GO:0016876//GO:0005524//GO:0097367//GO:0032549//GO:0030554//GO:0097159//GO:0032550//GO:0016875//GO:0001882//GO:0003824//GO:0036094//GO:0017076//GO:0005488//GO:0004812
AAEL000200	supercont1.3	-	4498646	4499222	445	33	76	83	69	297	135	57	1	45	3.73846	8.94243	10.2045	9.79314	29.9538	13.4206	6.54121	0.114558	4.81845	7.62847	17.7225	3.82474	148.706	68.2019	1.1246	0.093716	0.69076	FALSE	159.349	30.9273	2.3652	0.0095883	0.1152	FALSE	29.525	69.3907	-1.2328	0.16132	0.97881	FALSE	GO:0008645//GO:0044765//GO:0010827//GO:0032879//GO:0015749//GO:0010829//GO:0051049//GO:0008643//GO:0051051//GO:0050789//GO:0071702//GO:0044699//GO:0046325//GO:0046323//GO:0051179//GO:0065007//GO:0015758//GO:0051234//GO:1902578//GO:0008150//GO:0046324//GO:0048519//GO:0006810	hexose transport//single-organism transport//regulation of glucose transport//regulation of localization//monosaccharide transport//negative regulation of glucose transport//regulation of transport//carbohydrate transport//negative regulation of transport//regulation of biological process//organic substance transport//single-organism process//negative regulation of glucose import//glucose import/…	--	--	--
AAEL000201	supercont1.3	+	1786781	1847518	3345	16	89	16	38	67	21	67	44	115	0.241137	1.39314	0.261696	0.717498	0.898948	0.277729	1.02287	0.670565	1.63816	0.631992	0.631392	1.11053	38.6452	37.6948	0.035925	0.92611	1	FALSE	41.4431	69.4251	-0.74433	0.075753	0.43089	FALSE	66.2693	38.1312	0.79737	0.28431	1	FALSE	--	--	--	--	GO:0003824//GO:0032555//GO:0032559//GO:0001882//GO:0001883//GO:0097159//GO:0032550//GO:1901363//GO:0000166//GO:0043168//GO:0030554//GO:0043167//GO:0032549//GO:0097367//GO:0005524//GO:0005488//GO:0003674//GO:1901265//GO:0017076//GO:0032553//GO:0036094//GO:0016787//GO:0035639
AAEL000203	supercont1.3	+	3676215	3681861	711	0	0	0	0	0	0	0	0	0	0	0	0	0	0	0	0	0	0	0	0	0	0	0	NA	NA	NA	NA	0	0	NA	NA	NA	NA	0	0	NA	NA	NA	NA	GO:0008150//GO:0008152//GO:0043170//GO:0044238//GO:0071704//GO:0019538//GO:0006508	biological_process//metabolic process//macromolecule metabolic process//primary metabolic process//organic substance metabolic process//protein metabolic process//proteolysis	--	--	GO:0017171//GO:0008233//GO:0004175//GO:0003674//GO:0003824//GO:0008236//GO:0016787//GO:0070011//GO:0004252
AAEL000204	supercont1.3	-	4921536	4946805	1719	2084	1774	1604	1659	2068	2051	1709	2074	2258	62.2024	54.9954	51.9575	62.0369	54.9511	53.7199	51.672	62.5984	63.7014	56.3851	56.9026	59.3239	1816.27	1923.41	-0.082681	0.82672	1	FALSE	1946.17	1959.02	-0.0094887	0.97065	1	FALSE	1869.52	1955.81	-0.065095	0.8519	1	FALSE	GO:1902589//GO:0007049//GO:0044763//GO:0034453//GO:0007017//GO:0006996//GO:0008608//GO:0000226//GO:0044699//GO:0022402//GO:0016043//GO:0098813//GO:0071840//GO:0007059//GO:0007010//GO:0008150//GO:0009987	single-organism organelle organization//cell cycle//single-organism cellular process//microtubule anchoring//microtubule-based process//organelle organization//attachment of spindle microtubules to kinetochore//microtubule cytoskeleton organization//single-organism process//cell cycle process//cellular component organization//nuclear chromosome segregation//cellular component organization or biog…	GO:0031974//GO:0005622//GO:0000940//GO:0000780//GO:0044454//GO:0032991//GO:0005876//GO:0005575//GO:0000942//GO:0044430//GO:0043228//GO:0043227//GO:0043232//GO:0000777//GO:0043231//GO:0043226//GO:0031981//GO:0005623//GO:0070013//GO:0000228//GO:0000775//GO:0005694//GO:0005856//GO:0000778//GO:0044427//GO:0043229//GO:0005634//GO:0000779//GO:0044422//GO:0005874//GO:0000793//GO:0043234//GO:0044464//GO:…	membrane-enclosed lumen//intracellular//condensed chromosome outer kinetochore//condensed nuclear chromosome, centromeric region//nuclear chromosome part//macromolecular complex//spindle microtubule//cellular_component//condensed nuclear chromosome outer kinetochore//cytoskeletal part//non-membrane-bounded organelle//membrane-bounded organelle//intracellular non-membrane-bounded organelle//conden…	--
AAEL000206	supercont1.3	-	2112343	2117688	567	1107	874	808	829	920	957	720	729	811	98.4247	80.7106	77.9654	92.3431	72.8216	74.6668	64.8474	65.5434	68.1541	85.7002	79.9439	66.1816	855.135	983.847	-0.20228	0.50042	1	FALSE	916.335	732.058	0.32392	0.20755	0.69983	FALSE	698.621	1000.48	-0.51811	0.088945	0.79763	FALSE	GO:0032502//GO:0009888//GO:0031099//GO:0042060//GO:0042246//GO:0044767//GO:0048856//GO:0022610//GO:0048589//GO:0044699//GO:0006950//GO:0050896//GO:0008150//GO:0009611//GO:0007155//GO:0040007	developmental process//tissue development//regeneration//wound healing//tissue regeneration//single-organism developmental process//anatomical structure development//biological adhesion//developmental growth//single-organism process//response to stress//response to stimulus//biological_process//response to wounding//cell adhesion//growth	GO:0031224//GO:0005575//GO:0016021//GO:0044425//GO:0016020	intrinsic component of membrane//cellular_component//integral component of membrane//membrane part//membrane	--
AAEL000208	supercont1.3	+	1992122	1993172	848	891	806	715	907	1481	1132	1185	823	1211	52.9689	49.767	46.13	67.553	78.3817	59.054	71.3617	49.4753	68.046	49.622	68.3296	62.961	1091.57	848.077	0.36413	0.12951	0.80814	FALSE	1169.73	1026.29	0.18874	0.43368	0.90716	FALSE	979.48	862.321	0.18379	0.46415	1	FALSE	GO:0008150//GO:0051234//GO:0006810//GO:0051179	biological_process//establishment of localization//transport//localization	GO:0016020//GO:0044425//GO:0016021//GO:0005575//GO:0031224	membrane//membrane part//integral component of membrane//cellular_component//intrinsic component of membrane	--
AAEL000209	supercont1.3	-	4287325	4288340	390	0	0	0	1	0	0	0	0	0	0	0	0	0.161945	0	0	0	0	0	0	0.0539818	0	0.361747	0	Inf	1	1	FALSE	0.388595	0	Inf	0.99812	1	FALSE	0	0	NA	NA	NA	NA	GO:0050896//GO:0002376//GO:0006955//GO:0008150	response to stimulus//immune system process//immune response//biological_process	--	--	GO:0003674//GO:0060089//GO:0005488//GO:0030247//GO:0004872//GO:0030246//GO:0005044//GO:0001871//GO:0038024
AAEL000210	supercont1.3	-	5101985	5108578	1106	177	250	161	152	268	203	233	195	299	8.06784	11.8355	7.96424	8.68003	10.8752	8.1197	10.7583	8.98802	12.8816	9.2892	9.22496	10.876	192.552	201.922	-0.068555	0.86749	1	FALSE	206.33	230.813	-0.16177	0.63064	1	FALSE	220.289	205.122	0.10292	0.76281	1	FALSE	GO:0006807//GO:0008150//GO:0043603//GO:0009987//GO:1901564//GO:0043043//GO:0044267//GO:0010467//GO:0044238//GO:0043604//GO:0043170//GO:0044249//GO:0009059//GO:0008152//GO:0009058//GO:1901576//GO:0034641//GO:0019538//GO:0071704//GO:0006518//GO:0034645//GO:0006412//GO:0044260//GO:0044237//GO:1901566//GO:0044271	nitrogen compound metabolic process//biological_process//cellular amide metabolic process//cellular process//organonitrogen compound metabolic process//peptide biosynthetic process//cellular protein metabolic process//gene expression//primary metabolic process//amide biosynthetic process//macromolecule metabolic process//cellular biosynthetic process//macromolecule biosynthetic process//metabolic…	GO:0044424//GO:0044464//GO:0044444//GO:0030529//GO:0043229//GO:0005623//GO:1990904//GO:0005840//GO:0043232//GO:0043226//GO:0032991//GO:0005575//GO:0043228//GO:0005737//GO:0005622	intracellular part//cell part//cytoplasmic part//intracellular ribonucleoprotein complex//intracellular organelle//cell//ribonucleoprotein complex//ribosome//intracellular non-membrane-bounded organelle//organelle//macromolecular complex//cellular_component//non-membrane-bounded organelle//cytoplasm//intracellular	GO:0005198//GO:0003735//GO:0003674
AAEL000211	supercont1.3	-	1885602	1887542	1792	51	60	78	45	115	61	52	34	106	1.43473	1.75313	2.38139	1.58602	2.88015	1.50588	1.48186	0.96722	2.81853	1.85642	1.99068	1.75587	66.9782	68.0233	-0.022337	0.85773	1	FALSE	71.78	58.2792	0.3006	0.54127	0.96616	FALSE	55.6329	69.2396	-0.31566	0.71917	1	FALSE	--	--	--	--	GO:0005515//GO:0005488//GO:0003674
AAEL000213	supercont1.3	-	784052	818588	1315	72	96	86	79	215	49	150	48	77	2.76024	3.8225	3.57805	3.79432	7.33784	1.64842	5.82517	1.8608	2.7901	3.38693	4.2602	3.49202	102.61	89.1228	0.2033	0.63433	1	FALSE	110.036	87.9035	0.32398	0.60396	0.99614	FALSE	83.8944	90.6196	-0.11125	0.87231	1	FALSE	GO:0044237//GO:0016070//GO:0044260//GO:0008033//GO:0071704//GO:0034660//GO:0034470//GO:0006396//GO:0034641//GO:0090304//GO:0044710//GO:1901360//GO:0008152//GO:0006399//GO:0006725//GO:0044699//GO:0043170//GO:0044238//GO:0010467//GO:0055114//GO:0009987//GO:0046483//GO:0008150//GO:0006807//GO:0006139	cellular metabolic process//RNA metabolic process//cellular macromolecule metabolic process//tRNA processing//organic substance metabolic process//ncRNA metabolic process//ncRNA processing//RNA processing//cellular nitrogen compound metabolic process//nucleic acid metabolic process//single-organism metabolic process//organic cyclic compound metabolic process//metabolic process//tRNA metabolic pro…	--	--	GO:0048037//GO:0003674//GO:0050662//GO:0005488//GO:0016491//GO:0036094//GO:1901265//GO:0097159//GO:1901363//GO:0003824//GO:0043167//GO:0000166//GO:0043168//GO:0050660
AAEL000214	supercont1.3	+	1223434	1228162	1936	145	218	160	192	228	227	221	200	274	3.77574	5.89594	4.52156	6.26367	5.28549	5.18704	5.82948	5.26634	6.74372	4.73108	5.57873	5.94652	203.815	180.947	0.17169	0.61626	1	FALSE	218.4	222.186	-0.024793	0.9294	1	FALSE	212.049	183.878	0.20565	0.54084	1	FALSE	GO:0048278//GO:0044763//GO:0051641//GO:0044765//GO:0006810//GO:0016192//GO:1902578//GO:0051234//GO:0008150//GO:0009987//GO:0022406//GO:0032940//GO:0051179//GO:0006887//GO:0006904//GO:0046903//GO:0051649//GO:0044699	vesicle docking//single-organism cellular process//cellular localization//single-organism transport//transport//vesicle-mediated transport//single-organism localization//establishment of localization//biological_process//cellular process//membrane docking//secretion by cell//localization//exocytosis//vesicle docking involved in exocytosis//secretion//establishment of localization in cell//single-…	--	--	--
AAEL000215	supercont1.3	+	2051229	2055542	1238	35	32	24	35	70	39	41	16	81	1.42524	1.35342	1.06063	1.78558	2.53766	1.39361	1.69124	0.658846	3.11759	1.27976	1.90562	1.82256	44.1183	31.6964	0.47706	0.35642	1	FALSE	47.286	41.0883	0.20269	0.79448	1	FALSE	39.2262	32.2154	0.28406	0.4836	1	FALSE	GO:1901360//GO:0008152//GO:0006725//GO:0006399//GO:0044238//GO:0043170//GO:0044085//GO:0010467//GO:0016072//GO:0008150//GO:0016071//GO:0009987//GO:0046483//GO:0071840//GO:0006139//GO:0006807//GO:0090501//GO:0042254//GO:0016070//GO:0044237//GO:0090305//GO:0044260//GO:0022613//GO:0006364//GO:0071704//GO:0008033//GO:0034470//GO:0034660//GO:0006379//GO:0034641//GO:0006396//GO:0090304	organic cyclic compound metabolic process//metabolic process//cellular aromatic compound metabolic process//tRNA metabolic process//primary metabolic process//macromolecule metabolic process//cellular component biogenesis//gene expression//rRNA metabolic process//biological_process//mRNA metabolic process//cellular process//heterocycle metabolic process//cellular component organization or biogene…	GO:0030677//GO:0030529//GO:0043234//GO:1902494//GO:0044464//GO:0044424//GO:0005622//GO:0005732//GO:1902555//GO:0005575//GO:0032991//GO:0000172//GO:0005623//GO:1990904	ribonuclease P complex//intracellular ribonucleoprotein complex//protein complex//catalytic complex//cell part//intracellular part//intracellular//small nucleolar ribonucleoprotein complex//endoribonuclease complex//cellular_component//macromolecular complex//ribonuclease MRP complex//cell//ribonucleoprotein complex	GO:0032550//GO:0097159//GO:0003676//GO:1901363//GO:0016462//GO:0032555//GO:0032559//GO:0003824//GO:0001883//GO:0004518//GO:0001882//GO:0043167//GO:0016788//GO:0032549//GO:0043168//GO:0000166//GO:0017111//GO:0016887//GO:0003723//GO:0030554//GO:0003674//GO:0004540//GO:0097367//GO:0005524//GO:0005488//GO:0016818//GO:0032553//GO:0016787//GO:0036094//GO:0035639//GO:0016817//GO:0017076//GO:1901265
AAEL000216	supercont1.3	-	1137149	1140593	2088	0	0	0	0	0	0	0	0	1	0	0	0	0	0	0	0	0	0.0228204	0	0	0.00760681	0	0	NA	NA	NA	NA	0	0.266012	#NAME?	1	1	FALSE	0.254089	0	Inf	1	1	FALSE	--	--	GO:0016021//GO:0031224//GO:0005575//GO:0016020//GO:0044425	integral component of membrane//intrinsic component of membrane//cellular_component//membrane//membrane part	--
AAEL000217	supercont1.3	-	1254055	1295642	5596	513	937	406	615	858	678	695	479	881	4.62146	8.76726	3.96937	6.94113	6.88122	5.35983	6.34235	4.36357	7.50158	5.78603	6.39406	6.06917	671.857	620.065	0.11573	0.79783	1	FALSE	720.024	645.912	0.15671	0.59824	0.99347	FALSE	616.49	629.153	-0.029333	0.84169	1	FALSE	GO:0006796//GO:0043412//GO:0044260//GO:0044237//GO:0006464//GO:0071704//GO:0006793//GO:0019538//GO:0008152//GO:0006468//GO:0036211//GO:0043170//GO:0044238//GO:0044267//GO:0009987//GO:0016310//GO:0008150	phosphate-containing compound metabolic process//macromolecule modification//cellular macromolecule metabolic process//cellular metabolic process//cellular protein modification process//organic substance metabolic process//phosphorus metabolic process//protein metabolic process//metabolic process//protein phosphorylation//protein modification process//macromolecule metabolic process//primary meta…	--	--	GO:0003674//GO:0005488//GO:0097367//GO:0005524//GO:0016740//GO:0035639//GO:0036094//GO:0032553//GO:0016772//GO:1901265//GO:0017076//GO:1901363//GO:0016773//GO:0097159//GO:0032550//GO:0001882//GO:0004672//GO:0001883//GO:0003824//GO:0032559//GO:0032555//GO:0016301//GO:0032549//GO:0043167//GO:0030554//GO:0000166//GO:0043168
AAEL000218	supercont1.4	+	1585892	1586245	300	0	0	0	0	0	0	0	0	0	0	0	0	0	0	0	0	0	0	0	0	0	0	0	NA	NA	NA	NA	0	0	NA	NA	NA	NA	0	0	NA	NA	NA	NA	--	--	--	--	--
AAEL000219	supercont1.4	-	2849485	2851870	2156	29	55	45	50	56	58	46	50	51	0.678092	1.33572	1.14192	1.46472	1.16572	1.19009	1.08956	1.18224	1.12713	1.05191	1.27351	1.13298	51.8045	44.8748	0.20717	0.69294	1	FALSE	55.5119	47.8776	0.21344	0.60745	0.99813	FALSE	45.6897	45.6146	0.002373	0.99757	1	FALSE	GO:0009058//GO:0044710//GO:0044267//GO:0043412//GO:0036211//GO:0009059//GO:0006464//GO:0034645//GO:0043413//GO:0008152//GO:1901137//GO:0071704//GO:1901135//GO:0044249//GO:0009101//GO:0006486//GO:0044723//GO:0044237//GO:0009987//GO:0005975//GO:0019538//GO:0009100//GO:0008150//GO:0044699//GO:1901576//GO:0043170//GO:0044260//GO:0044238//GO:0070085//GO:0044763	biosynthetic process//single-organism metabolic process//cellular protein metabolic process//macromolecule modification//protein modification process//macromolecule biosynthetic process//cellular protein modification process//cellular macromolecule biosynthetic process//macromolecule glycosylation//metabolic process//carbohydrate derivative biosynthetic process//organic substance metabolic proces…	GO:0016020//GO:0005576//GO:0005575	membrane//extracellular region//cellular_component	GO:0008417//GO:0005184//GO:0003674//GO:0005102//GO:0005179//GO:0016758//GO:0003824//GO:0016740//GO:0005515//GO:0016757//GO:0005185//GO:0005488
AAEL000221	supercont1.4	-	4566031	4575632	1257	622	515	534	440	484	649	694	770	913	24.9456	21.4523	23.2423	22.108	17.2809	22.8406	28.1947	31.2277	34.6091	23.2134	20.7432	31.3438	497.714	593.137	-0.25305	0.42552	1	FALSE	533.178	766.567	-0.52379	0.052309	0.35103	FALSE	731.566	603.336	0.27803	0.30101	1	FALSE	GO:0019222//GO:0019438//GO:0090304//GO:0034641//GO:1901576//GO:0060255//GO:0006366//GO:0031326//GO:0016070//GO:1901362//GO:0044260//GO:0044271//GO:2001141//GO:0080090//GO:0046483//GO:0009987//GO:0065007//GO:0006807//GO:0006357//GO:0006351//GO:0032774//GO:0051252//GO:0006725//GO:1901360//GO:0009058//GO:1903506//GO:0044249//GO:0009889//GO:0050794//GO:0097659//GO:0031323//GO:0071704//GO:0051171//GO:…	regulation of metabolic process//aromatic compound biosynthetic process//nucleic acid metabolic process//cellular nitrogen compound metabolic process//organic substance biosynthetic process//regulation of macromolecule metabolic process//transcription from RNA polymerase II promoter//regulation of cellular biosynthetic process//RNA metabolic process//organic cyclic compound biosynthetic process//…	GO:0044451//GO:0005623//GO:0043226//GO:0016592//GO:0031974//GO:0044424//GO:0044446//GO:0044464//GO:0043234//GO:0044422//GO:0070013//GO:0043231//GO:0031981//GO:0043227//GO:0005575//GO:0005654//GO:0032991//GO:0005622//GO:0044428//GO:0043233//GO:0043229//GO:0005634	nucleoplasm part//cell//organelle//mediator complex//membrane-enclosed lumen//intracellular part//intracellular organelle part//cell part//protein complex//organelle part//intracellular organelle lumen//intracellular membrane-bounded organelle//nuclear lumen//membrane-bounded organelle//cellular_component//nucleoplasm//macromolecular complex//intracellular//nuclear part//organelle lumen//intracel…	GO:0003712//GO:0001071//GO:0000989//GO:0003674//GO:0003700//GO:0001104//GO:0000988//GO:0001076
AAEL000222	supercont1.4	+	4507251	4511980	678	90	133	89	118	123	128	119	115	172	6.69194	10.2713	7.18181	10.9922	8.142	8.35178	8.96314	8.64674	12.088	8.04834	9.162	9.89928	116.937	107.333	0.12364	0.79367	1	FALSE	125.313	128.97	-0.041499	0.85855	1	FALSE	123.089	109.044	0.1748	0.64128	1	FALSE	--	--	--	--	GO:0016787//GO:0070011//GO:0008238//GO:0008242//GO:0003824//GO:0008233//GO:0003674
AAEL000223	supercont1.4	+	3845501	3847558	1993	16546	17093	17764	13386	19494	16146	10968	8118	8133	418.529	449.069	487.649	424.206	438.985	358.39	281.037	207.647	194.446	451.749	407.194	227.71	15289.1	18233.2	-0.25406	0.41	1	FALSE	16383.8	8874.3	0.88457	0.00024722	0.0065501	UP	8468.78	18547.1	-1.131	0.00014571	0.010366	DOWN	GO:0071704//GO:0044238//GO:0008152//GO:0008150//GO:0005975	organic substance metabolic process//primary metabolic process//metabolic process//biological_process//carbohydrate metabolic process	--	--	GO:0003674//GO:0004553//GO:0016798//GO:0016787//GO:0003824
AAEL000224	supercont1.4	+	420986	442391	1113	0	0	0	0	0	0	0	0	0	0	0	0	0	0	0	0	0	0	0	0	0	0	0	NA	NA	NA	NA	0	0	NA	NA	NA	NA	0	0	NA	NA	NA	NA	GO:0008150//GO:0044238//GO:0043170//GO:0008152//GO:0019538//GO:0071704//GO:0006508	biological_process//primary metabolic process//macromolecule metabolic process//metabolic process//protein metabolic process//organic substance metabolic process//proteolysis	--	--	GO:0017171//GO:0003824//GO:0008236//GO:0004197//GO:0008233//GO:0016787//GO:0004175//GO:0008234//GO:0004252//GO:0003674//GO:0070011
AAEL000225	supercont1.4	-	912494	915986	2911	0	0	0	0	0	0	0	0	0	0	0	0	0	0	0	0	0	0	0	0	0	0	0	NA	NA	NA	NA	0	0	NA	NA	NA	NA	0	0	NA	NA	NA	NA	GO:0071704//GO:0044238//GO:0043170//GO:0008152//GO:0008150//GO:0006508//GO:0019538	organic substance metabolic process//primary metabolic process//macromolecule metabolic process//metabolic process//biological_process//proteolysis//protein metabolic process	--	--	GO:0003674//GO:0008233//GO:0004175//GO:0017171//GO:0004252//GO:0070011//GO:0016787//GO:0003824//GO:0008236
AAEL000226	supercont1.4	-	4650523	4655912	1341	128	203	148	144	211	154	197	133	302	4.81194	7.92628	6.03819	6.78214	7.0617	5.08032	7.50206	5.056	10.7308	6.2588	6.30805	7.76296	158.541	165.562	-0.062518	0.88598	1	FALSE	169.915	195.92	-0.20545	0.45302	0.92106	FALSE	187.007	168.238	0.15258	0.57427	1	FALSE	--	--	GO:0044464//GO:0044424//GO:0005634//GO:0043229//GO:0043227//GO:0043226//GO:0043231//GO:0005623//GO:0005622//GO:0005575	cell part//intracellular part//nucleus//intracellular organelle//membrane-bounded organelle//organelle//intracellular membrane-bounded organelle//cell//intracellular//cellular_component	GO:0042393//GO:0003674//GO:0005488//GO:0005515
AAEL000227	supercont1.4	-	4904819	4935826	1719	2208	1767	2088	1053	1349	1579	1849	1786	2015	64.7534	53.8224	66.4551	38.6888	35.2202	40.6354	54.9293	52.9651	55.8539	61.677	38.1815	54.5828	1251.16	2168.87	-0.79368	0.017758	0.25225	FALSE	1340.35	1828.68	-0.44819	0.093707	0.48104	FALSE	1745.16	2206.89	-0.33865	0.29698	1	FALSE	GO:0008152//GO:0044699//GO:0006091//GO:0007155//GO:0008150//GO:0045333//GO:0015980//GO:0044237//GO:0022904//GO:0044710//GO:0055114//GO:0009987//GO:0022900//GO:0044763//GO:0022610	metabolic process//single-organism process//generation of precursor metabolites and energy//cell adhesion//biological_process//cellular respiration//energy derivation by oxidation of organic compounds//cellular metabolic process//respiratory electron transport chain//single-organism metabolic process//oxidation-reduction process//cellular process//electron transport chain//single-organism cellula…	GO:0005575//GO:0016020	cellular_component//membrane	--
AAEL000229	supercont1.4	-	2317042	2318468	535	0	0	0	0	0	0	0	0	0	0	0	0	0	0	0	0	0	0	0	0	0	0	0	NA	NA	NA	NA	0	0	NA	NA	NA	NA	0	0	NA	NA	NA	NA	--	--	--	--	--
AAEL000230	supercont1.4	+	3897422	3898304	758	40	38	51	42	72	36	69	28	58	2.6603	2.62492	3.68107	3.49956	4.26304	2.10103	4.64861	1.8831	3.64597	2.98876	3.28787	3.39256	46.2365	46.5145	-0.0086459	0.8921	1	FALSE	49.5664	48.7302	0.024548	0.96547	1	FALSE	46.5108	47.3479	-0.025735	0.9085	1	FALSE	--	--	--	--	--
AAEL000231	supercont1.4	+	2867520	2883055	2495	303	410	210	333	413	298	324	243	460	6.12226	8.6043	4.60492	8.42959	7.42908	5.28378	6.63159	4.96501	8.785	6.44383	7.04749	6.79387	327.725	313.054	0.066075	0.90477	1	FALSE	351.286	321.84	0.12631	0.73139	1	FALSE	307.183	317.835	-0.049179	0.87302	1	FALSE	GO:0019538//GO:0006508//GO:0071704//GO:0008150//GO:0044238//GO:0043170//GO:0008152	protein metabolic process//proteolysis//organic substance metabolic process//biological_process//primary metabolic process//macromolecule metabolic process//metabolic process	--	--	GO:0016787//GO:0008237//GO:0070011//GO:0003824//GO:0008233//GO:0004175//GO:0003674//GO:0004222
AAEL000232	supercont1.4	+	4047839	4048093	255	0	0	0	0	0	0	0	0	0	0	0	0	0	0	0	0	0	0	0	0	0	0	0	NA	NA	NA	NA	0	0	NA	NA	NA	NA	0	0	NA	NA	NA	NA	--	--	--	--	--
AAEL000233	supercont1.4	-	3806124	3882754	1535	12	89	8	21	27	17	39	21	50	0.41435	3.19183	0.299786	0.908447	0.829978	0.515104	1.36413	0.733248	1.63182	1.30199	0.751176	1.24306	20.3547	32.9051	-0.69295	0.47573	1	FALSE	21.8204	34.1228	-0.64506	0.22136	0.71596	FALSE	32.5704	33.2366	-0.02921	0.84735	1	FALSE	GO:0043170//GO:0044238//GO:0008152//GO:0016071//GO:0008150//GO:0006139//GO:0010467//GO:0044237//GO:0006396//GO:0071704//GO:0006725//GO:1901360//GO:0006397//GO:0046483//GO:0009987//GO:0006807//GO:0016070//GO:0044260//GO:0090304//GO:0034641	macromolecule metabolic process//primary metabolic process//metabolic process//mRNA metabolic process//biological_process//nucleobase-containing compound metabolic process//gene expression//cellular metabolic process//RNA processing//organic substance metabolic process//cellular aromatic compound metabolic process//organic cyclic compound metabolic process//mRNA processing//heterocycle metabolic …	GO:0044425//GO:0044444//GO:0005795//GO:0005634//GO:0043229//GO:0031984//GO:0005575//GO:0005622//GO:0012505//GO:0032580//GO:0043231//GO:0043227//GO:0031090//GO:0044431//GO:0000139//GO:0044422//GO:0031985//GO:0044424//GO:0044446//GO:0098588//GO:0016020//GO:0044464//GO:0031224//GO:0005794//GO:0005737//GO:0098791//GO:0005623//GO:0016021//GO:0043226	membrane part//cytoplasmic part//Golgi stack//nucleus//intracellular organelle//organelle subcompartment//cellular_component//intracellular//endomembrane system//Golgi cisterna membrane//intracellular membrane-bounded organelle//membrane-bounded organelle//organelle membrane//Golgi apparatus part//Golgi membrane//organelle part//Golgi cisterna//intracellular part//intracellular organelle part//bo…	GO:0016758//GO:0004190//GO:0003674//GO:0008233//GO:0004175//GO:0003824//GO:0016757//GO:0008376//GO:0070001//GO:0016740//GO:0070011//GO:0008194//GO:0016787
AAEL000234	supercont1.4	-	4701327	4741400	1557	1173	1089	984	1386	1532	1480	1044	1310	1322	37.9795	36.6219	34.5764	56.2222	44.1597	42.0506	34.2417	42.8911	40.4573	36.3926	47.4775	39.1967	1389.74	1142.32	0.28285	0.25456	1	FALSE	1489.33	1198.1	0.31391	0.19911	0.68662	FALSE	1143.34	1161.55	-0.022797	0.94826	1	FALSE	GO:0071704//GO:0031326//GO:0050789//GO:0051171//GO:0044764//GO:0034645//GO:0034654//GO:0031323//GO:0060255//GO:0035821//GO:0019438//GO:0044419//GO:0097659//GO:0019222//GO:0034641//GO:1901576//GO:0090304//GO:0009889//GO:0022610//GO:0050794//GO:2001141//GO:0080090//GO:0018130//GO:0044271//GO:0044260//GO:1901362//GO:0016070//GO:0044403//GO:0019048//GO:0051704//GO:0044237//GO:0051701//GO:0032774//GO:…	organic substance metabolic process//regulation of cellular biosynthetic process//regulation of biological process//regulation of nitrogen compound metabolic process//multi-organism cellular process//cellular macromolecule biosynthetic process//nucleobase-containing compound biosynthetic process//regulation of cellular metabolic process//regulation of macromolecule metabolic process//modification…	GO:0016021//GO:0005575//GO:0031224//GO:0016020//GO:0044425	integral component of membrane//cellular_component//intrinsic component of membrane//membrane//membrane part	GO:0003674//GO:0005488//GO:0003676//GO:1901363//GO:0097159//GO:0003677
AAEL000235	supercont1.4	+	4673130	4701324	1802	605	641	548	465	559	665	741	625	978	16.9254	18.6254	16.6379	16.2979	13.9224	16.3255	20.9994	17.6811	25.8606	17.3963	15.5152	21.5137	532.235	628.651	-0.2402	0.42063	1	FALSE	570.196	743.129	-0.38215	0.13816	0.57975	FALSE	709.251	639.139	0.15017	0.53868	1	FALSE	--	--	--	--	--
AAEL000236	supercont1.4	-	4047113	4048093	981	0	0	0	0	1	0	0	0	1	0	0	0	0	0.0457495	0	0	0	0.0485719	0	0.0152498	0.0161906	0.271614	0	Inf	1	1	FALSE	0.291333	0.266012	0.13118	1	1	FALSE	0.254089	0	Inf	1	1	FALSE	GO:0080090//GO:2001141//GO:0044271//GO:0007275//GO:0018130//GO:0032502//GO:0044260//GO:1901362//GO:0044707//GO:0044237//GO:0016070//GO:0050789//GO:0034654//GO:0034645//GO:0051171//GO:0031326//GO:0071704//GO:0060255//GO:0031323//GO:1901576//GO:0034641//GO:0090304//GO:0097659//GO:0019438//GO:0019222//GO:0044767//GO:0050794//GO:0009889//GO:0009059//GO:0008152//GO:0006355//GO:1903506//GO:0044249//GO:…	regulation of primary metabolic process//regulation of RNA biosynthetic process//cellular nitrogen compound biosynthetic process//multicellular organismal development//heterocycle biosynthetic process//developmental process//cellular macromolecule metabolic process//organic cyclic compound biosynthetic process//single-multicellular organism process//cellular metabolic process//RNA metabolic proce…	GO:0005622//GO:0005575//GO:0043227//GO:0043231//GO:0043226//GO:0005623//GO:0005634//GO:0043229//GO:0044464//GO:0044424	intracellular//cellular_component//membrane-bounded organelle//intracellular membrane-bounded organelle//organelle//cell//nucleus//intracellular organelle//cell part//intracellular part	GO:0003700//GO:0003674//GO:0005488//GO:0043565//GO:0003676//GO:1901363//GO:0097159//GO:0003677//GO:0001071
AAEL000237	supercont1.4	+	3139710	3171323	1104	0	0	0	0	0	0	0	0	0	0	0	0	0	0	0	0	0	0	0	0	0	0	0	NA	NA	NA	NA	0	0	NA	NA	NA	NA	0	0	NA	NA	NA	NA	GO:0007010//GO:0008150//GO:0009987//GO:0071840//GO:0016043//GO:0006996	cytoskeleton organization//biological_process//cellular process//cellular component organization or biogenesis//cellular component organization//organelle organization	--	--	GO:0003779//GO:0008092//GO:0005515//GO:0005488//GO:0003674
AAEL000238	supercont1.4	+	579799	641225	2943	0	0	0	0	0	0	0	0	0	0	0	0	0	0	0	0	0	0	0	0	0	0	0	NA	NA	NA	NA	0	0	NA	NA	NA	NA	0	0	NA	NA	NA	NA	GO:0009987//GO:0010109//GO:0065007//GO:0015979//GO:0019538//GO:0019222//GO:0006508//GO:0042548//GO:0043467//GO:0008150//GO:0006091//GO:0008152//GO:0044238//GO:0043170//GO:0019684//GO:0031323//GO:0071704//GO:0050789//GO:0050794//GO:0042549//GO:0044237	cellular process//regulation of photosynthesis//biological regulation//photosynthesis//protein metabolic process//regulation of metabolic process//proteolysis//regulation of photosynthesis, light reaction//regulation of generation of precursor metabolites and energy//biological_process//generation of precursor metabolites and energy//metabolic process//primary metabolic process//macromolecule met…	GO:0016020//GO:0044464//GO:1902494//GO:0044424//GO:1990204//GO:0009579//GO:0043234//GO:0044436//GO:0009654//GO:0005623//GO:0019898//GO:0098796//GO:0044425//GO:0042651//GO:0009523//GO:0005622//GO:0005575//GO:0009521//GO:0034357//GO:0032991	membrane//cell part//catalytic complex//intracellular part//oxidoreductase complex//thylakoid//protein complex//thylakoid part//photosystem II oxygen evolving complex//cell//extrinsic component of membrane//membrane protein complex//membrane part//thylakoid membrane//photosystem II//intracellular//cellular_component//photosystem//photosynthetic membrane//macromolecular complex	GO:0046872//GO:0005509//GO:0043169//GO:0003824//GO:0008236//GO:0016787//GO:0070011//GO:0005488//GO:0004252//GO:0043167//GO:0017171//GO:0008233//GO:0004175//GO:0003674
AAEL000239	supercont1.4	-	2795212	2799514	3735	8	4	6	42	10	11	9	11	7	0.107979	0.0560753	0.087889	0.710218	0.120161	0.130287	0.123054	0.150137	0.0893021	0.083981	0.320222	0.120831	21.4194	6.52043	1.7159	0.23862	1	FALSE	22.9833	9.04562	1.3453	0.32494	0.82535	FALSE	8.63125	6.63763	0.3789	0.74864	1	FALSE	--	--	--	--	--
AAEL000240	supercont1.4	-	5142014	5168875	1314	166	184	103	132	180	159	141	140	179	6.36872	7.33204	4.2886	6.34471	6.14799	5.35304	5.47983	5.43147	6.49101	5.99645	5.94858	5.80077	147.375	154.933	-0.072146	0.81684	1	FALSE	157.925	147.662	0.096941	0.74342	1	FALSE	140.922	157.35	-0.15907	0.61337	1	FALSE	--	--	--	--	--
AAEL000241	supercont1.4	+	3828458	3830178	1411	51	122	74	104	113	67	113	89	117	1.82214	4.52725	2.86932	4.65521	3.59424	2.10062	4.08973	3.21549	3.95106	3.0729	3.45002	3.75209	89.6926	83.9329	0.095752	0.89075	1	FALSE	96.1693	102.336	-0.089661	0.80303	1	FALSE	97.6657	85.2327	0.19644	0.6816	1	FALSE	--	--	--	--	GO:0003674//GO:0005488//GO:0005515
AAEL000242	supercont1.4	+	3588768	3661068	1521	2	2	5	6	1	1	1	1	0	0.0662888	0.0688498	0.179852	0.249147	0.0295071	0.029085	0.0335748	0.0335162	0	0.104997	0.10258	0.0223637	2.76118	3.38151	-0.29238	0.94248	1	FALSE	2.96372	0.712284	2.0569	0.44452	0.91549	FALSE	0.679496	3.44804	-2.3432	0.35195	1	FALSE	GO:0043933//GO:0044763//GO:0051260//GO:0065003//GO:0051259//GO:0070271//GO:0044765//GO:0055085//GO:0022607//GO:0006810//GO:0016043//GO:0044085//GO:1902578//GO:0051234//GO:0071840//GO:0009987//GO:0008150//GO:0051179//GO:0071822//GO:0006811//GO:0006461//GO:0044699	macromolecular complex subunit organization//single-organism cellular process//protein homooligomerization//macromolecular complex assembly//protein oligomerization//protein complex biogenesis//single-organism transport//transmembrane transport//cellular component assembly//transport//cellular component organization//cellular component biogenesis//single-organism localization//establishment of lo…	GO:0005575//GO:0016020	cellular_component//membrane	GO:0022857//GO:0022838//GO:0015075//GO:0003674//GO:0022803//GO:0022891//GO:0022892//GO:0005215//GO:0005216//GO:0015267
AAEL000243	supercont1.4	+	1272490	1275825	3000	0	0	0	1	0	0	2	0	3	0	0	0	0.0210529	0	0	0.0340449	0	0.0476491	0	0.00701763	0.0272313	0.361747	0	Inf	1	1	FALSE	0.388595	1.44962	-1.8993	0.63805	1	FALSE	1.38411	0	Inf	0.50836	1	FALSE	--	--	--	--	GO:0005488//GO:0005515//GO:0003674
AAEL000244	supercont1.4	+	2830978	2850898	2201	472	464	482	1013	1173	1267	771	804	764	10.8109	11.0382	11.9812	29.0685	23.9185	25.4657	17.8886	18.6217	16.5397	11.2768	26.1509	17.6834	1089.33	503.057	1.1146	3.0732e-05	0.0015791	UP	1167.2	765.158	0.60922	0.015709	0.16188	FALSE	730.179	511.716	0.51291	0.081255	0.77056	FALSE	GO:0019538//GO:0070085//GO:0044763//GO:1901576//GO:0071704//GO:0006464//GO:0034645//GO:0009100//GO:0044237//GO:0044260//GO:0043412//GO:0008150//GO:0009987//GO:0044267//GO:1901137//GO:0009101//GO:0044723//GO:0043413//GO:0044699//GO:0005975//GO:0044238//GO:0043170//GO:0036211//GO:0009058//GO:0044710//GO:0044249//GO:1901135//GO:0006486//GO:0009059//GO:0008152	protein metabolic process//glycosylation//single-organism cellular process//organic substance biosynthetic process//organic substance metabolic process//cellular protein modification process//cellular macromolecule biosynthetic process//glycoprotein metabolic process//cellular metabolic process//cellular macromolecule metabolic process//macromolecule modification//biological_process//cellular pro…	GO:0005575//GO:0016020//GO:0005576	cellular_component//membrane//extracellular region	GO:0016740//GO:0005515//GO:0005488//GO:0003674//GO:0005102//GO:0005185//GO:0016758//GO:0016757//GO:0003824//GO:0005179//GO:0008417//GO:0005184
AAEL000245	supercont1.4	+	5090080	5094668	520	256	250	228	256	348	266	275	211	348	24.8185	25.1732	23.9886	31.0935	30.0353	22.6296	27.0068	20.6854	31.8882	24.6601	27.9195	26.5268	272.005	258.357	0.074266	0.73495	1	FALSE	291.522	263.715	0.14463	0.64465	1	FALSE	251.696	262.713	-0.06181	0.96183	1	FALSE	GO:0044271//GO:0018130//GO:0044237//GO:0016070//GO:1901362//GO:0044260//GO:0006366//GO:0006352//GO:0034654//GO:0034645//GO:0071704//GO:0090304//GO:0034641//GO:1901576//GO:0019438//GO:0097659//GO:1901360//GO:0009058//GO:0008152//GO:0009059//GO:0044249//GO:0006725//GO:0043170//GO:0006367//GO:0044238//GO:0006351//GO:0010467//GO:0032774//GO:0046483//GO:0009987//GO:0008150//GO:0006807//GO:0006139	cellular nitrogen compound biosynthetic process//heterocycle biosynthetic process//cellular metabolic process//RNA metabolic process//organic cyclic compound biosynthetic process//cellular macromolecule metabolic process//transcription from RNA polymerase II promoter//DNA-templated transcription, initiation//nucleobase-containing compound biosynthetic process//cellular macromolecule biosynthetic …	GO:0005622//GO:0030880//GO:0055029//GO:1990234//GO:0031974//GO:0016591//GO:0005669//GO:0005575//GO:0005654//GO:0061695//GO:0032991//GO:0000428//GO:0031981//GO:0043226//GO:0043231//GO:0043227//GO:0044451//GO:0005667//GO:0070013//GO:0005623//GO:0005634//GO:0043229//GO:0090575//GO:0043234//GO:0044422//GO:0044798//GO:0044464//GO:1902494//GO:0044428//GO:0044424//GO:0044446//GO:0043233	intracellular//RNA polymerase complex//nuclear DNA-directed RNA polymerase complex//transferase complex//membrane-enclosed lumen//DNA-directed RNA polymerase II, holoenzyme//transcription factor TFIID complex//cellular_component//nucleoplasm//transferase complex, transferring phosphorus-containing groups//macromolecular complex//DNA-directed RNA polymerase complex//nuclear lumen//organelle//intra…	GO:0003674//GO:0046914//GO:0008270//GO:0005488//GO:0043169//GO:0043167//GO:0046872
AAEL000246	supercont1.4	+	4599206	4629231	10407	74	229	101	98	171	66	244	104	303	0.358464	1.15216	0.530969	0.594749	0.737439	0.280554	1.19731	0.509439	1.3873	0.68053	0.537581	1.03135	102.957	133.857	-0.37866	0.40969	1	FALSE	110.394	200.29	-0.85943	0.046175	0.3254	FALSE	191.185	135.783	0.49367	0.29863	1	FALSE	GO:0023052//GO:0044699//GO:0007156//GO:0007155//GO:0008150//GO:0007154//GO:0044700//GO:0050789//GO:0050794//GO:0050896//GO:0098609//GO:0065007//GO:0009987//GO:0098742//GO:0051716//GO:0007165//GO:0007186//GO:0044763//GO:0022610	signaling//single-organism process//homophilic cell adhesion via plasma membrane adhesion molecules//cell adhesion//biological_process//cell communication//single organism signaling//regulation of biological process//regulation of cellular process//response to stimulus//cell-cell adhesion//biological regulation//cellular process//cell-cell adhesion via plasma-membrane adhesion molecules//cellular…	GO:0044425//GO:0005575//GO:0016020//GO:0031224//GO:0016021	membrane part//cellular_component//membrane//intrinsic component of membrane//integral component of membrane	GO:0043167//GO:0004888//GO:0003674//GO:0060089//GO:0005509//GO:0043169//GO:0046872//GO:0005488//GO:0005515//GO:0004872//GO:0004871//GO:0038023//GO:0004930
AAEL000247	supercont1.4	-	2883065	2896908	1152	1	13	9	2	3	6	1	3	9	0.043761	0.590871	0.427429	0.10965	0.116876	0.230408	0.0443293	0.132756	0.372258	0.35402	0.152311	0.183114	3.45283	7.82048	-1.1795	0.41288	1	FALSE	3.6961	3.87937	-0.069819	0.97413	1	FALSE	3.70346	7.94316	-1.1008	0.41061	1	FALSE	GO:0006810//GO:0098660//GO:0006812//GO:1902600//GO:1902578//GO:0051234//GO:0008150//GO:0009987//GO:0090662//GO:0051179//GO:0006811//GO:0044699//GO:0015991//GO:0098662//GO:0098655//GO:0044763//GO:0015992//GO:0015988//GO:0044765//GO:0006818//GO:0015672//GO:0034220//GO:0055085	transport//inorganic ion transmembrane transport//cation transport//hydrogen ion transmembrane transport//single-organism localization//establishment of localization//biological_process//cellular process//ATP hydrolysis coupled transmembrane transport//localization//ion transport//single-organism process//ATP hydrolysis coupled proton transport//inorganic cation transmembrane transport//cation tr…	GO:0016020//GO:0016469//GO:0098796//GO:0043234//GO:0044425//GO:0033177//GO:0032991//GO:0005575	membrane//proton-transporting two-sector ATPase complex//membrane protein complex//protein complex//membrane part//proton-transporting two-sector ATPase complex, proton-transporting domain//macromolecular complex//cellular_component	GO:0015077//GO:0022891//GO:0022890//GO:0005215//GO:0022892//GO:0008324//GO:0022857//GO:0015078//GO:0003674//GO:0015075//GO:0005488//GO:0005515
AAEL000248	supercont1.4	-	4528750	4556233	2458	495	541	434	421	634	570	595	516	711	10.1523	11.5244	9.6601	10.8177	11.5761	10.2587	12.3617	10.7017	13.783	10.4456	10.8842	12.2821	506.376	513.02	-0.018808	0.98705	1	FALSE	542.57	582.411	-0.10223	0.74107	1	FALSE	555.84	521.49	0.092031	0.72228	1	FALSE	GO:0034641//GO:1901564//GO:0006807//GO:0009987//GO:0006576//GO:0071704//GO:0044106//GO:0009308//GO:0044237//GO:0008150//GO:0008152	cellular nitrogen compound metabolic process//organonitrogen compound metabolic process//nitrogen compound metabolic process//cellular process//cellular biogenic amine metabolic process//organic substance metabolic process//cellular amine metabolic process//amine metabolic process//cellular metabolic process//biological_process//metabolic process	--	--	GO:0036094//GO:0016787//GO:0017076//GO:0032561//GO:0070011//GO:0005488//GO:0032549//GO:0005525//GO:0030554//GO:0032550//GO:0097159//GO:0001882//GO:0003824//GO:0035639//GO:0004175//GO:0032553//GO:0008233//GO:1901265//GO:0004197//GO:0019001//GO:0003674//GO:0008234//GO:0097367//GO:0005524//GO:0043167//GO:0043168//GO:0000166//GO:1901363//GO:0001883//GO:0032559//GO:0032555
AAEL000249	supercont1.4	-	2897299	2906891	951	3	0	3	7	2	1	3	1	5	0.15903	0	0.17259	0.46489	0.0943855	0.0465177	0.161096	0.0536048	0.250521	0.11054	0.201931	0.155074	3.39454	2.33418	0.5403	0.83294	1	FALSE	3.64365	2.69393	0.43567	0.96225	1	FALSE	2.57178	2.38269	0.11018	0.91794	1	FALSE	--	--	--	--	--
AAEL000250	supercont1.4	+	4183567	4186984	2577	0	1	0	3	0	0	0	0	1	0	0.0203183	0	0.0735258	0	0	0	0	0.0184901	0.00677277	0.0245086	0.00616338	1.08524	0.283661	1.9358	0.90768	1	FALSE	1.16578	0.266012	2.1317	0.83279	1	FALSE	0.254089	0.285658	-0.16895	1	1	FALSE	GO:0010468//GO:1901360//GO:0009058//GO:0008152//GO:0006355//GO:0009059//GO:1903506//GO:0044249//GO:0051252//GO:0006725//GO:0043170//GO:2000112//GO:0044238//GO:0010467//GO:0006351//GO:0032774//GO:0046483//GO:0019219//GO:0009987//GO:0010556//GO:0008150//GO:0006139//GO:0006807//GO:0065007//GO:0044271//GO:0018130//GO:0080090//GO:2001141//GO:0044237//GO:0016070//GO:1901362//GO:0044260//GO:0060255//GO:…	regulation of gene expression//organic cyclic compound metabolic process//biosynthetic process//metabolic process//regulation of transcription, DNA-templated//macromolecule biosynthetic process//regulation of nucleic acid-templated transcription//cellular biosynthetic process//regulation of RNA metabolic process//cellular aromatic compound metabolic process//macromolecule metabolic process//regul…	--	--	GO:0097159//GO:1901363//GO:0003676//GO:0003677//GO:0001071//GO:0003674//GO:0003700//GO:0005488//GO:0043565
AAEL000251	supercont1.4	-	2799519	2801942	2370	3	8	4	42	2	4	2	2	2	0.0638135	0.176744	0.092339	1.11927	0.0378737	0.0746639	0.0430948	0.0430196	0.0402102	0.110965	0.410602	0.0421082	17.0129	5.02283	1.7601	0.49144	1	FALSE	18.2669	1.95659	3.2228	0.28367	0.78814	FALSE	1.86717	5.09737	-1.4489	0.36837	1	FALSE	--	--	GO:0005575//GO:0031224//GO:0016021//GO:0044425//GO:0016020	cellular_component//intrinsic component of membrane//integral component of membrane//membrane part//membrane	GO:0008509//GO:0008514//GO:0015171//GO:0015179//GO:0003674//GO:0015075//GO:0005342//GO:0022857//GO:0015562//GO:0022891//GO:0005215//GO:0022892//GO:0034639//GO:0046943
AAEL000252	supercont1.4	-	1116382	1117185	721	0	2	3	2	1	16	0	0	3	0	0.145244	0.227646	0.175197	0.0622473	0.981711	0	0	0.198262	0.124296	0.406385	0.0660875	6.10043	1.82538	1.7407	0.41198	1	FALSE	6.52162	0.798036	3.0307	0.29524	0.79798	FALSE	0.762268	1.85958	-1.2866	0.82456	1	FALSE	GO:0071704//GO:0019538//GO:0006508//GO:0008150//GO:0008152//GO:0044238//GO:0043170	organic substance metabolic process//protein metabolic process//proteolysis//biological_process//metabolic process//primary metabolic process//macromolecule metabolic process	--	--	GO:0016787//GO:0004175//GO:0008233//GO:0070011//GO:0003674//GO:0004252//GO:0008236//GO:0017171//GO:0003824
AAEL000253	supercont1.4	+	885593	886340	567	0	0	0	0	0	0	0	1	0	0	0	0	0	0	0	0	0.0899086	0	0	0	0.0299695	0	0	NA	NA	NA	NA	0	0.38649	#NAME?	1	1	FALSE	0.368577	0	Inf	1	1	FALSE	GO:0006508//GO:0019538//GO:0044238//GO:0043170//GO:0008152//GO:0008150//GO:0071704	proteolysis//protein metabolic process//primary metabolic process//macromolecule metabolic process//metabolic process//biological_process//organic substance metabolic process	--	--	GO:0008236//GO:0003824//GO:0004252//GO:0070011//GO:0016787//GO:0017171//GO:0003674//GO:0004175//GO:0008233
AAEL000254	supercont1.4	+	3942181	3980460	597	2	5	5	1	0	2	0	0	3	0.168887	0.438528	0.458215	0.105793	0	0.148202	0	0	0.239443	0.35521	0.0846652	0.0798142	0.999913	4.23249	-2.0816	0.38296	1	FALSE	1.07023	0.798036	0.4234	1	1	FALSE	0.762268	4.30502	-2.4976	0.29784	1	FALSE	GO:0006810//GO:0032774//GO:0010467//GO:0006351//GO:0051234//GO:0006139//GO:0006807//GO:0065007//GO:0046483//GO:0019219//GO:0009987//GO:0010556//GO:0008150//GO:0008152//GO:0006355//GO:0009059//GO:1903506//GO:0044249//GO:0010468//GO:1901360//GO:0009058//GO:0051179//GO:0043170//GO:2000112//GO:0044238//GO:0051252//GO:0006725//GO:0051171//GO:0034645//GO:0034654//GO:0050789//GO:0031326//GO:0071704//GO:…	transport//RNA biosynthetic process//gene expression//transcription, DNA-templated//establishment of localization//nucleobase-containing compound metabolic process//nitrogen compound metabolic process//biological regulation//heterocycle metabolic process//regulation of nucleobase-containing compound metabolic process//cellular process//regulation of macromolecule biosynthetic process//biological_…	GO:0044464//GO:0031968//GO:0016020//GO:0044446//GO:0098588//GO:0044424//GO:0043229//GO:0005741//GO:0044429//GO:0044422//GO:0005739//GO:0031090//GO:0044425//GO:0031975//GO:0031967//GO:0044444//GO:0043227//GO:0098805//GO:0016021//GO:0005740//GO:0043226//GO:0043231//GO:0005623//GO:0019867//GO:0005622//GO:0005737//GO:0031966//GO:0031224//GO:0005575	cell part//organelle outer membrane//membrane//intracellular organelle part//bounding membrane of organelle//intracellular part//intracellular organelle//mitochondrial outer membrane//mitochondrial part//organelle part//mitochondrion//organelle membrane//membrane part//envelope//organelle envelope//cytoplasmic part//membrane-bounded organelle//whole membrane//integral component of membrane//mitoc…	--
AAEL000255	supercont1.4	+	5118439	5130615	2036	34	46	37	32	38	42	64	48	72	0.841861	1.18299	0.994255	0.992671	0.837648	0.912579	1.60526	1.20184	1.68504	1.00637	0.914299	1.49738	35.2987	40.7606	-0.20756	0.73019	1	FALSE	37.8201	58.5552	-0.63064	0.1557	0.61448	FALSE	55.885	41.4323	0.4317	0.34668	1	FALSE	GO:0051716//GO:0007165//GO:0044763//GO:0050896//GO:0009987//GO:0065007//GO:0007154//GO:0044700//GO:0050789//GO:0035556//GO:0050794//GO:0044699//GO:0023052//GO:0008150	cellular response to stimulus//signal transduction//single-organism cellular process//response to stimulus//cellular process//biological regulation//cell communication//single organism signaling//regulation of biological process//intracellular signal transduction//regulation of cellular process//single-organism process//signaling//biological_process	--	--	--
AAEL000256	supercont1.4	-	4757245	4823472	1563	24	35	37	33	58	38	27	57	46	0.77409	1.1725	1.29514	1.33348	1.66542	1.07553	0.882161	1.85909	1.40234	1.08057	1.35815	1.3812	39.8164	34.0532	0.22557	0.62237	1	FALSE	42.672	43.0629	-0.013155	0.91111	1	FALSE	41.0918	34.642	0.24633	0.6568	1	FALSE	GO:0022610//GO:0008150//GO:0007155	biological adhesion//biological_process//cell adhesion	GO:0005575//GO:0016020	cellular_component//membrane	--
AAEL000257	supercont1.5	+	3690053	3699548	1666	64	183	64	98	133	73	153	111	185	2.00398	5.95151	2.17484	3.84444	3.7075	2.00584	4.85298	3.51465	5.4752	3.37678	3.18593	4.61428	94.8689	101.706	-0.1004	0.70112	1	FALSE	101.709	141.959	-0.48102	0.15412	0.61163	FALSE	135.489	103.106	0.39405	0.38768	1	FALSE	--	--	--	--	--
AAEL000258	supercont1.5	-	1062924	1081755	1683	1188	995	1039	650	1014	1130	1085	1096	1323	40.3573	35.1068	38.305	27.6638	30.6662	33.6855	37.3369	37.6497	42.4796	37.923	30.6719	39.1554	871.115	1144.1	-0.39327	0.20339	0.96946	FALSE	933.123	1129.01	-0.27492	0.3347	0.83335	FALSE	1077.47	1163.79	-0.11119	0.79025	1	FALSE	--	--	GO:0005737//GO:0005623//GO:0044424//GO:0044464//GO:0005575//GO:0005622	cytoplasm//cell//intracellular part//cell part//cellular_component//intracellular	GO:0005488//GO:0016791//GO:0016787//GO:0042578//GO:0043169//GO:0003824//GO:0000287//GO:0046872//GO:0008253//GO:0003674//GO:0008252//GO:0016788//GO:0043167
AAEL000259	supercont1.5	+	1364141	1364648	477	6	5	2	0	3	1	5	1	2	0.634121	0.54885	0.229396	0	0.282266	0.0927428	0.535297	0.106873	0.199786	0.470789	0.125003	0.280652	1.13392	4.40926	-1.9592	0.42373	1	FALSE	1.21482	2.54748	-1.0683	0.7433	1	FALSE	2.43135	4.47598	-0.88044	0.6107	1	FALSE	GO:0044237//GO:0022613//GO:0042254//GO:0006801//GO:0044699//GO:0044710//GO:0008152//GO:0009987//GO:0008150//GO:0071840//GO:0072593//GO:0044085//GO:0055114	cellular metabolic process//ribonucleoprotein complex biogenesis//ribosome biogenesis//superoxide metabolic process//single-organism process//single-organism metabolic process//metabolic process//cellular process//biological_process//cellular component organization or biogenesis//reactive oxygen species metabolic process//cellular component biogenesis//oxidation-reduction process	GO:0005575//GO:0005622//GO:0005623//GO:0043231//GO:0043226//GO:0043227//GO:0005634//GO:0043229//GO:0044424//GO:0044464	cellular_component//intracellular//cell//intracellular membrane-bounded organelle//organelle//membrane-bounded organelle//nucleus//intracellular organelle//intracellular part//cell part	GO:0005488//GO:0003674//GO:0043169//GO:0043167//GO:0046872
AAEL000260	supercont1.5	-	1393391	1406983	2088	10	63	6	28	28	5	48	30	87	0.24144	1.57984	0.157215	0.846955	0.601843	0.105935	1.17396	0.732445	1.98538	0.659497	0.518244	1.29726	19.3295	23.9738	-0.31066	0.66665	1	FALSE	20.7421	50.3758	-1.2802	0.014354	0.15159	FALSE	48.0872	24.221	0.98939	0.25766	1	FALSE	--	--	--	--	--
AAEL000261	supercont1.5	+	1037302	1046183	1485	21	36	24	22	46	20	52	24	64	0.712906	1.26934	0.884216	0.935684	1.39023	0.595803	1.78822	0.82389	2.05356	0.955488	0.973906	1.55522	26.8343	27.8091	-0.05148	0.99379	1	FALSE	28.7668	43.2418	-0.58802	0.23898	0.73641	FALSE	41.2754	28.2508	0.54699	0.27897	1	FALSE	--	--	GO:0005634//GO:0043229//GO:0005575//GO:0005622//GO:0043227//GO:0043231//GO:0044424//GO:0044464//GO:0005623//GO:0043226	nucleus//intracellular organelle//cellular_component//intracellular//membrane-bounded organelle//intracellular membrane-bounded organelle//intracellular part//cell part//cell//organelle	GO:0043167//GO:0003674//GO:0043169//GO:0046872//GO:0008270//GO:0005488//GO:0046914
AAEL000262	supercont1.5	+	4009332	4047714	3241	616	1186	499	522	694	553	694	617	1103	9.58167	19.1605	8.42355	10.1724	9.61028	7.54823	10.9351	9.70489	16.2163	12.3886	9.11031	12.2854	553.785	766.643	-0.46923	0.058966	0.53529	FALSE	593.504	757.976	-0.35289	0.16375	0.62962	FALSE	723.451	777.793	-0.10449	0.64086	1	FALSE	GO:0008150//GO:0016310//GO:0009987//GO:0032501//GO:0044267//GO:0044238//GO:0043170//GO:0044699//GO:0008152//GO:0036211//GO:0006468//GO:0006793//GO:0019538//GO:0044767//GO:0071704//GO:0006464//GO:0044707//GO:0044260//GO:0032502//GO:0044237//GO:0006796//GO:0043412//GO:0007275	biological_process//phosphorylation//cellular process//multicellular organismal process//cellular protein metabolic process//primary metabolic process//macromolecule metabolic process//single-organism process//metabolic process//protein modification process//protein phosphorylation//phosphorus metabolic process//protein metabolic process//single-organism developmental process//organic substance m…	GO:0044424//GO:0044464//GO:0043229//GO:0005634//GO:0005623//GO:0043227//GO:0043231//GO:0043226//GO:0005575//GO:0005622	intracellular part//cell part//intracellular organelle//nucleus//cell//membrane-bounded organelle//intracellular membrane-bounded organelle//organelle//cellular_component//intracellular	GO:0030554//GO:0043168//GO:0000166//GO:0001071//GO:0032549//GO:0043167//GO:0001883//GO:0001882//GO:0004672//GO:0016301//GO:0003824//GO:0032555//GO:0032559//GO:1901363//GO:0032550//GO:0097159//GO:0016773//GO:0017076//GO:1901265//GO:0036094//GO:0035639//GO:0016772//GO:0032553//GO:0005488//GO:0016740//GO:0005524//GO:0097367//GO:0003700//GO:0003674
AAEL000263	supercont1.5	-	249356	263534	4818	63	271	87	129	253	119	235	153	268	0.659194	2.94513	0.98793	1.69105	2.35673	1.09264	2.49083	1.61886	2.65047	1.53075	1.71347	2.25339	153.354	135.954	0.17375	0.85686	1	FALSE	164.393	206.986	-0.33238	0.31766	0.81924	FALSE	197.554	137.756	0.52014	0.34094	1	FALSE	--	--	GO:0044425//GO:0033643//GO:0044217//GO:0018995//GO:0005575//GO:0033646//GO:0016020//GO:0043657//GO:0044215//GO:0016021//GO:0044216//GO:0030430//GO:0043656//GO:0031224	membrane part//host cell part//other organism part//host//cellular_component//host intracellular part//membrane//host cell//other organism//integral component of membrane//other organism cell//host cell cytoplasm//intracellular region of host//intrinsic component of membrane	GO:0043167//GO:0003674//GO:0046872//GO:0043169//GO:0005488
AAEL000264	supercont1.5	-	880869	891964	4183	2486	2264	1733	2082	2289	2805	2277	2443	2490	29.9607	28.3394	22.6665	31.4359	24.5592	29.665	27.7983	29.7728	28.3639	26.9889	28.5533	28.645	2269.91	2260.7	0.005867	0.97493	1	FALSE	2431.91	2348.4	0.050415	0.79382	1	FALSE	2241.08	2297.83	-0.036078	0.87167	1	FALSE	--	--	--	--	GO:0008289//GO:0005488//GO:0003674//GO:0043168//GO:0043167//GO:0003824//GO:0035091//GO:0005543
AAEL000265	supercont1.5	-	1746962	1757087	840	91	90	87	60	87	107	110	89	89	5.46137	5.61003	5.66648	4.51133	4.64832	5.63512	6.68739	5.40126	5.04853	5.57929	4.93159	5.71239	79.4771	94.6557	-0.25215	0.60601	1	FALSE	85.1293	93.91	-0.14162	0.78019	1	FALSE	89.6184	96.2664	-0.10324	0.8177	1	FALSE	--	--	--	--	--
AAEL000266	supercont1.5	+	3889782	3916796	969	0	5	0	0	0	0	0	0	2	0	0.270177	0	0	0	0	0	0	0.0983469	0.090059	0	0.0327823	0	1.4183	#NAME?	0.52969	1	FALSE	0	0.532024	#NAME?	0.85307	1	FALSE	0.508179	1.42829	-1.4909	0.72476	1	FALSE	GO:0044763//GO:0007186//GO:0007165//GO:0051716//GO:0009987//GO:0065007//GO:0050896//GO:0050794//GO:0050789//GO:0044700//GO:0007154//GO:0008150//GO:0044699//GO:0023052	single-organism cellular process//G-protein coupled receptor signaling pathway//signal transduction//cellular response to stimulus//cellular process//biological regulation//response to stimulus//regulation of cellular process//regulation of biological process//single organism signaling//cell communication//biological_process//single-organism process//signaling	GO:0016021//GO:0031224//GO:0016020//GO:0005575//GO:0044425	integral component of membrane//intrinsic component of membrane//membrane//cellular_component//membrane part	GO:0038023//GO:0004871//GO:0004930//GO:0004872//GO:0003674//GO:0060089//GO:0004888
AAEL000267	supercont1.5	+	4707418	4712029	1128	9	33	4	6	19	5	27	7	41	0.412092	1.56938	0.198768	0.344189	0.774501	0.200901	1.25233	0.324112	1.7744	0.726747	0.439864	1.11695	8.92656	14.2666	-0.67647	0.46781	1	FALSE	9.57099	22.4083	-1.2273	0.11471	0.53145	FALSE	21.3925	14.4277	0.56827	0.57674	1	FALSE	--	--	--	--	--
AAEL000268	supercont1.5	-	2208151	2237367	1059	1	1	0	2	0	0	0	0	0	0.047604	0.0494431	0	0.11928	0	0	0	0	0	0.032349	0.0397599	0	0.723494	0.642369	0.17158	1	1	FALSE	0.777189	0	Inf	0.79807	1	FALSE	0	0.650465	#NAME?	0.80525	1	FALSE	--	--	--	--	GO:0003824//GO:0016787//GO:0003674
AAEL000269	supercont1.5	+	3665815	3668702	841	1229	1180	1187	1343	1403	1593	1375	1566	1622	73.6708	73.4663	77.2197	100.859	74.8717	83.7951	83.4929	94.9249	91.8987	74.7856	86.5085	90.1055	1375.2	1273.34	0.11102	0.61142	1	FALSE	1473.55	1484.68	-0.01086	0.99873	1	FALSE	1416.84	1295.15	0.12956	0.61652	1	FALSE	GO:0044767//GO:0044763//GO:0048731//GO:0007165//GO:0051716//GO:0048513//GO:0009987//GO:0065007//GO:0050896//GO:0048856//GO:0050794//GO:0007219//GO:0050789//GO:0044237//GO:0032502//GO:0007423//GO:0044707//GO:0044700//GO:0007154//GO:0007275//GO:0007166//GO:0008150//GO:0032501//GO:0044699//GO:0023052//GO:0008152	single-organism developmental process//single-organism cellular process//system development//signal transduction//cellular response to stimulus//organ development//cellular process//biological regulation//response to stimulus//anatomical structure development//regulation of cellular process//Notch signaling pathway//regulation of biological process//cellular metabolic process//developmental proce…	--	--	GO:0003824//GO:0003674
AAEL000270	supercont1.5	+	1757258	1761282	1253	726	692	550	606	785	889	701	658	739	29.2096	28.9173	24.0151	30.546	28.1173	31.387	28.57	26.7707	28.1027	27.3807	30.0168	27.8144	716.1	687.36	0.059096	0.78959	1	FALSE	767.173	679.275	0.17556	0.46728	0.93163	FALSE	648.25	698.708	-0.10814	0.719	1	FALSE	GO:0043170//GO:0044238//GO:0006725//GO:0044699//GO:0009059//GO:0008152//GO:0044249//GO:0044710//GO:0009058//GO:0006767//GO:1901360//GO:0033013//GO:0006139//GO:0006807//GO:0009987//GO:0046483//GO:0009235//GO:0008150//GO:0009236//GO:0044281//GO:0032774//GO:0006270//GO:1901564//GO:0006260//GO:0006351//GO:0010467//GO:0044260//GO:1901362//GO:0006261//GO:0044237//GO:0016070//GO:0042364//GO:0044711//GO:…	macromolecule metabolic process//primary metabolic process//cellular aromatic compound metabolic process//single-organism process//macromolecule biosynthetic process//metabolic process//cellular biosynthetic process//single-organism metabolic process//biosynthetic process//water-soluble vitamin metabolic process//organic cyclic compound metabolic process//tetrapyrrole metabolic process//nucleobas…	--	--	GO:0003677//GO:0003824//GO:0003676//GO:1901363//GO:0097159//GO:0003887//GO:0005488//GO:0034061//GO:0005515//GO:0016740//GO:0003674//GO:0016779//GO:0016772
AAEL000271	supercont1.5	+	4717798	4725428	2281	2957	2765	2827	2837	4057	5627	2293	2948	4053	65.353	63.4705	67.8069	78.5538	79.8244	109.132	51.336	65.885	84.6654	65.5435	89.1699	67.2954	3923.69	3030.53	0.37264	0.23097	1	FALSE	4202.17	2964.56	0.50331	0.15168	0.60854	FALSE	2829.33	3082.56	-0.12367	0.78066	1	FALSE	GO:1901564//GO:0006520//GO:0044281//GO:0006807//GO:0008150//GO:0009987//GO:0009064//GO:0043436//GO:0008152//GO:0044710//GO:0044238//GO:1901605//GO:0044699//GO:0071704//GO:0044763//GO:0019752//GO:0006082//GO:0044237//GO:0006541	organonitrogen compound metabolic process//cellular amino acid metabolic process//small molecule metabolic process//nitrogen compound metabolic process//biological_process//cellular process//glutamine family amino acid metabolic process//oxoacid metabolic process//metabolic process//single-organism metabolic process//primary metabolic process//alpha-amino acid metabolic process//single-organism p…	--	--	GO:0003824//GO:0016787//GO:0003674
AAEL000272	supercont1.5	+	1766777	1768078	814	5	1	1	3	2	1	2	1	2	0.30966	0.0643247	0.0672124	0.232772	0.110271	0.0543469	0.125473	0.0626268	0.117074	0.147066	0.132463	0.101724	1.94755	2.49655	-0.35828	0.94944	1	FALSE	2.08927	1.5701	0.41214	0.97257	1	FALSE	1.49859	2.53912	-0.76072	0.82472	1	FALSE	GO:0002682//GO:0050896//GO:0048017//GO:0006955//GO:0009987//GO:0014066//GO:0065007//GO:0009405//GO:0010647//GO:0014065//GO:0051704//GO:0051716//GO:0009967//GO:0023056//GO:0010646//GO:0048522//GO:1902531//GO:0007165//GO:0044763//GO:0048518//GO:0048584//GO:0002376//GO:0044699//GO:0050776//GO:0023052//GO:0008150//GO:0009966//GO:0023051//GO:0007154//GO:0048015//GO:0048583//GO:0014068//GO:0044700//GO:…	regulation of immune system process//response to stimulus//inositol lipid-mediated signaling//immune response//cellular process//regulation of phosphatidylinositol 3-kinase signaling//biological regulation//pathogenesis//positive regulation of cell communication//phosphatidylinositol 3-kinase signaling//multi-organism process//cellular response to stimulus//positive regulation of signal transduct…	GO:0005576//GO:0016020//GO:0005575	extracellular region//membrane//cellular_component	GO:0097159//GO:0003676//GO:0005102//GO:0005515//GO:0005488//GO:1901363//GO:0043548//GO:0003674
AAEL000273	supercont1.5	-	1484649	1594835	2898	1809	1839	1415	1325	1578	1929	1799	2002	2089	31.4688	33.2266	26.7136	28.8769	24.4379	29.4464	31.7012	35.2168	34.3475	30.4696	27.5871	33.7552	1523.43	1763.94	-0.21148	0.42903	1	FALSE	1632.05	1915.55	-0.23108	0.40785	0.89281	FALSE	1828.03	1792.89	0.027998	0.94978	1	FALSE	--	--	--	--	GO:0016301//GO:0003824//GO:0016740//GO:0051766//GO:0016773//GO:0008440//GO:0016772//GO:0003674
AAEL000274	supercont1.5	+	1342653	1363914	462	607	706	495	255	248	353	598	448	550	66.2348	80.0138	58.6188	34.8603	24.0916	33.8012	66.1001	49.4334	56.7251	68.2891	30.9177	57.4195	272.242	625.58	-1.2003	2.8815e-05	0.0015023	DOWN	291.651	514.279	-0.81831	0.003361	0.053768	FALSE	490.801	635.677	-0.37315	0.20666	1	FALSE	GO:0006801//GO:0044237//GO:0009987//GO:0008150//GO:0055114//GO:0072593//GO:0044699//GO:0008152//GO:0044710	superoxide metabolic process//cellular metabolic process//cellular process//biological_process//oxidation-reduction process//reactive oxygen species metabolic process//single-organism process//metabolic process//single-organism metabolic process	--	--	GO:0005488//GO:0003674//GO:0046872//GO:0043167//GO:0043169
AAEL000275	supercont1.5	-	1582609	1594701	381	0	0	0	0	0	0	0	0	0	0	0	0	0	0	0	0	0	0	0	0	0	0	0	NA	NA	NA	NA	0	0	NA	NA	NA	NA	0	0	NA	NA	NA	NA	--	--	--	--	--
AAEL000276	supercont1.5	+	1782767	1854937	5710	667	1101	570	754	1077	709	805	711	1167	5.88883	10.0961	5.46151	8.34004	8.46516	5.49299	7.19951	6.34772	9.73844	7.14881	7.43273	7.76189	791.515	790.6	0.0016678	0.93871	1	FALSE	848.406	847.494	0.0015519	0.99056	1	FALSE	808.871	802.607	0.011216	0.98228	1	FALSE	GO:0051321//GO:0016192//GO:0006897//GO:0016043//GO:0051234//GO:0030029//GO:0008150//GO:0044699//GO:0006810//GO:0071840//GO:0009987//GO:0007010//GO:0006996//GO:0051179//GO:0071822//GO:0030036//GO:0007049//GO:0043933//GO:0044763//GO:0022414//GO:1902589//GO:0000003//GO:0007015//GO:0044702	meiotic cell cycle//vesicle-mediated transport//endocytosis//cellular component organization//establishment of localization//actin filament-based process//biological_process//single-organism process//transport//cellular component organization or biogenesis//cellular process//cytoskeleton organization//organelle organization//localization//protein complex subunit organization//actin cytoskeleton o…	--	--	GO:0003674//GO:0005488//GO:0005515
AAEL000277	supercont1.5	-	2484893	2524822	1411	10	18	6	9	44	37	14	3	19	0.357283	0.667956	0.232647	0.402855	1.39953	1.16004	0.506692	0.108387	0.641625	0.419295	0.987475	0.418901	27.0128	11.2091	1.269	0.10148	0.7173	FALSE	28.9263	10.7748	1.4247	0.068257	0.40681	FALSE	10.2863	11.3664	-0.14406	0.91645	1	FALSE	--	--	--	--	GO:0004553//GO:0003796//GO:0003674//GO:0003824//GO:0016787//GO:0016798
AAEL000278	supercont1.5	+	2057794	2070424	2190	1238	1227	924	943	1369	1528	1127	1107	1388	28.4981	29.3361	23.0835	27.1957	28.0553	30.8658	26.2798	25.7684	30.1995	26.9726	28.7056	27.4159	1200.53	1179.62	0.025349	0.87713	1	FALSE	1286.05	1164.24	0.14356	0.54077	0.9659	FALSE	1111.1	1198.92	-0.10975	0.71849	1	FALSE	GO:0044237//GO:0009117//GO:0018130//GO:0006741//GO:0019362//GO:1901566//GO:0044711//GO:0006793//GO:0034654//GO:0071704//GO:0009165//GO:0044699//GO:0072524//GO:0019363//GO:0051186//GO:0044238//GO:0008152//GO:0008150//GO:0006139//GO:0006733//GO:1901362//GO:0044271//GO:0006796//GO:0046496//GO:1901293//GO:1901576//GO:0034641//GO:0006732//GO:0051188//GO:0019438//GO:0044763//GO:0019637//GO:0006739//GO:…	cellular metabolic process//nucleotide metabolic process//heterocycle biosynthetic process//NADP biosynthetic process//pyridine nucleotide metabolic process//organonitrogen compound biosynthetic process//single-organism biosynthetic process//phosphorus metabolic process//nucleobase-containing compound biosynthetic process//organic substance metabolic process//nucleotide biosynthetic process//sing…	--	--	GO:0003674//GO:0016772//GO:0016773//GO:0003951//GO:0016740//GO:0003824//GO:0016301
AAEL000279	supercont1.5	+	204240	205178	817	42	58	49	63	83	53	62	58	73	2.59159	3.71713	3.28131	4.87025	4.55944	2.86981	3.87536	3.61902	4.25751	3.19668	4.09983	3.9173	62.2454	52.0664	0.25761	0.56603	1	FALSE	66.7255	62.0345	0.10517	0.7822	1	FALSE	59.203	52.9318	0.16154	0.71443	1	FALSE	--	--	--	--	--
AAEL000280	supercont1.5	+	3388169	3388966	732	0	0	1	0	0	0	0	0	0	0	0	0.0747416	0	0	0	0	0	0	0.0249139	0	0	0	0.419353	#NAME?	0.98735	1	FALSE	0	0	NA	NA	NA	NA	0	0.429423	#NAME?	0.98345	1	FALSE	--	--	--	--	GO:0003674//GO:0005488//GO:0008270//GO:0046914//GO:0046872//GO:0043167//GO:0043169
AAEL000281	supercont1.5	-	4065666	4086028	562	84	39	60	51	62	57	62	49	93	7.53498	3.63354	5.84102	5.73148	4.95121	4.48681	5.63376	4.44472	7.88499	5.66985	5.0565	5.98782	53.4769	66.3555	-0.3113	0.61185	1	FALSE	57.3076	63.8763	-0.15655	0.66047	1	FALSE	60.9676	67.5498	-0.14791	0.93389	1	FALSE	--	--	--	--	--
AAEL000282	supercont1.5	-	3677125	3681214	1362	75	92	68	80	85	102	72	93	86	2.77603	3.53682	2.73153	3.70976	2.8009	3.313	2.69959	3.48089	3.00868	3.01479	3.27455	3.06305	84.5734	81.5159	0.053121	0.92349	1	FALSE	90.6144	82.2777	0.13924	0.67129	1	FALSE	78.5156	82.8418	-0.077381	0.80592	1	FALSE	GO:0044260//GO:0016070//GO:0044237//GO:0034641//GO:0090304//GO:0071704//GO:0044238//GO:0043170//GO:0006725//GO:0008152//GO:1901360//GO:0006139//GO:0006807//GO:0008150//GO:0009987//GO:0046483//GO:0043631	cellular macromolecule metabolic process//RNA metabolic process//cellular metabolic process//cellular nitrogen compound metabolic process//nucleic acid metabolic process//organic substance metabolic process//primary metabolic process//macromolecule metabolic process//cellular aromatic compound metabolic process//metabolic process//organic cyclic compound metabolic process//nucleobase-containing c…	GO:0005575//GO:0031224//GO:0016021//GO:0044425//GO:0016020	cellular_component//intrinsic component of membrane//integral component of membrane//membrane part//membrane	GO:0005488//GO:0016820//GO:0016740//GO:0005515//GO:0003674//GO:0016779//GO:0016787//GO:0016817//GO:0022857//GO:0016772//GO:0070566//GO:0003824//GO:0005215//GO:0004652
AAEL000283	supercont1.5	+	3104601	3111320	1100	1	2	1	0	6	16	9	1	1	0.0458297	0.0952005	0.0497372	0	0.244802	0.643467	0.417823	0.0463438	0.0433173	0.0635891	0.296089	0.169162	6.73501	1.34538	2.3237	0.25345	1	FALSE	7.2011	3.58464	1.0064	0.53787	0.96446	FALSE	3.42094	1.36555	1.3249	0.58235	1	FALSE	--	--	--	--	--
AAEL000284	supercont1.5	-	4646207	4647174	818	57	46	37	56	55	46	42	41	62	3.51286	2.94447	2.4747	4.32382	3.01762	2.48773	2.62204	2.55514	3.61154	2.97734	3.27639	2.92957	49.8744	49.0108	0.025198	0.97201	1	FALSE	53.4623	46.0222	0.21619	0.68197	1	FALSE	43.9238	49.8229	-0.18181	0.76515	1	FALSE	GO:0005975//GO:0006399//GO:0006725//GO:0016051//GO:1901360//GO:0044710//GO:0009058//GO:0046483//GO:0009987//GO:0006807//GO:0009311//GO:0051704//GO:0016070//GO:0044260//GO:0009451//GO:0034470//GO:0090304//GO:0034641//GO:1901576//GO:0044419//GO:0008033//GO:0044699//GO:0009312//GO:0043170//GO:0044238//GO:0008152//GO:0009877//GO:0008150//GO:0006139//GO:0010467//GO:0044723//GO:0006400//GO:0044237//GO:…	carbohydrate metabolic process//tRNA metabolic process//cellular aromatic compound metabolic process//carbohydrate biosynthetic process//organic cyclic compound metabolic process//single-organism metabolic process//biosynthetic process//heterocycle metabolic process//cellular process//nitrogen compound metabolic process//oligosaccharide metabolic process//multi-organism process//RNA metabolic pro…	--	--	GO:0003824//GO:0097159//GO:0003676//GO:0008170//GO:0003723//GO:0016741//GO:0008176//GO:0016740//GO:0008175//GO:0008757//GO:0005488//GO:0008173//GO:0004809//GO:1901363//GO:0008168//GO:0016423//GO:0003674
AAEL000285	supercont1.5	+	1294551	1331653	1129	1	8	1	4	0	3	9	0	0	0.0446525	0.371021	0.0484596	0.223769	0	0.117551	0.407091	0	0	0.154711	0.113773	0.135697	2.40424	3.04735	-0.34198	0.80561	1	FALSE	2.57683	2.93214	-0.18635	0.95147	1	FALSE	2.79827	3.07949	-0.13816	0.90448	1	FALSE	--	--	--	--	--
AAEL000286	supercont1.5	+	4970081	4979348	588	0	0	0	0	0	0	2	0	1	0	0	0	0	0	0	0.173698	0	0.0810358	0	0	0.0849114	0	0	NA	NA	NA	NA	0	0.917599	#NAME?	0.68458	1	FALSE	0.875927	0	Inf	0.72604	1	FALSE	--	--	--	--	--
AAEL000287	supercont1.5	-	1092116	1099616	1614	21	31	29	18	37	31	51	51	94	0.655926	1.00568	0.983033	0.704372	1.02885	0.849683	1.61365	1.61084	2.7751	0.881547	0.86097	1.99986	26.4527	28.4876	-0.10692	0.95418	1	FALSE	28.3394	61.3316	-1.1138	0.016883	0.17103	FALSE	58.5387	28.9696	1.0149	0.03121	0.46589	FALSE	--	--	GO:0043229//GO:0005634//GO:0044464//GO:0044424//GO:0005622//GO:0005575//GO:0043227//GO:0043231//GO:0043226//GO:0005623	intracellular organelle//nucleus//cell part//intracellular part//intracellular//cellular_component//membrane-bounded organelle//intracellular membrane-bounded organelle//organelle//cell	GO:0043169//GO:0046872//GO:0043167//GO:0003674//GO:0008270//GO:0005488//GO:0046914
AAEL000288	supercont1.5	+	4606152	4626916	1069	75	60	38	48	46	35	56	95	48	3.5369	2.93884	1.94482	2.83594	1.93124	1.4484	2.67518	4.53034	2.13953	2.80685	2.07186	3.11502	41.026	59.8582	-0.54501	0.26278	1	FALSE	43.9825	67.7296	-0.62286	0.36082	0.85859	FALSE	64.6226	60.8181	0.087539	1	1	FALSE	--	--	--	--	GO:0005102//GO:0003674//GO:0005515//GO:0005488//GO:0008083
AAEL000289	supercont1.5	+	1412554	1433614	1485	142	157	116	92	188	175	207	174	237	4.8206	5.53573	4.27371	3.91286	5.68182	5.21327	7.11847	5.9732	7.6046	4.87668	4.93598	6.89876	140.184	144.116	-0.039916	0.99097	1	FALSE	150.165	197.733	-0.39701	0.2474	0.74501	FALSE	188.712	146.464	0.36564	0.28473	1	FALSE	--	--	--	--	GO:0003674//GO:0005488//GO:0005515
AAEL000290	supercont1.5	+	1118830	1120506	1217	54	76	36	52	90	90	52	78	106	2.23688	3.26983	1.6184	2.69865	3.319	3.27153	2.182	3.2673	4.15021	2.37504	3.09639	3.19984	71.9735	56.0252	0.36139	0.45912	1	FALSE	77.1006	75.2848	0.034384	0.9079	1	FALSE	71.8503	56.8688	0.33736	0.49085	1	FALSE	--	--	--	--	--
AAEL000291	supercont1.5	-	118027	142923	2972	46842	39454	29156	33874	43561	42751	34056	25270	28386	794.559	695.095	536.726	719.864	657.817	636.35	585.178	433.452	455.103	675.46	671.344	491.244	37726.7	40220.8	-0.092357	0.74632	1	FALSE	40424.3	28412.8	0.50868	0.034368	0.27464	FALSE	27115.2	40878.9	-0.59225	0.034178	0.4878	FALSE	GO:0051179//GO:0090662//GO:0044699//GO:0006811//GO:1902600//GO:0006812//GO:0098660//GO:0006810//GO:0009987//GO:0008150//GO:0051234//GO:1902578//GO:0055085//GO:0034220//GO:0006818//GO:0015672//GO:0044765//GO:0098655//GO:0098662//GO:0015991//GO:0015988//GO:0015992//GO:0044763	localization//ATP hydrolysis coupled transmembrane transport//single-organism process//ion transport//hydrogen ion transmembrane transport//cation transport//inorganic ion transmembrane transport//transport//cellular process//biological_process//establishment of localization//single-organism localization//transmembrane transport//ion transmembrane transport//hydrogen transport//monovalent inorgan…	GO:0098796//GO:0043234//GO:0044425//GO:0016020//GO:0016469//GO:0005575//GO:0032991//GO:0033177	membrane protein complex//protein complex//membrane part//membrane//proton-transporting two-sector ATPase complex//cellular_component//macromolecular complex//proton-transporting two-sector ATPase complex, proton-transporting domain	GO:0022892//GO:0005215//GO:0022890//GO:0022891//GO:0015077//GO:0015075//GO:0003674//GO:0015078//GO:0022857//GO:0008324
AAEL000292	supercont1.5	-	1026156	1028768	1913	12	34	14	29	29	15	23	10	53	0.316232	0.930606	0.400393	0.95745	0.68036	0.346877	0.613982	0.266483	1.32013	0.549077	0.661562	0.73353	23.1537	19.8199	0.22429	0.86422	1	FALSE	24.8302	25.4568	-0.035956	0.8164	1	FALSE	24.3036	20.102	0.27384	0.66059	1	FALSE	--	--	GO:0043229//GO:0005634//GO:0043231//GO:0043227//GO:0005575//GO:0005622//GO:0044424//GO:0044464//GO:0005623//GO:0043226	intracellular organelle//nucleus//intracellular membrane-bounded organelle//membrane-bounded organelle//cellular_component//intracellular//intracellular part//cell part//cell//organelle	GO:0005198//GO:0043167//GO:0003674//GO:0046872//GO:0043169//GO:0046914//GO:0008270//GO:0005488//GO:0003735
AAEL000293	supercont1.5	+	4654483	4692349	3896	6426	7091	4043	4786	8060	5903	4875	3329	5003	83.1498	95.2995	56.7752	77.5866	92.8478	67.0274	63.8997	43.5591	61.188	78.4082	79.154	56.2156	5804.07	6011.94	-0.050766	0.85513	1	FALSE	6219.81	4205.73	0.56452	0.021188	0.20153	FALSE	4013.93	6106.01	-0.60521	0.030348	0.45837	FALSE	GO:0006725//GO:0006397//GO:1901360//GO:0006807//GO:0009987//GO:0046483//GO:0044260//GO:0016070//GO:0034641//GO:0090304//GO:0043170//GO:0044238//GO:0008152//GO:0006139//GO:0016071//GO:0008150//GO:0010467//GO:0044237//GO:0006396//GO:0071704	cellular aromatic compound metabolic process//mRNA processing//organic cyclic compound metabolic process//nitrogen compound metabolic process//cellular process//heterocycle metabolic process//cellular macromolecule metabolic process//RNA metabolic process//cellular nitrogen compound metabolic process//nucleic acid metabolic process//macromolecule metabolic process//primary metabolic process//meta…	GO:0044424//GO:0044464//GO:0005737//GO:0005623//GO:0043226//GO:0005634//GO:0043229//GO:0005575//GO:0005622//GO:0043227//GO:0043231	intracellular part//cell part//cytoplasm//cell//organelle//nucleus//intracellular organelle//cellular_component//intracellular//membrane-bounded organelle//intracellular membrane-bounded organelle	GO:0003676//GO:0097159//GO:0003723//GO:0005488//GO:1901363//GO:0003674
AAEL000294	supercont1.5	+	1728307	1746920	1438	4856	1231	1372	1562	1462	1615	1598	1887	1553	170.239	44.823	52.1998	68.6049	45.6293	49.6835	56.7493	66.8956	51.4597	89.0873	54.6393	58.3682	1477.47	2666.43	-0.85178	0.38509	1	FALSE	1583.34	1663.04	-0.070857	0.87288	1	FALSE	1586.95	2712.32	-0.77326	0.41933	1	FALSE	--	--	--	--	--
AAEL000297	supercont1.5	-	1767361	1776703	1300	31	31	19	34	43	31	35	24	45	1.20215	1.24859	0.79962	1.65184	1.4845	1.05491	1.37489	0.941136	1.64939	1.08345	1.39709	1.32181	33.8704	27.8812	0.28073	0.66449	1	FALSE	36.3049	32.6491	0.15312	0.81629	1	FALSE	31.162	28.3234	0.13779	0.80035	1	FALSE	GO:0044699//GO:0002376//GO:0048584//GO:0050776//GO:0023052//GO:0048518//GO:0002682//GO:0050896//GO:0048017//GO:0008150//GO:0006955//GO:0009987//GO:0009966//GO:0014066//GO:0065007//GO:0023051//GO:0051704//GO:0048583//GO:0051716//GO:0014068//GO:0044700//GO:0023056//GO:0009967//GO:0010646//GO:0048015//GO:0007154//GO:0009405//GO:0010647//GO:0014065//GO:0035556//GO:1902533//GO:0050794//GO:0044763//GO:…	single-organism process//immune system process//positive regulation of response to stimulus//regulation of immune response//signaling//positive regulation of biological process//regulation of immune system process//response to stimulus//inositol lipid-mediated signaling//biological_process//immune response//cellular process//regulation of signal transduction//regulation of phosphatidylinositol 3-…	GO:0005576//GO:0016020//GO:0005575	extracellular region//membrane//cellular_component	GO:0043548//GO:0005515//GO:0005488//GO:0005102//GO:0003674
AAEL000298	supercont1.5	+	1434419	1461188	1899	9	6	6	7	9	14	8	8	8	0.238922	0.165435	0.172862	0.232812	0.212703	0.326138	0.215133	0.214758	0.200733	0.192407	0.257218	0.210208	9.44391	7.44646	0.34283	0.77165	1	FALSE	10.1136	7.82636	0.36989	0.70368	1	FALSE	7.46869	7.57375	-0.020153	1	1	FALSE	GO:0044699//GO:0006836//GO:0051179//GO:0051234//GO:1902578//GO:0008150//GO:0006810//GO:0044765	single-organism process//neurotransmitter transport//localization//establishment of localization//single-organism localization//biological_process//transport//single-organism transport	GO:0044425//GO:0016020//GO:0005575//GO:0031224//GO:0016021	membrane part//membrane//cellular_component//intrinsic component of membrane//integral component of membrane	GO:0022890//GO:0005326//GO:0022891//GO:0015291//GO:0015293//GO:0005215//GO:0022892//GO:0015077//GO:0022804//GO:0005328//GO:0015370//GO:0003674//GO:0015294//GO:0015075//GO:0046873//GO:0015081//GO:0008324//GO:0022857
AAEL000299	supercont1.5	+	1099635	1111596	1962	25	61	34	36	55	23	67	54	71	0.642363	1.62792	0.948099	1.15887	1.25811	0.518594	1.74389	1.40307	1.7243	1.07279	0.978527	1.62375	35.3006	40.529	-0.19927	0.71116	1	FALSE	37.8515	61.5855	-0.70224	0.12951	0.56035	FALSE	58.7751	41.1457	0.51446	0.31718	1	FALSE	GO:0006351//GO:0044267//GO:0032774//GO:0043043//GO:1901564//GO:0046483//GO:0009987//GO:0006807//GO:0065007//GO:1901360//GO:0009058//GO:1903506//GO:0044249//GO:0051252//GO:0006725//GO:0043604//GO:0006412//GO:0060255//GO:0006518//GO:0031326//GO:0019538//GO:0090304//GO:0034641//GO:1901576//GO:0019222//GO:0019438//GO:0044271//GO:0080090//GO:2001141//GO:0016070//GO:1901362//GO:0044260//GO:0010467//GO:…	transcription, DNA-templated//cellular protein metabolic process//RNA biosynthetic process//peptide biosynthetic process//organonitrogen compound metabolic process//heterocycle metabolic process//cellular process//nitrogen compound metabolic process//biological regulation//organic cyclic compound metabolic process//biosynthetic process//regulation of nucleic acid-templated transcription//cellular…	GO:0016020//GO:0044464//GO:0044424//GO:0043226//GO:0005840//GO:1990904//GO:0005623//GO:0005737//GO:0043228//GO:0005634//GO:0043229//GO:0030529//GO:0044444//GO:0043231//GO:0043232//GO:0043227//GO:0005622//GO:0005575//GO:0032991	membrane//cell part//intracellular part//organelle//ribosome//ribonucleoprotein complex//cell//cytoplasm//non-membrane-bounded organelle//nucleus//intracellular organelle//intracellular ribonucleoprotein complex//cytoplasmic part//intracellular membrane-bounded organelle//intracellular non-membrane-bounded organelle//membrane-bounded organelle//intracellular//cellular_component//macromolecular co…	GO:0046872//GO:0097159//GO:0003676//GO:0043169//GO:0003677//GO:0003735//GO:0046914//GO:0008270//GO:0005488//GO:0043167//GO:0005198//GO:1901363//GO:0003674
AAEL000300	supercont1.5	+	85082	88654	2938	9	49	22	29	49	12	35	18	64	0.154429	0.873266	0.40968	0.623418	0.748514	0.180688	0.608358	0.312324	1.03796	0.479125	0.51754	0.652882	27.6287	26.3535	0.068173	0.98923	1	FALSE	29.6344	35.3844	-0.25584	0.61271	1	FALSE	33.7783	26.7278	0.33776	0.59788	1	FALSE	GO:0034470//GO:0090304//GO:0034641//GO:0016070//GO:0022613//GO:0044260//GO:0042254//GO:0046483//GO:0009987//GO:0006807//GO:0071840//GO:0016072//GO:0006725//GO:1901360//GO:0034660//GO:0006396//GO:0006364//GO:0071704//GO:0044237//GO:0008150//GO:0006139//GO:0010467//GO:0044085//GO:0043170//GO:0044238//GO:0008152	ncRNA processing//nucleic acid metabolic process//cellular nitrogen compound metabolic process//RNA metabolic process//ribonucleoprotein complex biogenesis//cellular macromolecule metabolic process//ribosome biogenesis//heterocycle metabolic process//cellular process//nitrogen compound metabolic process//cellular component organization or biogenesis//rRNA metabolic process//cellular aromatic comp…	GO:1990904//GO:0005623//GO:0032040//GO:0044424//GO:0044464//GO:0005575//GO:0032991//GO:0005622//GO:0030684//GO:0030529	ribonucleoprotein complex//cell//small-subunit processome//intracellular part//cell part//cellular_component//macromolecular complex//intracellular//preribosome//intracellular ribonucleoprotein complex	--
AAEL000301	supercont1.5	-	186418	189115	2562	256	284	207	307	369	257	238	199	319	5.03733	5.80419	4.42043	7.56819	6.46402	4.43765	4.74396	3.95966	5.93289	5.08732	6.15662	4.87884	293.286	259.195	0.17827	0.55854	1	FALSE	314.391	239.308	0.39369	0.19717	0.68504	FALSE	228.4	263.408	-0.20574	0.5729	1	FALSE	GO:0050896//GO:0006950//GO:0008150//GO:0009987//GO:0006457	response to stimulus//response to stress//biological_process//cellular process//protein folding	--	--	GO:0032550//GO:0097159//GO:1901363//GO:0032555//GO:0032559//GO:0001883//GO:0001882//GO:0043167//GO:0032549//GO:0043168//GO:0000166//GO:0030554//GO:0003674//GO:0005515//GO:0097367//GO:0005524//GO:0005488//GO:0032553//GO:0036094//GO:0035639//GO:0051082//GO:0017076//GO:1901265
AAEL000302	supercont1.6	-	364133	364489	288	0	0	0	0	0	0	0	0	0	0	0	0	0	0	0	0	0	0	0	0	0	0	0	NA	NA	NA	NA	0	0	NA	NA	NA	NA	0	0	NA	NA	NA	NA	--	--	--	--	--
AAEL000303	supercont1.6	+	1161567	1161865	297	0	0	0	0	0	0	0	0	0	0	0	0	0	0	0	0	0	0	0	0	0	0	0	NA	NA	NA	NA	0	0	NA	NA	NA	NA	0	0	NA	NA	NA	NA	--	--	--	--	GO:0005488//GO:0003677//GO:0003676//GO:0097159//GO:0003674//GO:1901363
AAEL000304	supercont1.6	-	3154512	3183176	2557	90	84	73	111	332	134	96	99	148	2.48067	2.40474	2.18365	3.83303	8.14667	3.24108	2.68041	2.75934	3.85569	2.35635	5.07359	3.09848	173.087	86.724	0.99699	0.057205	0.52563	FALSE	185.526	108.908	0.76851	0.12082	0.54343	FALSE	103.943	88.1758	0.23733	0.48989	1	FALSE	--	--	--	--	--
AAEL000305	supercont1.6	-	2363786	2365732	1947	14	38	8	19	20	18	24	16	25	0.362495	1.02193	0.224801	0.61634	0.46102	0.408983	0.629489	0.418927	0.611827	0.536407	0.495448	0.553414	18.049	19.1559	-0.08587	0.79518	1	FALSE	19.3447	20.6532	-0.094426	0.88308	1	FALSE	19.7115	19.3977	0.023156	0.91268	1	FALSE	--	--	--	--	GO:0005488//GO:0003674//GO:0046872//GO:0043167//GO:0043169
AAEL000306	supercont1.6	+	1439096	1441541	453	0	1	0	0	2	0	1	1	1	0	0.115586	0	0	0.198147	0	0.112731	0.112535	0.105186	0.0385285	0.066049	0.110151	0.543227	0.283661	0.93739	1	1	FALSE	0.582666	0.978296	-0.7476	1	1	FALSE	0.933586	0.285658	1.7085	0.90534	1	FALSE	GO:0031099//GO:0022610//GO:0044767//GO:0050896//GO:0040007//GO:0009611//GO:0042060//GO:0032502//GO:0009888//GO:0048589//GO:0042246//GO:0048856//GO:0006950//GO:0044699//GO:0008150//GO:0007155	regeneration//biological adhesion//single-organism developmental process//response to stimulus//growth//response to wounding//wound healing//developmental process//tissue development//developmental growth//tissue regeneration//anatomical structure development//response to stress//single-organism process//biological_process//cell adhesion	GO:0031224//GO:0016021//GO:0016020//GO:0005575//GO:0044425	intrinsic component of membrane//integral component of membrane//membrane//cellular_component//membrane part	--
AAEL000307	supercont1.6	-	1330933	1344592	11889	0	1	0	0	0	2	1	1	0	0	0.0044041	0	0	0	0.00744189	0.00429534	0.00428785	0	0.00146803	0.00248063	0.00286106	0.638166	0.283661	1.1698	1	1	FALSE	0.681638	0.712284	-0.063446	1	1	FALSE	0.679496	0.285658	1.2502	1	1	FALSE	GO:0044763//GO:0007017//GO:0051179//GO:0006928//GO:0007018//GO:0044699//GO:0006810//GO:0051234//GO:0008150//GO:0009987	single-organism cellular process//microtubule-based process//localization//movement of cell or subcellular component//microtubule-based movement//single-organism process//transport//establishment of localization//biological_process//cellular process	GO:0005622//GO:0032991//GO:0005575//GO:0043228//GO:0044430//GO:0043232//GO:0005875//GO:0043226//GO:0030286//GO:0005623//GO:0005856//GO:0043229//GO:0044422//GO:0043234//GO:0044464//GO:1902494//GO:0015630//GO:0016020//GO:0044446//GO:0044424	intracellular//macromolecular complex//cellular_component//non-membrane-bounded organelle//cytoskeletal part//intracellular non-membrane-bounded organelle//microtubule associated complex//organelle//dynein complex//cell//cytoskeleton//intracellular organelle//organelle part//protein complex//cell part//catalytic complex//microtubule cytoskeleton//membrane//intracellular organelle part//intracellu…	GO:0003674//GO:0005488//GO:0005515//GO:0097367//GO:0005524//GO:0016817//GO:0035639//GO:0016787//GO:0036094//GO:0016818//GO:0032553//GO:0017076//GO:1901265//GO:1901363//GO:0032550//GO:0005215//GO:0097159//GO:0001883//GO:0001882//GO:0003777//GO:0003824//GO:0016462//GO:0032559//GO:0032555//GO:0003774//GO:0032549//GO:0043167//GO:0017111//GO:0030554//GO:0016887//GO:0043168//GO:0000166
AAEL000308	supercont1.6	+	1436713	1438848	510	0	2	3	4	1	5	2	1	2	0	0.205334	0.321829	0.495362	0.0880006	0.433709	0.200264	0.0999573	0.186859	0.175721	0.339024	0.16236	3.31402	1.82538	0.86038	0.75518	1	FALSE	3.54981	1.5701	1.1769	0.61824	1	FALSE	1.49859	1.85958	-0.31137	1	1	FALSE	GO:0042060//GO:0031099//GO:0009888//GO:0032502//GO:0048589//GO:0022610//GO:0048856//GO:0044767//GO:0042246//GO:0050896//GO:0006950//GO:0044699//GO:0040007//GO:0007155//GO:0009611//GO:0008150	wound healing//regeneration//tissue development//developmental process//developmental growth//biological adhesion//anatomical structure development//single-organism developmental process//tissue regeneration//response to stimulus//response to stress//single-organism process//growth//cell adhesion//response to wounding//biological_process	GO:0005575//GO:0031224//GO:0016021//GO:0044425//GO:0016020	cellular_component//intrinsic component of membrane//integral component of membrane//membrane part//membrane	--
AAEL000309	supercont1.6	-	2323977	2335401	2490	34	42	18	12	152	31	29	16	11	0.690306	0.885676	0.396615	0.305237	2.7474	0.552311	0.596437	0.328494	0.211091	0.657532	1.20165	0.378674	55.5178	31.6582	0.81037	0.46539	1	FALSE	59.5111	18.558	1.6811	0.22299	0.71842	FALSE	17.7089	32.1307	-0.85948	0.12067	0.88292	FALSE	GO:0007155//GO:0008150//GO:0022610	cell adhesion//biological_process//biological adhesion	--	--	GO:0030246//GO:0003674//GO:0005488//GO:0005515
AAEL000310	supercont1.6	-	1224030	1236284	1581	462	375	347	187	151	395	393	576	504	14.7316	12.4194	12.008	7.47038	4.28648	11.0526	12.6942	18.5727	15.1898	13.053	7.60315	15.4856	234.698	417.612	-0.83136	0.046069	0.46216	FALSE	251.282	484.725	-0.94786	0.056716	0.36558	FALSE	462.553	424.672	0.12327	0.73295	1	FALSE	--	--	--	--	--
AAEL000311	supercont1.6	-	3084569	3131356	2423	8	7	9	1	32	2	1	3	0	0.166447	0.151268	0.203218	0.0260663	0.592724	0.0365153	0.0210761	0.0631179	0	0.173644	0.218435	0.0280646	9.69155	8.62947	0.16746	0.80355	1	FALSE	10.3929	1.48526	2.8068	0.259	0.75926	FALSE	1.41665	8.78287	-2.6322	0.054398	0.62976	FALSE	--	--	--	--	--
AAEL000312	supercont1.6	+	3005745	3021914	970	0	0	0	1	0	0	0	0	0	0	0	0	0.065112	0	0	0	0	0	0	0.021704	0	0.361747	0	Inf	1	1	FALSE	0.388595	0	Inf	0.99812	1	FALSE	0	0	NA	NA	NA	NA	--	--	--	--	--
AAEL000313	supercont1.6	-	1168507	1184986	2344	10	6	6	1	4	5	9	12	11	0.215071	0.134028	0.140045	0.0269448	0.0765875	0.0943651	0.196078	0.260981	0.223609	0.163048	0.0659658	0.226889	3.04362	7.80517	-1.3586	0.39785	1	FALSE	3.25802	10.4962	-1.6878	0.15192	0.60911	FALSE	10.0162	7.93856	0.33538	0.75802	1	FALSE	--	--	--	--	--
AAEL000314	supercont1.6	+	658777	678205	703	511	547	671	214	293	297	607	703	525	36.6442	40.7412	52.2205	19.2261	18.7054	18.6896	44.0937	50.9782	35.5843	43.202	18.8737	43.5521	251.764	619.849	-1.2998	0.0017223	0.043233	DOWN	269.743	609.115	-1.1751	0.0042456	0.063991	FALSE	581.235	630.814	-0.11809	0.78235	1	FALSE	GO:0008152//GO:0044710//GO:0044699//GO:0055114//GO:0008150	metabolic process//single-organism metabolic process//single-organism process//oxidation-reduction process//biological_process	--	--	GO:0003674//GO:0003824//GO:0016491
AAEL000315	supercont1.6	+	2381351	2412286	3528	224	180	153	184	237	208	208	170	224	3.2008	2.67144	2.37267	3.29399	3.01492	2.60816	3.01077	2.45643	3.02534	2.7483	2.97235	2.83085	197.303	195.571	0.012724	0.9164	1	FALSE	211.438	193.055	0.13122	0.6581	1	FALSE	184.245	198.837	-0.10996	0.79882	1	FALSE	--	--	--	--	GO:1901363//GO:0003725//GO:0003674//GO:0097159//GO:0003676//GO:0003723//GO:0005488
AAEL000316	supercont1.6	-	3040030	3041665	1461	19	10	17	5	11	5	25	26	9	0.655606	0.358387	0.636608	0.216149	0.337908	0.151397	0.873842	0.90721	0.293526	0.5502	0.235151	0.691526	6.3919	16.7811	-1.3925	0.20008	0.96314	FALSE	6.85173	20.5877	-1.5872	0.073732	0.42554	FALSE	19.6428	17.0881	0.20101	0.80975	1	FALSE	--	--	--	--	--
AAEL000317	supercont1.6	-	387440	388822	1321	0	0	0	1	0	0	0	0	0	0	0	0	0.0478113	0	0	0	0	0	0	0.0159371	0	0.361747	0	Inf	1	1	FALSE	0.388595	0	Inf	0.99812	1	FALSE	0	0	NA	NA	NA	NA	--	--	--	--	--
AAEL000318	supercont1.6	+	3110479	3111363	885	0	0	0	0	0	0	0	0	0	0	0	0	0	0	0	0	0	0	0	0	0	0	0	NA	NA	NA	NA	0	0	NA	NA	NA	NA	0	0	NA	NA	NA	NA	--	--	--	--	GO:0005488//GO:0005549//GO:0003674
AAEL000319	supercont1.6	+	3087173	3088138	864	0	0	0	0	0	0	0	0	0	0	0	0	0	0	0	0	0	0	0	0	0	0	0	NA	NA	NA	NA	0	0	NA	NA	NA	NA	0	0	NA	NA	NA	NA	--	--	--	--	GO:0005549//GO:0005488//GO:0003674
AAEL000320	supercont1.6	-	4030559	4041637	1533	0	0	1	7	0	6	0	1	3	0	0	0.0356888	0.288396	0	0.173144	0	0.0332539	0.0932467	0.0118963	0.153847	0.0421669	4.44673	0.419353	3.4065	0.22425	1	FALSE	4.76507	1.18453	2.0082	0.34431	0.84438	FALSE	1.13085	0.429423	1.3969	0.78401	1	FALSE	GO:0032196//GO:0006313//GO:0044237//GO:0071704//GO:0034645//GO:0009059//GO:0008152//GO:0044238//GO:0043170//GO:0044699//GO:0006260//GO:0006139//GO:0006310//GO:0008150//GO:0044260//GO:0044763//GO:0006259//GO:0034641//GO:1901576//GO:0090304//GO:0044249//GO:0009058//GO:0044710//GO:1901360//GO:0006725//GO:0055114//GO:0006807//GO:0009987//GO:0046483	transposition//transposition, DNA-mediated//cellular metabolic process//organic substance metabolic process//cellular macromolecule biosynthetic process//macromolecule biosynthetic process//metabolic process//primary metabolic process//macromolecule metabolic process//single-organism process//DNA replication//nucleobase-containing compound metabolic process//DNA recombination//biological_process/…	--	--	GO:0003674//GO:0005524//GO:0097367//GO:0035639//GO:0020037//GO:0032553//GO:0004803//GO:0016728//GO:1901265//GO:0046906//GO:1901363//GO:0001883//GO:0032555//GO:0032559//GO:0043167//GO:0005506//GO:0043168//GO:0004748//GO:0000166//GO:0005488//GO:0046914//GO:0036094//GO:0016491//GO:0017076//GO:0003676//GO:0016705//GO:0032550//GO:0097159//GO:0003677//GO:0001882//GO:0043169//GO:0003824//GO:0046872//GO:…
AAEL000321	supercont1.6	-	1032705	1064959	3294	72	481	61	22	23	62	193	158	207	1.10192	7.64581	1.01316	0.421825	0.313372	0.832658	2.9921	2.44522	2.99434	3.25363	0.522618	2.81055	33.9887	187.848	-2.4664	0.10647	0.73457	FALSE	36.3805	179.008	-2.2988	6.1942e-10	6.9366e-08	DOWN	170.839	189.862	-0.15231	0.70443	1	FALSE	GO:0008152//GO:0008150	metabolic process//biological_process	--	--	GO:0003824//GO:0003674
AAEL000322	supercont1.6	+	265339	277403	2079	100	112	80	32	28	14	102	64	123	2.42485	2.82076	2.10528	0.972139	0.604448	0.297901	2.50547	1.56931	2.81906	2.45029	0.62483	2.29795	23.6482	101.189	-2.0972	1.1036e-05	0.00064887	DOWN	25.3638	90.6858	-1.8381	1.6123e-05	0.00063493	DOWN	86.5557	102.828	-0.24854	0.58116	1	FALSE	--	--	--	--	--
AAEL000323	supercont1.6	-	563308	564041	603	0	2	0	0	0	0	3	0	0	0	0.173666	0	0	0	0	0.254066	0	0	0.0578887	0	0.0846887	0	0.567322	#NAME?	0.86323	1	FALSE	0	0.97738	#NAME?	0.67277	1	FALSE	0.932757	0.571315	0.70721	1	1	FALSE	--	--	--	--	--
AAEL000324	supercont1.6	-	2425386	2437842	1608	5	47	15	18	28	8	30	8	40	0.156756	1.53043	0.510363	0.707	0.781498	0.220091	0.952748	0.253623	1.1853	0.732517	0.56953	0.797224	16.6693	21.4159	-0.36149	0.61574	1	FALSE	17.8786	23.5062	-0.39481	0.48453	0.94111	FALSE	22.4398	21.6913	0.048942	1	1	FALSE	GO:0044237//GO:0043412//GO:0006793//GO:0071704//GO:0044238//GO:0043170//GO:0008152//GO:0008150//GO:0016310//GO:0044260//GO:0006796//GO:0019538//GO:0006464//GO:0036211//GO:0006468//GO:0009987//GO:0044267	cellular metabolic process//macromolecule modification//phosphorus metabolic process//organic substance metabolic process//primary metabolic process//macromolecule metabolic process//metabolic process//biological_process//phosphorylation//cellular macromolecule metabolic process//phosphate-containing compound metabolic process//protein metabolic process//cellular protein modification process//pro…	--	--	GO:0097367//GO:0005524//GO:0003674//GO:1901265//GO:0035639//GO:0032553//GO:0016772//GO:0001883//GO:0032559//GO:0032555//GO:1901363//GO:0016773//GO:0043168//GO:0000166//GO:0043167//GO:0005488//GO:0016740//GO:0017076//GO:0036094//GO:0001882//GO:0004672//GO:0016301//GO:0003824//GO:0032550//GO:0097159//GO:0030554//GO:0032549
AAEL000325	supercont1.6	+	3997728	4014099	1503	0	0	1	1	1	0	4	0	0	0	0	0.0364011	0.0420217	0.0298605	0	0.135908	0	0	0.0121337	0.0239607	0.0453026	0.633361	0.419353	0.59486	1	1	FALSE	0.679927	1.30317	-0.93858	0.88885	1	FALSE	1.24368	0.429423	1.5341	0.77334	1	FALSE	GO:0055114//GO:0008150//GO:0008152//GO:0044710//GO:0044699	oxidation-reduction process//biological_process//metabolic process//single-organism metabolic process//single-organism process	--	--	GO:0046872//GO:0043167//GO:0005506//GO:1901363//GO:0046906//GO:0016705//GO:0097159//GO:0043169//GO:0003824//GO:0016491//GO:0020037//GO:0003674//GO:0005488//GO:0046914
AAEL000326	supercont1.6	+	3957227	3959366	1518	0	0	0	0	0	0	0	0	0	0	0	0	0	0	0	0	0	0	0	0	0	0	0	NA	NA	NA	NA	0	0	NA	NA	NA	NA	0	0	NA	NA	NA	NA	GO:0044699//GO:0044710//GO:0008152//GO:0008150//GO:0055114	single-organism process//single-organism metabolic process//metabolic process//biological_process//oxidation-reduction process	--	--	GO:0046914//GO:0005488//GO:0003674//GO:0020037//GO:0016491//GO:0043169//GO:0003824//GO:0097159//GO:1901363//GO:0046906//GO:0016705//GO:0005506//GO:0043167//GO:0046872
AAEL000327	supercont1.6	-	855394	904626	1661	0	66	13	18	31	4	25	17	35	0	2.08054	0.428201	0.684441	0.837621	0.106534	0.768623	0.521752	1.00404	0.836247	0.542865	0.764806	16.2078	24.1732	-0.57672	0.60331	1	FALSE	17.3893	24.0256	-0.46637	0.47337	0.93471	FALSE	22.9319	24.4359	-0.091645	0.82613	1	FALSE	GO:0044699//GO:0051252//GO:0071396//GO:0006725//GO:0043170//GO:2000112//GO:0044238//GO:0023052//GO:0010468//GO:1901360//GO:0042221//GO:0044710//GO:0009058//GO:0050896//GO:0006355//GO:0008152//GO:0009059//GO:0044249//GO:1903506//GO:0046483//GO:0009987//GO:0019219//GO:0010556//GO:0008150//GO:0006807//GO:0006139//GO:0043401//GO:0065007//GO:0006351//GO:0010467//GO:0071407//GO:0014070//GO:0032774//GO:…	single-organism process//regulation of RNA metabolic process//cellular response to lipid//cellular aromatic compound metabolic process//macromolecule metabolic process//regulation of cellular macromolecule biosynthetic process//primary metabolic process//signaling//regulation of gene expression//organic cyclic compound metabolic process//response to chemical//single-organism metabolic process//bi…	GO:0005634//GO:0043229//GO:0044424//GO:0044464//GO:0005575//GO:0005622//GO:0005623//GO:0043226//GO:0043231//GO:0043227	nucleus//intracellular organelle//intracellular part//cell part//cellular_component//intracellular//cell//organelle//intracellular membrane-bounded organelle//membrane-bounded organelle	GO:0003824//GO:0043169//GO:0003677//GO:0097159//GO:1901363//GO:0003676//GO:0043167//GO:0016627//GO:0001071//GO:0046872//GO:0046914//GO:0008270//GO:0005488//GO:0003674//GO:0003700//GO:0043565//GO:0016491
AAEL000328	supercont1.6	-	2221613	2252096	4209	6545	7610	4143	7639	9021	10899	5587	6148	6260	78.3917	94.669	53.853	114.628	96.1903	114.553	67.7864	74.4628	70.8679	75.6379	108.457	71.0391	8691.3	6243.79	0.47715	0.073453	0.60049	FALSE	9311.17	5861.58	0.66767	0.0062109	0.08432	FALSE	5593.72	6340.62	-0.18082	0.42377	1	FALSE	GO:0044763//GO:0070727//GO:1902582//GO:0071702//GO:0071806//GO:0016482//GO:0055085//GO:1902580//GO:0033036//GO:0045184//GO:1902578//GO:0071840//GO:0072594//GO:0046907//GO:0009987//GO:0070585//GO:0006626//GO:0006810//GO:0055114//GO:0051649//GO:0044743//GO:0006996//GO:0017038//GO:0006839//GO:0034613//GO:0044710//GO:1990542//GO:0051179//GO:0006886//GO:0044765//GO:0033365//GO:0065002//GO:0006605//GO:…	single-organism cellular process//cellular macromolecule localization//single-organism intracellular transport//organic substance transport//protein transmembrane transport//cytoplasmic transport//transmembrane transport//single-organism cellular localization//macromolecule localization//establishment of protein localization//single-organism localization//cellular component organization or biogen…	GO:0005623//GO:0098805//GO:0005740//GO:0043226//GO:0031966//GO:0005737//GO:0044446//GO:0098798//GO:0098588//GO:0044424//GO:0044464//GO:0031968//GO:0016020//GO:0098799//GO:0044429//GO:0044422//GO:0031090//GO:0043234//GO:0019867//GO:0043227//GO:0043231//GO:0032991//GO:0005575//GO:0005622//GO:0044455//GO:0005742//GO:0005741//GO:0005739//GO:0031967//GO:0044425//GO:0031975//GO:0044444//GO:0098796//GO:…	cell//whole membrane//mitochondrial envelope//organelle//mitochondrial membrane//cytoplasm//intracellular organelle part//mitochondrial protein complex//bounding membrane of organelle//intracellular part//cell part//organelle outer membrane//membrane//outer mitochondrial membrane protein complex//mitochondrial part//organelle part//organelle membrane//protein complex//outer membrane//membrane-bou…	GO:0016491//GO:0008324//GO:0015078//GO:0008121//GO:0016681//GO:0015077//GO:0003824//GO:0016679//GO:0022857//GO:0015075//GO:0003674//GO:0022890//GO:0022891//GO:0005215//GO:0022892
AAEL000329	supercont1.6	-	1388321	1389481	1100	2	1	0	0	0	0	2	0	0	0.0916593	0.0476003	0	0	0	0	0.0928497	0	0	0.0464199	0	0.0309499	0	1.00108	#NAME?	0.71321	1	FALSE	0	0.651587	#NAME?	0.8305	1	FALSE	0.621838	1.01527	-0.70726	0.95122	1	FALSE	GO:0050896//GO:0006950//GO:0044699//GO:0040007//GO:0008150//GO:0009611//GO:0007155//GO:0042060//GO:0031099//GO:0032502//GO:0009888//GO:0048589//GO:0022610//GO:0044767//GO:0048856//GO:0042246	response to stimulus//response to stress//single-organism process//growth//biological_process//response to wounding//cell adhesion//wound healing//regeneration//developmental process//tissue development//developmental growth//biological adhesion//single-organism developmental process//anatomical structure development//tissue regeneration	GO:0044425//GO:0016020//GO:0005575//GO:0031224//GO:0016021	membrane part//membrane//cellular_component//intrinsic component of membrane//integral component of membrane	--
AAEL000330	supercont1.6	+	772168	774246	631	33	36	28	27	34	23	63	70	122	2.63648	2.98728	2.42774	2.70251	2.41827	1.61249	5.09864	5.65527	9.21266	2.68383	2.24442	6.65552	26.3409	33.7911	-0.35933	0.5846	1	FALSE	28.2362	80.0328	-1.503	0.00054694	0.012645	DOWN	76.3872	34.3462	1.1532	0.0098346	0.22715	FALSE	--	--	--	--	--
AAEL000331	supercont1.6	+	1374159	1375082	924	121	193	133	178	207	173	196	150	201	6.60165	10.9367	7.87505	12.1669	10.0544	8.28272	10.8325	8.27568	10.3652	8.47114	10.168	9.82445	175.816	153.924	0.19185	0.60289	1	FALSE	188.437	175.297	0.10428	0.74743	1	FALSE	167.299	156.387	0.097307	0.80469	1	FALSE	GO:1901576//GO:0034641//GO:0019538//GO:0006518//GO:0006412//GO:0044260//GO:0044271//GO:0006807//GO:0009987//GO:0043043//GO:1901564//GO:0044267//GO:0043604//GO:0044249//GO:0009058//GO:0034645//GO:0071704//GO:0006414//GO:0044237//GO:1901566//GO:0043603//GO:0008150//GO:0010467//GO:0043170//GO:0044238//GO:0008152//GO:0009059	organic substance biosynthetic process//cellular nitrogen compound metabolic process//protein metabolic process//peptide metabolic process//translation//cellular macromolecule metabolic process//cellular nitrogen compound biosynthetic process//nitrogen compound metabolic process//cellular process//peptide biosynthetic process//organonitrogen compound metabolic process//cellular protein metabolic …	GO:0005623//GO:0044464//GO:0005575//GO:0005622	cell//cell part//cellular_component//intracellular	GO:0005488//GO:0003723//GO:0003676//GO:0097159//GO:0003674//GO:0003746//GO:0008135//GO:1901363
AAEL000332	supercont1.6	-	1261111	1263614	1070	46	66	54	44	58	25	54	40	63	2.16727	3.2297	2.76111	2.59718	2.43276	1.03361	2.57723	1.90573	2.80551	2.71936	2.02118	2.42949	39.6475	57.8673	-0.54552	0.30194	1	FALSE	42.5159	49.8112	-0.22847	0.62293	1	FALSE	47.5403	58.8234	-0.30724	0.54663	1	FALSE	--	--	--	--	GO:0004222//GO:0003824//GO:0004175//GO:0016787//GO:0008233//GO:0008237//GO:0070011//GO:0003674
AAEL000333	supercont1.6	+	381403	382417	949	0	0	0	0	0	0	0	0	0	0	0	0	0	0	0	0	0	0	0	0	0	0	0	NA	NA	NA	NA	0	0	NA	NA	NA	NA	0	0	NA	NA	NA	NA	--	--	--	--	--
AAEL000334	supercont1.6	+	1307252	1330839	3247	0	0	0	0	8	0	1	2	0	0	0	0	0	0.110577	0	0.0157275	0.0314002	0	0	0.0368589	0.0157092	2.17291	0	Inf	0.37571	1	FALSE	2.33066	1.09877	1.0848	0.61115	1	FALSE	1.04807	0	Inf	0.69194	1	FALSE	GO:0006793//GO:0006644//GO:1903509//GO:0006886//GO:0046486//GO:0044255//GO:0034645//GO:0071704//GO:0006650//GO:0046467//GO:0044237//GO:0044403//GO:0006505//GO:0044711//GO:0006506//GO:0051641//GO:0046474//GO:0009404//GO:0043412//GO:0019748//GO:0006664//GO:0051234//GO:0008150//GO:0006497//GO:1901137//GO:0016192//GO:0006661//GO:0016043//GO:0042158//GO:0043170//GO:0044238//GO:0008104//GO:0046488//GO:…	phosphorus metabolic process//phospholipid metabolic process//liposaccharide metabolic process//intracellular protein transport//glycerolipid metabolic process//cellular lipid metabolic process//cellular macromolecule biosynthetic process//organic substance metabolic process//glycerophospholipid metabolic process//membrane lipid biosynthetic process//cellular metabolic process//symbiosis, encompa…	GO:0032991//GO:0005575//GO:0005622//GO:0044444//GO:0044425//GO:0098796//GO:0005623//GO:0019012//GO:0005737//GO:0044424//GO:0044464//GO:0048475//GO:0016020//GO:0030117//GO:0043234	macromolecular complex//cellular_component//intracellular//cytoplasmic part//membrane part//membrane protein complex//cell//virion//cytoplasm//intracellular part//cell part//coated membrane//membrane//membrane coat//protein complex	GO:0008092//GO:0003674//GO:0005488//GO:0005515//GO:0003779
AAEL000335	supercont1.6	+	3209273	3211399	2056	9	735	131	294	339	1	510	140	1192	0.220678	18.7183	3.48596	9.03144	7.40001	0.0215167	12.6675	3.47128	27.6253	7.47498	5.48432	14.588	198.75	266.654	-0.42402	0.65883	1	FALSE	213.349	537.35	-1.3326	0.15588	0.61464	FALSE	513.044	269.496	0.92882	0.44869	1	FALSE	GO:0008150//GO:0010556//GO:0009987//GO:0019219//GO:0046483//GO:0065007//GO:0006807//GO:0006139//GO:0010467//GO:0006351//GO:0032774//GO:0006725//GO:0051252//GO:0044238//GO:2000112//GO:0043170//GO:0009058//GO:1901360//GO:0010468//GO:1903506//GO:0044249//GO:0009059//GO:0008152//GO:0006355//GO:0009889//GO:0050794//GO:0097659//GO:0019438//GO:0019222//GO:1901576//GO:0034641//GO:0090304//GO:0031323//GO:…	biological_process//regulation of macromolecule biosynthetic process//cellular process//regulation of nucleobase-containing compound metabolic process//heterocycle metabolic process//biological regulation//nitrogen compound metabolic process//nucleobase-containing compound metabolic process//gene expression//transcription, DNA-templated//RNA biosynthetic process//cellular aromatic compound metabo…	GO:0044424//GO:0044446//GO:0044464//GO:0045111//GO:0043234//GO:0005882//GO:0044422//GO:0043229//GO:0005856//GO:0005623//GO:0043226//GO:0043232//GO:0005575//GO:0044430//GO:0043228//GO:0032991//GO:0005622	intracellular part//intracellular organelle part//cell part//intermediate filament cytoskeleton//protein complex//intermediate filament//organelle part//intracellular organelle//cytoskeleton//cell//organelle//intracellular non-membrane-bounded organelle//cellular_component//cytoskeletal part//non-membrane-bounded organelle//macromolecular complex//intracellular	GO:0005198//GO:0001071//GO:0003677//GO:0097159//GO:0003676//GO:1901363//GO:0043565//GO:0005488//GO:0003674//GO:0003700
AAEL000336	supercont1.6	+	4219541	4276666	1746	12	14	21	5	6	12	7	4	12	0.346479	0.419842	0.658035	0.180867	0.154228	0.304044	0.204737	0.116789	0.327485	0.474785	0.213046	0.216337	7.26741	17.0822	-1.233	0.22632	1	FALSE	7.7808	7.01866	0.14872	0.98984	1	FALSE	6.69981	17.3948	-1.3765	0.15096	0.95753	FALSE	--	--	--	--	GO:0005515//GO:0005488//GO:0003674
AAEL000337	supercont1.6	-	2372014	2381544	1174	19	27	10	18	25	16	28	14	29	0.815877	1.2042	0.466021	0.968361	0.955713	0.602908	1.21796	0.607917	1.17702	0.828699	0.842327	1.00097	18.4071	18.6678	-0.020291	0.95536	1	FALSE	19.7311	22.2474	-0.17317	0.78083	1	FALSE	21.2344	18.9383	0.1651	0.86254	1	FALSE	--	--	--	--	GO:0005488//GO:0043169//GO:0097159//GO:0003676//GO:0046872//GO:0003674//GO:1901363//GO:0043167
AAEL000338	supercont1.6	+	4121636	4165567	1779	0	141	18	44	54	0	59	34	175	0	4.14997	0.553567	1.5621	1.3623	0	1.69363	0.974288	4.68723	1.56785	0.974802	2.45172	30.584	47.5445	-0.6365	0.59864	1	FALSE	32.8301	78.9146	-1.2653	0.15127	0.60769	FALSE	75.3415	48.0073	0.65019	0.65592	1	FALSE	GO:0044699//GO:0044710//GO:0008152//GO:0008150//GO:0055114	single-organism process//single-organism metabolic process//metabolic process//biological_process//oxidation-reduction process	--	--	GO:0046914//GO:0005488//GO:0003674//GO:0020037//GO:0016491//GO:0003824//GO:0043169//GO:0097159//GO:0016705//GO:1901363//GO:0046906//GO:0005506//GO:0043167//GO:0046872
AAEL000339	supercont1.6	-	3278002	3364368	2656	1390	1373	1138	1219	1887	1692	1750	1684	1793	26.3831	27.0673	23.4416	28.9874	31.886	28.182	33.6475	32.322	32.1667	25.6307	29.6851	32.7121	1493.39	1365.29	0.12938	0.54265	1	FALSE	1600.11	1697.95	-0.085623	0.84816	1	FALSE	1620.37	1387.97	0.22335	0.44121	1	FALSE	--	--	--	--	GO:0043167//GO:0003674//GO:0043169//GO:0046872//GO:0046914//GO:0005488//GO:0008270
AAEL000340	supercont1.6	-	4540907	4563320	2380	0	1	0	0	1	2	0	3	0	0	0.0220001	0	0	0.0188573	0.0371751	0	0.0642582	0	0.00733337	0.0186774	0.0214194	0.909779	0.283661	1.6813	0.91827	1	FALSE	0.972971	1.15947	-0.253	1	1	FALSE	1.10573	0.285658	1.9526	0.89348	1	FALSE	GO:0006508//GO:0019538//GO:0044710//GO:0055114//GO:0071704//GO:0008152//GO:0044699//GO:0044238//GO:0043170//GO:0008150	proteolysis//protein metabolic process//single-organism metabolic process//oxidation-reduction process//organic substance metabolic process//metabolic process//single-organism process//primary metabolic process//macromolecule metabolic process//biological_process	--	--	GO:0046914//GO:0005488//GO:0016787//GO:0016491//GO:0097159//GO:0016705//GO:0043169//GO:0003824//GO:0046872//GO:0003674//GO:0020037//GO:0008233//GO:1901363//GO:0046906//GO:0043167//GO:0005506
AAEL000341	supercont1.6	+	1948308	1974397	1410	4	10	2	2	1	1	2	0	3	0.143015	0.37135	0.0776041	0.0895868	0.03183	0.0313747	0.0724359	0	0.101381	0.197323	0.0509305	0.057939	1.31419	5.11015	-1.9592	0.3058	1	FALSE	1.40934	1.44962	-0.040657	1	1	FALSE	1.38411	5.17465	-1.9025	0.27744	1	FALSE	--	--	GO:0044424//GO:0044464//GO:0005623//GO:0005575//GO:0005737//GO:0005622	intracellular part//cell part//cell//cellular_component//cytoplasm//intracellular	GO:0046983//GO:0005515//GO:0005488//GO:0003674
AAEL000342	supercont1.6	+	232504	235619	2661	1	10	0	6	4	0	9	2	9	0.018945	0.196769	0	0.14241	0.0674638	0	0.172719	0.0383151	0.161158	0.0719047	0.0699578	0.124064	3.25694	3.19532	0.027557	0.93297	1	FALSE	3.4969	6.09923	-0.80255	0.50555	0.94987	FALSE	5.82223	3.22138	0.85389	0.67467	1	FALSE	--	--	--	--	GO:0005515//GO:0005488//GO:0003674
AAEL000343	supercont1.6	-	690197	746543	5842	1520	1858	1052	1376	1584	1375	1352	1274	1608	13.5575	17.2126	10.1833	15.3762	12.5779	10.7622	12.2157	11.4908	13.5562	13.6511	12.9054	12.4209	1366.74	1513.44	-0.14709	0.51377	1	FALSE	1464.8	1360.61	0.10645	0.67571	1	FALSE	1298.51	1537.01	-0.24328	0.35354	1	FALSE	GO:0006793//GO:0071704//GO:0044237//GO:0043412//GO:0016310//GO:0008150//GO:0043170//GO:0044238//GO:0008152//GO:0019538//GO:0006464//GO:0044260//GO:0006796//GO:0009987//GO:0044267//GO:0006468//GO:0036211	phosphorus metabolic process//organic substance metabolic process//cellular metabolic process//macromolecule modification//phosphorylation//biological_process//macromolecule metabolic process//primary metabolic process//metabolic process//protein metabolic process//cellular protein modification process//cellular macromolecule metabolic process//phosphate-containing compound metabolic process//cel…	GO:0005575//GO:0044423//GO:0005622//GO:0044463//GO:0005623//GO:0009424//GO:0043226//GO:0043228//GO:0019012//GO:0044461//GO:0042995//GO:0019033//GO:0044424//GO:0044464//GO:0009288//GO:0044422	cellular_component//virion part//intracellular//cell projection part//cell//bacterial-type flagellum hook//organelle//non-membrane-bounded organelle//virion//bacterial-type flagellum part//cell projection//viral tegument//intracellular part//cell part//bacterial-type flagellum//organelle part	GO:1901265//GO:0035639//GO:0032553//GO:0016772//GO:0097367//GO:0005524//GO:0003674//GO:0000166//GO:0043168//GO:0043167//GO:0001883//GO:0032555//GO:0032559//GO:1901363//GO:0016773//GO:0017076//GO:0036094//GO:0005488//GO:0016740//GO:0030554//GO:0032549//GO:0001882//GO:0004672//GO:0003824//GO:0016301//GO:0097159//GO:0032550
AAEL000344	supercont1.6	+	3052765	3053725	961	0	0	0	0	0	0	0	0	0	0	0	0	0	0	0	0	0	0	0	0	0	0	0	NA	NA	NA	NA	0	0	NA	NA	NA	NA	0	0	NA	NA	NA	NA	--	--	--	--	GO:0003674//GO:0005488//GO:0005549
AAEL000345	supercont1.6	-	3364748	3443762	3249	148	111	78	126	177	149	152	142	164	2.29642	1.78886	1.31347	2.44937	2.445	2.02878	2.38911	2.22804	2.40519	1.79958	2.30772	2.34078	141.199	117.285	0.26772	0.44021	1	FALSE	151.311	148.028	0.031644	0.87215	1	FALSE	141.268	119.194	0.24512	0.5104	1	FALSE	GO:0006725//GO:0043170//GO:0006367//GO:0044238//GO:1901360//GO:0009058//GO:0008152//GO:0009059//GO:0044249//GO:0046483//GO:0009987//GO:0008150//GO:0006139//GO:0006807//GO:0010467//GO:0006351//GO:0032774//GO:0044237//GO:0016070//GO:1901362//GO:0044260//GO:0044271//GO:0018130//GO:0090304//GO:1901576//GO:0034641//GO:0097659//GO:0019438//GO:0006366//GO:0006352//GO:0034654//GO:0034645//GO:0071704	cellular aromatic compound metabolic process//macromolecule metabolic process//transcription initiation from RNA polymerase II promoter//primary metabolic process//organic cyclic compound metabolic process//biosynthetic process//metabolic process//macromolecule biosynthetic process//cellular biosynthetic process//heterocycle metabolic process//cellular process//biological_process//nucleobase-cont…	GO:0043234//GO:0044422//GO:0005634//GO:0043229//GO:0090575//GO:0044428//GO:0044424//GO:0044446//GO:0043233//GO:0044798//GO:0044464//GO:1902494//GO:0005575//GO:0005654//GO:0061695//GO:0032991//GO:0000428//GO:0005672//GO:0005622//GO:0030880//GO:0055029//GO:1990234//GO:0031974//GO:0016591//GO:0044451//GO:0005667//GO:0005623//GO:0070013//GO:0031981//GO:0043231//GO:0043226//GO:0043227	protein complex//organelle part//nucleus//intracellular organelle//RNA polymerase II transcription factor complex//nuclear part//intracellular part//intracellular organelle part//organelle lumen//nuclear transcription factor complex//cell part//catalytic complex//cellular_component//nucleoplasm//transferase complex, transferring phosphorus-containing groups//macromolecular complex//DNA-directed R…	GO:0005515//GO:0005488//GO:0003674
AAEL000346	supercont1.6	-	3557211	3558889	1062	32	42	35	27	47	50	49	28	55	1.51902	2.07075	1.80309	1.60573	1.98623	2.08278	2.35621	1.34406	2.4677	1.79762	1.89158	2.05599	38.4872	38.0698	0.015731	0.95058	1	FALSE	41.2256	41.4163	-0.0066555	0.9943	1	FALSE	39.5301	38.7013	0.030572	0.90359	1	FALSE	GO:0006974//GO:0044710//GO:0050896//GO:1901360//GO:0006950//GO:0008152//GO:0006725//GO:0044699//GO:0070525//GO:0006399//GO:0044238//GO:0006281//GO:0043170//GO:0010467//GO:0006400//GO:0008150//GO:0002949//GO:0009987//GO:0033554//GO:0046483//GO:0006807//GO:0006139//GO:0006310//GO:0043412//GO:0016070//GO:0051716//GO:0044237//GO:0044260//GO:0071704//GO:0008033//GO:0034470//GO:0034660//GO:0009451//GO:…	cellular response to DNA damage stimulus//single-organism metabolic process//response to stimulus//organic cyclic compound metabolic process//response to stress//metabolic process//cellular aromatic compound metabolic process//single-organism process//tRNA threonylcarbamoyladenosine metabolic process//tRNA metabolic process//primary metabolic process//DNA repair//macromolecule metabolic process//…	GO:0044423//GO:0019012//GO:0005575//GO:0019028	virion part//virion//cellular_component//viral capsid	GO:0032550//GO:0097159//GO:0003676//GO:0004386//GO:1901363//GO:0003724//GO:0032559//GO:0032555//GO:0016462//GO:0003824//GO:0001883//GO:0001882//GO:0043167//GO:0032549//GO:0043168//GO:0005198//GO:0000166//GO:0017111//GO:0030554//GO:0003723//GO:0016887//GO:0003678//GO:0003674//GO:0005524//GO:0097367//GO:0009378//GO:0005488//GO:0016818//GO:0032553//GO:0016817//GO:0035639//GO:0016787//GO:0036094//GO:…
AAEL000347	supercont1.6	+	4205817	4207321	1386	0	0	0	0	0	0	0	0	0	0	0	0	0	0	0	0	0	0	0	0	0	0	0	NA	NA	NA	NA	0	0	NA	NA	NA	NA	0	0	NA	NA	NA	NA	--	--	--	--	--
AAEL000348	supercont1.6	-	629049	652044	1073	6	31	8	9	18	6	9	4	15	0.281897	1.51274	0.40791	0.529756	0.752885	0.247372	0.428337	0.19004	0.66611	0.734182	0.510004	0.428162	10.0593	14.3006	-0.50755	0.54027	1	FALSE	10.7863	8.46828	0.34905	0.75742	1	FALSE	8.08392	14.4796	-0.8409	0.31414	1	FALSE	--	--	--	--	--
AAEL000350	supercont1.6	+	3114188	3116137	1950	0	0	0	0	0	0	0	0	0	0	0	0	0	0	0	0	0	0	0	0	0	0	0	NA	NA	NA	NA	0	0	NA	NA	NA	NA	0	0	NA	NA	NA	NA	--	--	--	--	GO:0005549//GO:0005488//GO:0003674
AAEL000351	supercont1.6	+	911527	914297	1427	0	0	0	1	0	0	0	0	0	0	0	0	0.0442598	0	0	0	0	0	0	0.0147533	0	0.361747	0	Inf	1	1	FALSE	0.388595	0	Inf	0.99812	1	FALSE	0	0	NA	NA	NA	NA	--	--	--	--	--
AAEL000352	supercont1.6	+	1356185	1356710	461	20	16	16	0	0	0	9	16	17	2.1871	1.81728	1.89886	0	0	0	0.996976	1.76931	1.75712	1.96775	0	1.5078	0	18.4224	#NAME?	3.9176e-05	0.0019136	DOWN	0	13.6382	#NAME?	0.00010159	0.0030984	DOWN	13.015	18.7374	-0.52574	0.50692	1	FALSE	--	--	--	--	--
AAEL000353	supercont1.6	-	407817	419138	675	0	1	0	1	1	0	0	0	0	0	0.0775708	0	0.0935684	0.0664893	0	0	0	0	0.0258569	0.0533526	0	0.633361	0.283661	1.1589	1	1	FALSE	0.679927	0	Inf	0.81348	1	FALSE	0	0.285658	#NAME?	0.98344	1	FALSE	--	--	--	--	--
AAEL000354	supercont1.6	+	2184697	2187759	1327	0	60	24	15	42	2	28	15	39	0	2.36746	0.989496	0.713926	1.42048	0.0666742	1.07753	0.576242	1.40039	1.11898	0.733692	1.01805	17.4721	27.0841	-0.63239	0.59292	1	FALSE	18.7465	25.294	-0.43217	0.6034	0.99608	FALSE	24.1439	27.4456	-0.18492	0.79647	1	FALSE	GO:0044710//GO:0055114//GO:0008152//GO:0044699//GO:0008150	single-organism metabolic process//oxidation-reduction process//metabolic process//single-organism process//biological_process	GO:0016020//GO:0005575	membrane//cellular_component	GO:0016491//GO:0003824//GO:0003674//GO:0016651//GO:0016655
AAEL000356	supercont1.6	-	335958	336518	492	0	3	0	0	0	0	0	0	0	0	0.31927	0	0	0	0	0	0	0	0.106423	0	0	0	0.850983	#NAME?	0.73976	1	FALSE	0	0	NA	NA	NA	NA	0	0.856973	#NAME?	0.66707	1	FALSE	--	--	--	--	--
AAEL000357	supercont1.6	+	3965717	3975409	1506	0	0	0	0	0	0	0	0	0	0	0	0	0	0	0	0	0	0	0	0	0	0	0	NA	NA	NA	NA	0	0	NA	NA	NA	NA	0	0	NA	NA	NA	NA	GO:0044710//GO:0055114//GO:0044699//GO:0008152//GO:0008150	single-organism metabolic process//oxidation-reduction process//single-organism process//metabolic process//biological_process	--	--	GO:0003824//GO:0043169//GO:0016705//GO:0097159//GO:0046872//GO:0005488//GO:0046914//GO:0016491//GO:1901363//GO:0046906//GO:0005506//GO:0043167//GO:0003674//GO:0020037
AAEL000358	supercont1.6	+	3119075	3119677	603	0	0	0	0	0	0	0	0	0	0	0	0	0	0	0	0	0	0	0	0	0	0	0	NA	NA	NA	NA	0	0	NA	NA	NA	NA	0	0	NA	NA	NA	NA	GO:0009877//GO:0008150//GO:0009653//GO:0009886//GO:0009878//GO:0032501//GO:0044699//GO:0048856//GO:0044767//GO:0044419//GO:0044111//GO:0051704//GO:0044403//GO:0009791//GO:0032502//GO:0044707//GO:0007275	nodulation//biological_process//anatomical structure morphogenesis//post-embryonic morphogenesis//nodule morphogenesis//multicellular organismal process//single-organism process//anatomical structure development//single-organism developmental process//interspecies interaction between organisms//development involved in symbiotic interaction//multi-organism process//symbiosis, encompassing mutualis…	--	--	GO:0043167//GO:0046872//GO:0043169//GO:0005549//GO:0005488//GO:0003674
AAEL000359	supercont1.6	-	2412288	2412969	630	0	0	0	0	0	0	0	0	0	0	0	0	0	0	0	0	0	0	0	0	0	0	0	NA	NA	NA	NA	0	0	NA	NA	NA	NA	0	0	NA	NA	NA	NA	GO:0044271//GO:0007154//GO:0018130//GO:0055076//GO:0080090//GO:0006879//GO:2001141//GO:0044237//GO:0051716//GO:0016070//GO:0044260//GO:1901362//GO:0098771//GO:0044700//GO:0060255//GO:0031323//GO:0050789//GO:0034654//GO:0007165//GO:0034645//GO:0051171//GO:0031326//GO:0071704//GO:0050794//GO:0009889//GO:0035556//GO:1901576//GO:0034641//GO:0090304//GO:0097659//GO:0019438//GO:0044763//GO:0019222//GO:…	cellular nitrogen compound biosynthetic process//cell communication//heterocycle biosynthetic process//transition metal ion homeostasis//regulation of primary metabolic process//cellular iron ion homeostasis//regulation of RNA biosynthetic process//cellular metabolic process//cellular response to stimulus//RNA metabolic process//cellular macromolecule metabolic process//organic cyclic compound bi…	--	--	GO:0003674//GO:0046914//GO:0005488//GO:0097159//GO:0003676//GO:1901363//GO:0043169//GO:0003677//GO:0043167//GO:0046872//GO:0008199//GO:0005506
AAEL000360	supercont1.6	+	621609	629142	1090	5	5	3	2	9	16	3	2	4	0.231251	0.240185	0.15058	0.115887	0.370571	0.64937	0.140552	0.093538	0.174859	0.207339	0.37861	0.136316	8.27334	4.46991	0.88823	0.51272	1	FALSE	8.85229	2.81441	1.6532	0.17286	0.64389	FALSE	2.68627	4.54059	-0.75728	0.68005	1	FALSE	--	--	--	--	--
AAEL000361	supercont1.6	-	374332	374803	405	0	0	0	0	0	0	1	1	1	0	0	0	0	0	0	0.126092	0.125872	0.117652	0	0	0.123205	0	0	NA	NA	NA	NA	0	0.978296	#NAME?	0.67259	1	FALSE	0.933586	0	Inf	0.71402	1	FALSE	--	--	--	--	--
AAEL000362	supercont1.6	-	777694	807285	3192	232	180	171	502	678	654	105	112	171	3.66408	2.95265	2.93094	9.93285	9.53285	9.06387	1.67985	1.78871	2.55263	3.18255	9.50985	2.00706	574.431	205.989	1.4796	4.3432e-07	4.2052e-05	UP	615.494	122.983	2.3233	7.7947e-15	1.4897e-12	UP	117.376	209.485	-0.8357	0.024414	0.40532	FALSE	--	--	GO:0043229//GO:0044444//GO:0005739//GO:0044464//GO:0044424//GO:0005737//GO:0005622//GO:0005575//GO:0043231//GO:0043226//GO:0043227//GO:0005623	intracellular organelle//cytoplasmic part//mitochondrion//cell part//intracellular part//cytoplasm//intracellular//cellular_component//intracellular membrane-bounded organelle//organelle//membrane-bounded organelle//cell	GO:0005198//GO:0003674//GO:0003735//GO:0005515//GO:0005488
AAEL000363	supercont1.6	-	401862	402457	534	0	0	0	0	0	0	0	0	0	0	0	0	0	0	0	0	0	0	0	0	0	0	0	NA	NA	NA	NA	0	0	NA	NA	NA	NA	0	0	NA	NA	NA	NA	--	--	--	--	--
AAEL000364	supercont1.6	-	1133051	1142465	625	84	76	87	35	308	13	59	21	60	6.77546	6.36701	7.61575	3.53689	22.117	0.920157	4.82075	1.71287	4.57431	6.91941	8.85802	3.70264	100.466	88.1735	0.18829	0.76164	1	FALSE	107.762	43.2988	1.3154	0.41127	0.89359	FALSE	41.3297	89.7136	-1.1181	0.01916	0.35209	FALSE	--	--	--	--	--
AAEL000366	supercont1.6	+	4826743	4827610	868	0	0	0	0	0	0	0	0	0	0	0	0	0	0	0	0	0	0	0	0	0	0	0	NA	NA	NA	NA	0	0	NA	NA	NA	NA	0	0	NA	NA	NA	NA	GO:0008150//GO:0009607//GO:0051701//GO:0052200//GO:0044415//GO:0051834//GO:0050896//GO:0051807//GO:0044419//GO:0075136//GO:0044413//GO:0044403//GO:0051704//GO:0051832//GO:0009605//GO:0043207//GO:0051707//GO:0030682//GO:0052173	biological_process//response to biotic stimulus//interaction with host//response to host defenses//evasion or tolerance of host defenses//evasion or tolerance of defenses of other organism involved in symbiotic interaction//response to stimulus//evasion or tolerance of defense response of other organism involved in symbiotic interaction//interspecies interaction between organisms//response to hos…	--	--	--
AAEL000367	supercont1.6	+	3557323	3557889	567	0	0	0	0	0	0	0	0	0	0	0	0	0	0	0	0	0	0	0	0	0	0	0	NA	NA	NA	NA	0	0	NA	NA	NA	NA	0	0	NA	NA	NA	NA	GO:0032774//GO:0006400//GO:0006351//GO:0010467//GO:0006310//GO:0006807//GO:0006139//GO:0065007//GO:0033554//GO:0046483//GO:0019219//GO:0009987//GO:0010556//GO:0002949//GO:0008150//GO:0006355//GO:0008152//GO:0009059//GO:0006950//GO:1903506//GO:0044249//GO:1901360//GO:0010468//GO:0050896//GO:0009058//GO:0044710//GO:0006974//GO:0043170//GO:2000112//GO:0006281//GO:0044238//GO:0006399//GO:0070525//GO:…	RNA biosynthetic process//tRNA modification//transcription, DNA-templated//gene expression//DNA recombination//nitrogen compound metabolic process//nucleobase-containing compound metabolic process//biological regulation//cellular response to stress//heterocycle metabolic process//regulation of nucleobase-containing compound metabolic process//cellular process//regulation of macromolecule biosynth…	--	--	GO:0032549//GO:0043167//GO:0016887//GO:0003723//GO:0030554//GO:0017111//GO:0000166//GO:0043168//GO:0003724//GO:0004386//GO:1901363//GO:0003676//GO:0097159//GO:0032550//GO:0001882//GO:0001883//GO:0003824//GO:0016462//GO:0032559//GO:0032555//GO:0016787//GO:0036094//GO:0016817//GO:0035639//GO:0032553//GO:0016818//GO:0008134//GO:1901265//GO:0017076//GO:0003674//GO:0003678//GO:0005488//GO:0009378//GO:…
AAEL000369	supercont1.6	+	389053	395215	6100	12	14	20	34	38	46	17	32	42	0.0991724	0.120171	0.17938	0.352032	0.279582	0.333601	0.142319	0.267427	0.328076	0.132908	0.321738	0.24594	37.2985	16.6628	1.1625	0.063801	0.56203	FALSE	39.9605	29.0787	0.45861	0.38473	0.87342	FALSE	27.7519	16.9654	0.70999	0.22465	1	FALSE	--	--	--	--	--
AAEL000370	supercont1.6	-	3222909	3272844	3658	167	353	172	243	416	210	329	238	465	2.30151	5.05281	2.57252	4.19561	5.10394	2.53965	4.59299	3.31679	6.05709	3.30895	3.9464	4.65562	267.903	232.165	0.20656	0.55519	1	FALSE	287.195	322.866	-0.16891	0.55394	0.97266	FALSE	308.165	235.621	0.38724	0.25357	1	FALSE	GO:0006635//GO:0006629//GO:0016042//GO:0044763//GO:0044242//GO:0009062//GO:0034440//GO:0030258//GO:0009056//GO:0044710//GO:0006631//GO:0019395//GO:0009987//GO:0044281//GO:0055114//GO:0044712//GO:0006082//GO:1901575//GO:0044237//GO:0019752//GO:0046395//GO:0072329//GO:0032787//GO:0044255//GO:0071704//GO:0044238//GO:0044699//GO:0043436//GO:0008152//GO:0044248//GO:0008150//GO:0044282//GO:0016054	fatty acid beta-oxidation//lipid metabolic process//lipid catabolic process//single-organism cellular process//cellular lipid catabolic process//fatty acid catabolic process//lipid oxidation//lipid modification//catabolic process//single-organism metabolic process//fatty acid metabolic process//fatty acid oxidation//cellular process//small molecule metabolic process//oxidation-reduction process//…	GO:0019012//GO:0005737//GO:0005623//GO:0042579//GO:0043226//GO:0044424//GO:0044464//GO:0005575//GO:0044423//GO:0005777//GO:0005622//GO:0043227//GO:0019028//GO:0043231//GO:0044444//GO:0043229	virion//cytoplasm//cell//microbody//organelle//intracellular part//cell part//cellular_component//virion part//peroxisome//intracellular//membrane-bounded organelle//viral capsid//intracellular membrane-bounded organelle//cytoplasmic part//intracellular organelle	GO:0016491//GO:0003824//GO:0003995//GO:0016627//GO:0003997//GO:0003674//GO:0016634//GO:0005198
AAEL000371	supercont1.6	+	4678773	4680040	750	2	0	0	3	5	2	2	5	9	0.134434	0	0	0.252635	0.299202	0.117969	0.136179	0.339855	0.571789	0.0448112	0.223269	0.349274	3.08148	0.717416	2.1027	0.48935	1	FALSE	3.30409	4.97815	-0.59136	0.7114	1	FALSE	4.75153	0.729615	2.7032	0.18778	1	FALSE	--	--	--	--	GO:0005515//GO:0005488//GO:0003674
AAEL000372	supercont1.6	-	1018516	1020488	1599	107	98	81	116	108	185	147	111	113	3.37345	3.20907	2.77147	4.58187	3.03131	5.11826	4.69474	3.53882	3.36732	3.118	4.24381	3.86696	130.327	100.148	0.38	0.31935	1	FALSE	139.592	120.851	0.20799	0.55514	0.97403	FALSE	115.329	101.812	0.17985	0.64843	1	FALSE	GO:0044237//GO:0006793//GO:0006644//GO:0044255//GO:0046486//GO:0071704//GO:0006650//GO:0044238//GO:0046488//GO:0044699//GO:0008152//GO:0016310//GO:0008150//GO:0046854//GO:0006629//GO:0006796//GO:0044763//GO:0019637//GO:0030258//GO:0044710//GO:0009987//GO:0046834	cellular metabolic process//phosphorus metabolic process//phospholipid metabolic process//cellular lipid metabolic process//glycerolipid metabolic process//organic substance metabolic process//glycerophospholipid metabolic process//primary metabolic process//phosphatidylinositol metabolic process//single-organism process//metabolic process//phosphorylation//biological_process//phosphatidylinosito…	--	--	--
AAEL000373	supercont1.6	+	1405662	1406332	597	0	0	0	0	0	0	0	0	0	0	0	0	0	0	0	0	0	0	0	0	0	0	0	NA	NA	NA	NA	0	0	NA	NA	NA	NA	0	0	NA	NA	NA	NA	GO:0042060//GO:0031099//GO:0009888//GO:0032502//GO:0048589//GO:0022610//GO:0048856//GO:0044767//GO:0042246//GO:0051179//GO:0050896//GO:0006950//GO:0044699//GO:0040007//GO:0016192//GO:0006810//GO:0007155//GO:0008150//GO:0009611//GO:0051234	wound healing//regeneration//tissue development//developmental process//developmental growth//biological adhesion//anatomical structure development//single-organism developmental process//tissue regeneration//localization//response to stimulus//response to stress//single-organism process//growth//vesicle-mediated transport//transport//cell adhesion//biological_process//response to wounding//estab…	GO:0005575//GO:0031224//GO:0016021//GO:0044425//GO:0016020	cellular_component//intrinsic component of membrane//integral component of membrane//membrane part//membrane	--
AAEL000374	supercont1.6	-	542238	543999	1687	0	13	0	11	31	3	6	2	1	0	0.403488	0	0.411823	0.824712	0.0786692	0.181626	0.0604365	0.0282449	0.134496	0.438401	0.0901026	13.3565	3.68759	1.8568	0.25264	1	FALSE	14.3283	2.99375	2.2588	0.081678	0.44771	FALSE	2.85676	3.71355	-0.37842	0.74611	1	FALSE	--	--	--	--	--
AAEL000375	supercont1.6	-	363500	363964	390	0	1	0	0	0	0	0	0	0	0	0.134257	0	0	0	0	0	0	0	0.0447524	0	0	0	0.283661	#NAME?	0.98734	1	FALSE	0	0	NA	NA	NA	NA	0	0.285658	#NAME?	0.98344	1	FALSE	--	--	--	--	--
AAEL000377	supercont1.6	+	3059016	3060090	1075	0	0	0	0	0	0	0	0	0	0	0	0	0	0	0	0	0	0	0	0	0	0	0	NA	NA	NA	NA	0	0	NA	NA	NA	NA	0	0	NA	NA	NA	NA	--	--	--	--	GO:0005488//GO:0005549//GO:0003674
AAEL000378	supercont1.6	+	825774	840929	2039	243	332	233	289	357	283	323	277	463	6.00798	8.52556	6.2519	8.95187	7.8579	6.14	8.08962	6.92543	10.8198	6.92848	7.64992	8.61161	291.811	279.051	0.064508	0.84353	1	FALSE	312.761	335.453	-0.10105	0.67983	1	FALSE	320.166	283.542	0.17526	0.54924	1	FALSE	GO:0006793//GO:0019538//GO:0008150//GO:0016310//GO:0009987//GO:0071704//GO:0006464//GO:0044267//GO:0044238//GO:0044260//GO:0043170//GO:0044237//GO:0008152//GO:0043412//GO:0036211//GO:0006796//GO:0006468	phosphorus metabolic process//protein metabolic process//biological_process//phosphorylation//cellular process//organic substance metabolic process//cellular protein modification process//cellular protein metabolic process//primary metabolic process//cellular macromolecule metabolic process//macromolecule metabolic process//cellular metabolic process//metabolic process//macromolecule modification…	--	--	GO:0030554//GO:0043168//GO:0017076//GO:1901265//GO:0000166//GO:0036094//GO:0035639//GO:0032549//GO:0016772//GO:0032553//GO:0043167//GO:0005488//GO:0001883//GO:0004672//GO:0001882//GO:0016740//GO:0016301//GO:0005515//GO:0005524//GO:0097367//GO:0032559//GO:0032555//GO:0003824//GO:1901363//GO:0003674//GO:0032550//GO:0097159//GO:0016773
AAEL000379	supercont1.6	-	321427	322521	1027	0	2	0	1	0	0	2	1	1	0	0.101967	0	0.0614982	0	0	0.0994495	0.049638	0.0463964	0.0339892	0.0204994	0.0651613	0.361747	0.567322	-0.64919	0.97751	1	FALSE	0.388595	1.30409	-1.7467	0.73287	1	FALSE	1.2445	0.571315	1.1232	0.93533	1	FALSE	GO:0007417//GO:0044767//GO:0048731//GO:0030900//GO:0048513//GO:0021537//GO:0044707//GO:0032502//GO:0021543//GO:0007275//GO:0007399//GO:0048856//GO:0021987//GO:0007420//GO:0060322//GO:0044699//GO:0008150//GO:0032501	central nervous system development//single-organism developmental process//system development//forebrain development//organ development//telencephalon development//single-multicellular organism process//developmental process//pallium development//multicellular organismal development//nervous system development//anatomical structure development//cerebral cortex development//brain development//head…	--	--	--
AAEL000380	supercont1.6	+	1358042	1358818	777	84	91	35	90	97	65	106	98	101	5.45001	6.13229	2.46445	7.31568	5.60282	3.70076	6.96671	6.42968	6.19377	4.68225	5.53975	6.53005	79.6441	70.622	0.17345	0.78531	1	FALSE	85.386	99.2773	-0.21746	0.5879	0.98679	FALSE	94.741	71.6685	0.40265	0.41035	1	FALSE	GO:0051716//GO:0044700//GO:0007154//GO:0050794//GO:0035556//GO:0007264//GO:0044763//GO:0007165//GO:0050789//GO:0044699//GO:0023052//GO:0050896//GO:0009987//GO:0008150//GO:0065007	cellular response to stimulus//single organism signaling//cell communication//regulation of cellular process//intracellular signal transduction//small GTPase mediated signal transduction//single-organism cellular process//signal transduction//regulation of biological process//single-organism process//signaling//response to stimulus//cellular process//biological_process//biological regulation	--	--	GO:0097367//GO:0005488//GO:0003674//GO:0019001//GO:0032561//GO:1901265//GO:0017076//GO:0032553//GO:0036094//GO:0035639//GO:0032555//GO:0001882//GO:0001883//GO:0097159//GO:0032550//GO:1901363//GO:0000166//GO:0043168//GO:0043167//GO:0005525//GO:0032549
AAEL000381	supercont1.6	+	5027660	5074652	705	5	1	1	1	1	0	0	3	3	0.357536	0.0742699	0.0776041	0.0895868	0.06366	0	0	0.216929	0.202762	0.169803	0.0510823	0.139897	0.633361	2.49655	-1.9788	0.59393	1	FALSE	0.679927	1.95751	-1.5256	0.67382	1	FALSE	1.868	2.53912	-0.44283	0.91617	1	FALSE	--	--	--	--	--
AAEL000382	supercont1.6	-	1442671	1447724	3229	0	0	0	0	0	0	0	0	0	0	0	0	0	0	0	0	0	0	0	0	0	0	0	NA	NA	NA	NA	0	0	NA	NA	NA	NA	0	0	NA	NA	NA	NA	--	--	GO:0019012//GO:0019031//GO:0005575//GO:0044423//GO:0036338	virion//viral envelope//cellular_component//virion part//viral membrane	--
AAEL000383	supercont1.7	+	4668745	4673765	2827	137	145	100	157	222	192	150	122	187	2.44306	2.68562	1.9353	3.50757	3.52438	3.00451	2.70962	2.19998	3.15188	2.35466	3.34549	2.68716	178.356	132.209	0.43194	0.20825	0.97876	FALSE	191.122	145.765	0.39085	0.2214	0.71596	FALSE	139.119	134.341	0.050417	0.87005	1	FALSE	GO:0032506//GO:0050794//GO:0019069//GO:0000281//GO:0006886//GO:0050789//GO:0040011//GO:0034645//GO:0071704//GO:0031331//GO:0031323//GO:0044765//GO:0061640//GO:0044237//GO:0044403//GO:0022607//GO:0051641//GO:0043412//GO:0006139//GO:0051234//GO:0044248//GO:0008150//GO:0000278//GO:0022402//GO:0051701//GO:1901137//GO:0090529//GO:0044723//GO:0006260//GO:0016043//GO:0044085//GO:0006811//GO:0043170//GO:…	cytokinetic process//regulation of cellular process//viral capsid assembly//mitotic cytokinesis//intracellular protein transport//regulation of biological process//locomotion//cellular macromolecule biosynthetic process//organic substance metabolic process//positive regulation of cellular catabolic process//regulation of cellular metabolic process//single-organism transport//cytoskeleton-dependen…	GO:0043227//GO:0043231//GO:0005783//GO:0005575//GO:0012505//GO:0005622//GO:0044444//GO:0044425//GO:0043229//GO:0005623//GO:0005886//GO:0071944//GO:0016021//GO:0043226//GO:0031224//GO:0005737//GO:0044424//GO:0044464//GO:0016020	membrane-bounded organelle//intracellular membrane-bounded organelle//endoplasmic reticulum//cellular_component//endomembrane system//intracellular//cytoplasmic part//membrane part//intracellular organelle//cell//plasma membrane//cell periphery//integral component of membrane//organelle//intrinsic component of membrane//cytoplasm//intracellular part//cell part//membrane	GO:0008855//GO:0004527//GO:0031386//GO:0022857//GO:0016881//GO:0016874//GO:0015075//GO:0003674//GO:0016758//GO:0016788//GO:0004536//GO:0004518//GO:0008378//GO:0022891//GO:0022890//GO:0005215//GO:0022892//GO:0046873//GO:0016796//GO:0008324//GO:0016787//GO:0016740//GO:0004529//GO:0016895//GO:0003824//GO:0016757//GO:0016879
AAEL000384	supercont1.7	+	32008	33151	1020	2	0	0	0	0	0	0	0	3	0.0988483	0	0	0	0	0	0	0	0.140144	0.0329494	0	0.0467148	0	0.717416	#NAME?	0.841	1	FALSE	0	0.798036	#NAME?	0.71034	1	FALSE	0.762268	0.729615	0.063164	1	1	FALSE	GO:0051179//GO:0044710//GO:0043436//GO:0008152//GO:0044699//GO:0044238//GO:1901605//GO:1901564//GO:0006520//GO:0044281//GO:0006810//GO:0008150//GO:0006525//GO:0009987//GO:0009064//GO:1902578//GO:0006807//GO:0051234//GO:0019752//GO:0044237//GO:0055085//GO:0044765//GO:0006082//GO:0071704//GO:0044763	localization//single-organism metabolic process//oxoacid metabolic process//metabolic process//single-organism process//primary metabolic process//alpha-amino acid metabolic process//organonitrogen compound metabolic process//cellular amino acid metabolic process//small molecule metabolic process//transport//biological_process//arginine metabolic process//cellular process//glutamine family amino …	GO:0044425//GO:0016020//GO:0005575//GO:0031224//GO:0016021	membrane part//membrane//cellular_component//intrinsic component of membrane//integral component of membrane	GO:0009015//GO:0003824//GO:0016813//GO:0003674//GO:0016810//GO:0016787
AAEL000385	supercont1.7	+	2664557	2666748	2010	219	166	134	121	142	138	167	146	188	5.80766	4.57223	3.85653	4.02009	3.35245	3.21141	4.48619	3.91521	4.71227	4.74547	3.52798	4.37122	126.374	181.838	-0.52496	0.14513	0.84896	FALSE	135.422	160.845	-0.24821	0.45254	0.92067	FALSE	153.505	184.855	-0.26811	0.47024	1	FALSE	--	--	--	--	GO:0003674//GO:1901363//GO:0005488//GO:0003723//GO:0003676//GO:0097159
AAEL000386	supercont1.7	+	2040955	2075310	6520	1360	1440	903	1182	1760	1612	1154	1110	1412	10.5155	11.5642	7.57729	11.4499	12.1149	10.9375	9.0386	8.6788	10.3191	9.88568	11.5008	9.3455	1419.99	1274.99	0.15539	0.54625	1	FALSE	1521.46	1180.58	0.36597	0.138	0.57958	FALSE	1126.7	1295.25	-0.20114	0.46416	1	FALSE	--	--	--	--	GO:0003824//GO:0005543//GO:0005515//GO:0016740//GO:0005488//GO:0043168//GO:0005198//GO:0043167//GO:0035091//GO:0016773//GO:0008289//GO:0016772//GO:0003674
AAEL000387	supercont1.7	+	427514	428943	1255	1	1	1	2	2	0	2	2	0	0.0401694	0.0417214	0.0435943	0.100651	0.0715224	0	0.0813822	0.0812402	0	0.0418284	0.0573912	0.0542074	1.26672	1.06172	0.25469	1	1	FALSE	1.35985	1.42457	-0.067071	1	1	FALSE	1.35899	1.07989	0.33166	1	1	FALSE	GO:0051649//GO:0051179//GO:0046907//GO:1902578//GO:0048193//GO:0006810//GO:0022610//GO:1902582//GO:0044699//GO:0007155//GO:0008150//GO:0051234//GO:0016192//GO:0044765//GO:0051641	establishment of localization in cell//localization//intracellular transport//single-organism localization//Golgi vesicle transport//transport//biological adhesion//single-organism intracellular transport//single-organism process//cell adhesion//biological_process//establishment of localization//vesicle-mediated transport//single-organism transport//cellular localization	GO:0016020//GO:0005575	membrane//cellular_component	GO:0005515//GO:0005488//GO:0003674
AAEL000388	supercont1.7	-	4386853	4416525	4085	338	778	320	793	1103	745	594	302	841	4.17123	9.97217	4.2858	12.2607	12.1182	8.06795	7.4257	3.76877	9.80976	6.14306	10.8156	7.00141	824.172	476.125	0.79161	0.0078527	0.14148	FALSE	883.406	533.957	0.72635	0.011036	0.12695	FALSE	509.685	482.962	0.077698	0.86979	1	FALSE	GO:0065007//GO:0006139//GO:0006807//GO:0008150//GO:0043038//GO:0010556//GO:0009987//GO:0019219//GO:0043603//GO:0046483//GO:0006520//GO:1901564//GO:0043043//GO:0032774//GO:0044281//GO:0044267//GO:0010467//GO:0006351//GO:0044238//GO:2000112//GO:0043170//GO:0043604//GO:0006725//GO:0044699//GO:0051252//GO:0006399//GO:0044249//GO:1903506//GO:0009059//GO:0008152//GO:0006355//GO:0043436//GO:0009058//GO:…	biological regulation//nucleobase-containing compound metabolic process//nitrogen compound metabolic process//biological_process//amino acid activation//regulation of macromolecule biosynthetic process//cellular process//regulation of nucleobase-containing compound metabolic process//cellular amide metabolic process//heterocycle metabolic process//cellular amino acid metabolic process//organonitr…	GO:0033646//GO:0044215//GO:0043657//GO:0033647//GO:0043656//GO:0018995//GO:0042025//GO:0005575//GO:0033648//GO:0044216//GO:0033643//GO:0044217	host intracellular part//other organism//host cell//host intracellular organelle//intracellular region of host//host//host cell nucleus//cellular_component//host intracellular membrane-bounded organelle//other organism cell//host cell part//other organism part	GO:0030554//GO:0043168//GO:0000166//GO:0032549//GO:0001071//GO:0043167//GO:0001883//GO:0001882//GO:0032555//GO:0032559//GO:0003824//GO:1901363//GO:0032550//GO:0016875//GO:0097159//GO:0017076//GO:1901265//GO:0035639//GO:0036094//GO:0032553//GO:0005488//GO:0016876//GO:0097367//GO:0005524//GO:0004812//GO:0003700//GO:0016874//GO:0003674
AAEL000389	supercont1.7	-	187195	225704	2382	0	0	0	2	0	0	0	0	0	0	0	0	0.05303	0	0	0	0	0	0	0.0176767	0	0.723494	0	Inf	0.87469	1	FALSE	0.777189	0	Inf	0.79807	1	FALSE	0	0	NA	NA	NA	NA	GO:0071704//GO:0008150//GO:0008152//GO:0044238//GO:0005975	organic substance metabolic process//biological_process//metabolic process//primary metabolic process//carbohydrate metabolic process	GO:0005622//GO:0032991//GO:0005575//GO:0005623//GO:0005737//GO:0044464//GO:1902494//GO:0044424//GO:0009341//GO:0043234	intracellular//macromolecular complex//cellular_component//cell//cytoplasm//cell part//catalytic complex//intracellular part//beta-galactosidase complex//protein complex	GO:0003674//GO:0004553//GO:0016787//GO:0015925//GO:0004565//GO:0016798//GO:0033925//GO:0003824
AAEL000390	supercont1.7	+	1973912	1977238	1572	29	40	27	26	35	18	51	25	61	0.930004	1.33232	0.939691	1.04461	0.999243	0.506546	1.65676	0.810722	1.84898	1.06734	0.850133	1.43882	24.6554	33.0715	-0.42369	0.51103	1	FALSE	26.4348	42.5045	-0.68517	0.16088	0.62479	FALSE	40.5708	33.6001	0.27197	0.56476	1	FALSE	GO:0008152//GO:0008150	metabolic process//biological_process	GO:0005634//GO:0043229//GO:0044424//GO:0044464//GO:0005575//GO:0005622//GO:0005623//GO:0043227//GO:0043226//GO:0043231	nucleus//intracellular organelle//intracellular part//cell part//cellular_component//intracellular//cell//membrane-bounded organelle//organelle//intracellular membrane-bounded organelle	GO:0003824//GO:0043169//GO:0016757//GO:0016758//GO:0046872//GO:0043167//GO:0005488//GO:0008270//GO:0046914//GO:0016740//GO:0003674
AAEL000391	supercont1.7	+	4706387	4707700	1185	0	0	0	0	1	0	0	0	1	0	0	0	0	0.0378737	0	0	0	0.0402102	0	0.0126246	0.0134034	0.271614	0	Inf	1	1	FALSE	0.291333	0.266012	0.13118	1	1	FALSE	0.254089	0	Inf	1	1	FALSE	GO:0007606//GO:0008150//GO:0032501//GO:0050909//GO:0007600//GO:0044699//GO:0050877//GO:0003008//GO:0007608//GO:0044707	sensory perception of chemical stimulus//biological_process//multicellular organismal process//sensory perception of taste//sensory perception//single-organism process//neurological system process//system process//sensory perception of smell//single-multicellular organism process	GO:0016020//GO:0044425//GO:0016021//GO:0031224//GO:0005575	membrane//membrane part//integral component of membrane//intrinsic component of membrane//cellular_component	GO:0004888//GO:0004984//GO:0004872//GO:0004871//GO:0038023//GO:0005488//GO:0005549//GO:0060089//GO:0003674
AAEL000392	supercont1.7	-	4371240	4373321	2020	0	0	0	1	0	0	0	0	0	0	0	0	0.0316903	0	0	0	0	0	0	0.0105634	0	0.361747	0	Inf	1	1	FALSE	0.388595	0	Inf	0.99812	1	FALSE	0	0	NA	NA	NA	NA	GO:0005975//GO:0071704//GO:0008152//GO:0044238//GO:0008150	carbohydrate metabolic process//organic substance metabolic process//metabolic process//primary metabolic process//biological_process	--	--	GO:0005488//GO:0043169//GO:0003824//GO:0003674//GO:0043167
AAEL000393	supercont1.7	-	3240745	3252885	597	51	108	43	100	244	119	154	138	177	4.30661	9.47221	3.94065	10.5793	18.343	8.81803	13.1731	11.7839	14.1271	5.90649	12.5801	13.0281	140.419	66.9617	1.0683	0.021276	0.28488	FALSE	150.502	150.592	-0.00086085	0.86706	1	FALSE	143.719	67.9214	1.0813	0.0085467	0.20966	FALSE	GO:0050896//GO:0044699//GO:0023052//GO:0009987//GO:0008150//GO:0065007//GO:0007154//GO:0051716//GO:0044700//GO:0050789//GO:0007165//GO:0050794//GO:0035556//GO:0044763	response to stimulus//single-organism process//signaling//cellular process//biological_process//biological regulation//cell communication//cellular response to stimulus//single organism signaling//regulation of biological process//signal transduction//regulation of cellular process//intracellular signal transduction//single-organism cellular process	--	--	--
AAEL000394	supercont1.7	-	2003098	2004130	930	149	169	151	123	182	172	227	121	293	8.07686	9.51494	8.88316	8.35324	8.78303	8.18171	12.4648	6.63265	15.012	8.82499	8.43933	11.3698	148.811	164.709	-0.14644	0.74763	1	FALSE	159.441	198.662	-0.3173	0.26636	0.76822	FALSE	189.625	167.475	0.1792	0.47478	1	FALSE	--	--	--	--	GO:0003674//GO:0005515//GO:0005488
AAEL000395	supercont1.7	+	4679207	4871613	2122	242	485	315	363	470	489	408	470	633	6.09383	12.6847	8.60835	11.4518	10.5363	10.8055	10.4073	11.9679	15.0659	9.12896	10.9312	12.4804	415.004	356.479	0.21931	0.48885	1	FALSE	444.647	482.96	-0.11924	0.66998	1	FALSE	460.925	362.096	0.34816	0.2826	1	FALSE	GO:0006807//GO:0006139//GO:0043401//GO:0065007//GO:0019219//GO:0009987//GO:0046483//GO:0008150//GO:0010556//GO:0014070//GO:0032774//GO:0006351//GO:0010467//GO:0071407//GO:2000112//GO:0043170//GO:0044238//GO:0023052//GO:0006725//GO:0044699//GO:0071396//GO:0051252//GO:0009059//GO:0006355//GO:0008152//GO:0044249//GO:1903506//GO:0042221//GO:0009058//GO:0050896//GO:0010468//GO:1901360//GO:0034641//GO:…	nitrogen compound metabolic process//nucleobase-containing compound metabolic process//steroid hormone mediated signaling pathway//biological regulation//regulation of nucleobase-containing compound metabolic process//cellular process//heterocycle metabolic process//biological_process//regulation of macromolecule biosynthetic process//response to organic cyclic compound//RNA biosynthetic process/…	GO:0044424//GO:0044464//GO:0005634//GO:0043229//GO:0005623//GO:0043227//GO:0043226//GO:0043231//GO:0005575//GO:0005622	intracellular part//cell part//nucleus//intracellular organelle//cell//membrane-bounded organelle//organelle//intracellular membrane-bounded organelle//cellular_component//intracellular	GO:0001071//GO:0046872//GO:0043167//GO:0003677//GO:0043169//GO:0003676//GO:1901363//GO:0097159//GO:0043565//GO:0005488//GO:0008270//GO:0046914//GO:0003700//GO:0003674
AAEL000396	supercont1.7	+	1982439	1984895	2392	65	58	25	34	62	35	60	39	83	1.36991	1.26961	0.571811	0.89774	1.16329	0.6473	1.28095	0.831166	1.65338	1.07044	0.902775	1.25516	40.3073	50.2522	-0.31814	0.54858	1	FALSE	43.2035	56.6997	-0.39219	0.37378	0.86501	FALSE	54.1191	51.0162	0.085182	0.85504	1	FALSE	--	--	--	--	GO:0005488//GO:0005515//GO:0003674
AAEL000397	supercont1.7	-	2017090	2025360	1447	51	143	56	59	96	37	87	53	128	1.77681	5.17451	2.11735	2.57523	2.97755	1.13118	3.07039	1.8672	4.21498	3.02289	2.22799	3.05086	59.2241	82.3414	-0.47544	0.29399	1	FALSE	63.5053	82.8775	-0.3841	0.30366	0.80563	FALSE	79.108	83.5019	-0.077985	0.8021	1	FALSE	GO:0044765//GO:0098771//GO:0072507//GO:0072503//GO:0044763//GO:0006811//GO:0044699//GO:0048878//GO:0065008//GO:0019725//GO:0055065//GO:0051179//GO:0051234//GO:1902578//GO:0030003//GO:0065007//GO:0006873//GO:0055082//GO:0042592//GO:0009987//GO:0008150//GO:0006874//GO:0006810//GO:0006875//GO:0055074//GO:0055080//GO:0050801	single-organism transport//inorganic ion homeostasis//divalent inorganic cation homeostasis//cellular divalent inorganic cation homeostasis//single-organism cellular process//ion transport//single-organism process//chemical homeostasis//regulation of biological quality//cellular homeostasis//metal ion homeostasis//localization//establishment of localization//single-organism localization//cellular…	GO:0031224//GO:0005575//GO:0016021//GO:0044425//GO:0016020	intrinsic component of membrane//cellular_component//integral component of membrane//membrane part//membrane	GO:0022803//GO:0022836//GO:0015276//GO:0022838//GO:0015075//GO:0003674//GO:0005219//GO:0046873//GO:0022857//GO:0005218//GO:0008324//GO:0015278//GO:0005216//GO:0005217//GO:0072509//GO:0015267//GO:0022834//GO:0022890//GO:0022891//GO:0022892//GO:0005215//GO:0005262//GO:0015085//GO:0005261
AAEL000398	supercont1.7	-	3402619	3795976	3024	0	1	3	3	0	0	3	1	5	0	0.0173149	0.0542767	0.0626574	0	0	0.050662	0.0168579	0.0787848	0.0238639	0.0208858	0.0487682	1.08524	1.54172	-0.50653	0.9646	1	FALSE	1.16578	2.69393	-1.2084	0.55232	0.97183	FALSE	2.57178	1.57393	0.7084	0.72048	1	FALSE	GO:0051704//GO:0009405//GO:0008150	multi-organism process//pathogenesis//biological_process	GO:0005575//GO:0005576	cellular_component//extracellular region	GO:0005488//GO:0008200//GO:0016248//GO:0005515//GO:0003674//GO:0098772//GO:0016247//GO:0019870//GO:0015459
AAEL000399	supercont1.7	+	4639914	4646177	1597	624	567	611	587	738	800	1000	1011	1082	19.6979	18.59	20.932	23.2149	20.7399	22.1607	31.977	32.2724	32.2832	19.74	22.0385	32.1775	668.063	640.895	0.059896	0.71758	1	FALSE	715.764	1004.36	-0.48872	0.076489	0.4339	FALSE	958.475	651.985	0.5559	0.050052	0.59995	FALSE	GO:0015849//GO:0006865//GO:0055085//GO:0034220//GO:0071702//GO:1903825//GO:0046942//GO:0044763//GO:0051179//GO:0006820//GO:0006810//GO:0009987//GO:0003333//GO:1902578//GO:0015711//GO:0044765//GO:0098656//GO:0071705//GO:0044699//GO:0006811//GO:0008150//GO:0051234	organic acid transport//amino acid transport//transmembrane transport//ion transmembrane transport//organic substance transport//organic acid transmembrane transport//carboxylic acid transport//single-organism cellular process//localization//anion transport//transport//cellular process//amino acid transmembrane transport//single-organism localization//organic anion transport//single-organism tran…	--	--	--
AAEL000400	supercont1.7	-	3240457	3240723	267	28	52	28	51	97	37	70	53	101	5.28672	10.1975	5.73747	12.064	16.3048	6.13041	13.3884	10.1193	18.0246	7.0739	11.4998	13.8441	56.6017	36.5361	0.63152	0.22045	0.99768	FALSE	60.6879	70.1567	-0.20917	0.62995	1	FALSE	66.962	37.0926	0.85221	0.069748	0.70905	FALSE	--	--	--	--	--
AAEL000401	supercont1.7	-	4673117	4673760	644	0	0	0	0	0	0	0	0	0	0	0	0	0	0	0	0	0	0	0	0	0	0	0	NA	NA	NA	NA	0	0	NA	NA	NA	NA	0	0	NA	NA	NA	NA	GO:0043412//GO:0051641//GO:0061640//GO:0044765//GO:0044403//GO:0022607//GO:0044237//GO:0071704//GO:0050789//GO:0040011//GO:0034645//GO:0031323//GO:0031331//GO:0032506//GO:0000281//GO:0006886//GO:0050794//GO:0019069//GO:0032446//GO:0070647//GO:0009059//GO:0008152//GO:0048518//GO:0015031//GO:0006914//GO:0044238//GO:0008104//GO:0043170//GO:0006811//GO:0009894//GO:0044699//GO:0090529//GO:0022402//GO:…	macromolecule modification//cellular localization//cytoskeleton-dependent cytokinesis//single-organism transport//symbiosis, encompassing mutualism through parasitism//cellular component assembly//cellular metabolic process//organic substance metabolic process//regulation of biological process//locomotion//cellular macromolecule biosynthetic process//regulation of cellular metabolic process//posi…	GO:0012505//GO:0005622//GO:0005575//GO:0005783//GO:0043227//GO:0043231//GO:0043229//GO:0044444//GO:0044425//GO:0005737//GO:0031224//GO:0043226//GO:0016021//GO:0005623//GO:0005886//GO:0071944//GO:0044464//GO:0016020//GO:0044424	endomembrane system//intracellular//cellular_component//endoplasmic reticulum//membrane-bounded organelle//intracellular membrane-bounded organelle//intracellular organelle//cytoplasmic part//membrane part//cytoplasm//intrinsic component of membrane//organelle//integral component of membrane//cell//plasma membrane//cell periphery//cell part//membrane//intracellular part	GO:0016874//GO:0003674//GO:0015075//GO:0022857//GO:0031386//GO:0016881//GO:0008855//GO:0004527//GO:0022891//GO:0022890//GO:0022892//GO:0005215//GO:0004518//GO:0016788//GO:0004536//GO:0004529//GO:0008324//GO:0016787//GO:0016796//GO:0046873//GO:0016879//GO:0003824//GO:0016895
AAEL000402	supercont1.7	+	2396486	2405621	1302	100	90	56	120	157	184	95	69	82	3.87194	3.61938	2.35316	5.82108	5.41183	6.25181	3.72611	2.70161	3.00094	3.28149	5.82824	3.14289	144.764	84.8841	0.77014	0.04373	0.4481	FALSE	155.081	79.4312	0.96525	0.0047527	0.06973	FALSE	75.8045	86.2376	-0.18603	0.62651	1	FALSE	GO:0009058//GO:1901360//GO:0044249//GO:1903506//GO:0006725//GO:0051252//GO:0006351//GO:0032774//GO:0009987//GO:0046483//GO:0065007//GO:0006807//GO:0044271//GO:2001141//GO:0080090//GO:0016070//GO:0044260//GO:1901362//GO:0060255//GO:0031326//GO:0019438//GO:0006259//GO:0019222//GO:0034641//GO:1901576//GO:0090304//GO:0010468//GO:0009059//GO:0008152//GO:0006355//GO:0044238//GO:2000112//GO:0043170//GO:…	biosynthetic process//organic cyclic compound metabolic process//cellular biosynthetic process//regulation of nucleic acid-templated transcription//cellular aromatic compound metabolic process//regulation of RNA metabolic process//transcription, DNA-templated//RNA biosynthetic process//cellular process//heterocycle metabolic process//biological regulation//nitrogen compound metabolic process//cel…	GO:0044464//GO:0044424//GO:0043226//GO:0005623//GO:0043229//GO:0005634//GO:0005622//GO:0005575//GO:0043231//GO:0043227	cell part//intracellular part//organelle//cell//intracellular organelle//nucleus//intracellular//cellular_component//intracellular membrane-bounded organelle//membrane-bounded organelle	GO:0097159//GO:0003676//GO:0003677//GO:0001071//GO:0005488//GO:1901363//GO:0003674//GO:0003700//GO:0043565
AAEL000403	supercont1.7	-	4601128	4633317	2496	18	53	11	20	17	12	38	10	66	0.363553	1.11182	0.241114	0.506079	0.305675	0.212684	0.777467	0.20424	1.25995	0.572161	0.34148	0.747219	15.6814	26.1037	-0.7352	0.22868	1	FALSE	16.8144	33.8018	-1.0074	0.12715	0.55553	FALSE	32.2706	26.43	0.28804	0.74788	1	FALSE	GO:0006139//GO:0019219//GO:0008150//GO:0010556//GO:0010467//GO:2000112//GO:0043170//GO:0044238//GO:0009059//GO:0006355//GO:0008152//GO:0010468//GO:0097659//GO:0050794//GO:0009889//GO:0050789//GO:0034645//GO:0034654//GO:0051171//GO:0071704//GO:0031323//GO:0051090//GO:0044237//GO:0018130//GO:0006807//GO:0065007//GO:0009987//GO:0046483//GO:0032774//GO:0065009//GO:0006351//GO:0006725//GO:0051252//GO:…	nucleobase-containing compound metabolic process//regulation of nucleobase-containing compound metabolic process//biological_process//regulation of macromolecule biosynthetic process//gene expression//regulation of cellular macromolecule biosynthetic process//macromolecule metabolic process//primary metabolic process//macromolecule biosynthetic process//regulation of transcription, DNA-templated/…	GO:0005634//GO:0043229//GO:0043227//GO:0043231//GO:0005575//GO:0005622//GO:0044424//GO:0044464//GO:0005623//GO:0043226	nucleus//intracellular organelle//membrane-bounded organelle//intracellular membrane-bounded organelle//cellular_component//intracellular//intracellular part//cell part//cell//organelle	GO:1901363//GO:0003674//GO:0003677//GO:0003676//GO:0097159//GO:0005488//GO:0005515
AAEL000404	supercont1.7	-	4646773	4663994	2329	74	164	64	81	100	47	134	110	204	1.60178	3.68703	1.50343	2.19659	1.92702	0.892744	2.93818	2.40773	4.17364	2.26408	1.67212	3.17318	71.4598	99.9034	-0.4834	0.18581	0.94082	FALSE	76.6279	140.437	-0.87398	0.01089	0.12579	FALSE	134.041	101.327	0.40366	0.33344	1	FALSE	GO:0044237//GO:0071704//GO:0034641//GO:1901360//GO:0008152//GO:0006725//GO:0044238//GO:0008150//GO:0046483//GO:0009987//GO:0006807//GO:0006139	cellular metabolic process//organic substance metabolic process//cellular nitrogen compound metabolic process//organic cyclic compound metabolic process//metabolic process//cellular aromatic compound metabolic process//primary metabolic process//biological_process//heterocycle metabolic process//cellular process//nitrogen compound metabolic process//nucleobase-containing compound metabolic process	GO:0005622//GO:0005575//GO:0043231//GO:0043226//GO:0043227//GO:0005623//GO:0043229//GO:0005634//GO:0044464//GO:0044424	intracellular//cellular_component//intracellular membrane-bounded organelle//organelle//membrane-bounded organelle//cell//intracellular organelle//nucleus//cell part//intracellular part	GO:0003674//GO:0003678//GO:0008026//GO:0005524//GO:0097367//GO:0005488//GO:0016818//GO:0032553//GO:0016787//GO:0036094//GO:0016817//GO:0035639//GO:0017076//GO:1901265//GO:0032550//GO:0097159//GO:0004003//GO:0004386//GO:1901363//GO:0003676//GO:0003824//GO:0032559//GO:0032555//GO:0016462//GO:0008094//GO:0003677//GO:0001883//GO:0042623//GO:0001882//GO:0043167//GO:0070035//GO:0032549//GO:0043168//GO:…
AAEL000405	supercont1.7	+	1900330	1950235	7683	84	87	70	110	85	63	91	94	86	0.551173	0.592912	0.498472	0.904263	0.496528	0.362751	0.604858	0.623708	0.533362	0.547519	0.587847	0.587309	82.9816	84.1647	-0.020425	0.93554	1	FALSE	88.9803	88.8543	0.002044	1	1	FALSE	84.7916	85.5556	-0.012942	0.951	1	FALSE	GO:0005975//GO:0006996//GO:0009987//GO:0071840//GO:0065007//GO:0043067//GO:0010941//GO:0010942//GO:0044763//GO:0006915//GO:0048522//GO:0007031//GO:0044699//GO:0044238//GO:0043065//GO:0048518//GO:0008152//GO:0008150//GO:0012501//GO:0016043//GO:0043068//GO:0050794//GO:0016265//GO:0042981//GO:0050789//GO:0008219//GO:0071704	carbohydrate metabolic process//organelle organization//cellular process//cellular component organization or biogenesis//biological regulation//regulation of programmed cell death//regulation of cell death//positive regulation of cell death//single-organism cellular process//apoptotic process//positive regulation of cellular process//peroxisome organization//single-organism process//primary metab…	GO:0031090//GO:0044422//GO:0031300//GO:0005778//GO:0044424//GO:0044446//GO:0098588//GO:0016020//GO:0044464//GO:0031231//GO:0031224//GO:0019012//GO:0005737//GO:0042579//GO:0031301//GO:0005623//GO:0016021//GO:0043226//GO:0098805//GO:0044425//GO:0044444//GO:0043229//GO:0031903//GO:0005575//GO:0005622//GO:0005779//GO:0005777//GO:0044423//GO:0044438//GO:0044439//GO:0043231//GO:0019028//GO:0043227	organelle membrane//organelle part//intrinsic component of organelle membrane//peroxisomal membrane//intracellular part//intracellular organelle part//bounding membrane of organelle//membrane//cell part//intrinsic component of peroxisomal membrane//intrinsic component of membrane//virion//cytoplasm//microbody//integral component of organelle membrane//cell//integral component of membrane//organel…	GO:0003824//GO:0043169//GO:0046872//GO:0046914//GO:0005515//GO:0008270//GO:0005488//GO:0016798//GO:0016787//GO:0004553//GO:0043167//GO:0003674
AAEL000406	supercont1.7	-	2065587	2067938	2149	282	201	158	142	116	184	204	275	412	6.61534	4.89736	4.02248	4.17335	2.42258	3.78774	4.84771	6.5235	9.13514	5.17839	3.46122	6.83545	141.587	224.429	-0.66458	0.076276	0.61474	FALSE	151.686	282.344	-0.89637	0.0050145	0.072458	FALSE	269.471	228.142	0.2402	0.42286	1	FALSE	--	--	--	--	--
AAEL000407	supercont1.8	+	2470340	2470827	341	104	127	99	87	177	120	122	106	114	15.3751	19.5008	15.8838	16.1138	23.2956	15.5677	18.2704	15.8466	15.9296	16.9199	18.3257	16.6822	117.838	114.847	0.037092	0.84228	1	FALSE	126.272	111.04	0.18545	0.48469	0.94115	FALSE	105.968	116.731	-0.13957	0.69844	1	FALSE	GO:0008150//GO:0010556//GO:0009987//GO:0019219//GO:0010557//GO:0046483//GO:0065007//GO:0006807//GO:0006139//GO:0006357//GO:0006351//GO:0010467//GO:0032774//GO:0006725//GO:0044699//GO:0051252//GO:0045893//GO:0044238//GO:0023052//GO:0009891//GO:2000112//GO:0043170//GO:0048518//GO:0009058//GO:0050896//GO:0010628//GO:0010468//GO:1901360//GO:1903506//GO:0044249//GO:0031325//GO:0009059//GO:0008152//GO:…	biological_process//regulation of macromolecule biosynthetic process//cellular process//regulation of nucleobase-containing compound metabolic process//positive regulation of macromolecule biosynthetic process//heterocycle metabolic process//biological regulation//nitrogen compound metabolic process//nucleobase-containing compound metabolic process//regulation of transcription from RNA polymerase…	GO:0044424//GO:0044428//GO:0043233//GO:0044446//GO:0044464//GO:0044422//GO:0043229//GO:0005634//GO:0016604//GO:0044451//GO:0070013//GO:0005623//GO:0043226//GO:0043231//GO:0031981//GO:0043227//GO:0005654//GO:0005575//GO:0016607//GO:0005622//GO:0031974	intracellular part//nuclear part//organelle lumen//intracellular organelle part//cell part//organelle part//intracellular organelle//nucleus//nuclear body//nucleoplasm part//intracellular organelle lumen//cell//organelle//intracellular membrane-bounded organelle//nuclear lumen//membrane-bounded organelle//nucleoplasm//cellular_component//nuclear speck//intracellular//membrane-enclosed lumen	GO:0003712//GO:0000988//GO:0003713//GO:0000989//GO:0003674
AAEL000408	supercont1.8	-	937884	941349	3261	4	10	5	8	14	17	16	16	20	0.061837	0.160565	0.0838867	0.154943	0.192678	0.23062	0.25056	0.250123	0.292236	0.102096	0.192747	0.264306	12.121	6.36821	0.92855	0.42469	1	FALSE	12.9813	16.7168	-0.36486	0.66381	1	FALSE	15.9537	6.46292	1.3036	0.16092	0.97842	FALSE	--	--	--	--	GO:0046872//GO:0043167//GO:1901363//GO:0003676//GO:0097159//GO:0043169//GO:0003674//GO:0008270//GO:0005488//GO:0046914
AAEL000410	supercont1.8	-	413564	415012	960	1244	1358	1071	1020	1626	1359	1430	974	1335	65.3264	74.068	61.0368	67.1061	76.016	62.6249	76.069	51.7216	66.262	66.8104	68.5823	64.6842	1244.26	1280.57	-0.041501	0.95726	1	FALSE	1333.25	1197.45	0.15498	0.50195	0.94922	FALSE	1142.82	1301.66	-0.18775	0.54607	1	FALSE	GO:0006810//GO:0051234//GO:0008150//GO:0051179	transport//establishment of localization//biological_process//localization	GO:0016020//GO:0044425//GO:0016021//GO:0005575//GO:0031224	membrane//membrane part//integral component of membrane//cellular_component//intrinsic component of membrane	--
AAEL000411	supercont1.8	+	925484	939098	1526	0	0	0	2	0	2	0	0	1	0	0	0	0.0827768	0	0.0579795	0	0	0.0312248	0	0.0469187	0.0104083	1.36166	0	Inf	0.63272	1	FALSE	1.45883	0.266012	2.4552	0.70172	1	FALSE	0.254089	0	Inf	1	1	FALSE	--	--	--	--	--
AAEL000412	supercont1.8	-	1086598	1088080	1412	504	426	372	359	441	451	328	237	408	17.9943	15.7971	14.4139	16.058	14.0171	14.13	11.8627	8.55654	13.7683	16.0684	14.735	11.3958	393.555	457.628	-0.21761	0.49998	1	FALSE	421.693	306.991	0.45799	0.1225	0.54789	FALSE	293.003	465.298	-0.66724	0.046623	0.57733	FALSE	GO:0006996//GO:0009058//GO:0044710//GO:0071840//GO:0007010//GO:0009987//GO:0006629//GO:0008152//GO:0044238//GO:0044699//GO:0016043//GO:0008150//GO:0071704	organelle organization//biosynthetic process//single-organism metabolic process//cellular component organization or biogenesis//cytoskeleton organization//cellular process//lipid metabolic process//metabolic process//primary metabolic process//single-organism process//cellular component organization//biological_process//organic substance metabolic process	--	--	GO:0003779//GO:0003824//GO:0005488//GO:0016740//GO:0005515//GO:0016787//GO:0008374//GO:0016788//GO:0003674//GO:0016746//GO:0016747//GO:0008092
AAEL000413	supercont1.8	+	2818795	2838727	1945	0	0	0	0	0	0	0	0	0	0	0	0	0	0	0	0	0	0	0	0	0	0	0	NA	NA	NA	NA	0	0	NA	NA	NA	NA	0	0	NA	NA	NA	NA	--	--	GO:0016020//GO:0005575	membrane//cellular_component	GO:0004872//GO:0004871//GO:0038023//GO:0004970//GO:0022803//GO:0005231//GO:0015276//GO:0022836//GO:0022838//GO:0005216//GO:0022834//GO:0015267//GO:0022857//GO:0008066//GO:0005234//GO:0003674//GO:0060089//GO:0015075//GO:0004888//GO:0005230//GO:0022891//GO:0005215//GO:0022892
AAEL000414	supercont1.8	-	1668235	1696676	660	0	4	3	3	0	0	1	1	0	0	0.317335	0.248686	0.287085	0	0	0.0773747	0.0772397	0	0.188674	0.095695	0.0515381	1.08524	2.3927	-1.1406	0.69414	1	FALSE	1.16578	0.712284	0.71078	0.98482	1	FALSE	0.679496	2.4309	-1.839	0.51116	1	FALSE	GO:0044249//GO:1903506//GO:0008152//GO:0006355//GO:0009059//GO:0010468//GO:1901360//GO:0009058//GO:0044238//GO:0043170//GO:2000112//GO:0051252//GO:0006725//GO:0032774//GO:0006351//GO:0010467//GO:0065007//GO:0006807//GO:0006139//GO:0010556//GO:0008150//GO:0046483//GO:0009987//GO:0019219//GO:2001141//GO:0080090//GO:0018130//GO:0044271//GO:1901362//GO:0044260//GO:0016070//GO:0044237//GO:0071704//GO:…	cellular biosynthetic process//regulation of nucleic acid-templated transcription//metabolic process//regulation of transcription, DNA-templated//macromolecule biosynthetic process//regulation of gene expression//organic cyclic compound metabolic process//biosynthetic process//primary metabolic process//macromolecule metabolic process//regulation of cellular macromolecule biosynthetic process//re…	--	--	GO:1901363//GO:0003676//GO:0097159//GO:0003677//GO:0003674//GO:0005488//GO:0043565
AAEL000415	supercont1.8	+	3686991	3701010	2180	189	503	192	228	333	218	473	358	632	4.37064	12.0813	4.81857	6.60559	6.85557	4.42383	11.0802	8.37165	13.8139	7.09017	5.96166	11.0886	242.486	290.993	-0.26309	0.41153	1	FALSE	259.912	460.583	-0.82544	0.0034092	0.054326	FALSE	439.6	295.084	0.57507	0.097534	0.82749	FALSE	GO:0008152//GO:0008150	metabolic process//biological_process	--	--	GO:0003674//GO:0003824
AAEL000416	supercont1.8	-	316539	373000	13605	237	609	180	314	417	246	428	241	657	0.878191	2.3438	0.723848	1.45769	1.3756	0.799899	1.60653	0.903032	2.30102	1.31528	1.21106	1.60353	305.346	333.247	-0.12615	0.64065	1	FALSE	327.346	407.354	-0.31547	0.25663	0.75753	FALSE	388.837	337.721	0.20333	0.73685	1	FALSE	GO:0008150//GO:0043603//GO:0009987//GO:0006807//GO:0044267//GO:0010467//GO:1901564//GO:0043043//GO:0044238//GO:0043604//GO:0043170//GO:0009058//GO:0044249//GO:0009059//GO:0008152//GO:0019538//GO:1901576//GO:0034641//GO:0006412//GO:0071704//GO:0006518//GO:0034645//GO:0044237//GO:0044260//GO:0044271//GO:1901566	biological_process//cellular amide metabolic process//cellular process//nitrogen compound metabolic process//cellular protein metabolic process//gene expression//organonitrogen compound metabolic process//peptide biosynthetic process//primary metabolic process//amide biosynthetic process//macromolecule metabolic process//biosynthetic process//cellular biosynthetic process//macromolecule biosynthe…	GO:0044424//GO:0044464//GO:0044444//GO:0030529//GO:0043229//GO:0005840//GO:0005623//GO:1990904//GO:0043226//GO:0043232//GO:0005575//GO:0043228//GO:0032991//GO:0005737//GO:0005622	intracellular part//cell part//cytoplasmic part//intracellular ribonucleoprotein complex//intracellular organelle//ribosome//cell//ribonucleoprotein complex//organelle//intracellular non-membrane-bounded organelle//cellular_component//non-membrane-bounded organelle//macromolecular complex//cytoplasm//intracellular	GO:0005198//GO:0016758//GO:0016757//GO:0003824//GO:0016740//GO:0005515//GO:0005488//GO:0003674//GO:0003735
AAEL000417	supercont1.8	+	2003053	2050613	3310	10766	8377	6474	5798	7712	6557	8023	4904	6926	163.971	132.514	107.009	110.633	104.567	87.6347	123.78	75.5278	99.7032	134.498	100.945	99.6705	6284.32	8952.97	-0.51061	0.058375	0.5326	FALSE	6734.58	6351.59	0.084471	0.71955	1	FALSE	6061.83	9100.55	-0.5862	0.059854	0.66072	FALSE	GO:0044765//GO:0055085//GO:0044763//GO:0051179//GO:0044699//GO:0006810//GO:1902578//GO:0051234//GO:0009987//GO:0008150	single-organism transport//transmembrane transport//single-organism cellular process//localization//single-organism process//transport//single-organism localization//establishment of localization//cellular process//biological_process	GO:0031224//GO:0005575//GO:0016021//GO:0044425//GO:0016020	intrinsic component of membrane//cellular_component//integral component of membrane//membrane part//membrane	GO:0003674//GO:0005488//GO:0008270//GO:0046914//GO:0003676//GO:1901363//GO:0097159//GO:0003677//GO:0043169//GO:0046872//GO:0043167
AAEL000418	supercont1.8	-	2523123	2545249	1274	112	128	100	108	122	123	141	122	181	4.43188	5.26069	4.29442	5.35411	4.2978	4.27105	5.65188	4.88174	6.76961	4.66233	4.64099	5.76774	111.453	118.419	-0.087472	0.83042	1	FALSE	119.432	141.237	-0.24193	0.44863	0.91829	FALSE	134.796	120.365	0.16337	0.6218	1	FALSE	--	--	--	--	--
AAEL000419	supercont1.8	-	3065733	3066473	582	3	10	1	3	5	6	2	0	1	0.259859	0.899661	0.0940049	0.32556	0.38557	0.456065	0.175489	0	0.0818713	0.417842	0.389065	0.0857868	4.35781	4.33209	0.00854	0.97618	1	FALSE	4.66736	0.917599	2.3467	0.239	0.73641	FALSE	0.875927	4.38042	-2.3222	0.23185	1	FALSE	--	--	--	--	GO:0005198//GO:0003674//GO:0042302
AAEL000420	supercont1.8	+	3460332	3467849	3059	2	5	2	3	16	10	12	5	4	0.0329602	0.085584	0.0357704	0.0619405	0.234745	0.144617	0.200329	0.0833249	0.0623067	0.0514382	0.147101	0.11532	8.62189	2.97443	1.5354	0.28808	1	FALSE	9.2353	6.90602	0.4193	0.60911	0.99875	FALSE	6.59027	3.01675	1.1273	0.47703	1	FALSE	GO:0065007//GO:0009987//GO:0050896//GO:0007165//GO:0044763//GO:0019538//GO:0006508//GO:0010646//GO:0051716//GO:0009966//GO:0023051//GO:0008150//GO:0008152//GO:0044238//GO:0023052//GO:0043170//GO:0044699//GO:0071704//GO:0050789//GO:0050794//GO:0007154//GO:0044700//GO:0048583	biological regulation//cellular process//response to stimulus//signal transduction//single-organism cellular process//protein metabolic process//proteolysis//regulation of cell communication//cellular response to stimulus//regulation of signal transduction//regulation of signaling//biological_process//metabolic process//primary metabolic process//signaling//macromolecule metabolic process//single…	GO:0005576//GO:0005575	extracellular region//cellular_component	GO:0003824//GO:0016787//GO:0070011//GO:0004175//GO:0008233//GO:0004197//GO:0003674//GO:0008234
AAEL000421	supercont1.8	+	2547138	2578897	1649	26	128	22	44	51	24	69	48	166	0.794863	4.06435	0.729921	1.68525	1.38805	0.643857	2.13684	1.4839	4.79669	1.86305	1.23905	2.80581	37.4272	54.8608	-0.55169	0.43996	1	FALSE	40.1358	85.1893	-1.0858	0.052152	0.35077	FALSE	81.324	55.4965	0.55128	0.55106	1	FALSE	GO:0018342//GO:0044237//GO:0044260//GO:0097354//GO:0043412//GO:0019538//GO:0071704//GO:0006464//GO:0044238//GO:0043170//GO:0036211//GO:0008152//GO:0008150//GO:0009987//GO:0044267	protein prenylation//cellular metabolic process//cellular macromolecule metabolic process//prenylation//macromolecule modification//protein metabolic process//organic substance metabolic process//cellular protein modification process//primary metabolic process//macromolecule metabolic process//protein modification process//metabolic process//biological_process//cellular process//cellular protein …	--	--	GO:0016740//GO:0016765//GO:0003674//GO:0003824//GO:0008318//GO:0004659
AAEL000422	supercont1.8	-	2460670	2466261	2986	84	179	64	183	185	103	139	54	234	1.41817	3.13881	1.17264	3.87074	2.78059	1.52597	2.37721	0.92191	3.73405	1.90987	2.72577	2.34439	149.314	107.745	0.47072	0.36073	1	FALSE	160.114	128.403	0.31842	0.6577	1	FALSE	122.578	109.26	0.16594	0.74735	1	FALSE	GO:1901360//GO:0008152//GO:0006725//GO:0006461//GO:0044238//GO:0043170//GO:0071822//GO:0044085//GO:0016043//GO:0016072//GO:0010467//GO:0007155//GO:0008150//GO:0046483//GO:0009987//GO:0071840//GO:0006807//GO:0006139//GO:0042254//GO:0022607//GO:0016070//GO:0044237//GO:0044260//GO:0022613//GO:0070271//GO:0043933//GO:0006364//GO:0070206//GO:0071704//GO:0022610//GO:0051259//GO:0034470//GO:0065003//GO:…	organic cyclic compound metabolic process//metabolic process//cellular aromatic compound metabolic process//protein complex assembly//primary metabolic process//macromolecule metabolic process//protein complex subunit organization//cellular component biogenesis//cellular component organization//rRNA metabolic process//gene expression//cell adhesion//biological_process//heterocycle metabolic proce…	GO:0043229//GO:0005634//GO:0044444//GO:0044422//GO:0005730//GO:0044464//GO:0044428//GO:0044424//GO:0044446//GO:0043233//GO:0005737//GO:0005622//GO:0044423//GO:0031974//GO:0012505//GO:0019012//GO:0005575//GO:0005794//GO:0043228//GO:0043231//GO:0043226//GO:0019028//GO:0031981//GO:0043227//GO:0043232//GO:0005623//GO:0070013	intracellular organelle//nucleus//cytoplasmic part//organelle part//nucleolus//cell part//nuclear part//intracellular part//intracellular organelle part//organelle lumen//cytoplasm//intracellular//virion part//membrane-enclosed lumen//endomembrane system//virion//cellular_component//Golgi apparatus//non-membrane-bounded organelle//intracellular membrane-bounded organelle//organelle//viral capsid/…	GO:0003674//GO:0005515//GO:0005488
AAEL000424	supercont1.8	+	1778268	1854492	1784	4668	4683	3184	2976	4391	3792	4101	3663	4216	131.909	137.446	97.6454	105.359	110.465	94.0313	117.392	104.671	112.606	122.333	103.285	111.556	3479.18	4338.05	-0.3183	0.22631	1	FALSE	3728.09	3873.3	-0.055128	0.91161	1	FALSE	3696.42	4407.94	-0.25398	0.34751	1	FALSE	GO:0043170//GO:0044238//GO:0008152//GO:0008150//GO:0006508//GO:0019538//GO:0071704	macromolecule metabolic process//primary metabolic process//metabolic process//biological_process//proteolysis//protein metabolic process//organic substance metabolic process	GO:0044464//GO:0005575//GO:0005622//GO:0005623	cell part//cellular_component//intracellular//cell	GO:0003824//GO:0008238//GO:0003674//GO:0070011//GO:0004177//GO:0008233//GO:0016787
AAEL000425	supercont1.8	+	1052641	1057801	2270	40	90	39	52	60	45	91	62	122	0.888328	2.07596	0.939967	1.44681	1.18626	0.876971	2.04719	1.39236	2.56088	1.30142	1.17001	2.00014	49.4664	56.2326	-0.18496	0.62076	1	FALSE	53.0237	86.0631	-0.69876	0.066278	0.40187	FALSE	82.1443	57.049	0.52596	0.24551	1	FALSE	GO:1901360//GO:0044710//GO:0050896//GO:0006974//GO:0008152//GO:0006950//GO:0044699//GO:0006725//GO:0043170//GO:0006281//GO:0044238//GO:0033554//GO:0046483//GO:0009987//GO:0008150//GO:0006807//GO:0006139//GO:0044237//GO:0051716//GO:0044260//GO:0071704//GO:0090304//GO:0034641//GO:0006259//GO:0044763	organic cyclic compound metabolic process//single-organism metabolic process//response to stimulus//cellular response to DNA damage stimulus//metabolic process//response to stress//single-organism process//cellular aromatic compound metabolic process//macromolecule metabolic process//DNA repair//primary metabolic process//cellular response to stress//heterocycle metabolic process//cellular proces…	--	--	GO:0003824//GO:0004518//GO:0016788//GO:0003674//GO:0016787
AAEL000426	supercont1.8	-	3226286	3243588	1374	0	0	0	0	0	0	2	0	0	0	0	0	0	0	0	0.0743338	0	0	0	0	0.0247779	0	0	NA	NA	NA	NA	0	0.651587	#NAME?	0.8305	1	FALSE	0.621838	0	Inf	0.86168	1	FALSE	--	--	--	--	--
AAEL000427	supercont1.8	+	2238866	2289705	2975	5533	4588	3730	3203	4110	4327	3218	2462	3523	93.759	80.7493	68.5955	67.9991	62.0027	64.3426	55.2385	42.1877	56.4261	81.0346	64.7815	51.2841	3655.68	4850.36	-0.40795	0.12499	0.79178	FALSE	3916.77	2937.1	0.41527	0.10212	0.50025	FALSE	2803.13	4930.82	-0.81479	0.0055876	0.15743	FALSE	GO:0008152//GO:0008150	metabolic process//biological_process	--	--	GO:0003824//GO:0003674//GO:0016740//GO:0016746
AAEL000428	supercont1.8	+	3404783	3430186	1423	2515	2018	2194	2490	3392	2816	2825	3135	3499	89.0989	74.2537	84.3539	110.517	106.981	87.544	101.381	112.31	117.164	82.5689	101.681	110.285	2720.6	2394.64	0.18412	0.36377	1	FALSE	2915.55	3062.79	-0.071079	0.8534	1	FALSE	2922.89	2436.1	0.26282	0.30405	1	FALSE	GO:1901988//GO:0046483//GO:0006586//GO:0090231//GO:1902099//GO:0044248//GO:0009987//GO:0000278//GO:0051444//GO:0008150//GO:0051301//GO:0045930//GO:0048523//GO:1901990//GO:0007059//GO:2001251//GO:0006807//GO:0033044//GO:1901799//GO:0071840//GO:0098813//GO:0044257//GO:0033048//GO:0045841//GO:0016032//GO:0065007//GO:0042176//GO:0032268//GO:0044267//GO:0042430//GO:0033046//GO:1901991//GO:0016043//GO:…	negative regulation of cell cycle phase transition//heterocycle metabolic process//indolalkylamine metabolic process//regulation of spindle checkpoint//regulation of metaphase/anaphase transition of cell cycle//cellular catabolic process//cellular process//mitotic cell cycle//negative regulation of ubiquitin-protein transferase activity//biological_process//cell division//negative regulation of m…	GO:0044428//GO:0044424//GO:0044446//GO:0044464//GO:1902494//GO:0043234//GO:0000151//GO:0044422//GO:0005634//GO:0043229//GO:0005623//GO:0043226//GO:0043231//GO:0005680//GO:0043227//GO:0000152//GO:0005575//GO:0031461//GO:0032991//GO:0005622//GO:1990234	nuclear part//intracellular part//intracellular organelle part//cell part//catalytic complex//protein complex//ubiquitin ligase complex//organelle part//nucleus//intracellular organelle//cell//organelle//intracellular membrane-bounded organelle//anaphase-promoting complex//membrane-bounded organelle//nuclear ubiquitin ligase complex//cellular_component//cullin-RING ubiquitin ligase complex//macro…	GO:0003824//GO:0097159//GO:1901363//GO:0046906//GO:0004833//GO:0016702//GO:0020037//GO:0016491//GO:0051213//GO:0016701//GO:0005488//GO:0003674
AAEL000429	supercont1.8	-	922209	925994	2998	16	68	26	49	48	31	48	25	99	0.269047	1.18763	0.474477	1.03228	0.718564	0.457434	0.817622	0.425102	1.57347	0.643716	0.736093	0.938731	40.6546	35.9315	0.17817	0.9059	1	FALSE	43.5905	51.6355	-0.24435	0.5	0.94862	FALSE	49.2934	36.4266	0.4364	0.50643	1	FALSE	--	--	GO:0016021//GO:0005623//GO:0005886//GO:0071944//GO:0005887//GO:0031224//GO:0044464//GO:0016020//GO:0044459//GO:0031226//GO:0005575//GO:0044425	integral component of membrane//cell//plasma membrane//cell periphery//integral component of plasma membrane//intrinsic component of membrane//cell part//membrane//plasma membrane part//intrinsic component of plasma membrane//cellular_component//membrane part	--
AAEL000431	supercont1.8	-	1060441	1061857	1298	282	245	189	260	321	224	327	263	316	10.9525	9.88311	7.96638	12.6512	11.0991	7.63435	12.8652	10.3292	11.6002	9.60067	10.4615	11.5982	252.717	249.91	0.01611	0.92765	1	FALSE	270.896	292.241	-0.10942	0.74475	1	FALSE	278.899	254.023	0.13478	0.67088	1	FALSE	--	--	--	--	--
AAEL000432	supercont1.8	-	80442	81413	972	0	0	0	0	2	0	0	0	1	0	0	0	0	0.0923463	0	0	0	0.0490217	0	0.0307821	0.0163406	0.543227	0	Inf	0.90232	1	FALSE	0.582666	0.266012	1.1312	0.98937	1	FALSE	0.254089	0	Inf	1	1	FALSE	GO:0006461//GO:0071822//GO:0006334//GO:0071824//GO:0050896//GO:0065004//GO:0071103//GO:0006996//GO:0009987//GO:0071840//GO:0051276//GO:0009607//GO:0051704//GO:0042742//GO:0009605//GO:0006333//GO:0006323//GO:0051707//GO:0006325//GO:0043933//GO:0006950//GO:0006952//GO:0008150//GO:0009617//GO:0098542//GO:0031497//GO:0016043//GO:0044085//GO:0022607//GO:0070271//GO:0034728//GO:0043207//GO:0034622//GO:…	protein complex assembly//protein complex subunit organization//nucleosome assembly//protein-DNA complex subunit organization//response to stimulus//protein-DNA complex assembly//DNA conformation change//organelle organization//cellular process//cellular component organization or biogenesis//chromosome organization//response to biotic stimulus//multi-organism process//defense response to bacteriu…	GO:0044424//GO:0044464//GO:0005623//GO:0043226//GO:0005634//GO:0043229//GO:0005575//GO:0005622//GO:0043231//GO:0043227	intracellular part//cell part//cell//organelle//nucleus//intracellular organelle//cellular_component//intracellular//intracellular membrane-bounded organelle//membrane-bounded organelle	--
AAEL000433	supercont1.8	-	93205	144340	2207	231	282	174	197	292	254	314	290	324	5.27654	6.69035	4.31341	5.63763	5.93795	5.09132	7.26558	6.69854	6.99515	5.42677	5.55563	6.98642	231.622	235.821	-0.02592	0.93716	1	FALSE	248.19	300.569	-0.27625	0.40193	0.88753	FALSE	286.841	239.546	0.25995	0.47616	1	FALSE	GO:0008150//GO:0046483//GO:0009987//GO:0006807//GO:0006139//GO:0006260//GO:0006270//GO:0006725//GO:0044238//GO:0043170//GO:1901360//GO:0050896//GO:0009058//GO:0006950//GO:0006952//GO:0044249//GO:0008152//GO:0009059//GO:0006259//GO:0090304//GO:1901576//GO:0034641//GO:0071704//GO:0034645//GO:0051704//GO:0044237//GO:0006261//GO:0044260//GO:0009405	biological_process//heterocycle metabolic process//cellular process//nitrogen compound metabolic process//nucleobase-containing compound metabolic process//DNA replication//DNA replication initiation//cellular aromatic compound metabolic process//primary metabolic process//macromolecule metabolic process//organic cyclic compound metabolic process//response to stimulus//biosynthetic process//respo…	GO:0016020//GO:0005578//GO:0044421//GO:0005576//GO:0005575//GO:0031012	membrane//proteinaceous extracellular matrix//extracellular region part//extracellular region//cellular_component//extracellular matrix	GO:0043168//GO:0043167//GO:0019855//GO:0046872//GO:0043169//GO:0003677//GO:0043394//GO:0097159//GO:0016247//GO:0043395//GO:1901363//GO:0003676//GO:0098772//GO:1901681//GO:0001948//GO:0005515//GO:0046914//GO:0016248//GO:0097367//GO:0008200//GO:0008270//GO:0005488//GO:0003674//GO:0005246
AAEL000434	supercont1.8	+	3711414	3730662	2082	201	239	154	178	223	220	203	183	264	4.86693	6.01062	4.04682	5.39973	4.80706	4.67456	4.97919	4.48079	6.04196	4.97479	4.96045	5.16731	195.159	204.476	-0.067279	0.82358	1	FALSE	209.117	207.091	0.014047	0.98298	1	FALSE	197.646	207.73	-0.071789	0.83237	1	FALSE	GO:0044699//GO:0051179//GO:1902578//GO:0051234//GO:0008150//GO:0009987//GO:0006810//GO:0044765//GO:0055085//GO:0044763	single-organism process//localization//single-organism localization//establishment of localization//biological_process//cellular process//transport//single-organism transport//transmembrane transport//single-organism cellular process	GO:0044425//GO:0016020//GO:0005575//GO:0031224//GO:0016021	membrane part//membrane//cellular_component//intrinsic component of membrane//integral component of membrane	GO:0001883//GO:0015405//GO:0001882//GO:0042623//GO:0016301//GO:0016462//GO:0032559//GO:0032555//GO:0003824//GO:1901363//GO:0032550//GO:0005215//GO:0097159//GO:0017111//GO:0030554//GO:0016887//GO:0003924//GO:0043168//GO:0000166//GO:0032549//GO:0005525//GO:0043167//GO:0005488//GO:0016820//GO:0016740//GO:0022804//GO:0097367//GO:0005524//GO:0032561//GO:0019001//GO:0003674//GO:0043492//GO:0042626//GO:…
AAEL000435	supercont1.8	-	1763777	1768270	1557	64	94	52	69	152	65	76	56	131	2.0722	3.16112	1.82721	2.79894	4.38138	1.84682	2.49269	1.83351	4.00901	2.35351	3.00904	2.7784	86.9862	71.4278	0.2843	0.47841	1	FALSE	93.2488	81.2513	0.19869	0.62326	1	FALSE	77.5559	72.5295	0.096669	0.78586	1	FALSE	GO:0051234//GO:1902578//GO:0006139//GO:0006807//GO:0065007//GO:0046907//GO:0072594//GO:0046483//GO:0016071//GO:0044248//GO:0009987//GO:0008150//GO:0006810//GO:0034504//GO:0006913//GO:0010467//GO:0006812//GO:0006304//GO:0051649//GO:0006811//GO:0043170//GO:0010508//GO:0031329//GO:0044238//GO:0008104//GO:0044699//GO:0009894//GO:0006725//GO:0017038//GO:0006397//GO:0008152//GO:0031325//GO:0034613//GO:…	establishment of localization//single-organism localization//nucleobase-containing compound metabolic process//nitrogen compound metabolic process//biological regulation//intracellular transport//establishment of protein localization to organelle//heterocycle metabolic process//mRNA metabolic process//cellular catabolic process//cellular process//biological_process//transport//protein localizatio…	GO:0044446//GO:0044428//GO:0000347//GO:0044424//GO:0044464//GO:0016020//GO:0044422//GO:0044425//GO:0043234//GO:0005634//GO:0043229//GO:0005623//GO:0071944//GO:0005886//GO:0043227//GO:0000346//GO:0016021//GO:0043231//GO:0043226//GO:0032991//GO:0000445//GO:0031224//GO:0005575//GO:0005622	intracellular organelle part//nuclear part//THO complex//intracellular part//cell part//membrane//organelle part//membrane part//protein complex//nucleus//intracellular organelle//cell//cell periphery//plasma membrane//membrane-bounded organelle//transcription export complex//integral component of membrane//intracellular membrane-bounded organelle//organelle//macromolecular complex//THO complex p…	GO:0046983//GO:0045502//GO:0003677//GO:0003824//GO:0022890//GO:1901363//GO:0022891//GO:0003676//GO:0097159//GO:0005215//GO:0022892//GO:0008134//GO:0046873//GO:0042802//GO:0022857//GO:0008324//GO:0005488//GO:0005515//GO:0015075//GO:0042803//GO:0003674
AAEL000436	supercont1.8	+	394885	407961	1313	74	143	74	111	162	91	147	92	211	2.84123	5.70261	3.08348	5.33939	5.5374	3.06602	5.71736	3.57197	7.65724	3.87577	4.6476	5.64886	113.192	98.1401	0.20586	0.64425	1	FALSE	121.344	139.577	-0.20196	0.49697	0.94715	FALSE	133.227	99.6221	0.41935	0.25958	1	FALSE	--	--	--	--	GO:0003674//GO:0005515//GO:0005488
AAEL000437	supercont1.8	-	4741092	4761002	609	7	2	6	5	4	8	8	18	9	0.579456	0.171955	0.539023	0.518544	0.29478	0.581128	0.670835	1.50674	0.704173	0.430145	0.464817	0.960584	5.44785	5.5944	-0.038296	1	1	FALSE	5.83486	11.9573	-1.0351	0.32049	0.82181	FALSE	11.4086	5.7015	1.0007	0.32036	1	FALSE	--	--	--	--	GO:0016787//GO:0005515//GO:0016791//GO:0005488//GO:0003674//GO:0003993//GO:0043167//GO:0046872//GO:0016788//GO:0043169//GO:0003824//GO:0042578
AAEL000438	supercont1.8	+	1152651	1162435	1606	168	131	130	133	192	172	174	155	218	5.27355	4.27098	4.42865	5.23045	5.36552	4.73785	5.53282	4.92006	6.46793	4.65773	5.11127	5.64027	155.144	151.938	0.030125	0.83851	1	FALSE	166.24	174.585	-0.070661	0.84731	1	FALSE	166.621	154.534	0.10865	0.67209	1	FALSE	GO:0051641//GO:0006796//GO:0006629//GO:0044237//GO:0045184//GO:0033036//GO:0006505//GO:0044255//GO:0046486//GO:0071704//GO:0019637//GO:0071702//GO:0006650//GO:0006644//GO:0044763//GO:0006793//GO:0070727//GO:0006886//GO:1903509//GO:0008152//GO:1901135//GO:0034613//GO:0044710//GO:0051179//GO:0015031//GO:0051649//GO:0044238//GO:0008104//GO:0046488//GO:0044699//GO:0006810//GO:0051234//GO:0006664//GO:…	cellular localization//phosphate-containing compound metabolic process//lipid metabolic process//cellular metabolic process//establishment of protein localization//macromolecule localization//GPI anchor metabolic process//cellular lipid metabolic process//glycerolipid metabolic process//organic substance metabolic process//organophosphate metabolic process//organic substance transport//glyceropho…	--	--	GO:0003674//GO:0016787//GO:0003824//GO:0016788
AAEL000439	supercont1.8	+	17445	54766	2391	35	64	40	25	49	46	66	55	83	0.737952	1.40153	0.91528	0.660379	0.919755	0.851093	1.40964	1.17265	1.65407	1.01825	0.810409	1.41212	37.0306	47.4832	-0.3587	0.51592	1	FALSE	39.6678	64.8383	-0.70888	0.11567	0.5327	FALSE	61.8818	48.2273	0.35967	0.44859	1	FALSE	--	--	GO:0043226//GO:0005623//GO:0044464//GO:0044424//GO:0005622//GO:0005575//GO:0043227//GO:0043231//GO:0043229//GO:0005634	organelle//cell//cell part//intracellular part//intracellular//cellular_component//membrane-bounded organelle//intracellular membrane-bounded organelle//intracellular organelle//nucleus	GO:0005488//GO:0008270//GO:0046914//GO:0043169//GO:0046872//GO:0003674//GO:0043167
AAEL000440	supercont1.8	+	540501	595806	3680	680	679	583	499	536	581	665	715	800	9.31538	9.66104	8.66751	8.56418	6.53691	6.98437	9.2282	9.90473	10.3585	9.21464	7.36182	9.83047	511.484	681.01	-0.41299	0.1482	0.85503	FALSE	548.079	705.803	-0.36488	0.18349	0.66568	FALSE	673.565	692.384	-0.039754	0.91365	1	FALSE	--	--	GO:0016021//GO:0031224//GO:0005575//GO:0016020//GO:0044425	integral component of membrane//intrinsic component of membrane//cellular_component//membrane//membrane part	GO:0003674//GO:0005515//GO:0005488
AAEL000441	supercont1.8	-	3367390	3380406	853	23	25	6	10	4	24	32	98	42	1.35931	1.53459	0.384836	0.74043	0.210459	1.24469	1.91577	5.85682	2.34614	1.09291	0.731859	3.37291	12.3619	17.8579	-0.53066	0.45475	1	FALSE	13.2309	59.4739	-2.1683	0.082853	0.45044	FALSE	56.7418	18.1085	1.6477	0.18003	1	FALSE	--	--	--	--	--
AAEL000442	supercont1.8	+	895165	909058	1431	43	4715	819	1479	3053	6	2836	774	5003	1.51484	172.522	31.3125	65.2772	95.7509	0.185486	101.207	27.5731	166.589	68.4497	53.7379	98.4562	1366.17	1696.34	-0.31228	0.74839	1	FALSE	1466.22	2553.95	-0.80063	0.34136	0.842	FALSE	2438.25	1714.26	0.50826	0.70811	1	FALSE	--	--	--	--	--
AAEL000443	supercont1.8	-	4549782	4565148	1257	0	4	1	0	0	1	0	0	0	0	0.16662	0.043525	0	0	0.0351936	0	0	0	0.0700483	0.0117312	0	0.319083	1.554	-2.284	0.6626	1	FALSE	0.340819	0	Inf	0.99812	1	FALSE	0	1.57205	#NAME?	0.41052	1	FALSE	GO:0044765//GO:0015672//GO:0006814//GO:0030001//GO:0044699//GO:0006811//GO:0051179//GO:0008150//GO:1902578//GO:0051234//GO:0006812//GO:0006810	single-organism transport//monovalent inorganic cation transport//sodium ion transport//metal ion transport//single-organism process//ion transport//localization//biological_process//single-organism localization//establishment of localization//cation transport//transport	GO:0005575//GO:0016020	cellular_component//membrane	GO:0022803//GO:0003674//GO:0015075//GO:0022838//GO:0046873//GO:0008324//GO:0015081//GO:0022857//GO:0015267//GO:0005216//GO:0005215//GO:0022892//GO:0022891//GO:0022890//GO:0005261//GO:0005272//GO:0015077
AAEL000444	supercont1.8	-	250256	288387	5583	1174	1568	824	1307	2006	1359	1599	1010	1636	10.6008	14.7055	8.07483	14.7857	16.1257	10.7684	14.6259	9.22228	13.9627	11.1271	13.8933	12.6036	1451.29	1211.45	0.2606	0.34373	1	FALSE	1555.48	1346.49	0.20815	0.40752	0.89281	FALSE	1285.11	1230.04	0.063191	0.87322	1	FALSE	GO:0071704//GO:0034645//GO:0043412//GO:0044237//GO:0044723//GO:1901137//GO:0008150//GO:0006486//GO:1901135//GO:0008152//GO:0009059//GO:0044699//GO:0044238//GO:0043170//GO:0006464//GO:0019538//GO:0070085//GO:0044763//GO:1901576//GO:0009100//GO:0044260//GO:0044267//GO:0009101//GO:0043413//GO:0009987//GO:0036211//GO:0044710//GO:0009058//GO:0044249//GO:0005975	organic substance metabolic process//cellular macromolecule biosynthetic process//macromolecule modification//cellular metabolic process//single-organism carbohydrate metabolic process//carbohydrate derivative biosynthetic process//biological_process//protein glycosylation//carbohydrate derivative metabolic process//metabolic process//macromolecule biosynthetic process//single-organism process//p…	--	--	GO:0003674//GO:0016758//GO:0043130//GO:0035251//GO:0008194//GO:0005515//GO:0016740//GO:0005488//GO:0046527//GO:0016757//GO:0032182//GO:0003824//GO:0003980
AAEL000445	supercont1.8	-	2306910	2335523	1747	170	177	191	184	239	226	143	240	155	5.08312	5.4969	6.19797	6.89276	6.36204	5.92993	4.33133	7.25668	4.38055	5.59266	6.39491	5.32285	203.59	191.285	0.089943	0.69134	1	FALSE	218.155	180.578	0.27273	0.34842	0.84638	FALSE	172.304	194.598	-0.17555	0.65827	1	FALSE	--	--	--	--	--
AAEL000447	supercont1.8	+	4531180	4532637	1458	64	51	44	46	59	80	44	46	50	2.2129	1.83153	1.65108	1.99266	1.81614	2.42734	1.54113	1.60837	1.63406	1.89851	2.07872	1.59452	58.1922	55.8756	0.058608	0.87901	1	FALSE	62.3295	45.4141	0.45678	0.27448	0.77847	FALSE	43.3395	56.8108	-0.39048	0.42008	1	FALSE	--	--	--	--	GO:0005515//GO:0005488//GO:0003674
AAEL000448	supercont1.8	+	2441684	2459612	2523	911	955	586	614	793	799	800	784	995	18.2101	19.8272	12.7124	15.3765	14.1118	14.0152	16.199	15.8473	18.7989	16.9165	14.5012	16.9484	692.45	843.42	-0.28454	0.28346	1	FALSE	741.938	828.325	-0.1589	0.56962	0.98421	FALSE	790.519	856.784	-0.11613	0.66157	1	FALSE	--	--	--	--	--
AAEL000449	supercont1.8	+	1347353	1347679	327	0	0	0	0	0	0	0	0	0	0	0	0	0	0	0	0	0	0	0	0	0	0	0	NA	NA	NA	NA	0	0	NA	NA	NA	NA	0	0	NA	NA	NA	NA	--	--	--	--	--
AAEL000450	supercont1.8	-	2474423	2519783	5598	1468	1312	1216	1392	1984	1809	1561	1563	1829	13.22	12.2717	11.8843	15.7051	15.9061	14.2957	14.2401	14.2335	15.5681	12.4587	15.3023	14.6805	1619.65	1408.68	0.20134	0.3637	1	FALSE	1735.47	1599.18	0.11799	0.58467	0.98671	FALSE	1526.16	1432.5	0.091373	0.70327	1	FALSE	GO:0043087//GO:0019222//GO:0050789//GO:0008150//GO:0065007//GO:0050790//GO:0065009//GO:0008152//GO:0051336	regulation of GTPase activity//regulation of metabolic process//regulation of biological process//biological_process//biological regulation//regulation of catalytic activity//regulation of molecular function//metabolic process//regulation of hydrolase activity	GO:0005575//GO:0005576	cellular_component//extracellular region	GO:0005515//GO:0005488//GO:0005102//GO:0003674//GO:0005179
AAEL000451	supercont1.8	+	379794	390003	1573	295	325	265	300	544	347	422	269	426	9.45437	10.8182	9.21703	12.0455	15.5212	9.75887	13.7002	8.71782	12.9043	9.82988	12.4419	11.7741	367.004	309.137	0.24755	0.33539	1	FALSE	393.328	354.772	0.14884	0.55256	0.97183	FALSE	338.597	314.254	0.10764	0.67454	1	FALSE	--	--	--	--	--
AAEL000452	supercont1.8	+	1089745	1130002	2740	203	285	129	196	260	260	270	240	339	3.73495	5.44624	2.5758	4.51792	4.25871	4.1978	5.03218	4.46524	5.89527	3.919	4.32481	5.1309	224.484	207.758	0.11171	0.82373	1	FALSE	240.524	270.9	-0.17158	0.56585	0.9821	FALSE	258.543	210.864	0.29409	0.43927	1	FALSE	GO:0048666//GO:0051171//GO:0034654//GO:0040011//GO:0034645//GO:0050789//GO:0031326//GO:0071704//GO:0048731//GO:0060255//GO:0031323//GO:0090304//GO:0034641//GO:1901576//GO:0019222//GO:0019438//GO:0044763//GO:0097659//GO:0048856//GO:0050794//GO:0007399//GO:0044767//GO:0009889//GO:0048468//GO:0030154//GO:0080090//GO:0030030//GO:2001141//GO:0032990//GO:0007275//GO:0030182//GO:0044271//GO:0018130//GO:…	neuron development//regulation of nitrogen compound metabolic process//nucleobase-containing compound biosynthetic process//locomotion//cellular macromolecule biosynthetic process//regulation of biological process//regulation of cellular biosynthetic process//organic substance metabolic process//system development//regulation of macromolecule metabolic process//regulation of cellular metabolic pr…	GO:0043227//GO:0043226//GO:0043231//GO:0005623//GO:0005622//GO:0005575//GO:0044464//GO:0044424//GO:0005634//GO:0043229	membrane-bounded organelle//organelle//intracellular membrane-bounded organelle//cell//intracellular//cellular_component//cell part//intracellular part//nucleus//intracellular organelle	GO:0004402//GO:0016747//GO:0003674//GO:0016746//GO:0005488//GO:0008080//GO:0005515//GO:0016740//GO:0016410//GO:0016407//GO:0061733//GO:0034212//GO:0003824
AAEL000453	supercont1.8	+	429405	451735	513	0	0	0	1	1	0	1	0	0	0	0	0	0.123116	0.087486	0	0.0995464	0	0	0	0.0702008	0.0331821	0.633361	0	Inf	0.88799	1	FALSE	0.679927	0.325793	1.0614	0.98985	1	FALSE	0.310919	0	Inf	1	1	FALSE	--	--	--	--	--
AAEL000454	supercont1.8	-	2788715	2803612	1732	829	762	507	638	735	620	794	592	890	24.2133	23.1162	16.0709	23.346	19.1118	15.8909	23.4921	17.485	24.5699	21.1335	19.4496	21.849	628.262	726.131	-0.20886	0.43936	1	FALSE	673.361	724.233	-0.10507	0.66243	1	FALSE	691.207	737.814	-0.094139	0.77585	1	FALSE	GO:0008150//GO:0055114//GO:0044699//GO:0044710//GO:0008152	biological_process//oxidation-reduction process//single-organism process//single-organism metabolic process//metabolic process	--	--	GO:0016747//GO:0016491//GO:0016740//GO:0016746//GO:0003674//GO:0016614//GO:0016616//GO:0003824
AAEL000455	supercont1.8	-	3347712	3364894	1396	0	1	3	5	0	1	2	0	3	0	0.0375074	0.117574	0.226213	0	0.0316894	0.0731623	0	0.102398	0.0516936	0.0859675	0.05852	2.12782	1.54172	0.46483	0.95208	1	FALSE	2.28379	1.44962	0.65575	0.97283	1	FALSE	1.38411	1.57393	-0.18541	1	1	FALSE	--	--	--	--	GO:0016741//GO:0008168//GO:0003824//GO:0003674//GO:0016740
AAEL000456	supercont1.8	-	472417	473234	750	125	135	107	74	102	105	210	174	229	8.40211	9.42485	7.80542	6.23166	6.10372	6.19337	14.2988	11.8269	14.5489	8.54413	6.17625	13.5582	87.9776	128.004	-0.54098	0.17449	0.91634	FALSE	94.2579	196.583	-1.0605	0.0015042	0.028827	DOWN	187.612	130.113	0.52799	0.12539	0.89372	FALSE	GO:0008150//GO:0009987//GO:0065007//GO:0050896//GO:0044699//GO:0023052//GO:0007165//GO:0050789//GO:0035556//GO:0050794//GO:0044763//GO:0007154//GO:0051716//GO:0044700	biological_process//cellular process//biological regulation//response to stimulus//single-organism process//signaling//signal transduction//regulation of biological process//intracellular signal transduction//regulation of cellular process//single-organism cellular process//cell communication//cellular response to stimulus//single organism signaling	GO:0044464//GO:1902494//GO:0044428//GO:0044424//GO:0044446//GO:0043229//GO:0005634//GO:0043234//GO:0044422//GO:0000151//GO:0043231//GO:0043226//GO:0005680//GO:0043227//GO:0005623//GO:0005622//GO:1990234//GO:0005575//GO:0000152//GO:0032991//GO:0031461	cell part//catalytic complex//nuclear part//intracellular part//intracellular organelle part//intracellular organelle//nucleus//protein complex//organelle part//ubiquitin ligase complex//intracellular membrane-bounded organelle//organelle//anaphase-promoting complex//membrane-bounded organelle//cell//intracellular//transferase complex//cellular_component//nuclear ubiquitin ligase complex//macromo…	GO:0043167//GO:0019787//GO:0046872//GO:0003723//GO:0097159//GO:1901363//GO:0003676//GO:0043169//GO:0003824//GO:0061659//GO:0004842//GO:0003674//GO:0016740//GO:0005515//GO:0061630//GO:0046914//GO:0008270//GO:0005488
AAEL000457	supercont1.8	-	594802	605260	938	0	0	0	1	0	0	0	0	0	0	0	0	0.0673333	0	0	0	0	0	0	0.0224444	0	0.361747	0	Inf	1	1	FALSE	0.388595	0	Inf	0.99812	1	FALSE	0	0	NA	NA	NA	NA	--	--	--	--	--
AAEL000458	supercont1.8	+	1886413	1886827	350	585	586	488	490	861	550	940	663	651	85.9807	89.4552	77.8394	90.2267	112.659	70.9361	139.951	98.538	90.436	84.4251	91.2738	109.642	586.611	580.714	0.014576	0.84023	1	FALSE	628.699	735.663	-0.22667	0.54507	0.96782	FALSE	702.043	590.366	0.24995	0.41742	1	FALSE	--	--	--	--	--
AAEL000459	supercont1.8	+	493096	497624	1439	2091	2159	1808	1439	1805	1955	2446	2203	3041	73.2542	78.5586	68.7403	63.1587	56.2953	60.1014	86.8038	78.0438	100.696	73.5177	59.8518	88.5143	1634.62	2120.67	-0.37556	0.16582	0.89898	FALSE	1751.34	2457.27	-0.48859	0.054893	0.36126	FALSE	2345.17	2155.94	0.12137	0.61755	1	FALSE	GO:0044765//GO:0008643//GO:0044699//GO:0051234//GO:0008150//GO:0071702//GO:0051179//GO:0006810//GO:1902578	single-organism transport//carbohydrate transport//single-organism process//establishment of localization//biological_process//organic substance transport//localization//transport//single-organism localization	GO:0012505//GO:0005622//GO:0005575//GO:0043227//GO:0043231//GO:0043229//GO:0044444//GO:0044425//GO:0005737//GO:0005794//GO:0031224//GO:0043226//GO:0016021//GO:0005623//GO:0044422//GO:0000139//GO:0044431//GO:0031090//GO:0044464//GO:0016020//GO:0098588//GO:0044446//GO:0044424	endomembrane system//intracellular//cellular_component//membrane-bounded organelle//intracellular membrane-bounded organelle//intracellular organelle//cytoplasmic part//membrane part//cytoplasm//Golgi apparatus//intrinsic component of membrane//organelle//integral component of membrane//cell//organelle part//Golgi membrane//Golgi apparatus part//organelle membrane//cell part//membrane//bounding m…	GO:0003674//GO:0015075//GO:0015294//GO:0015295//GO:0051119//GO:0022857//GO:0022891//GO:1901476//GO:0022892//GO:0005215//GO:0015293//GO:0005351//GO:0022804//GO:0015144//GO:0008324//GO:0015291//GO:0005402
AAEL000460	supercont1.8	+	2411858	2417736	1631	211	320	151	168	290	165	298	177	305	6.52181	10.273	5.0652	6.50561	7.97994	4.47537	9.33051	5.53228	8.91046	7.28668	6.32031	7.92442	192.19	229.781	-0.25773	0.40378	1	FALSE	206.006	246.629	-0.25966	0.41176	0.89359	FALSE	235.389	233.228	0.01331	0.97518	1	FALSE	--	--	GO:0019867//GO:0005575//GO:0016020	outer membrane//cellular_component//membrane	--
AAEL000461	supercont1.8	+	2703402	2776411	3156	2490	2402	2086	1801	2147	2233	2175	2429	2626	53.6671	53.7706	48.793	48.6314	41.1962	42.2335	47.4867	52.9397	53.4957	52.0769	44.0204	51.3074	1947.17	2449.31	-0.33099	0.22428	1	FALSE	2086.4	2345.93	-0.16915	0.54963	0.97056	FALSE	2238.76	2490.3	-0.15362	0.60427	1	FALSE	GO:0050789//GO:0040011//GO:0050794//GO:0007399//GO:0007224//GO:0048856//GO:0048468//GO:0030154//GO:0030030//GO:0007166//GO:0007275//GO:0007154//GO:0032502//GO:0044700//GO:0048667//GO:0044707//GO:0048858//GO:0032501//GO:0016043//GO:0048812//GO:0022008//GO:0048699//GO:0008150//GO:0006928//GO:0023052//GO:0032989//GO:0048869//GO:0007409//GO:0044699//GO:0048666//GO:0007165//GO:0048731//GO:0044763//GO:…	regulation of biological process//locomotion//regulation of cellular process//nervous system development//smoothened signaling pathway//anatomical structure development//cell development//cell differentiation//cell projection organization//cell surface receptor signaling pathway//multicellular organismal development//cell communication//developmental process//single organism signaling//cell morph…	--	--	GO:0003674//GO:0042393//GO:0035064//GO:0005488//GO:0005515
AAEL000462	supercont1.8	-	2862907	2864946	1983	0	0	0	0	0	0	0	0	0	0	0	0	0	0	0	0	0	0	0	0	0	0	0	NA	NA	NA	NA	0	0	NA	NA	NA	NA	0	0	NA	NA	NA	NA	--	--	GO:0016020//GO:0005575	membrane//cellular_component	GO:0005231//GO:0022803//GO:0015276//GO:0022836//GO:0022838//GO:0004872//GO:0038023//GO:0004871//GO:0004970//GO:0005216//GO:0022834//GO:0015267//GO:0005234//GO:0008066//GO:0015075//GO:0060089//GO:0003674//GO:0022857//GO:0005230//GO:0022891//GO:0005215//GO:0022892//GO:0004888
AAEL000463	supercont1.8	-	524640	525381	675	0	2	1	0	0	0	0	3	1	0	0.155142	0.0810531	0	0	0	0	0.22657	0.0705912	0.0787316	0	0.0990537	0	0.986675	#NAME?	0.71563	1	FALSE	0	1.42548	#NAME?	0.51955	0.9564	FALSE	1.35982	1.00074	0.44235	1	1	FALSE	--	--	--	--	--
AAEL000464	supercont1.8	+	3321563	3325135	2009	9	18	14	3	32	8	5	7	32	0.225841	0.469132	0.38126	0.0943136	0.714868	0.176161	0.127096	0.177624	0.75897	0.358744	0.328447	0.354564	12.3295	14.2052	-0.2043	0.96194	1	FALSE	13.215	12.8468	0.040768	0.98973	1	FALSE	12.2655	14.437	-0.23517	0.92367	1	FALSE	GO:0051179//GO:0044699//GO:0006810//GO:1902578//GO:0051234//GO:0008150//GO:0009401//GO:0044765//GO:0071702//GO:0008643	localization//single-organism process//transport//single-organism localization//establishment of localization//biological_process//phosphoenolpyruvate-dependent sugar phosphotransferase system//single-organism transport//organic substance transport//carbohydrate transport	--	--	--
AAEL000465	supercont1.8	+	1756944	1757871	871	54	77	47	43	73	51	63	59	83	3.12547	4.62887	2.95225	3.11805	3.76149	2.5903	3.69373	3.45317	4.54061	3.56886	3.15662	3.89584	51.6561	60.9217	-0.23802	0.63441	1	FALSE	55.3586	65.4069	-0.24063	0.60398	0.99614	FALSE	62.4234	61.8781	0.012657	1	1	FALSE	GO:0008150//GO:0055114//GO:0044699//GO:0008152//GO:0044710	biological_process//oxidation-reduction process//single-organism process//metabolic process//single-organism metabolic process	--	--	GO:0003824//GO:0016491//GO:0003674
AAEL000466	supercont1.8	-	3484244	3587070	2961	0	0	0	2	0	1	0	0	1	0	0	0	0.0426604	0	0.0149403	0	0	0.0160922	0	0.0192002	0.00536407	1.04258	0	Inf	0.74662	1	FALSE	1.11801	0.266012	2.0714	0.83548	1	FALSE	0.254089	0	Inf	1	1	FALSE	GO:0044699//GO:0051252//GO:0006725//GO:0043170//GO:0006811//GO:2000112//GO:0044238//GO:0010468//GO:1901360//GO:0009058//GO:0051179//GO:0006355//GO:0008152//GO:0009059//GO:0044249//GO:1903506//GO:0046483//GO:0019219//GO:0009987//GO:0010556//GO:0008150//GO:0051234//GO:0006139//GO:0006807//GO:1902578//GO:0065007//GO:0006260//GO:0010467//GO:0006351//GO:0006810//GO:0032774//GO:0055085//GO:0044237//GO:…	single-organism process//regulation of RNA metabolic process//cellular aromatic compound metabolic process//macromolecule metabolic process//ion transport//regulation of cellular macromolecule biosynthetic process//primary metabolic process//regulation of gene expression//organic cyclic compound metabolic process//biosynthetic process//localization//regulation of transcription, DNA-templated//met…	GO:0044425//GO:0044424//GO:0016020//GO:0044464//GO:0031224//GO:0005575//GO:0005727//GO:0005622//GO:0005623//GO:0016021//GO:0046821	membrane part//intracellular part//membrane//cell part//intrinsic component of membrane//cellular_component//extrachromosomal circular DNA//intracellular//cell//integral component of membrane//extrachromosomal DNA	GO:0015267//GO:0005216//GO:0003677//GO:0097159//GO:0022892//GO:0005215//GO:1901363//GO:0003676//GO:0022891//GO:0005488//GO:0022803//GO:0015075//GO:0003674//GO:0022838//GO:0022857
AAEL000467	supercont1.8	+	4270128	4270962	776	125	172	88	110	167	99	181	195	281	8.12059	11.6056	6.20433	8.9529	9.65852	5.64381	11.9113	12.8102	17.2544	8.64352	8.08508	13.992	116.741	130.531	-0.16109	0.64067	1	FALSE	125.139	209.084	-0.74055	0.02244	0.21058	FALSE	199.548	132.523	0.59049	0.10401	0.84782	FALSE	GO:0043604//GO:0009058//GO:0044249//GO:0009987//GO:0006807//GO:0044267//GO:0043043//GO:1901564//GO:0044260//GO:0044271//GO:0019538//GO:0034641//GO:1901576//GO:0006412//GO:0006518//GO:0043170//GO:0044238//GO:0009059//GO:0008152//GO:0043603//GO:0008150//GO:0010467//GO:0044237//GO:1901566//GO:0034645//GO:0071704	amide biosynthetic process//biosynthetic process//cellular biosynthetic process//cellular process//nitrogen compound metabolic process//cellular protein metabolic process//peptide biosynthetic process//organonitrogen compound metabolic process//cellular macromolecule metabolic process//cellular nitrogen compound biosynthetic process//protein metabolic process//cellular nitrogen compound metabolic…	GO:0044424//GO:0044464//GO:0043228//GO:0005737//GO:0005840//GO:1990904//GO:0005623//GO:0043226//GO:0044444//GO:0030529//GO:0043229//GO:0005575//GO:0032991//GO:0005622//GO:0043232	intracellular part//cell part//non-membrane-bounded organelle//cytoplasm//ribosome//ribonucleoprotein complex//cell//organelle//cytoplasmic part//intracellular ribonucleoprotein complex//intracellular organelle//cellular_component//macromolecular complex//intracellular//intracellular non-membrane-bounded organelle	GO:0003735//GO:0005198//GO:0003674
AAEL000468	supercont1.8	-	1854635	1855877	1184	300	343	232	286	273	253	268	284	375	12.7735	15.1686	10.7204	15.2562	10.3482	9.45296	11.5592	12.2279	15.0916	12.8875	11.6858	12.9595	258.338	302.198	-0.22623	0.42541	1	FALSE	276.899	296.83	-0.10028	0.6906	1	FALSE	283.286	307.049	-0.11621	0.71243	1	FALSE	GO:0006996//GO:0071840//GO:0007010//GO:0008150//GO:0009987//GO:0016043	organelle organization//cellular component organization or biogenesis//cytoskeleton organization//biological_process//cellular process//cellular component organization	--	--	GO:0003779//GO:0005488//GO:0005515//GO:0003674//GO:0008092
AAEL000469	supercont1.8	-	963951	1043344	5631	1284	1581	954	1279	1592	1366	1299	1234	1837	11.4953	14.7011	9.26908	14.3456	12.6886	10.7316	11.7806	11.1716	15.5445	11.8218	12.5886	12.8322	1330.95	1309.11	0.023868	0.97016	1	FALSE	1426.37	1388.8	0.038514	0.90785	1	FALSE	1325.47	1329.71	-0.0046036	0.97528	1	FALSE	GO:0015988//GO:0015992//GO:0044763//GO:0098655//GO:0098662//GO:0015991//GO:0055085//GO:0034220//GO:0006818//GO:0015672//GO:0044765//GO:0009987//GO:0008150//GO:0007010//GO:0051234//GO:1902578//GO:0071840//GO:1902600//GO:0006812//GO:0098660//GO:0016043//GO:0006810//GO:0044699//GO:0006811//GO:0050896//GO:0051179//GO:0006996//GO:0006950//GO:0006952//GO:0090662	energy coupled proton transmembrane transport, against electrochemical gradient//proton transport//single-organism cellular process//cation transmembrane transport//inorganic cation transmembrane transport//ATP hydrolysis coupled proton transport//transmembrane transport//ion transmembrane transport//hydrogen transport//monovalent inorganic cation transport//single-organism transport//cellular pr…	GO:0033178//GO:0005575//GO:0032991//GO:0016469//GO:0016020//GO:0043234//GO:0044425//GO:0098796	proton-transporting two-sector ATPase complex, catalytic domain//cellular_component//macromolecular complex//proton-transporting two-sector ATPase complex//membrane//protein complex//membrane part//membrane protein complex	GO:0008092//GO:0015399//GO:0042625//GO:0016818//GO:0015078//GO:0022857//GO:0016817//GO:0016787//GO:0008324//GO:0044769//GO:0046914//GO:0022804//GO:0005515//GO:0016820//GO:0008270//GO:0005488//GO:0015075//GO:0042626//GO:0043492//GO:0003674//GO:0046961//GO:0019829//GO:0016887//GO:0017111//GO:0043167//GO:0046872//GO:0015077//GO:0003824//GO:0036442//GO:0016462//GO:0043169//GO:0003779//GO:0042623//GO:…
AAEL000470	supercont1.8	-	506625	508304	921	0	7	0	4	3	4	4	3	9	0	0.397961	0	0.274305	0.14619	0.192132	0.221791	0.166053	0.465626	0.132654	0.204209	0.28449	3.53816	1.98563	0.83341	0.8652	1	FALSE	3.79165	4.85675	-0.35717	0.78185	1	FALSE	4.63621	1.9996	1.2132	0.58811	1	FALSE	--	--	--	--	--
AAEL000471	supercont1.8	+	2143362	2201591	4725	62	123	48	92	417	68	75	48	66	0.661499	1.36303	0.555793	1.22976	3.96086	0.636658	0.810592	0.517874	0.665574	0.860107	1.94243	0.66468	168.241	77.2592	1.1228	0.28816	1	FALSE	180.412	60.5428	1.5753	0.15984	0.62328	FALSE	57.7805	78.3662	-0.43965	0.23481	1	FALSE	GO:0044763//GO:0055085//GO:0009987//GO:1902578//GO:0006810//GO:0051179//GO:0044765//GO:0008150//GO:0051234//GO:0044699	single-organism cellular process//transmembrane transport//cellular process//single-organism localization//transport//localization//single-organism transport//biological_process//establishment of localization//single-organism process	GO:0016021//GO:0031224//GO:0016020//GO:0005575//GO:0044425	integral component of membrane//intrinsic component of membrane//membrane//cellular_component//membrane part	GO:0004872//GO:0005488//GO:0005544//GO:0046872//GO:0043169//GO:0005509//GO:0005543//GO:0008289//GO:0060089//GO:0003674//GO:0043168//GO:0043167
AAEL000472	supercont1.8	+	461117	463555	670	153	188	162	124	213	179	222	204	272	11.5121	14.6921	13.2286	11.6891	14.2679	11.8189	16.9208	15.5217	19.3441	13.1443	12.592	17.2622	159.826	176.146	-0.14027	0.7696	1	FALSE	171.246	223.525	-0.38437	0.24367	0.74165	FALSE	213.326	179.086	0.25241	0.4241	1	FALSE	--	--	GO:0005623//GO:0005680//GO:0043231//GO:0043226//GO:0043227//GO:0005575//GO:0000152//GO:0032991//GO:0031461//GO:0005622//GO:1990234//GO:0044424//GO:0044428//GO:0044446//GO:1902494//GO:0044464//GO:0043234//GO:0000151//GO:0044422//GO:0005634//GO:0043229	cell//anaphase-promoting complex//intracellular membrane-bounded organelle//organelle//membrane-bounded organelle//cellular_component//nuclear ubiquitin ligase complex//macromolecular complex//cullin-RING ubiquitin ligase complex//intracellular//transferase complex//intracellular part//nuclear part//intracellular organelle part//catalytic complex//cell part//protein complex//ubiquitin ligase comp…	GO:0004842//GO:0046914//GO:0016740//GO:0005515//GO:0005488//GO:0008270//GO:0003674//GO:0043167//GO:0046872//GO:0019787//GO:0003824//GO:0043169
AAEL000473	supercont1.8	+	993847	996249	2403	0	3	0	1	5	3	4	0	1	0	0.0653687	0	0.0262833	0.0933839	0.0552289	0.0850059	0	0.019829	0.0217896	0.0582987	0.034945	2.67706	0.850983	1.6535	0.66647	1	FALSE	2.86772	1.56919	0.86989	0.70292	1	FALSE	1.49777	0.856973	0.80549	0.95989	1	FALSE	GO:0044700//GO:0007154//GO:0050794//GO:0050789//GO:0044699//GO:0023052//GO:0008150//GO:0051716//GO:0051704//GO:0009405//GO:0044763//GO:0007186//GO:0007165//GO:0050896//GO:0007218//GO:0009987//GO:0065007	single organism signaling//cell communication//regulation of cellular process//regulation of biological process//single-organism process//signaling//biological_process//cellular response to stimulus//multi-organism process//pathogenesis//single-organism cellular process//G-protein coupled receptor signaling pathway//signal transduction//response to stimulus//neuropeptide signaling pathway//cellul…	GO:0005575//GO:0005576	cellular_component//extracellular region	GO:0003674//GO:0098772//GO:0016248//GO:0008200//GO:0016247
AAEL000474	supercont1.8	+	2205967	2224811	2184	0	2	0	12	3	2	2	0	0	0	0.047949	0	0.347026	0.0616488	0.0405113	0.0467649	0	0	0.015983	0.149729	0.0155883	5.79397	0.567322	3.3523	0.19765	0.95981	FALSE	6.21877	0.651587	3.2546	0.16156	0.62538	FALSE	0.621838	0.571315	0.12225	1	1	FALSE	GO:0044763//GO:0055085//GO:0044765//GO:0006810//GO:0009987//GO:0008150//GO:0051234//GO:1902578//GO:0051179//GO:0044699	single-organism cellular process//transmembrane transport//single-organism transport//transport//cellular process//biological_process//establishment of localization//single-organism localization//localization//single-organism process	GO:0016021//GO:0031224//GO:0005575//GO:0016020//GO:0044425	integral component of membrane//intrinsic component of membrane//cellular_component//membrane//membrane part	GO:0016787//GO:0003674//GO:0016788//GO:0003824
AAEL000475	supercont1.9	+	3420303	3439046	1828	102	128	103	132	121	88	163	118	135	3.56842	4.65102	3.91063	5.78553	3.76857	2.70158	5.77652	4.17448	4.464	4.04336	4.08523	4.805	108.695	116.09	-0.094959	0.79203	1	FALSE	116.538	134.622	-0.20811	0.53341	0.96272	FALSE	128.474	118.005	0.12263	0.74976	1	FALSE	--	--	--	--	GO:0003674//GO:0005488//GO:0005515
AAEL000476	supercont1.9	+	1871940	1885695	1302	4	31	8	10	10	6	28	13	32	0.176731	1.42258	0.383599	0.553538	0.393342	0.232629	1.25319	0.580821	1.33635	0.660972	0.39317	1.05678	8.2481	13.5831	-0.71968	0.39023	1	FALSE	8.84419	22.659	-1.3573	0.052173	0.35077	FALSE	21.6281	13.75	0.65348	0.44206	1	FALSE	GO:0044267//GO:0010467//GO:0043043//GO:1901564//GO:0043603//GO:0009987//GO:0046483//GO:0033554//GO:0008150//GO:0006807//GO:0006139//GO:0050896//GO:0044710//GO:0009058//GO:1901360//GO:0006974//GO:0009059//GO:0008152//GO:0044249//GO:0006950//GO:0006725//GO:0044699//GO:0006281//GO:0043604//GO:0043170//GO:0044238//GO:0006412//GO:0034645//GO:0071704//GO:0006518//GO:0019538//GO:0006298//GO:1901576//GO:…	cellular protein metabolic process//gene expression//peptide biosynthetic process//organonitrogen compound metabolic process//cellular amide metabolic process//cellular process//heterocycle metabolic process//cellular response to stress//biological_process//nitrogen compound metabolic process//nucleobase-containing compound metabolic process//response to stimulus//single-organism metabolic proces…	GO:0044464//GO:0044424//GO:0043229//GO:0044444//GO:0030529//GO:0043226//GO:0043232//GO:0005840//GO:0005623//GO:1990904//GO:0005622//GO:0005737//GO:0043228//GO:0005575//GO:0032991	cell part//intracellular part//intracellular organelle//cytoplasmic part//intracellular ribonucleoprotein complex//organelle//intracellular non-membrane-bounded organelle//ribosome//cell//ribonucleoprotein complex//intracellular//cytoplasm//non-membrane-bounded organelle//cellular_component//macromolecular complex	GO:0043167//GO:0032549//GO:0000166//GO:0043168//GO:0005198//GO:0030554//GO:0030983//GO:0097159//GO:0032550//GO:0003676//GO:1901363//GO:0032555//GO:0032559//GO:0003690//GO:0001882//GO:0003677//GO:0001883//GO:0032553//GO:0036094//GO:0035639//GO:1901265//GO:0017076//GO:0003674//GO:0003735//GO:0097367//GO:0005524//GO:0005488
AAEL000477	supercont1.9	-	3829881	3831697	1520	57	105	71	48	84	59	76	71	121	1.89047	3.61699	2.55557	1.99448	2.48023	1.71715	2.55337	2.38122	3.79312	2.68768	2.06395	2.90923	59.0053	80.0049	-0.43924	0.33795	1	FALSE	63.2328	84.3886	-0.41637	0.29279	0.79798	FALSE	80.5436	81.2771	-0.013078	1	1	FALSE	GO:0044710//GO:0008152//GO:0044699//GO:0055114//GO:0008150	single-organism metabolic process//metabolic process//single-organism process//oxidation-reduction process//biological_process	--	--	GO:0003824//GO:0003674//GO:0016491
AAEL000478	supercont1.9	-	2014720	2017699	2862	181	194	184	143	176	184	267	236	324	3.18822	3.54923	3.5174	3.15573	2.75993	2.84411	4.76414	4.20365	5.39423	3.41828	2.91993	4.78734	158.245	197.117	-0.31689	0.3923	1	FALSE	169.554	264.386	-0.6409	0.034947	0.27697	FALSE	252.325	200.462	0.33196	0.27244	1	FALSE	--	--	GO:0019028//GO:0044423//GO:0005575//GO:0019012	viral capsid//virion part//cellular_component//virion	GO:0005198//GO:0003674
AAEL000480	supercont1.9	-	1579249	1579599	273	0	0	0	0	1	0	0	0	0	0	0	0	0	0.164397	0	0	0	0	0	0.0547989	0	0.271614	0	Inf	1	1	FALSE	0.291333	0	Inf	0.99811	1	FALSE	0	0	NA	NA	NA	NA	--	--	--	--	--
AAEL000482	supercont1.9	-	3667944	3668354	411	0	0	0	0	0	0	0	0	0	0	0	0	0	0	0	0	0	0	0	0	0	0	0	NA	NA	NA	NA	0	0	NA	NA	NA	NA	0	0	NA	NA	NA	NA	GO:0051716//GO:0007049//GO:0050789//GO:0050794//GO:0044763//GO:0006974//GO:0050896//GO:0006950//GO:0044699//GO:0051726//GO:0008150//GO:0009987//GO:0033554//GO:0065007	cellular response to stimulus//cell cycle//regulation of biological process//regulation of cellular process//single-organism cellular process//cellular response to DNA damage stimulus//response to stimulus//response to stress//single-organism process//regulation of cell cycle//biological_process//cellular process//cellular response to stress//biological regulation	--	--	GO:0003674//GO:0005488//GO:0097159//GO:0003676//GO:1901363//GO:0003677
AAEL000483	supercont1.9	+	2019819	2033894	3385	238	287	188	223	323	252	335	251	378	3.54452	4.43941	3.0386	4.16082	4.28252	3.29337	5.05393	3.78007	5.32093	3.67418	3.91224	4.71831	248.81	245.622	0.018605	0.94736	1	FALSE	266.643	306.702	-0.20193	0.49944	0.94862	FALSE	292.717	249.539	0.23024	0.47463	1	FALSE	GO:0044699//GO:0009894//GO:0006725//GO:0008104//GO:0044238//GO:0031329//GO:0051649//GO:0043170//GO:0010508//GO:0051179//GO:0015031//GO:0015012//GO:0048518//GO:0006914//GO:1901360//GO:0009058//GO:0044710//GO:1901135//GO:0009056//GO:0044249//GO:0034613//GO:0008152//GO:0006397//GO:0043436//GO:0031325//GO:0009059//GO:0006023//GO:0008150//GO:0006024//GO:0046907//GO:0046483//GO:0016071//GO:0009987//GO:…	single-organism process//regulation of catabolic process//cellular aromatic compound metabolic process//protein localization//primary metabolic process//regulation of cellular catabolic process//establishment of localization in cell//macromolecule metabolic process//positive regulation of autophagy//localization//protein transport//heparan sulfate proteoglycan biosynthetic process//positive regul…	GO:0044425//GO:0043234//GO:0044422//GO:0043229//GO:0005634//GO:0000347//GO:0044428//GO:0044424//GO:0044446//GO:0016020//GO:0044464//GO:0005575//GO:0031224//GO:0000445//GO:0032991//GO:0005622//GO:0005623//GO:0043231//GO:0043226//GO:0016021//GO:0043227//GO:0000346	membrane part//protein complex//organelle part//intracellular organelle//nucleus//THO complex//nuclear part//intracellular part//intracellular organelle part//membrane//cell part//cellular_component//intrinsic component of membrane//THO complex part of transcription export complex//macromolecular complex//intracellular//cell//intracellular membrane-bounded organelle//organelle//integral component…	--
AAEL000484	supercont1.9	+	3887764	3924028	1450	0	0	0	0	0	0	1	0	0	0	0	0	0	0	0	0.0352188	0	0	0	0	0.0117396	0	0	NA	NA	NA	NA	0	0.325793	#NAME?	1	1	FALSE	0.310919	0	Inf	1	1	FALSE	--	--	--	--	--
AAEL000485	supercont1.9	-	1942346	1983766	3555	2737	2456	1883	2216	2520	2903	2197	2365	2889	39.7177	37.0169	29.6547	40.2877	32.5557	36.9672	32.2956	34.7045	39.6253	35.4631	36.6035	35.5418	2412.4	2468.1	-0.032933	0.91407	1	FALSE	2584.68	2398.33	0.10796	0.66549	1	FALSE	2288.84	2508.66	-0.1323	0.65876	1	FALSE	GO:0006810//GO:0055114//GO:0072663//GO:0016043//GO:0072662//GO:1902578//GO:0051674//GO:0051234//GO:0006091//GO:0071840//GO:0009987//GO:0046907//GO:0072594//GO:0008150//GO:0006625//GO:0022615//GO:0017038//GO:0006996//GO:0008152//GO:0034613//GO:0022406//GO:0044710//GO:0043574//GO:0051179//GO:0015031//GO:0051649//GO:0008104//GO:0044743//GO:0006928//GO:0016558//GO:0044699//GO:0007031//GO:1902582//GO:…	transport//oxidation-reduction process//establishment of protein localization to peroxisome//cellular component organization//protein localization to peroxisome//single-organism localization//localization of cell//establishment of localization//generation of precursor metabolites and energy//cellular component organization or biogenesis//cellular process//intracellular transport//establishment of…	GO:0044464//GO:0042597//GO:0016020//GO:0044424//GO:0043229//GO:0005929//GO:0044444//GO:0044425//GO:0043227//GO:0016021//GO:0043231//GO:0043226//GO:0005623//GO:0031514//GO:0042579//GO:0042995//GO:0005777//GO:0005622//GO:0005737//GO:0031224//GO:0005575	cell part//periplasmic space//membrane//intracellular part//intracellular organelle//cilium//cytoplasmic part//membrane part//membrane-bounded organelle//integral component of membrane//intracellular membrane-bounded organelle//organelle//cell//motile cilium//microbody//cell projection//peroxisome//intracellular//cytoplasm//intrinsic component of membrane//cellular_component	GO:0046872//GO:0043167//GO:0016627//GO:0005506//GO:0046906//GO:1901363//GO:0097159//GO:0005509//GO:0003824//GO:0043169//GO:0016491//GO:0020037//GO:0003674//GO:0005488//GO:0046914//GO:0009055
[truncated: 16,504 more rows]
[truncated: 4 more columns]

## Sheet: R2d2vsWTtotalExpressed
Gene_id	readcount_R2D2	readcount_LVP	log2FoldChange	pval	padj	significant
AAEL000001	91.1803	93.9905	-0.043792	0.94034	1	FALSE
AAEL000002	4.69221	7.09885	-0.59732	0.6444	1	FALSE
AAEL000003	208.929	134.576	0.63459	0.052511	0.61848	FALSE
AAEL000004	244.996	164.87	0.57142	0.26264	1	FALSE
AAEL000005	83.7014	63.1331	0.40686	0.4156	1	FALSE
AAEL000006	1718.66	1036.75	0.72922	0.26275	1	FALSE
AAEL000007	0.622667	0.571315	0.12417	1	1	FALSE
AAEL000008	402.846	484.572	-0.26648	0.42796	1	FALSE
AAEL000009	0.254089	3.14598	-3.6301	0.26421	1	FALSE
AAEL000010	16475	17320.2	-0.072179	0.85441	1	FALSE
AAEL000012	3.34065	1.22178	1.4511	0.64413	1	FALSE
AAEL000013	104.191	139.521	-0.42125	0.32314	1	FALSE
[truncated: 11,655 more rows]

## Sheet: AaegL5.2uniqueTranscript
gene_stable_id	transcript_stable_id	protein_stable_id	xref	db_name	info_type	source_identity	xref_identity	linkage_type
[truncated: 12,522 more rows]
